# Supplementary material for: Enhanced pro-apoptosis gene signature following the activation of TAp63α in oocytes upon γ irradiation
Source: Cell Death Dis. 2022 Mar 4;13(3):204. doi: 10.1038/s41419-022-04659-2 (PMC8897389; doi:10.1038/s41419-022-04659-2)
Supplement: Supplementary file 5 — Suppl_Table_4_FDR [file 41419_2022_4659_MOESM5_ESM.xlsx]

## Sheet: mean_normalized_counts
Supplementary Table 4 geneID	0h_high	1h_high	2.5h_high	4h_high	6h_high	0h_low	1h_low	2.5h_low	4h_low	6h_low
	mean normalized counts	mean normalized counts	mean normalized counts	mean normalized counts	mean normalized counts	mean normalized counts	mean normalized counts	mean normalized counts	mean normalized counts	mean normalized counts
ENSMUSG00000000001	5981	4794	5100	4770	5337	4369	3726	4920	5369	6579
ENSMUSG00000000003	2	3	1	2	1	6	4	3	5	7
ENSMUSG00000000028	466	465	473	545	399	753	444	564	560	700
ENSMUSG00000000031	914	1793	1439	1815	1369	1097	1331	1491	1893	1342
ENSMUSG00000000037	724	647	762	720	691	429	804	1436	1264	704
ENSMUSG00000000049	10	9	2	4	5	21	11	19	9	5
ENSMUSG00000000056	813	710	975	1011	918	1102	1037	811	1707	1115
ENSMUSG00000000058	518	541	202	633	431	500	384	573	816	614
ENSMUSG00000000078	2671	3239	3877	2995	3896	3201	3535	3315	3769	5407
ENSMUSG00000000085	804	675	734	844	937	861	633	865	1007	1014
ENSMUSG00000000088	3133	4511	4163	3916	3399	3929	4015	4523	4474	5662
ENSMUSG00000000093	131	143	155	54	78	97	70	121	94	91
ENSMUSG00000000094	114	111	111	110	158	73	73	128	126	168
ENSMUSG00000000103	5	3	4	1	4	6	7	2	9	2
ENSMUSG00000000120	212	362	217	253	274	314	206	264	442	161
ENSMUSG00000000125	14	22	7	5	12	16	37	15	17	6
ENSMUSG00000000126	40	46	68	68	20	56	45	25	141	47
ENSMUSG00000000127	711	929	960	684	809	923	1027	1167	1087	1022
ENSMUSG00000000131	964	1298	1533	1346	1353	1194	1438	1827	1290	1130
ENSMUSG00000000134	428	414	388	509	489	587	437	359	439	422
ENSMUSG00000000142	357	306	309	173	208	247	470	475	182	390
ENSMUSG00000000148	277	319	329	375	227	558	506	708	468	305
ENSMUSG00000000149	1143	1195	968	1071	982	953	965	1108	1050	990
ENSMUSG00000000154	19	5	46	7	3	39	8	2	44	25
ENSMUSG00000000157	33	13	51	27	13	22	14	5	7	10
ENSMUSG00000000159	1	8	6	7	20	15	6	16	9	7
ENSMUSG00000000167	158	107	137	108	173	227	103	157	199	196
ENSMUSG00000000168	1168	1346	2286	1250	1592	1329	1031	1487	1226	1325
ENSMUSG00000000171	4929	4720	3815	4930	3645	3746	3938	4751	5093	5141
ENSMUSG00000000182	7	3	3	2	8	10	13	5	9	14
ENSMUSG00000000183	19	8	6	11	11	32	29	22	11	15
ENSMUSG00000000184	18067	30265	28781	31363	36096	37930	33403	35045	19021	30875
ENSMUSG00000000194	1038	775	1082	1050	1672	1558	1244	1475	1099	1377
ENSMUSG00000000197	181	179	311	163	184	370	429	231	269	218
ENSMUSG00000000202	28	4	18	15	13	32	18	9	9	26
ENSMUSG00000000204	66	23	25	53	80	26	27	8	42	34
ENSMUSG00000000214	915	1044	1423	978	1194	1348	1693	1683	1657	1152
ENSMUSG00000000215	13	8	9	5	1	1	7	53	13	2
ENSMUSG00000000216	7	4	4	8	28	19	16	5	2	16
ENSMUSG00000000223	337	191	262	211	229	302	212	250	362	366
ENSMUSG00000000244	111	91	62	38	68	79	47	87	88	78
ENSMUSG00000000247	25	12	9	12	17	23	26	24	17	14
ENSMUSG00000000248	8	10	6	11	13	25	38	21	11	8
ENSMUSG00000000253	2642	3059	3113	2515	3017	2480	3622	3651	2775	2315
ENSMUSG00000000263	11	5	9	8	2	32	34	11	7	8
ENSMUSG00000000266	409	556	421	396	383	263	322	457	499	404
ENSMUSG00000000275	725	657	498	778	619	637	741	742	601	1026
ENSMUSG00000000276	345	631	367	297	345	280	641	668	591	285
ENSMUSG00000000278	2004	2036	2292	2151	2057	2526	2582	2817	3167	2273
ENSMUSG00000000282	275	317	313	212	302	268	204	359	220	375
ENSMUSG00000000290	55	109	94	85	52	95	24	51	121	32
ENSMUSG00000000295	1836	1820	1449	1886	1416	1773	1454	1734	2001	2246
ENSMUSG00000000296	1390	1362	1148	1793	1248	1078	1325	1569	1536	1843
ENSMUSG00000000301	171	205	182	187	242	201	240	221	176	194
ENSMUSG00000000303	405	304	434	421	301	354	302	404	461	503
ENSMUSG00000000305	52	51	94	30	61	51	130	62	18	107
ENSMUSG00000000308	11	15	7	5	5	16	13	4	10	10
ENSMUSG00000000317	86	134	65	143	100	99	93	124	101	118
ENSMUSG00000000318	143	95	85	89	65	110	148	161	110	129
ENSMUSG00000000320	90	102	88	136	149	104	114	65	173	171
ENSMUSG00000000325	320	489	518	495	390	400	494	518	542	456
ENSMUSG00000000326	2137	1521	1288	1463	1225	1304	1036	2346	1807	3741
ENSMUSG00000000339	605	949	702	854	850	602	541	815	526	1128
ENSMUSG00000000340	635	815	451	765	528	742	661	538	470	846
ENSMUSG00000000346	9796	12512	15671	15711	11413	16060	14789	16309	16910	12409
ENSMUSG00000000355	901	937	812	913	646	787	923	1113	979	1039
ENSMUSG00000000359	76	225	201	221	218	250	294	175	238	102
ENSMUSG00000000365	1357	1112	1469	1064	1197	1421	1658	2870	2019	1194
ENSMUSG00000000374	268	342	417	428	273	288	260	270	575	283
ENSMUSG00000000378	281	358	426	300	470	305	251	265	434	359
ENSMUSG00000000381	1	7	3	0	1	6	6	5	1	2
ENSMUSG00000000384	294	329	505	447	347	332	339	560	589	379
ENSMUSG00000000385	7	9	34	9	29	19	15	11	11	11
ENSMUSG00000000386	14	9	10	34	54	33	22	40	15	33
ENSMUSG00000000392	243	412	251	170	140	248	173	204	374	268
ENSMUSG00000000394	3	0	3	1	1	4	3	2	3	4
ENSMUSG00000000399	5991	6334	6536	6535	5800	6326	5972	8093	7471	5982
ENSMUSG00000000402	121	70	157	124	106	186	107	120	209	106
ENSMUSG00000000409	79	84	79	86	154	64	85	63	11	61
ENSMUSG00000000411	1	2	0	8	1	5	7	2	3	1
ENSMUSG00000000416	537	772	1010	722	844	493	538	683	635	433
ENSMUSG00000000420	2590	2633	2972	2115	2136	2038	2537	3336	2890	2494
ENSMUSG00000000435	19	27	30	36	40	38	28	12	12	168
ENSMUSG00000000439	1891	2270	3413	2387	2028	3004	2659	2317	2592	1951
ENSMUSG00000000440	69	78	96	78	47	224	26	19	47	284
ENSMUSG00000000441	1191	755	825	923	1047	993	649	915	849	1392
ENSMUSG00000000486	72	109	114	150	182	145	97	156	97	106
ENSMUSG00000000489	249	190	133	294	174	418	283	268	140	173
ENSMUSG00000000530	75	105	40	214	270	234	127	38	163	247
ENSMUSG00000000531	45	74	49	35	26	61	51	42	33	71
ENSMUSG00000000532	194	199	189	297	231	280	159	233	328	344
ENSMUSG00000000538	941	978	1386	1438	1138	1349	1605	1856	1260	1231
ENSMUSG00000000544	10	1	17	3	12	23	14	2	6	7
ENSMUSG00000000552	29	48	36	69	47	29	19	40	34	59
ENSMUSG00000000555	356	434	556	427	640	540	466	485	520	497
ENSMUSG00000000560	91	67	23	39	84	72	55	62	70	35
ENSMUSG00000000561	1730	1511	1981	2478	2807	2307	1898	1746	2163	3640
ENSMUSG00000000562	15	16	11	16	32	24	32	21	24	18
ENSMUSG00000000563	11680	10813	10295	10222	9089	8821	10260	11367	12823	11968
ENSMUSG00000000567	155	196	132	141	123	109	115	175	188	177
ENSMUSG00000000568	2145	2090	1440	1809	1735	1558	1654	2308	1887	2310
ENSMUSG00000000579	1307	822	1943	1305	1539	342	785	1061	1354	434
ENSMUSG00000000581	5879	6788	6485	6840	5790	5556	6333	7207	7052	6099
ENSMUSG00000000594	2370	3211	4009	2882	3398	3181	2753	4163	3696	3968
ENSMUSG00000000600	2753	2506	2572	2540	2453	2340	1985	2685	2840	3084
ENSMUSG00000000605	1571	1871	2353	2271	2878	1942	1932	1743	2199	2582
ENSMUSG00000000606	8	5	3	7	6	10	16	14	4	2
ENSMUSG00000000617	8	9	5	7	9	13	29	7	8	6
ENSMUSG00000000627	8	22	9	22	13	12	64	31	6	15
ENSMUSG00000000628	210	229	191	197	281	181	184	115	278	353
ENSMUSG00000000631	502	637	561	953	1418	1049	921	1094	959	1469
ENSMUSG00000000632	32	20	7	10	7	31	14	18	17	23
ENSMUSG00000000673	5	17	3	20	17	2	34	26	15	4
ENSMUSG00000000682	45	32	19	24	25	51	49	9	23	38
ENSMUSG00000000686	67	30	34	42	21	28	34	98	52	68
ENSMUSG00000000690	9	3	6	19	2	9	10	16	6	20
ENSMUSG00000000693	70	124	124	113	74	96	89	97	149	149
ENSMUSG00000000701	4	11	3	10	4	11	12	8	7	23
ENSMUSG00000000706	103	140	154	6	13	60	32	8	249	64
ENSMUSG00000000708	651	532	490	561	559	591	374	570	544	492
ENSMUSG00000000711	1455	1740	1924	1585	1572	2025	1347	2076	1688	1707
ENSMUSG00000000724	6	4	7	5	10	19	23	15	18	11
ENSMUSG00000000730	26	45	0	14	15	19	16	11	14	20
ENSMUSG00000000731	24	11	11	11	19	13	25	16	27	12
ENSMUSG00000000732	352	372	326	459	339	561	208	310	443	603
ENSMUSG00000000738	388	301	254	242	319	279	287	300	230	257
ENSMUSG00000000739	286	406	346	437	372	308	400	542	377	469
ENSMUSG00000000740	7995	5516	3090	4375	3172	5424	5875	6091	4380	17007
ENSMUSG00000000743	973	1207	2414	1332	2019	2103	1377	1471	2038	1545
ENSMUSG00000000751	5361	5665	7159	6711	6041	8244	7119	7964	8129	7486
ENSMUSG00000000753	3033	3932	3756	3532	3826	3464	3391	2638	4499	3855
ENSMUSG00000000759	1055	1307	1599	1555	1488	1084	1288	1149	1883	1296
ENSMUSG00000000766	63	12	33	10	13	29	39	7	33	94
ENSMUSG00000000776	504	563	556	398	534	655	716	586	615	612
ENSMUSG00000000782	957	1048	626	919	862	733	730	1038	1101	1079
ENSMUSG00000000787	10586	8921	7918	8041	6171	8864	7685	9288	10238	8587
ENSMUSG00000000791	10	8	9	10	17	19	20	17	11	5
ENSMUSG00000000792	7	7	3	13	11	10	12	12	14	8
ENSMUSG00000000794	38	49	84	76	100	77	87	42	70	123
ENSMUSG00000000804	1587	1751	1559	1494	1571	1674	1789	1693	1809	1877
ENSMUSG00000000805	11	3	3	5	2	8	8	2	6	6
ENSMUSG00000000811	513	468	474	426	397	555	510	539	541	606
ENSMUSG00000000817	2	6	1	3	1	4	8	6	2	30
ENSMUSG00000000823	1897	2329	1674	1901	2359	1990	1694	2475	3140	2806
ENSMUSG00000000826	2348	2987	2721	3121	4132	2763	2780	3907	3847	2904
ENSMUSG00000000827	2730	3357	3806	3756	3398	4033	3455	3857	3437	3329
ENSMUSG00000000838	2452	2150	2375	2208	1932	1838	2193	2472	2912	2473
ENSMUSG00000000861	571	554	356	692	545	726	513	423	919	1180
ENSMUSG00000000869	54	57	66	54	48	24	33	40	47	50
ENSMUSG00000000876	527	605	667	495	542	627	756	545	594	758
ENSMUSG00000000881	281	393	375	315	415	281	443	322	390	149
ENSMUSG00000000884	225	482	500	392	353	724	298	251	569	337
ENSMUSG00000000889	58	1	2	18	33	20	1	54	28	33
ENSMUSG00000000901	1550	1853	2592	1796	2126	2036	1682	2020	2402	2947
ENSMUSG00000000902	4020	4304	5086	4623	4485	4763	5721	5434	6062	4887
ENSMUSG00000000903	29	11	16	23	6	17	26	31	20	28
ENSMUSG00000000915	383	1081	1313	987	1308	1033	1047	600	1060	534
ENSMUSG00000000916	353	565	795	646	695	814	571	506	583	658
ENSMUSG00000000934	418	410	662	665	707	670	627	857	763	907
ENSMUSG00000000938	21	16	4	31	22	18	26	29	51	9
ENSMUSG00000000942	27	18	4	11	1	14	17	4	12	6
ENSMUSG00000000948	109	145	275	197	222	192	225	217	168	127
ENSMUSG00000000957	1303	2058	1925	1788	1893	1862	1393	1082	1792	2051
ENSMUSG00000000958	120	132	71	184	116	292	171	223	221	154
ENSMUSG00000000959	1637	2053	1648	2271	1993	2261	1791	1855	2067	2421
ENSMUSG00000000976	862	944	1182	1071	1428	1453	778	1427	1288	1533
ENSMUSG00000000982	16	8	16	29	20	2	4	8	21	7
ENSMUSG00000000983	4	17	0	6	4	4	13	8	8	6
ENSMUSG00000001014	33	9	7	13	13	32	8	6	35	21
ENSMUSG00000001016	3798	4054	4592	4989	5217	4408	4666	5783	5860	5371
ENSMUSG00000001017	2100	2057	2186	1841	1984	1539	1356	1817	1543	2182
ENSMUSG00000001018	1437	1900	2021	1643	1550	1500	1267	1815	2040	2216
ENSMUSG00000001020	6	13	14	7	24	7	23	11	28	4
ENSMUSG00000001021	14	31	49	49	43	67	29	141	14	136
ENSMUSG00000001023	0	2	0	0	0	0	3	0	0	1
ENSMUSG00000001025	226	333	277	283	239	263	176	266	358	311
ENSMUSG00000001027	6	7	4	31	27	43	56	8	8	33
ENSMUSG00000001029	120	253	67	183	202	144	131	97	120	226
ENSMUSG00000001034	399	280	660	519	727	725	654	916	464	530
ENSMUSG00000001036	2686	2986	2702	2565	3435	2856	2786	2961	2695	3354
ENSMUSG00000001039	599	668	532	574	443	539	411	559	564	360
ENSMUSG00000001052	863	1058	1295	1003	1309	1012	1087	1069	1258	1261
ENSMUSG00000001053	64	35	21	52	22	65	52	35	36	58
ENSMUSG00000001054	435	486	304	463	468	291	361	369	539	885
ENSMUSG00000001056	1888	1765	1320	1762	1471	1508	1579	1601	1529	1998
ENSMUSG00000001062	501	335	332	343	368	283	328	393	426	334
ENSMUSG00000001065	140	246	169	197	251	52	222	246	435	143
ENSMUSG00000001076	7	3	1	4	9	14	7	4	2	8
ENSMUSG00000001082	636	603	960	847	915	757	590	1179	688	1048
ENSMUSG00000001089	892	1480	1804	1698	3275	1517	1157	1551	1712	1829
ENSMUSG00000001095	27	14	5	22	18	30	22	12	48	4
ENSMUSG00000001098	1878	2484	2633	2446	2132	2059	2173	1691	2588	2529
ENSMUSG00000001100	1036	1213	1178	1063	887	949	782	997	831	1188
ENSMUSG00000001103	37	43	8	82	17	70	17	34	61	60
ENSMUSG00000001105	2021	1996	1843	2078	1695	1658	1972	2503	2440	2399
ENSMUSG00000001119	4700	5531	6234	4106	5576	4711	2961	4335	5149	6312
ENSMUSG00000001120	603	785	1153	753	726	972	1025	912	932	643
ENSMUSG00000001123	694	763	478	854	1307	814	682	888	931	1060
ENSMUSG00000001127	2328	2631	2431	2608	2281	2446	2849	3388	3164	2618
ENSMUSG00000001128	78	111	78	144	111	87	45	76	92	53
ENSMUSG00000001131	692	856	658	764	546	486	553	776	726	742
ENSMUSG00000001134	451	476	544	487	487	451	608	781	620	741
ENSMUSG00000001138	371	477	434	445	469	598	570	525	436	793
ENSMUSG00000001143	643	879	936	950	624	992	1185	855	762	1128
ENSMUSG00000001150	932	783	1040	1470	1663	1100	858	986	1367	1425
ENSMUSG00000001151	949	1057	815	662	1010	1597	1084	1019	805	1466
ENSMUSG00000001155	5	5	1	24	11	21	19	13	6	19
ENSMUSG00000001156	399	343	785	747	845	412	542	575	682	589
ENSMUSG00000001157	845	667	474	652	475	677	457	540	554	912
ENSMUSG00000001158	2584	2747	2391	2776	2043	1828	2113	2637	2626	2736
ENSMUSG00000001166	6140	8399	11763	9178	8671	11229	9636	10203	12327	8713
ENSMUSG00000001168	5069	5658	6186	5022	3700	6009	6301	6526	7206	4731
ENSMUSG00000001173	1333	1131	1226	1239	891	964	1001	1334	1556	1366
ENSMUSG00000001175	16974	18109	16344	15612	14010	14415	14792	16447	16976	18264
ENSMUSG00000001211	810	1010	820	980	764	912	823	718	883	948
ENSMUSG00000001225	32	26	35	31	43	49	61	34	26	43
ENSMUSG00000001227	8	6	14	12	4	17	19	29	27	11
ENSMUSG00000001228	9225	8277	8371	7081	6879	7161	6799	9204	10731	10089
ENSMUSG00000001229	431	450	401	429	373	451	270	570	366	363
ENSMUSG00000001240	682	1031	947	868	627	823	974	768	922	1116
ENSMUSG00000001247	303	270	385	250	398	345	242	374	287	291
ENSMUSG00000001248	354	334	354	395	363	287	261	164	302	471
ENSMUSG00000001249	5	15	33	25	28	14	26	18	117	12
ENSMUSG00000001260	36	31	26	23	27	61	64	51	38	28
ENSMUSG00000001270	3176	3987	4457	4662	4200	6374	6642	5619	5861	4651
ENSMUSG00000001280	1834	2231	3522	2616	1849	2428	2977	1586	2928	1691
ENSMUSG00000001281	26	22	44	45	21	39	6	16	96	35
ENSMUSG00000001285	1346	1414	1306	1315	1216	1203	1374	1326	1755	1266
ENSMUSG00000001288	9	78	38	92	112	60	102	52	52	82
ENSMUSG00000001289	6721	7850	6750	8311	6349	6204	6438	7868	7370	7247
ENSMUSG00000001300	1375	1441	1152	1208	1030	804	898	2129	1333	1442
ENSMUSG00000001305	889	877	690	1097	927	751	522	730	1002	914
ENSMUSG00000001313	676	711	837	636	772	673	760	1061	446	429
ENSMUSG00000001323	791	679	718	673	945	779	673	924	932	752
ENSMUSG00000001333	18	13	13	6	19	23	29	36	10	15
ENSMUSG00000001334	1143	1453	1317	1116	1141	803	931	1429	1075	1113
ENSMUSG00000001348	174	203	103	104	98	108	114	141	169	130
ENSMUSG00000001349	211	159	47	78	104	32	145	130	137	120
ENSMUSG00000001366	672	534	564	661	530	406	581	540	781	776
ENSMUSG00000001376	2326	2452	2422	2343	1941	2493	2508	2921	2603	2774
ENSMUSG00000001380	2294	2209	2461	2447	2216	2282	2691	2523	2395	2531
ENSMUSG00000001383	1668	1746	1869	1863	1678	2074	1945	2421	2433	2311
ENSMUSG00000001403	5896	7318	7534	6719	5607	6177	7472	7537	7947	8047
ENSMUSG00000001415	474	398	400	515	583	472	496	700	417	616
ENSMUSG00000001416	6826	7074	7139	6616	6548	8263	7789	9790	7483	8541
ENSMUSG00000001418	863	1150	1069	1049	860	1047	1144	1469	1384	990
ENSMUSG00000001419	421	738	682	757	867	959	752	926	928	835
ENSMUSG00000001420	35	27	24	32	35	74	26	39	40	38
ENSMUSG00000001424	2156	3172	4689	3268	3954	4592	5119	3155	3143	2899
ENSMUSG00000001435	2188	3043	3868	3788	2748	2702	3708	4276	2327	2864
ENSMUSG00000001436	449	515	532	758	532	713	555	793	684	732
ENSMUSG00000001440	3667	3573	3636	3078	3356	4272	3870	4060	3661	4344
ENSMUSG00000001441	1563	1786	2012	1899	2290	1826	1586	1868	1932	2586
ENSMUSG00000001444	8	2	4	3	0	5	12	8	2	5
ENSMUSG00000001445	795	958	931	996	1358	1313	1368	1346	968	1228
ENSMUSG00000001467	1257	1255	1440	967	1052	1483	1158	1555	1534	1079
ENSMUSG00000001472	3430	4272	5020	4490	4451	3689	4084	4153	4416	3952
ENSMUSG00000001473	1568	1806	1317	1455	1967	2007	1085	1698	1756	2412
ENSMUSG00000001482	429	488	540	579	503	640	434	724	575	372
ENSMUSG00000001493	39	36	45	31	53	26	77	55	18	83
ENSMUSG00000001494	8	3	3	9	3	6	13	3	4	2
ENSMUSG00000001496	10	3	3	4	5	10	11	4	12	8
ENSMUSG00000001497	77	32	86	39	75	116	120	42	173	124
ENSMUSG00000001504	59	67	82	40	49	131	103	104	70	58
ENSMUSG00000001506	8881	14700	12191	11443	12162	13382	9381	15234	13912	24565
ENSMUSG00000001507	246	199	287	330	205	324	283	310	393	251
ENSMUSG00000001508	11	5	7	13	14	12	14	8	34	24
ENSMUSG00000001510	5	5	0	8	3	7	11	2	7	5
ENSMUSG00000001517	397	450	605	368	377	514	322	493	573	425
ENSMUSG00000001518	700	636	672	689	633	550	797	963	873	678
ENSMUSG00000001520	799	977	1065	719	829	1181	1060	685	1231	1100
ENSMUSG00000001521	582	602	549	596	607	433	480	856	791	860
ENSMUSG00000001524	267	439	376	495	289	342	391	380	344	292
ENSMUSG00000001525	17200	17853	19874	18075	23400	17609	13141	19510	23382	30218
ENSMUSG00000001542	1125	680	1016	1094	1030	675	1228	1209	1040	646
ENSMUSG00000001552	766	1119	783	1040	674	922	1039	1538	1787	1130
ENSMUSG00000001555	1990	3341	3842	3527	4008	3451	2807	3594	4695	2959
ENSMUSG00000001558	68	86	78	65	132	82	63	100	118	75
ENSMUSG00000001566	7	3	3	4	4	9	12	8	10	8
ENSMUSG00000001569	754	907	1081	794	959	675	938	1065	893	1352
ENSMUSG00000001576	1152	1211	1304	1389	1693	1203	1374	1640	1450	1393
ENSMUSG00000001583	15	12	17	49	27	24	8	15	57	12
ENSMUSG00000001588	20	13	11	22	16	26	18	33	19	14
ENSMUSG00000001604	381	472	460	564	583	511	317	375	636	570
ENSMUSG00000001622	12	15	9	20	11	22	34	14	28	40
ENSMUSG00000001627	1276	945	844	838	827	971	898	1004	906	1027
ENSMUSG00000001630	1813	1685	1820	2035	1731	1585	2159	2505	2040	2072
ENSMUSG00000001632	493	662	309	409	527	381	583	520	494	959
ENSMUSG00000001642	4299	3754	3886	4148	3779	4752	3931	4485	4302	4640
ENSMUSG00000001655	18	13	11	18	9	20	19	34	17	22
ENSMUSG00000001656	2	2	4	2	2	3	9	4	3	0
ENSMUSG00000001657	281	284	306	252	234	253	347	361	296	393
ENSMUSG00000001661	93	111	118	108	124	97	85	166	141	139
ENSMUSG00000001663	592	644	855	787	363	831	631	725	551	537
ENSMUSG00000001665	186	243	324	159	337	225	173	307	217	155
ENSMUSG00000001666	892	815	772	862	522	870	786	942	886	876
ENSMUSG00000001670	6	9	5	3	10	15	17	12	10	12
ENSMUSG00000001672	18	10	1	6	14	28	17	10	3	6
ENSMUSG00000001674	1563	1554	1502	1655	1259	1658	1657	1623	1561	1928
ENSMUSG00000001687	2711	2695	2556	3117	2926	2271	2034	2517	1969	2756
ENSMUSG00000001700	576	236	457	363	560	361	351	496	265	383
ENSMUSG00000001707	1816	1927	1563	1898	1648	1993	2129	2412	1783	1973
ENSMUSG00000001729	691	965	1098	1244	1027	1102	700	1159	1164	1062
ENSMUSG00000001739	83	40	48	101	51	82	32	81	98	71
ENSMUSG00000001741	77	103	78	84	65	110	69	77	52	72
ENSMUSG00000001750	253	315	431	353	461	280	365	373	481	252
ENSMUSG00000001751	352	319	477	339	509	372	450	373	275	391
ENSMUSG00000001755	721	699	1286	762	762	922	1021	690	802	851
ENSMUSG00000001761	998	853	748	916	771	808	670	1211	895	1038
ENSMUSG00000001763	121	119	116	95	118	161	93	131	79	162
ENSMUSG00000001767	2080	2243	2606	2893	2013	2996	2222	3280	2358	2486
ENSMUSG00000001768	2250	2506	2317	1920	1992	2521	2435	2741	2990	2699
ENSMUSG00000001773	14	3	20	9	14	44	14	18	26	11
ENSMUSG00000001774	1968	1786	2648	2400	2313	2319	1543	2591	1906	2540
ENSMUSG00000001783	2682	2479	2450	2886	3297	3604	2949	2768	3323	3162
ENSMUSG00000001785	1933	1759	2551	2359	1995	2426	2159	2514	2442	2870
ENSMUSG00000001786	608	582	923	947	740	793	679	1189	803	815
ENSMUSG00000001794	4074	4179	3755	3646	3452	2952	4608	4171	4457	3914
ENSMUSG00000001802	86	121	123	134	113	87	146	159	93	98
ENSMUSG00000001804	3	7	5	7	8	19	17	13	6	7
ENSMUSG00000001815	3	4	7	9	13	16	15	8	8	18
ENSMUSG00000001819	2	4	2	1	4	20	12	8	4	2
ENSMUSG00000001823	10	3	4	8	6	17	10	6	5	7
ENSMUSG00000001827	344	658	475	217	362	393	615	330	529	332
ENSMUSG00000001829	1022	1251	1611	1347	1562	1696	1434	1683	1932	1293
ENSMUSG00000001833	14545	15303	13262	13988	13680	12613	12528	17168	15674	14157
ENSMUSG00000001844	655	1054	947	1124	1057	1014	1114	840	1267	1013
ENSMUSG00000001847	2190	2241	1670	1950	1617	1814	1589	2599	2054	2841
ENSMUSG00000001855	1755	1749	1248	1473	1274	1781	1472	2937	2596	2498
ENSMUSG00000001864	485	661	1100	911	857	1136	567	908	518	1526
ENSMUSG00000001865	210	421	170	198	227	42	50	43	205	7
ENSMUSG00000001870	1119	1157	890	946	1026	866	882	759	794	970
ENSMUSG00000001891	3775	3096	2585	2257	1573	2361	2000	3285	3976	2769
ENSMUSG00000001901	14	10	11	7	32	20	31	17	8	25
ENSMUSG00000001909	1034	1169	1666	1229	1551	1700	1452	1523	1374	1161
ENSMUSG00000001910	484	486	517	502	331	605	532	847	583	495
ENSMUSG00000001911	1031	925	830	632	442	831	559	981	653	850
ENSMUSG00000001918	93	114	65	125	100	89	84	134	162	84
ENSMUSG00000001924	4703	5061	5702	5753	5711	5296	5468	7120	6664	5864
ENSMUSG00000001930	322	493	302	295	301	417	282	337	349	182
ENSMUSG00000001942	1256	1257	1253	1057	1286	1475	1195	974	1674	1841
ENSMUSG00000001943	14	9	22	22	19	17	31	12	12	6
ENSMUSG00000001946	305	366	145	290	322	543	226	547	396	225
ENSMUSG00000001948	317	419	358	408	243	350	501	542	463	319
ENSMUSG00000001962	2742	2804	3243	3188	3191	3593	4073	4147	4446	3819
ENSMUSG00000001964	637	710	881	850	811	570	651	885	814	981
ENSMUSG00000001983	150	164	147	189	200	88	184	177	241	205
ENSMUSG00000001985	437	378	668	240	225	369	265	275	204	516
ENSMUSG00000001986	687	709	814	1065	1435	332	821	1333	682	1158
ENSMUSG00000001988	7	5	1	2	2	7	4	6	11	5
ENSMUSG00000001995	448	453	378	433	537	394	441	718	492	352
ENSMUSG00000001998	801	611	526	694	695	484	609	1204	911	870
ENSMUSG00000001999	1350	1351	1387	1302	1161	1397	1730	1108	1618	1369
ENSMUSG00000002006	56	67	42	37	52	68	69	59	60	58
ENSMUSG00000002007	22	21	3	9	17	17	11	52	5	13
ENSMUSG00000002010	4267	4604	5113	4686	4802	4581	5247	5800	5912	4576
ENSMUSG00000002012	352	479	312	397	467	290	435	579	337	406
ENSMUSG00000002014	3006	3717	2746	3171	2734	3277	3234	3353	2921	3396
ENSMUSG00000002015	6070	5561	4881	5404	4538	5210	5569	6631	6179	5414
ENSMUSG00000002017	929	855	823	1072	1005	1216	1010	1081	1027	878
ENSMUSG00000002020	365	355	596	306	249	429	260	559	349	272
ENSMUSG00000002028	2460	1804	1459	1631	1439	1436	1665	2376	2354	2138
ENSMUSG00000002031	2223	2368	3311	3069	2857	2642	2797	2889	3843	3578
ENSMUSG00000002032	84	36	76	106	65	145	119	56	117	67
ENSMUSG00000002033	44	28	39	12	24	42	50	3	89	2
ENSMUSG00000002043	339	350	437	340	314	305	253	326	369	330
ENSMUSG00000002052	1270	1258	1214	1494	1149	1644	1782	1902	1384	1645
ENSMUSG00000002055	434	399	291	708	829	726	353	527	424	647
ENSMUSG00000002057	15	4	10	7	3	22	12	13	11	15
ENSMUSG00000002058	344	428	425	389	555	344	391	232	478	415
ENSMUSG00000002059	559	804	753	654	720	474	431	439	545	663
ENSMUSG00000002064	2268	2217	2032	2012	1831	2316	1613	2132	2180	2394
ENSMUSG00000002068	111	165	132	83	105	204	75	93	123	234
ENSMUSG00000002076	695	574	1016	842	652	973	934	768	1009	426
ENSMUSG00000002083	31	21	71	43	44	14	40	22	32	61
ENSMUSG00000002100	98	60	61	107	69	179	145	89	92	151
ENSMUSG00000002102	4327	5424	5558	5825	4943	5345	4594	5229	4780	4605
ENSMUSG00000002103	1305	1885	1849	1980	2324	1780	1932	2376	2288	2909
ENSMUSG00000002104	143	102	85	88	80	110	158	161	140	47
ENSMUSG00000002105	285	576	553	547	977	730	702	370	856	380
ENSMUSG00000002107	3758	4515	4758	3599	5305	3083	3799	5070	5757	3302
ENSMUSG00000002108	2	16	6	35	5	11	16	3	14	6
ENSMUSG00000002109	794	769	895	893	659	1115	1391	520	1097	959
ENSMUSG00000002111	10	3	18	5	8	53	23	4	7	16
ENSMUSG00000002129	2085	2181	3070	2629	2593	2969	3165	3270	3759	2885
ENSMUSG00000002147	1091	1366	1249	1617	972	1883	1879	2475	1618	1064
ENSMUSG00000002190	11	12	7	11	6	17	21	75	13	15
ENSMUSG00000002204	4	42	6	12	7	5	35	5	9	13
ENSMUSG00000002205	983	908	1415	1401	1039	1851	1256	1870	1397	1551
ENSMUSG00000002210	303	385	552	308	533	300	330	281	358	295
ENSMUSG00000002221	768	750	756	805	543	612	586	765	868	731
ENSMUSG00000002222	1324	1290	1182	1713	1391	1000	1170	1383	1340	1790
ENSMUSG00000002227	1238	1222	1113	1515	1194	1452	1068	1763	1966	1490
ENSMUSG00000002228	14	4	2	4	5	2	18	17	5	3
ENSMUSG00000002233	587	693	779	532	523	651	442	717	557	841
ENSMUSG00000002240	6	4	4	7	4	8	4	7	0	4
ENSMUSG00000002249	100	119	131	135	85	138	104	97	95	85
ENSMUSG00000002250	77	99	55	98	47	130	73	81	73	146
ENSMUSG00000002257	37	27	28	62	24	55	17	42	33	64
ENSMUSG00000002265	16092	19523	17229	14028	22359	14974	20231	24755	19456	14802
ENSMUSG00000002266	327	571	255	449	634	692	975	605	562	187
ENSMUSG00000002274	35	24	18	20	32	26	14	23	12	26
ENSMUSG00000002279	716	781	893	800	603	592	833	832	1116	605
ENSMUSG00000002280	263	712	899	762	791	946	542	1046	846	607
ENSMUSG00000002289	1365	1500	1543	1979	1490	1772	1845	1334	2467	2369
ENSMUSG00000002297	940	732	680	691	629	793	898	1046	790	1523
ENSMUSG00000002307	307	365	586	462	464	560	342	899	845	630
ENSMUSG00000002308	964	984	726	1037	708	1179	951	924	667	1129
ENSMUSG00000002319	942	1365	1417	1440	1855	1606	1749	1634	1620	1276
ENSMUSG00000002320	1011	1239	1514	1289	1491	1597	1124	1177	1579	1047
ENSMUSG00000002324	36	49	20	18	8	7	34	22	31	17
ENSMUSG00000002325	577	548	767	538	1786	850	675	400	674	1226
ENSMUSG00000002326	280	378	393	402	419	428	256	435	333	350
ENSMUSG00000002329	965	856	1071	1401	1080	1250	921	1215	1168	1435
ENSMUSG00000002332	781	672	639	573	817	902	752	807	757	779
ENSMUSG00000002341	31	21	23	24	13	26	36	35	37	36
ENSMUSG00000002342	337	540	252	554	454	887	219	953	233	582
ENSMUSG00000002343	136	202	253	268	176	115	262	303	203	172
ENSMUSG00000002345	544	556	558	655	438	606	578	563	597	731
ENSMUSG00000002346	594	685	487	1066	921	720	825	943	687	1141
ENSMUSG00000002365	422	428	363	421	447	411	353	385	379	398
ENSMUSG00000002372	834	929	1414	1173	1171	1023	912	1217	1312	1394
ENSMUSG00000002379	2209	2550	2164	2510	2053	2061	2148	2780	2455	2464
ENSMUSG00000002384	17	9	3	12	2	31	20	24	6	9
ENSMUSG00000002393	63	161	198	162	111	151	126	73	117	80
ENSMUSG00000002395	1938	2134	1721	1735	1743	2624	2472	2080	2293	2548
ENSMUSG00000002396	50	91	111	99	112	90	161	85	248	27
ENSMUSG00000002409	49	91	69	39	80	68	43	62	30	40
ENSMUSG00000002413	2439	2714	2734	2365	2506	2626	2669	3604	3224	3097
ENSMUSG00000002416	1500	1472	1089	1095	879	1192	1364	1403	1145	1448
ENSMUSG00000002428	1306	670	718	809	793	996	1061	855	984	1101
ENSMUSG00000002455	1769	1713	1574	1794	1724	1965	1726	1885	2012	2350
ENSMUSG00000002458	492	856	684	1002	959	871	721	749	800	828
ENSMUSG00000002459	15	19	8	11	11	23	34	24	21	32
ENSMUSG00000002475	272	206	226	267	217	391	376	345	265	296
ENSMUSG00000002477	3488	3533	3056	3444	2786	3251	3140	4041	4302	4825
ENSMUSG00000002486	356	275	546	565	545	422	183	264	637	508
ENSMUSG00000002489	322	325	495	705	828	466	398	775	484	420
ENSMUSG00000002496	11690	8978	8772	10010	8352	6661	6881	7287	7375	11934
ENSMUSG00000002500	7	2	19	9	2	7	13	20	20	0
ENSMUSG00000002504	422	577	483	603	390	499	494	428	453	475
ENSMUSG00000002524	5721	6781	8947	7097	7010	6715	6819	7302	8548	7989
ENSMUSG00000002546	766	699	728	771	959	1019	659	703	816	985
ENSMUSG00000002550	927	903	1206	903	1285	1296	990	793	1199	1195
ENSMUSG00000002565	69	68	17	36	11	64	29	136	35	38
ENSMUSG00000002578	87	164	67	116	60	140	199	79	82	133
ENSMUSG00000002580	1300	1411	1238	1244	767	1294	1309	1432	1380	1316
ENSMUSG00000002588	5	4	9	5	27	12	21	8	11	8
ENSMUSG00000002602	4189	4291	5920	5459	4417	3868	4035	6477	5376	4678
ENSMUSG00000002603	14	51	68	11	20	142	151	20	36	10
ENSMUSG00000002608	323	552	498	477	354	637	493	336	689	556
ENSMUSG00000002617	1264	993	881	705	859	1214	1217	1194	958	1198
ENSMUSG00000002625	645	777	1082	760	730	787	811	1214	992	1090
ENSMUSG00000002633	5	5	2	4	1	4	16	5	7	6
ENSMUSG00000002635	701	1300	991	1169	934	1251	1152	1337	1509	949
ENSMUSG00000002658	1531	2018	1857	2099	1789	1829	2235	2615	2109	1713
ENSMUSG00000002660	1626	1696	1513	1737	1689	1784	1647	1840	1742	1836
ENSMUSG00000002661	955	793	844	809	687	706	722	867	1007	836
ENSMUSG00000002664	3	3	6	3	6	10	7	0	1	6
ENSMUSG00000002668	32	20	2	20	3	7	17	4	4	26
ENSMUSG00000002679	1909	2024	1897	2094	1831	2127	2578	2338	2414	2402
ENSMUSG00000002688	462	520	417	394	282	362	452	615	565	298
ENSMUSG00000002699	136	45	74	116	48	73	153	196	377	8
ENSMUSG00000002718	5124	4264	5657	5542	5207	5065	5725	6422	6121	6487
ENSMUSG00000002728	2395	2360	2328	2576	2454	2459	2591	3195	2885	2802
ENSMUSG00000002731	1397	1271	1266	1396	1434	1231	918	1096	1585	1318
ENSMUSG00000002732	1323	1506	945	1255	892	1029	948	872	1212	1020
ENSMUSG00000002733	858	709	546	706	584	465	479	1247	638	1187
ENSMUSG00000002741	689	794	642	914	863	981	575	654	845	890
ENSMUSG00000002748	1994	1753	1549	1693	1405	1905	1525	2234	2172	2620
ENSMUSG00000002763	159	163	277	175	131	295	205	221	127	101
ENSMUSG00000002767	1279	1903	2162	2181	2164	1845	1838	2070	2012	2004
ENSMUSG00000002768	3457	3680	3615	3975	2896	3913	3839	4151	3943	3549
ENSMUSG00000002769	39	37	18	56	12	75	95	82	53	50
ENSMUSG00000002771	21	9	10	18	27	20	20	17	14	40
ENSMUSG00000002778	1282	1647	1103	1234	874	728	894	878	852	1221
ENSMUSG00000002781	180	223	258	131	157	458	305	262	300	43
ENSMUSG00000002791	4	2	9	22	27	13	12	4	22	7
ENSMUSG00000002797	2891	3162	2726	2685	1895	2858	2620	2536	2954	2493
ENSMUSG00000002799	255	320	504	610	1095	329	387	972	672	332
ENSMUSG00000002803	148	177	162	238	178	167	117	262	153	182
ENSMUSG00000002804	498	528	644	622	709	679	573	797	874	705
ENSMUSG00000002808	739	549	820	458	447	476	476	740	348	520
ENSMUSG00000002812	1008	1191	1414	1350	1039	1493	1662	1406	1584	1614
ENSMUSG00000002814	457	477	584	625	382	417	675	674	485	588
ENSMUSG00000002820	297	204	284	325	269	341	188	314	266	257
ENSMUSG00000002825	364	400	477	729	499	492	640	517	592	446
ENSMUSG00000002831	16	12	8	11	16	15	21	23	9	19
ENSMUSG00000002833	609	731	976	861	624	1001	731	957	839	747
ENSMUSG00000002835	446	277	361	324	215	474	293	325	397	293
ENSMUSG00000002844	1858	1810	1915	1447	1643	2383	2110	2417	2206	1800
ENSMUSG00000002845	778	930	952	936	998	1092	718	955	977	963
ENSMUSG00000002846	325	377	573	462	463	478	622	468	389	459
ENSMUSG00000002847	542	700	610	678	526	773	762	749	985	890
ENSMUSG00000002870	1304	1991	3640	2051	1959	2050	2040	1837	1669	1405
ENSMUSG00000002871	889	1299	1211	1255	1437	1819	1799	1852	1381	1220
ENSMUSG00000002881	671	1124	706	1125	1003	960	807	1161	1156	1015
ENSMUSG00000002885	365	431	300	557	599	531	491	369	318	521
ENSMUSG00000002897	93	97	26	64	225	195	97	124	192	238
ENSMUSG00000002900	6891	8598	7730	6942	8427	7212	6648	9532	8356	7226
ENSMUSG00000002908	55	134	31	78	106	25	39	110	120	34
ENSMUSG00000002910	144	154	291	274	248	83	198	420	177	223
ENSMUSG00000002930	3	2	0	4	4	11	8	4	5	5
ENSMUSG00000002944	1791	1431	1486	1817	1013	2028	1946	1342	2051	1051
ENSMUSG00000002948	654	886	767	824	578	683	833	873	958	1059
ENSMUSG00000002949	1883	2039	2381	2387	2491	1978	2375	2627	2076	2226
ENSMUSG00000002957	1057	1196	1583	1042	1024	1144	1069	1083	1238	1409
ENSMUSG00000002963	244	403	498	519	568	381	573	669	436	465
ENSMUSG00000002968	541	807	963	810	712	600	850	757	659	811
ENSMUSG00000002980	230	265	275	269	252	334	223	213	89	148
ENSMUSG00000002981	1599	2019	1983	1579	1624	1315	1036	1348	1350	1234
ENSMUSG00000002983	110	61	82	42	53	88	114	74	38	85
ENSMUSG00000002984	197	131	163	144	263	185	133	174	76	192
ENSMUSG00000002985	1143	2193	1554	2341	1774	959	980	1105	1257	718
ENSMUSG00000002992	114	237	200	204	101	144	191	257	276	12
ENSMUSG00000002996	7499	7381	9633	8269	7937	9619	9989	12571	12137	8607
ENSMUSG00000002997	3711	2257	2182	2265	1560	2323	1633	1599	2840	4085
ENSMUSG00000003031	2375	2715	2379	1937	2403	2786	4822	4500	5070	4475
ENSMUSG00000003032	265	257	111	165	132	233	231	136	169	416
ENSMUSG00000003033	1733	2317	2367	2562	2565	2448	2263	3010	2479	2560
ENSMUSG00000003037	1819	1933	2038	2547	2394	2937	2288	2886	2215	2783
ENSMUSG00000003038	20986	22007	17530	18674	17112	17566	17151	20092	20478	21109
ENSMUSG00000003039	2267	2574	2625	2678	2634	2135	2908	2932	3028	2537
ENSMUSG00000003051	131	128	308	368	225	394	341	383	458	349
ENSMUSG00000003053	21	36	36	40	43	46	26	60	58	9
ENSMUSG00000003062	1600	1891	1857	1784	1761	2536	2308	2233	2224	2222
ENSMUSG00000003068	491	657	776	604	467	509	531	387	526	502
ENSMUSG00000003070	103	177	185	119	110	151	67	80	113	221
ENSMUSG00000003072	1283	1804	1918	1559	1546	2151	2178	2092	1719	1836
ENSMUSG00000003099	500	821	1288	967	1311	630	857	766	741	549
ENSMUSG00000003119	1087	933	711	734	852	1212	1434	1147	935	1320
ENSMUSG00000003123	135	196	220	320	155	422	330	454	492	364
ENSMUSG00000003131	4218	4148	4973	4482	6251	3748	4437	4856	4809	5421
ENSMUSG00000003134	959	623	766	920	984	636	714	628	1020	1334
ENSMUSG00000003135	395	259	205	226	203	269	311	282	372	302
ENSMUSG00000003153	123	119	129	258	99	130	216	157	164	127
ENSMUSG00000003154	833	709	985	825	743	659	634	719	794	764
ENSMUSG00000003161	3028	3120	2709	2645	2822	2590	3013	3091	2621	3617
ENSMUSG00000003166	1207	1178	1335	1375	1273	1434	966	1293	1537	1802
ENSMUSG00000003184	618	816	688	656	575	618	979	707	901	712
ENSMUSG00000003190	255	345	259	332	291	449	508	423	427	568
ENSMUSG00000003198	419	386	468	464	292	303	400	523	435	464
ENSMUSG00000003199	376	439	441	317	432	398	240	316	321	374
ENSMUSG00000003200	658	749	762	860	592	866	919	1037	753	769
ENSMUSG00000003206	20	9	14	9	16	5	27	7	3	5
ENSMUSG00000003208	97	137	174	127	157	216	106	282	199	186
ENSMUSG00000003226	2167	1873	2062	1727	2345	2009	2119	2569	2296	3575
ENSMUSG00000003227	9	10	68	13	10	39	24	37	16	30
ENSMUSG00000003228	209	226	208	161	101	133	110	352	349	360
ENSMUSG00000003233	231	215	231	283	288	243	173	252	280	295
ENSMUSG00000003234	3323	2955	4238	3764	3857	4023	3932	4041	5142	3504
ENSMUSG00000003235	702	768	869	838	546	817	679	751	592	1020
ENSMUSG00000003269	515	522	870	512	681	620	608	659	626	783
ENSMUSG00000003271	34	48	12	18	6	44	20	18	21	45
ENSMUSG00000003273	16	26	28	12	19	45	56	14	43	5
ENSMUSG00000003279	730	861	1331	852	898	812	746	829	1003	750
ENSMUSG00000003282	502	665	423	566	661	725	686	692	831	766
ENSMUSG00000003283	66	57	73	57	120	57	53	104	60	95
ENSMUSG00000003299	1478	1657	2364	2166	1863	1868	2203	1913	2097	1196
ENSMUSG00000003308	589	703	1202	904	935	943	1072	1100	924	1154
ENSMUSG00000003309	771	956	1343	958	995	1219	1330	850	1341	1028
ENSMUSG00000003316	5065	4585	4902	3975	4373	3911	4560	5320	5389	4690
ENSMUSG00000003341	17	21	33	12	22	22	23	5	37	51
ENSMUSG00000003344	250	368	284	417	286	294	224	225	353	271
ENSMUSG00000003345	303	314	269	368	553	238	243	244	429	264
ENSMUSG00000003346	303	429	415	410	372	400	251	271	437	346
ENSMUSG00000003348	360	416	686	885	972	557	365	648	1101	560
ENSMUSG00000003352	156	243	380	218	258	258	219	269	204	252
ENSMUSG00000003354	18	59	83	62	62	89	90	118	41	86
ENSMUSG00000003355	386	303	197	287	149	192	156	299	273	295
ENSMUSG00000003360	241	404	230	263	366	434	633	641	555	776
ENSMUSG00000003363	2337	3167	4738	3363	3629	2993	3276	3624	3363	3594
ENSMUSG00000003378	80	52	65	90	241	79	46	123	116	102
ENSMUSG00000003379	13	12	28	22	2	28	7	14	10	11
ENSMUSG00000003380	1402	2709	2445	1916	1713	2045	1800	1956	2266	1469
ENSMUSG00000003382	382	392	289	415	339	560	460	513	730	703
ENSMUSG00000003402	807	705	1157	774	824	951	957	878	1032	804
ENSMUSG00000003410	172	83	142	87	171	137	113	52	156	74
ENSMUSG00000003411	55	31	50	59	91	132	90	107	97	117
ENSMUSG00000003418	89	44	12	53	129	81	77	69	62	66
ENSMUSG00000003420	1740	2657	2229	2081	2286	1992	2369	2379	2557	1702
ENSMUSG00000003421	1179	1620	1923	1771	1812	1606	1646	2232	1861	1554
ENSMUSG00000003423	641	818	997	690	755	576	677	743	870	833
ENSMUSG00000003429	18286	18023	16693	20189	17617	18758	19645	22630	20307	26652
ENSMUSG00000003435	1296	1654	2883	1988	2476	3318	1879	3996	2734	2432
ENSMUSG00000003436	86	91	102	50	97	98	108	106	82	93
ENSMUSG00000003437	1143	1269	1379	1683	1500	1603	1643	1790	1189	1674
ENSMUSG00000003438	945	1640	1655	1395	1614	1111	1349	1169	1101	1112
ENSMUSG00000003444	948	1073	885	946	876	1049	949	922	1050	874
ENSMUSG00000003452	2911	2601	4128	3307	4091	2527	3662	5437	5093	4774
ENSMUSG00000003458	5158	5305	5500	6398	7222	5078	5382	5867	7436	7868
ENSMUSG00000003464	1172	1511	1525	1669	1652	1658	1730	1844	1856	2226
ENSMUSG00000003469	18	24	19	10	37	24	69	3	5	6
ENSMUSG00000003476	26	18	6	24	13	29	24	17	12	22
ENSMUSG00000003477	6	3	4	5	3	14	12	7	5	5
ENSMUSG00000003484	11	17	31	13	51	19	45	3	2	5
ENSMUSG00000003500	240	255	290	282	316	262	210	151	251	202
ENSMUSG00000003505	9	5	15	3	9	11	14	13	23	11
ENSMUSG00000003518	576	808	717	960	1083	734	951	1384	642	826
ENSMUSG00000003526	483	556	605	424	636	684	745	481	788	603
ENSMUSG00000003527	642	1034	1284	1198	950	906	874	1371	1247	1267
ENSMUSG00000003528	439	364	677	338	379	481	331	424	504	337
ENSMUSG00000003531	858	1147	1094	1133	829	1020	749	873	985	1033
ENSMUSG00000003534	280	507	739	687	549	787	580	800	640	753
ENSMUSG00000003541	256	295	173	304	266	310	197	214	333	237
ENSMUSG00000003545	157	156	135	114	51	59	81	53	103	74
ENSMUSG00000003546	270	309	429	376	195	296	371	419	283	292
ENSMUSG00000003549	584	590	772	709	630	827	447	674	707	706
ENSMUSG00000003555	211	117	102	177	34	430	109	19	64	180
ENSMUSG00000003559	1296	1492	1627	1355	1090	1739	1673	1730	1642	1584
ENSMUSG00000003573	178	222	315	265	233	186	223	196	227	429
ENSMUSG00000003575	257	579	860	838	928	673	822	856	905	672
ENSMUSG00000003581	160	171	204	159	156	195	184	160	135	203
ENSMUSG00000003585	8	5	18	8	7	18	20	16	12	7
ENSMUSG00000003604	1301	1098	1412	1010	984	1022	819	1330	1669	1059
ENSMUSG00000003617	315	272	160	229	203	374	199	236	443	246
ENSMUSG00000003623	3039	2422	3020	2857	2637	2423	2271	3842	3734	3321
ENSMUSG00000003644	271	239	251	566	619	530	249	308	306	407
ENSMUSG00000003657	5	3	13	15	2	5	23	0	26	20
ENSMUSG00000003660	3151	3839	4185	3608	3746	3456	4781	4717	5430	3129
ENSMUSG00000003662	706	709	1125	1034	983	1019	758	700	946	618
ENSMUSG00000003665	20	27	21	29	25	18	13	20	60	25
ENSMUSG00000003680	848	902	1066	802	667	812	862	701	888	1014
ENSMUSG00000003721	722	685	701	993	713	942	1083	992	722	772
ENSMUSG00000003731	867	695	745	677	811	834	898	891	1004	763
ENSMUSG00000003746	530	661	512	434	486	521	467	734	470	480
ENSMUSG00000003752	71	97	61	95	106	164	85	121	104	48
ENSMUSG00000003762	202	319	250	235	289	352	310	302	136	325
ENSMUSG00000003778	3291	2820	2562	3264	4103	3751	3111	4502	3715	5394
ENSMUSG00000003779	2317	2425	2311	2652	2438	3052	2808	3152	3472	3408
ENSMUSG00000003808	1196	983	1180	1196	1170	1219	1009	1085	1706	1678
ENSMUSG00000003809	473	378	738	504	561	484	545	395	457	632
ENSMUSG00000003810	656	912	1094	1026	1101	981	1062	1306	1215	534
ENSMUSG00000003812	262	74	246	155	213	170	203	160	95	134
ENSMUSG00000003813	584	666	611	722	747	758	754	997	817	521
ENSMUSG00000003814	12457	11130	10372	8677	9166	15257	14015	14101	12396	13035
ENSMUSG00000003824	2078	2457	1919	1628	1688	1969	2235	2032	2389	2178
ENSMUSG00000003847	2278	2300	1957	1698	1837	1795	1689	2661	3251	2090
ENSMUSG00000003848	858	937	1055	1146	1542	1398	1015	1044	1176	1683
ENSMUSG00000003849	266	290	350	264	398	323	277	414	482	531
ENSMUSG00000003863	57	68	33	84	11	31	66	73	32	83
ENSMUSG00000003865	499	521	502	484	833	742	559	668	563	628
ENSMUSG00000003868	1148	1566	1619	1722	1792	1806	2072	1877	1402	1970
ENSMUSG00000003872	32	23	58	34	41	48	43	48	37	41
ENSMUSG00000003873	854	1194	1964	2317	2783	1255	1213	1528	1487	1721
ENSMUSG00000003882	41	7	5	10	5	31	35	14	17	3
ENSMUSG00000003923	2063	2332	1978	2123	1891	2458	2366	2683	3015	2693
ENSMUSG00000003929	1022	1002	722	1038	766	954	891	1504	1399	1029
ENSMUSG00000003934	109	80	120	101	71	72	97	79	99	83
ENSMUSG00000003948	481	366	518	537	440	236	402	501	685	465
ENSMUSG00000003949	140	146	345	242	256	118	307	332	327	137
ENSMUSG00000003955	1884	2158	2410	1821	1493	2071	2099	2370	2074	2607
ENSMUSG00000003970	12985	15557	12483	16344	12182	13618	13928	14592	14216	16573
ENSMUSG00000003974	4	12	6	8	12	14	15	9	10	8
ENSMUSG00000003992	2330	2336	2642	2382	2316	2269	2250	3095	2778	2183
ENSMUSG00000004018	864	769	649	874	589	829	596	816	946	1152
ENSMUSG00000004031	197	23	11	16	18	216	47	30	31	17
ENSMUSG00000004032	3074	3033	2278	2601	2199	2254	2278	3110	3027	2822
ENSMUSG00000004035	546	515	762	428	597	567	643	662	434	664
ENSMUSG00000004038	6	4	5	3	6	15	11	8	10	11
ENSMUSG00000004040	2995	4039	6059	3505	2441	4523	3592	4400	4874	3693
ENSMUSG00000004043	123	90	280	283	155	196	240	272	116	343
ENSMUSG00000004044	4028	5217	4451	4768	3600	4903	3788	4529	4816	5136
ENSMUSG00000004054	186	332	326	294	266	317	316	281	312	246
ENSMUSG00000004056	2294	3048	3675	2986	2542	2763	2660	3568	3389	2577
ENSMUSG00000004069	1564	1432	2122	2347	2305	2059	1656	2142	3083	2156
ENSMUSG00000004070	2645	3071	2957	3366	2883	3099	2908	3202	4081	3079
ENSMUSG00000004071	2714	2705	3775	4056	3202	3610	2747	3958	4967	3764
ENSMUSG00000004085	669	971	968	1153	1209	668	754	1292	969	1376
ENSMUSG00000004096	4684	4566	4034	3986	3377	3325	3558	4755	4646	4865
ENSMUSG00000004098	8	27	7	15	9	34	21	13	42	13
ENSMUSG00000004099	5749	4714	3384	4190	5967	4541	3661	4873	5190	6433
ENSMUSG00000004100	838	1083	1516	1142	979	1165	1202	1337	1045	1133
ENSMUSG00000004105	954	1553	1617	1343	1487	1243	772	1151	1627	1320
ENSMUSG00000004110	50	164	85	75	77	116	180	154	117	121
ENSMUSG00000004113	20	39	159	22	26	68	62	40	46	4
ENSMUSG00000004127	563	672	770	610	642	666	780	689	818	576
ENSMUSG00000004151	432	442	547	335	590	391	759	553	280	425
ENSMUSG00000004187	25	87	51	100	25	83	77	77	51	68
ENSMUSG00000004207	4614	6230	7078	6859	7539	5697	7176	7449	7405	6789
ENSMUSG00000004221	1353	1740	1516	1678	3179	2103	1891	2847	2269	1677
ENSMUSG00000004231	8	6	6	7	10	28	23	27	5	17
ENSMUSG00000004233	406	426	249	253	444	531	377	460	392	486
ENSMUSG00000004263	343	397	489	444	471	234	499	376	385	318
ENSMUSG00000004264	1836	2425	3029	2598	2461	1633	1886	1711	2124	2500
ENSMUSG00000004266	10	110	160	99	119	108	75	60	47	103
ENSMUSG00000004267	90	55	110	113	115	154	62	68	158	95
ENSMUSG00000004268	2979	3275	3376	3642	2883	3332	3239	3887	4032	3622
ENSMUSG00000004270	931	1471	1836	1164	1740	1353	1353	903	1261	1384
ENSMUSG00000004285	3387	3308	3339	3735	2682	3419	4085	4038	4118	3516
ENSMUSG00000004296	6	15	3	14	5	11	6	10	8	9
ENSMUSG00000004317	865	1381	1400	1583	1706	1078	1272	1679	1515	1475
ENSMUSG00000004319	2408	2161	2039	2290	1884	2033	1984	2440	2823	2823
ENSMUSG00000004328	69	158	113	164	455	145	179	381	273	184
ENSMUSG00000004341	41	9	11	13	14	11	11	15	27	38
ENSMUSG00000004344	1	10	5	8	1	5	13	4	2	2
ENSMUSG00000004347	326	343	308	313	542	315	410	946	1127	558
ENSMUSG00000004356	944	978	989	1068	933	1079	956	1296	1331	1393
ENSMUSG00000004359	153	106	108	111	176	267	157	129	127	701
ENSMUSG00000004360	16	39	30	34	31	28	58	40	43	19
ENSMUSG00000004364	3324	2618	2608	2284	1669	1939	2387	2579	2724	2230
ENSMUSG00000004366	0	0	1	1	2	2	1	2	0	1
ENSMUSG00000004371	3	7	2	6	8	8	5	7	16	9
ENSMUSG00000004383	920	486	525	585	390	436	480	865	863	394
ENSMUSG00000004393	1619	1623	2017	1720	1923	2180	1614	1933	2389	2216
ENSMUSG00000004394	2507	3244	4437	4118	4366	2957	3928	3829	4112	4304
ENSMUSG00000004415	122	377	156	215	185	222	103	361	144	266
ENSMUSG00000004446	416	455	618	557	449	617	640	472	641	761
ENSMUSG00000004451	2121	2293	3129	2270	2384	2652	2797	2012	2774	3063
ENSMUSG00000004455	3112	2769	2267	2028	1664	1890	1605	2088	2084	3041
ENSMUSG00000004460	2124	1777	2083	1405	1494	1684	1462	2010	1360	1608
ENSMUSG00000004462	624	581	535	791	642	770	727	602	839	835
ENSMUSG00000004473	70	95	86	76	69	83	92	59	107	84
ENSMUSG00000004500	128	277	126	152	233	304	208	241	245	233
ENSMUSG00000004508	1847	1629	1762	1703	1222	1811	1650	2055	2374	1651
ENSMUSG00000004530	1720	1720	1831	1795	1901	1617	1652	1031	2242	2216
ENSMUSG00000004535	10433	8901	10052	8424	9065	8140	8318	10114	10382	12257
ENSMUSG00000004540	102	73	125	117	102	140	239	146	205	60
ENSMUSG00000004542	4	3	3	5	2	12	9	0	10	10
ENSMUSG00000004552	276	42	1	56	31	73	29	28	74	77
ENSMUSG00000004558	550	606	462	782	378	1004	513	458	854	1151
ENSMUSG00000004561	383	408	609	498	271	632	365	574	468	207
ENSMUSG00000004562	672	837	670	741	590	698	629	1078	998	1867
ENSMUSG00000004565	1059	1325	1772	1363	1489	1997	1803	1530	2176	1227
ENSMUSG00000004567	668	685	1198	941	945	1051	1091	900	1227	808
ENSMUSG00000004568	703	437	723	571	595	565	563	666	415	822
ENSMUSG00000004591	1711	1542	1373	1362	1302	1137	1247	1841	1516	1748
ENSMUSG00000004609	28	34	50	97	149	52	80	156	86	28
ENSMUSG00000004610	2911	3361	2823	2974	2784	3245	3074	3331	3082	3284
ENSMUSG00000004612	16	4	0	3	14	6	12	6	16	27
ENSMUSG00000004626	1566	1968	3105	2118	2671	2588	2740	2659	2718	1679
ENSMUSG00000004630	1	10	14	2	1	12	13	25	7	1
ENSMUSG00000004631	2180	1933	2201	2194	2563	1937	2053	2619	2613	2113
ENSMUSG00000004633	665	588	1063	1094	915	678	522	700	687	1040
ENSMUSG00000004637	618	642	875	764	859	753	1047	768	1132	879
ENSMUSG00000004642	6585	7100	7364	7113	7952	6247	5561	5768	7546	9749
ENSMUSG00000004651	41	38	11	12	12	52	39	29	26	25
ENSMUSG00000004654	7	4	6	9	7	16	19	13	7	9
ENSMUSG00000004655	58	22	5	51	3	50	17	12	45	27
ENSMUSG00000004661	238	235	294	198	293	296	329	464	278	366
ENSMUSG00000004665	1385	1622	1602	1460	1217	1157	1210	2860	1420	1894
ENSMUSG00000004667	2669	3283	3389	3658	3077	3257	3019	3903	3769	3195
ENSMUSG00000004668	183	98	61	65	138	125	137	155	105	98
ENSMUSG00000004677	438	683	648	508	494	512	401	762	686	309
ENSMUSG00000004698	198	182	154	137	141	232	237	189	198	219
ENSMUSG00000004707	12	4	4	7	6	10	20	9	11	13
ENSMUSG00000004709	43	13	25	21	27	34	34	28	27	25
ENSMUSG00000004730	185	104	96	85	177	88	101	159	159	11
ENSMUSG00000004748	164	114	220	165	152	202	175	145	129	312
ENSMUSG00000004768	434	643	811	710	894	790	624	775	670	550
ENSMUSG00000004771	6123	8848	8549	7874	7074	6577	6924	7438	9060	8814
ENSMUSG00000004788	496	589	751	641	669	766	646	594	724	861
ENSMUSG00000004789	1817	2095	3212	2652	2683	3149	2414	2700	3389	2499
ENSMUSG00000004791	31	18	9	26	23	40	19	14	37	30
ENSMUSG00000004798	1207	1098	1008	1011	764	1073	882	1459	1190	830
ENSMUSG00000004814	59	24	16	21	8	22	18	10	44	12
ENSMUSG00000004815	190	125	163	189	210	307	184	280	193	174
ENSMUSG00000004821	5	2	0	2	0	6	3	2	3	2
ENSMUSG00000004837	27	38	3	75	36	126	34	85	2	94
ENSMUSG00000004842	13	11	16	14	17	22	24	25	14	15
ENSMUSG00000004843	2017	1660	1661	1637	1615	1343	1535	1473	1955	1886
ENSMUSG00000004846	490	625	931	505	472	552	622	882	495	764
ENSMUSG00000004849	614	888	1281	890	897	818	877	658	942	1021
ENSMUSG00000004864	343	574	618	482	329	451	392	623	475	464
ENSMUSG00000004865	5696	6010	5342	6477	6209	7644	6519	7980	7891	7256
ENSMUSG00000004872	39	15	16	26	29	43	46	37	29	71
ENSMUSG00000004880	3833	3443	3638	4456	3326	3324	2956	2229	4376	3454
ENSMUSG00000004885	26	35	25	27	30	22	33	11	32	30
ENSMUSG00000004891	78	119	65	72	58	222	162	198	206	128
ENSMUSG00000004892	38	54	8	41	18	81	92	19	42	37
ENSMUSG00000004894	4	3	10	5	0	13	11	1	1	4
ENSMUSG00000004895	136	109	162	196	151	160	150	106	147	100
ENSMUSG00000004896	336	396	445	533	255	608	363	244	646	595
ENSMUSG00000004897	1930	2250	2360	2309	1827	2814	2017	2576	2423	2512
ENSMUSG00000004902	227	287	379	340	356	330	280	202	464	430
ENSMUSG00000004929	473	376	556	418	423	312	429	411	440	381
ENSMUSG00000004931	110	166	153	152	94	145	172	151	189	180
ENSMUSG00000004933	89	120	147	88	168	139	201	204	101	84
ENSMUSG00000004934	488	457	413	503	307	517	422	484	432	375
ENSMUSG00000004936	1418	955	1185	1376	1418	1759	1229	1011	1242	2521
ENSMUSG00000004937	1606	2042	2713	1973	1927	2256	2465	2217	3243	2416
ENSMUSG00000004939	5	6	3	6	7	9	15	15	17	15
ENSMUSG00000004945	1103	1107	1159	1319	647	926	982	1155	1037	999
ENSMUSG00000004947	384	608	1095	903	768	984	738	1090	637	760
ENSMUSG00000004948	14095	14406	14145	12406	15938	17249	13325	15235	16490	15733
ENSMUSG00000004951	62	58	48	63	80	84	146	56	81	81
ENSMUSG00000004952	599	546	405	561	890	647	294	358	615	580
ENSMUSG00000004961	86	99	66	37	65	71	167	86	62	69
ENSMUSG00000004980	23188	23623	25459	23023	25424	22162	21580	30939	29794	32437
ENSMUSG00000004988	12	16	23	24	30	38	61	12	18	41
ENSMUSG00000004994	1032	1003	1341	1187	1036	1197	1201	1366	1452	1014
ENSMUSG00000004996	140	147	253	224	344	272	199	189	207	250
ENSMUSG00000005034	2413	2750	2777	2460	2553	2290	1792	2579	3284	2587
ENSMUSG00000005043	122	212	197	355	105	327	405	295	131	205
ENSMUSG00000005045	25	42	8	92	3	110	55	4	6	131
ENSMUSG00000005054	1379	1561	1762	2063	1720	1745	1759	2137	1978	2528
ENSMUSG00000005057	50	25	93	142	203	21	46	18	243	55
ENSMUSG00000005069	742	635	983	861	868	698	693	948	762	831
ENSMUSG00000005078	1535	1506	1705	1790	1249	1841	1388	1291	2085	1288
ENSMUSG00000005087	456	527	579	508	396	474	518	1013	670	500
ENSMUSG00000005089	57	57	32	15	57	74	68	165	44	61
ENSMUSG00000005102	841	745	560	476	487	672	308	374	610	555
ENSMUSG00000005103	3071	4344	4779	4300	4171	4769	5598	4541	4422	4870
ENSMUSG00000005107	7	10	62	29	77	33	41	25	39	39
ENSMUSG00000005124	887	1208	1207	663	1269	680	763	1468	1008	1033
ENSMUSG00000005125	194	353	575	393	652	510	581	743	445	750
ENSMUSG00000005131	648	700	1057	806	825	485	583	914	1204	970
ENSMUSG00000005142	565	810	688	1007	971	660	408	668	1149	1105
ENSMUSG00000005148	134	212	132	155	122	77	248	174	260	146
ENSMUSG00000005150	372	405	400	525	506	525	521	400	507	330
ENSMUSG00000005161	9569	9068	7396	8536	7258	6929	7091	8839	8232	9201
ENSMUSG00000005198	1923	1641	1870	1525	1367	2101	1467	2146	1366	1581
ENSMUSG00000005202	378	304	88	239	217	311	278	180	158	373
ENSMUSG00000005204	1467	1268	1027	1181	1323	1283	1294	1165	1016	1717
ENSMUSG00000005220	47	68	100	94	33	81	52	105	113	56
ENSMUSG00000005225	1570	1175	1013	1309	1065	1214	1189	1190	1672	1853
ENSMUSG00000005232	80	95	161	157	133	187	103	146	487	92
ENSMUSG00000005233	2364	2487	2850	2907	2747	2356	2265	2396	3528	2858
ENSMUSG00000005237	50	94	178	37	161	69	68	36	260	114
ENSMUSG00000005251	204	179	627	669	494	254	184	247	975	464
ENSMUSG00000005262	1564	2068	2251	2546	2456	2334	2234	1568	3276	2689
ENSMUSG00000005267	130	182	189	153	166	279	253	255	217	268
ENSMUSG00000005268	510	717	1162	699	1250	814	410	575	985	1965
ENSMUSG00000005299	545	587	1021	709	813	628	427	626	753	610
ENSMUSG00000005312	1412	1321	1082	1199	1271	991	998	1354	1012	1568
ENSMUSG00000005320	58	33	58	70	106	59	33	74	71	45
ENSMUSG00000005338	23	28	28	27	13	22	53	39	21	14
ENSMUSG00000005339	4	10	1	2	5	21	2	20	8	4
ENSMUSG00000005354	3283	3681	3404	3535	2903	4014	4073	3332	4702	3957
ENSMUSG00000005355	7	13	5	9	35	17	14	8	2	9
ENSMUSG00000005357	106	159	157	261	96	124	203	112	162	116
ENSMUSG00000005360	343	373	425	363	524	465	340	813	625	655
ENSMUSG00000005362	5151	4349	5313	5710	4605	6187	5726	6268	6961	5964
ENSMUSG00000005364	16	15	5	14	16	36	41	16	23	21
ENSMUSG00000005370	1464	1894	2106	1728	1697	1437	1575	1752	2144	1488
ENSMUSG00000005371	2426	2067	2046	1974	1572	1683	1388	2132	2179	2312
ENSMUSG00000005373	72	83	82	91	85	87	190	113	109	123
ENSMUSG00000005374	506	429	514	645	675	869	555	338	713	591
ENSMUSG00000005378	483	647	955	672	1116	547	1121	1173	821	710
ENSMUSG00000005397	8188	9087	11195	8622	8724	9671	10056	11335	11026	10181
ENSMUSG00000005410	1394	1594	1921	1481	1555	1967	1674	2182	1963	2027
ENSMUSG00000005413	925	1481	1306	2095	2148	1294	1381	1398	1980	1524
ENSMUSG00000005417	3175	3112	3619	2737	2522	2810	2685	3959	3116	3097
ENSMUSG00000005442	545	595	603	540	475	450	488	515	692	587
ENSMUSG00000005447	1888	2609	2259	2272	1972	2329	2439	2339	2713	2581
ENSMUSG00000005465	87	54	110	61	65	95	85	39	47	47
ENSMUSG00000005469	675	754	750	632	460	624	507	740	602	586
ENSMUSG00000005470	1431	1924	2271	1698	2027	2393	2502	2163	2204	1563
ENSMUSG00000005474	6	3	2	3	8	15	7	7	7	14
ENSMUSG00000005481	1536	1334	1305	1348	1729	1747	1429	1755	1666	2495
ENSMUSG00000005483	1294	1241	1582	1443	1720	1362	951	1352	1568	2024
ENSMUSG00000005493	480	510	332	441	460	421	490	347	539	372
ENSMUSG00000005501	1543	1665	1289	1663	1726	1606	1247	2545	2421	2274
ENSMUSG00000005503	49	10	11	20	13	21	14	17	23	26
ENSMUSG00000005505	561	719	741	809	985	1011	700	1067	994	713
ENSMUSG00000005506	2403	2648	2307	2275	3644	1560	2121	3267	2374	2530
ENSMUSG00000005510	3060	3006	2931	3004	2437	2519	2374	2861	3244	3695
ENSMUSG00000005514	388	643	739	633	569	755	635	622	775	406
ENSMUSG00000005533	5621	5806	4565	5277	3906	4200	4651	5205	5554	7304
ENSMUSG00000005534	1368	1325	1088	971	707	1130	1032	1050	1063	1563
ENSMUSG00000005540	11	16	17	10	15	29	23	24	17	12
ENSMUSG00000005547	1	3	1	2	7	6	16	7	9	2
ENSMUSG00000005553	376	646	770	567	576	896	735	729	853	201
ENSMUSG00000005566	3061	3073	2518	2715	1891	2440	1867	2027	2473	2727
ENSMUSG00000005575	274	374	396	288	280	395	320	333	305	448
ENSMUSG00000005580	341	537	444	335	294	445	409	355	536	478
ENSMUSG00000005583	1059	1221	949	860	1799	1565	1772	1737	748	1171
ENSMUSG00000005609	1330	1441	1781	1495	1556	2036	1915	2208	1945	2091
ENSMUSG00000005610	28236	26285	32240	32541	32272	33269	31420	37587	39941	35271
ENSMUSG00000005611	192	295	192	264	136	226	225	298	273	214
ENSMUSG00000005615	980	794	1382	800	942	1655	882	1158	910	1000
ENSMUSG00000005621	1060	741	1409	969	943	1107	767	1485	1106	975
ENSMUSG00000005625	4169	4524	6362	5405	5824	7032	6051	5820	5987	6484
ENSMUSG00000005628	47	14	9	17	6	25	55	93	3	8
ENSMUSG00000005640	36	143	107	73	142	109	199	128	372	167
ENSMUSG00000005649	11	9	9	8	30	19	18	28	19	15
ENSMUSG00000005656	7475	9512	9440	9012	7258	9248	9937	9116	9640	8738
ENSMUSG00000005667	574	758	1112	935	1217	839	768	898	811	1043
ENSMUSG00000005672	5754	6917	8854	8185	7913	9293	8841	10201	10852	6476
ENSMUSG00000005674	255	298	236	267	222	221	315	271	300	363
ENSMUSG00000005677	8	11	52	14	15	14	19	28	14	58
ENSMUSG00000005681	1	4	1	1	0	7	2	3	3	0
ENSMUSG00000005682	1287	1097	1181	1039	1271	1334	1052	1408	1702	1276
ENSMUSG00000005683	2964	3636	3691	3937	3686	4367	4006	4508	4546	4649
ENSMUSG00000005686	216	309	493	526	400	641	440	138	341	739
ENSMUSG00000005687	3654	3848	3645	3884	3565	2720	3803	4224	4229	3852
ENSMUSG00000005696	14	12	10	12	67	36	34	19	7	20
ENSMUSG00000005698	2221	1927	1646	1770	1792	2937	1963	3170	2076	2626
ENSMUSG00000005699	319	335	323	289	364	369	265	302	233	285
ENSMUSG00000005705	13	20	18	9	21	26	12	35	28	2
ENSMUSG00000005716	3	0	2	1	0	6	7	3	2	4
ENSMUSG00000005718	551	525	615	492	489	469	615	640	580	502
ENSMUSG00000005732	5061	6397	5081	4921	4462	3923	3908	4383	4649	6972
ENSMUSG00000005763	40	33	41	12	13	35	38	22	28	28
ENSMUSG00000005774	582	431	473	511	414	458	338	436	337	485
ENSMUSG00000005779	2390	2251	1972	2091	2010	2295	1587	2027	2114	2860
ENSMUSG00000005800	5	50	4	11	6	15	12	9	3	4
ENSMUSG00000005802	1259	947	797	971	751	1075	884	1169	1174	1321
ENSMUSG00000005803	392	308	349	273	277	415	379	356	494	398
ENSMUSG00000005804	801	904	1078	864	921	996	979	914	1191	1262
ENSMUSG00000005813	1099	1213	1464	1150	1243	1475	668	996	1092	1417
ENSMUSG00000005823	909	962	1444	1174	1245	1200	988	941	1403	1127
ENSMUSG00000005824	9	8	29	11	6	25	11	1	3	5
ENSMUSG00000005836	2947	2594	1751	1941	1795	1880	1796	2214	2266	2423
ENSMUSG00000005846	9161	8089	6204	7657	6896	7820	8112	8150	8722	8712
ENSMUSG00000005864	54	10	17	7	11	40	29	6	9	9
ENSMUSG00000005871	1416	1432	1395	1312	2821	1503	1291	2496	1409	2160
ENSMUSG00000005873	2295	2636	2822	2927	2783	3193	2929	3006	3500	3167
ENSMUSG00000005881	4254	5340	6054	5624	4975	5813	6205	6417	6777	5100
ENSMUSG00000005882	698	555	532	780	722	924	820	1089	512	747
ENSMUSG00000005883	9	33	60	28	25	53	21	36	98	4
ENSMUSG00000005886	1574	1714	2007	1222	931	1633	1844	1728	1513	1329
ENSMUSG00000005891	3	5	2	0	0	2	3	2	1	1
ENSMUSG00000005892	20	11	16	21	25	35	4	17	17	26
ENSMUSG00000005893	1927	1867	1483	1416	1993	1505	1475	2125	2242	2137
ENSMUSG00000005897	526	622	416	488	535	467	570	701	912	538
ENSMUSG00000005899	1067	926	958	1086	983	857	861	1106	1226	1005
ENSMUSG00000005907	1295	433	1809	1489	1440	1077	698	709	1939	1114
ENSMUSG00000005917	29	38	10	26	53	61	34	23	11	81
ENSMUSG00000005936	1416	1921	2015	2285	2237	2086	1696	2015	2422	2715
ENSMUSG00000005947	20	24	27	11	12	19	35	21	25	55
ENSMUSG00000005949	646	430	728	815	501	710	422	774	843	558
ENSMUSG00000005950	18	14	4	8	4	26	11	10	4	7
ENSMUSG00000005951	48	80	73	40	34	13	55	61	54	16
ENSMUSG00000005952	2	18	9	12	9	49	18	11	10	11
ENSMUSG00000005958	31	45	37	72	85	50	104	84	48	136
ENSMUSG00000005968	260	241	309	432	635	221	245	465	440	704
ENSMUSG00000005973	2224	2136	2572	1821	2499	1819	1692	2100	2941	3437
ENSMUSG00000005980	47	77	168	78	80	46	107	68	52	128
ENSMUSG00000005981	2990	4048	4874	4618	4743	4211	4697	4499	4727	3864
ENSMUSG00000005982	859	791	1154	1250	982	873	1058	1546	1154	965
ENSMUSG00000005983	61	76	66	72	76	91	86	78	79	33
ENSMUSG00000005986	74	87	77	70	52	66	59	30	72	27
ENSMUSG00000005994	14	8	21	6	10	13	12	5	16	4
ENSMUSG00000006005	6901	8289	8509	7002	5631	7885	6289	8626	9943	10619
ENSMUSG00000006007	26	11	11	14	10	19	55	15	72	20
ENSMUSG00000006010	1598	1950	2358	1521	1523	2044	1946	2428	2461	2869
ENSMUSG00000006014	62	107	35	116	210	114	29	129	59	151
ENSMUSG00000006019	146	199	166	151	266	245	318	220	215	208
ENSMUSG00000006021	273	210	242	207	465	206	275	365	396	352
ENSMUSG00000006024	3072	4219	5342	5157	5188	4143	4889	5452	5189	4547
ENSMUSG00000006050	2357	2211	1998	2110	1589	1837	2120	2455	2390	2293
ENSMUSG00000006056	0	2	3	1	5	1	10	2	5	7
ENSMUSG00000006057	2683	3213	1871	1503	2228	2520	2297	2439	2740	2694
ENSMUSG00000006058	597	681	606	698	859	1084	903	1303	773	2210
ENSMUSG00000006095	2244	2734	2881	2733	2217	2828	3027	3232	2767	2798
ENSMUSG00000006127	1284	1520	1645	1590	1306	1295	1519	1741	1949	1536
ENSMUSG00000006134	429	387	698	551	510	563	310	484	778	765
ENSMUSG00000006143	17	22	7	11	0	4	5	24	3	13
ENSMUSG00000006154	24	34	7	15	11	52	114	20	55	7
ENSMUSG00000006169	1549	1327	1335	1315	986	1324	1665	2192	1919	1980
ENSMUSG00000006179	11	13	26	7	19	19	17	6	19	18
ENSMUSG00000006191	1492	1237	1531	1157	1120	1288	1473	2020	1821	1975
ENSMUSG00000006200	23	10	21	11	31	16	17	9	9	10
ENSMUSG00000006204	15	8	26	12	19	37	28	48	19	25
ENSMUSG00000006205	2805	3001	2744	2488	2054	2904	2611	2348	2870	2946
ENSMUSG00000006215	200	375	375	289	311	459	237	338	479	246
ENSMUSG00000006216	5	6	8	4	0	16	11	0	11	3
ENSMUSG00000006218	4	3	6	2	4	7	7	4	6	5
ENSMUSG00000006219	586	718	680	621	751	441	612	808	1080	763
ENSMUSG00000006221	42	32	27	21	29	58	47	27	55	14
ENSMUSG00000006235	18	28	33	26	32	25	40	26	34	7
ENSMUSG00000006241	28	22	21	45	13	80	47	57	56	61
ENSMUSG00000006262	1628	1578	1440	1573	2209	2157	1744	2020	1996	1885
ENSMUSG00000006269	67	22	29	39	45	93	211	48	81	63
ENSMUSG00000006270	1	0	1	1	15	11	5	16	0	0
ENSMUSG00000006273	3095	3092	3447	2717	2608	2667	3140	2888	3058	3121
ENSMUSG00000006276	1581	1793	1680	2022	1722	1876	1285	1934	2269	1956
ENSMUSG00000006281	1190	1251	1439	1267	677	1223	1362	1293	1302	1086
ENSMUSG00000006288	2263	2983	3412	3682	3337	3854	3367	3803	4559	2541
ENSMUSG00000006289	1519	1626	1455	1442	1392	1292	1400	1859	1674	1724
ENSMUSG00000006299	2296	3641	3720	3885	3923	4151	3901	5067	3775	3559
ENSMUSG00000006301	703	928	978	1011	1275	1354	1086	751	928	1445
ENSMUSG00000006304	4678	5059	4814	4906	4066	4981	4453	6064	5350	5277
ENSMUSG00000006307	311	483	603	505	456	429	416	546	667	560
ENSMUSG00000006310	51	41	77	61	34	103	47	96	100	56
ENSMUSG00000006311	9	1	0	2	2	5	9	2	1	3
ENSMUSG00000006313	24	35	87	123	65	61	70	142	135	48
ENSMUSG00000006315	1487	1698	1471	1520	1357	1726	1508	1644	1642	1390
ENSMUSG00000006333	17326	20895	17964	22875	18166	20763	18702	17896	18282	22226
ENSMUSG00000006335	316	370	287	340	393	508	450	355	347	188
ENSMUSG00000006342	54	78	125	84	122	63	57	107	138	120
ENSMUSG00000006344	348	306	588	423	433	461	368	380	340	375
ENSMUSG00000006345	16	15	4	5	4	10	23	28	5	18
ENSMUSG00000006356	368	522	425	912	690	1035	452	988	926	534
ENSMUSG00000006360	360	379	152	330	226	354	160	250	371	313
ENSMUSG00000006362	520	439	373	426	361	415	321	526	389	525
ENSMUSG00000006369	936	1117	1310	1143	1044	1463	1055	1129	1791	1962
ENSMUSG00000006373	9084	8631	10861	9153	10408	11088	9701	10406	10759	11085
ENSMUSG00000006378	413	433	499	553	419	557	585	713	904	550
ENSMUSG00000006386	451	338	370	368	584	516	240	372	368	502
ENSMUSG00000006389	3	7	4	5	7	12	16	11	3	7
ENSMUSG00000006390	1159	1206	909	1307	1435	1387	1227	1351	1621	1217
ENSMUSG00000006392	1792	1973	1988	2278	2110	2254	2541	1830	2444	2358
ENSMUSG00000006395	166	139	199	163	109	139	112	95	220	123
ENSMUSG00000006398	618	774	778	951	905	679	324	340	716	919
ENSMUSG00000006403	42	75	73	56	69	95	59	73	201	123
ENSMUSG00000006411	11	21	32	34	69	19	13	10	51	25
ENSMUSG00000006412	887	1242	1518	1371	1217	1746	1365	1627	1438	1329
ENSMUSG00000006418	3791	4365	4987	4577	4214	6020	5097	5468	5785	4830
ENSMUSG00000006423	1744	1158	925	1227	1293	1275	1166	2021	1456	1090
ENSMUSG00000006435	48	96	41	70	33	47	130	61	38	48
ENSMUSG00000006442	238	332	245	291	211	259	170	240	240	374
ENSMUSG00000006445	65	46	105	100	79	113	137	67	132	122
ENSMUSG00000006456	467	856	1031	856	962	770	693	874	1071	676
ENSMUSG00000006457	219	275	312	217	282	291	239	240	162	197
ENSMUSG00000006462	13	10	13	18	16	30	33	19	20	24
ENSMUSG00000006463	461	417	377	393	400	599	656	574	444	535
ENSMUSG00000006464	73	83	73	101	62	157	143	172	96	131
ENSMUSG00000006469	4	6	0	0	2	8	8	3	1	6
ENSMUSG00000006471	175	271	191	232	314	212	164	261	296	253
ENSMUSG00000006476	331	504	467	353	327	293	371	311	396	353
ENSMUSG00000006488	4	1	1	3	4	14	29	4	7	1
ENSMUSG00000006490	0	3	1	2	0	2	8	1	0	5
ENSMUSG00000006494	866	1061	1040	884	1357	1079	973	934	1517	784
ENSMUSG00000006498	1690	2115	2755	2749	2857	2747	2178	2112	2160	2568
ENSMUSG00000006517	287	231	290	296	326	398	335	240	436	273
ENSMUSG00000006519	667	835	730	655	729	882	656	925	662	654
ENSMUSG00000006522	33	32	18	28	35	31	51	41	75	56
ENSMUSG00000006526	193	237	148	326	289	236	170	176	288	155
ENSMUSG00000006527	1636	1130	1346	1149	786	1449	1039	1251	1838	1418
ENSMUSG00000006529	18	15	6	3	3	32	19	7	7	13
ENSMUSG00000006538	99	23	49	37	31	108	34	5	18	131
ENSMUSG00000006542	14	13	6	5	9	32	19	33	38	8
ENSMUSG00000006546	6	2	0	0	2	2	4	0	1	0
ENSMUSG00000006567	106	111	140	84	48	170	259	243	186	162
ENSMUSG00000006570	0	2	0	0	0	3	2	0	0	1
ENSMUSG00000006574	227	18	13	117	144	93	88	12	61	93
ENSMUSG00000006575	5	35	10	6	8	18	76	8	6	13
ENSMUSG00000006576	215	359	388	293	481	311	255	292	301	335
ENSMUSG00000006585	433	396	452	444	460	479	448	538	461	488
ENSMUSG00000006586	680	527	815	691	617	987	589	1354	512	799
ENSMUSG00000006587	161	144	239	267	338	123	231	352	316	159
ENSMUSG00000006589	1211	1258	1123	1631	1198	1367	1002	1596	1511	1409
ENSMUSG00000006599	1383	1332	1504	1544	1219	1297	957	1043	1439	1716
ENSMUSG00000006611	741	609	766	413	678	554	433	437	1527	970
ENSMUSG00000006638	171	107	254	159	211	144	103	125	50	164
ENSMUSG00000006641	151	236	1143	380	874	645	731	636	330	414
ENSMUSG00000006642	113	86	102	89	124	100	210	150	243	128
ENSMUSG00000006649	17	8	11	16	19	31	25	34	10	29
ENSMUSG00000006651	66	53	53	27	126	64	59	83	97	34
ENSMUSG00000006673	4165	4979	5633	5198	4267	4811	4721	5799	6382	4658
ENSMUSG00000006675	135	150	169	133	126	90	130	99	220	157
ENSMUSG00000006676	1273	1062	1016	913	1093	854	1001	906	909	1283
ENSMUSG00000006678	1419	1280	920	822	1002	1184	1196	2086	1368	2286
ENSMUSG00000006699	19033	20471	19800	20061	18819	16611	18000	24986	23467	21273
ENSMUSG00000006705	666	738	1538	1874	2083	371	2230	2256	506	3037
ENSMUSG00000006711	8	7	37	26	36	24	33	31	50	2
ENSMUSG00000006715	1604	1399	857	1499	1295	1220	1399	1793	1033	1896
ENSMUSG00000006717	1176	1108	278	1375	1288	1472	1406	1466	307	1270
ENSMUSG00000006720	603	655	1139	708	1049	840	700	794	918	477
ENSMUSG00000006724	6	3	13	7	8	7	22	1	4	25
ENSMUSG00000006728	7115	7423	7050	6922	6679	7616	6729	7672	8467	8100
ENSMUSG00000006731	4	21	15	11	28	9	18	6	6	21
ENSMUSG00000006732	884	980	736	809	718	965	984	961	972	1288
ENSMUSG00000006736	1536	2162	2138	2300	3075	1739	3936	3745	2705	2373
ENSMUSG00000006740	6252	6588	5195	5042	5374	4442	4276	5713	5539	9046
ENSMUSG00000006763	830	748	864	632	907	928	554	731	549	667
ENSMUSG00000006764	102	204	220	163	101	147	70	206	241	165
ENSMUSG00000006777	14	30	8	7	2	11	7	19	24	6
ENSMUSG00000006782	246	313	544	263	340	500	254	343	456	400
ENSMUSG00000006784	39	33	41	65	63	79	64	69	38	74
ENSMUSG00000006800	4411	4812	5028	4090	4308	4718	3952	5477	5314	5482
ENSMUSG00000006818	2242	2045	2238	2388	2251	2059	2121	2259	2301	2214
ENSMUSG00000006850	80	110	149	106	65	91	68	74	76	106
ENSMUSG00000006906	1189	1160	1015	1604	900	875	1138	1348	1171	1571
ENSMUSG00000006920	2217	2410	3249	2656	2235	3109	2884	2915	3881	2525
ENSMUSG00000006930	141	89	115	62	106	91	93	77	81	93
ENSMUSG00000006931	473	471	495	412	340	406	295	279	463	569
ENSMUSG00000006932	5582	5978	5829	5557	5218	5220	4476	5505	5192	5106
ENSMUSG00000006941	2801	3022	3490	3350	2870	3128	3451	3700	3990	3134
ENSMUSG00000006948	4	2	0	2	3	4	5	5	4	4
ENSMUSG00000006958	36	38	59	27	65	41	33	40	89	43
ENSMUSG00000006998	5391	5699	8573	6910	7424	8659	8164	9208	9173	8280
ENSMUSG00000007021	137	78	74	164	97	172	168	86	67	173
ENSMUSG00000007029	280	513	669	426	307	422	508	663	328	304
ENSMUSG00000007030	97	102	167	83	102	170	116	168	90	116
ENSMUSG00000007033	13	8	19	15	2	21	17	3	42	0
ENSMUSG00000007034	11	23	38	18	13	64	52	35	35	41
ENSMUSG00000007035	81	135	124	135	84	125	246	81	140	212
ENSMUSG00000007036	589	823	987	805	577	840	765	698	792	637
ENSMUSG00000007038	279	191	307	251	329	274	165	192	191	295
ENSMUSG00000007039	1124	2158	2143	1871	1888	1708	1716	1721	3144	1758
ENSMUSG00000007041	2397	3063	3218	2926	3343	3181	2970	3088	3297	2836
ENSMUSG00000007050	1127	1214	1998	1317	1744	1414	1824	2425	1769	1926
ENSMUSG00000007080	1669	1774	1113	1065	998	1359	1399	1954	1813	1103
ENSMUSG00000007097	205	310	230	233	295	562	297	193	272	169
ENSMUSG00000007107	17	6	27	48	8	27	82	6	3	17
ENSMUSG00000007122	21	24	6	32	13	9	14	16	16	8
ENSMUSG00000007207	303	286	373	327	272	371	411	396	515	333
ENSMUSG00000007209	1	6	3	3	2	7	5	12	1	3
ENSMUSG00000007216	117	213	259	242	261	142	246	396	238	160
ENSMUSG00000007279	211	175	303	222	258	154	183	406	282	277
ENSMUSG00000007338	1203	1140	1156	1303	1191	1334	960	1337	1479	1275
ENSMUSG00000007379	151	194	271	365	557	158	190	243	251	353
ENSMUSG00000007411	2127	2344	1913	2106	1608	3076	2649	3328	3129	3857
ENSMUSG00000007415	1937	2020	1633	1766	1586	2179	2027	2111	2439	2846
ENSMUSG00000007440	71	42	44	31	48	73	34	62	83	42
ENSMUSG00000007457	21	29	12	22	15	46	30	33	62	12
ENSMUSG00000007458	2930	2660	2789	2766	2406	4708	3303	3476	3700	3754
ENSMUSG00000007476	2038	2508	2935	2223	3031	3210	2863	3527	4047	4153
ENSMUSG00000007480	1	7	3	7	3	9	7	5	10	5
ENSMUSG00000007564	2940	4128	5365	4312	5394	5087	3855	4675	5033	4640
ENSMUSG00000007570	151	75	206	205	173	100	106	120	244	240
ENSMUSG00000007589	2048	2270	2823	1920	2473	2450	2775	1849	2247	2405
ENSMUSG00000007591	5	19	9	7	2	31	22	4	10	29
ENSMUSG00000007594	3	5	7	80	151	14	6	6	2	202
ENSMUSG00000007603	469	517	624	644	487	657	730	662	574	546
ENSMUSG00000007610	121	135	157	111	100	81	146	175	119	136
ENSMUSG00000007613	2943	2676	2546	2833	2571	2461	2095	2397	2947	2881
ENSMUSG00000007617	575	462	640	540	275	627	412	208	717	420
ENSMUSG00000007646	312	436	564	481	452	589	656	674	627	748
ENSMUSG00000007653	86	54	4	27	69	25	32	33	68	24
ENSMUSG00000007655	1385	1574	1113	1546	2148	1385	1000	1222	1870	1459
ENSMUSG00000007656	5790	5251	5220	5601	4661	6187	5671	5971	5993	6278
ENSMUSG00000007659	1479	1368	1971	1607	2164	1222	1018	1609	1951	1784
ENSMUSG00000007670	2075	2027	1283	1304	1057	1660	1510	2557	1943	2891
ENSMUSG00000007682	69	56	16	36	13	59	71	38	39	164
ENSMUSG00000007721	764	1288	1485	1059	919	1464	1628	1039	1463	1293
ENSMUSG00000007739	8887	9631	9683	8634	8142	7186	6952	8160	8226	10067
ENSMUSG00000007777	1776	1539	1304	1670	1253	1416	1369	1890	1825	1989
ENSMUSG00000007783	167	300	417	329	857	305	275	449	323	280
ENSMUSG00000007805	59	85	80	68	75	103	36	32	46	88
ENSMUSG00000007812	5023	5874	5217	5129	3818	4316	5428	7606	5723	5381
ENSMUSG00000007815	5241	5857	6259	5044	6139	6925	6783	5851	5752	6656
ENSMUSG00000007817	1682	1783	1625	1608	1675	1558	1939	2279	1890	2564
ENSMUSG00000007827	884	1461	1553	1875	1886	1499	1824	1476	1299	1992
ENSMUSG00000007833	223	295	763	455	145	253	364	380	276	464
ENSMUSG00000007836	2898	2116	1890	2178	1820	2392	1901	3065	1179	3183
ENSMUSG00000007837	178	178	235	199	179	300	175	383	93	135
ENSMUSG00000007850	6435	8606	6257	8773	8046	6507	5540	5839	8679	7848
ENSMUSG00000007867	1636	2131	2131	1787	1358	1494	2008	2380	2165	2022
ENSMUSG00000007872	3264	3063	2164	4216	2407	3805	2605	2778	4177	5294
ENSMUSG00000007877	0	11	4	11	2	2	3	26	6	1
ENSMUSG00000007880	3277	2740	2746	2894	3604	3176	2770	3828	3907	3577
ENSMUSG00000007888	34	26	60	12	32	20	42	12	31	20
ENSMUSG00000007891	5959	7095	7364	7866	7481	7358	7709	7962	8794	6624
ENSMUSG00000007892	9712	10390	8224	10022	10326	8373	5873	7455	8230	9411
ENSMUSG00000007907	14	8	8	13	19	28	37	37	15	12
ENSMUSG00000007908	161	221	293	147	167	227	268	307	210	186
ENSMUSG00000007944	3	0	0	1	2	7	20	8	0	5
ENSMUSG00000007946	16	4	5	2	2	8	3	2	2	2
ENSMUSG00000007950	122	139	194	150	212	122	96	90	110	118
ENSMUSG00000007987	995	1035	1008	895	896	953	1205	1053	1204	991
ENSMUSG00000007989	2400	2241	3440	2497	2261	2176	2682	3734	4489	3409
ENSMUSG00000008028	19	28	5	15	26	38	35	12	22	27
ENSMUSG00000008035	1683	1238	2342	1519	1401	2535	1223	1311	1316	1856
ENSMUSG00000008036	1008	1332	940	979	884	750	956	888	896	863
ENSMUSG00000008090	332	372	276	310	256	215	202	239	281	338
ENSMUSG00000008129	308	382	521	369	490	479	552	533	273	355
ENSMUSG00000008136	833	1017	867	708	666	763	729	663	418	811
ENSMUSG00000008140	357	450	425	337	380	309	287	218	312	245
ENSMUSG00000008153	46	30	38	45	37	86	185	119	8	126
ENSMUSG00000008167	313	445	702	557	761	306	395	369	631	481
ENSMUSG00000008193	8	3	9	11	3	25	20	14	7	14
ENSMUSG00000008200	2297	1607	1763	1698	1856	1349	1610	2716	2839	2613
ENSMUSG00000008206	1788	2371	2484	2686	2916	1874	2149	2587	2703	2144
ENSMUSG00000008226	774	745	682	561	812	755	890	751	637	888
ENSMUSG00000008301	2313	2275	2463	2326	2418	2271	1940	2616	1953	2916
ENSMUSG00000008305	809	709	490	768	397	695	546	988	771	826
ENSMUSG00000008307	156	110	122	102	91	120	122	172	154	112
ENSMUSG00000008318	48	63	108	48	77	79	132	36	64	46
ENSMUSG00000008333	3092	2837	2128	2908	1862	2407	2284	2582	2713	3324
ENSMUSG00000008348	36323	52287	73091	45483	50216	31257	50045	85616	56485	50544
ENSMUSG00000008373	1531	1662	1782	1684	1845	2928	2865	2413	2155	1931
ENSMUSG00000008384	260	395	338	435	482	378	454	467	427	391
ENSMUSG00000008393	2570	2828	2861	3795	3340	2850	2632	3006	3973	4197
ENSMUSG00000008398	316	618	250	445	427	335	314	774	522	305
ENSMUSG00000008429	1229	903	926	969	634	904	886	837	950	759
ENSMUSG00000008435	745	521	799	898	700	1467	1375	1315	1098	1403
ENSMUSG00000008438	12	9	6	12	9	17	19	13	16	15
ENSMUSG00000008450	1753	1322	828	990	758	709	619	560	1565	918
ENSMUSG00000008461	6	7	2	4	7	8	32	4	15	12
ENSMUSG00000008475	4435	4863	4613	4349	4232	3546	3645	3189	4100	5390
ENSMUSG00000008482	3	2	1	9	14	6	2	2	1	5
ENSMUSG00000008489	5927	6526	8285	6101	6675	5821	7858	8244	9069	7630
ENSMUSG00000008496	113	141	140	86	97	164	246	72	89	109
ENSMUSG00000008540	11702	8857	10587	9657	7432	7179	7254	9556	11189	11906
ENSMUSG00000008575	3476	4113	3488	3261	2982	2872	2521	4050	4200	3233
ENSMUSG00000008590	11	3	17	25	5	16	22	12	12	29
ENSMUSG00000008601	165	237	261	174	203	234	353	256	378	105
ENSMUSG00000008604	604	726	746	986	667	771	606	709	642	829
ENSMUSG00000008658	131	88	146	78	95	231	74	101	172	339
ENSMUSG00000008668	7714	7256	4661	6394	4624	10027	9055	10930	6773	14688
ENSMUSG00000008682	3803	4038	3544	3949	3711	6535	5222	4911	4283	4690
ENSMUSG00000008683	5365	5236	4444	5761	4484	6211	6060	7082	5983	8715
ENSMUSG00000008690	2084	2178	2431	2745	2351	2888	2485	2932	2601	2498
ENSMUSG00000008730	2070	2007	1863	1478	1841	1938	1396	1780	2390	3059
ENSMUSG00000008734	181	206	144	134	192	204	119	121	71	70
ENSMUSG00000008763	2362	1685	897	1205	1806	1951	1733	956	2003	2769
ENSMUSG00000008789	10	12	10	8	72	19	29	11	6	8
ENSMUSG00000008813	3	2	3	1	6	5	4	6	1	2
ENSMUSG00000008822	702	652	566	531	449	511	639	537	769	608
ENSMUSG00000008843	45	6	3	8	3	8	7	5	8	7
ENSMUSG00000008845	21	48	9	68	11	58	25	20	34	23
ENSMUSG00000008855	163	248	267	237	182	304	214	292	312	147
ENSMUSG00000008859	592	629	676	720	412	893	534	380	440	1826
ENSMUSG00000008874	1	1	0	1	3	0	3	0	1	1
ENSMUSG00000008892	16313	16001	15333	14716	12403	14398	15613	18713	19208	16769
ENSMUSG00000008932	8	8	12	10	6	23	26	9	8	15
ENSMUSG00000008958	1521	2120	2454	2072	2038	1962	2910	2374	2296	2898
ENSMUSG00000008976	2050	1898	1808	1524	1657	1789	1842	2071	2413	2158
ENSMUSG00000008999	438	460	552	406	221	254	244	264	358	326
ENSMUSG00000009013	17994	16975	16919	16934	11233	15076	15913	18501	19439	18476
ENSMUSG00000009030	1905	1886	1724	1718	1477	1300	1455	2507	2807	2631
ENSMUSG00000009035	459	413	731	537	328	325	258	405	640	368
ENSMUSG00000009047	1	1	0	0	0	2	0	2	1	0
ENSMUSG00000009070	5	4	4	10	4	17	24	10	6	4
ENSMUSG00000009073	792	686	792	809	528	804	701	620	865	930
ENSMUSG00000009075	6	1	1	6	5	12	12	6	8	3
ENSMUSG00000009076	498	593	652	616	615	653	724	644	737	610
ENSMUSG00000009079	3061	3208	4045	3865	4403	3645	2779	4330	2394	3268
ENSMUSG00000009090	1334	1962	2002	1959	2283	1784	1610	2675	1960	2824
ENSMUSG00000009092	806	775	918	634	738	818	1093	707	980	1008
ENSMUSG00000009093	1	1	2	1	1	2	3	0	0	16
ENSMUSG00000009097	3	2	2	6	3	8	2	4	10	4
ENSMUSG00000009108	5	12	18	32	15	19	40	10	28	19
ENSMUSG00000009112	824	711	646	531	711	593	776	670	612	929
ENSMUSG00000009114	22	5	3	0	3	11	10	4	2	1
ENSMUSG00000009115	1	1	3	2	0	5	3	1	2	1
ENSMUSG00000009145	34	38	36	47	33	47	37	79	49	62
ENSMUSG00000009185	1	4	0	5	1	1	0	0	0	6
ENSMUSG00000009207	1609	1410	1541	1368	1562	1445	1684	2002	1760	2168
ENSMUSG00000009210	0	6	7	5	1	4	5	6	3	5
ENSMUSG00000009214	14	4	16	5	6	13	14	9	3	1
ENSMUSG00000009216	10	10	3	13	8	10	7	8	26	10
ENSMUSG00000009246	232	224	452	232	311	225	213	411	400	251
ENSMUSG00000009248	44	49	101	115	119	31	68	43	74	79
ENSMUSG00000009281	1460	1799	1218	1417	1134	1017	1048	2109	1706	1741
ENSMUSG00000009291	5356	7054	7853	7425	7410	7236	6552	7059	7364	6784
ENSMUSG00000009292	24	41	38	81	86	85	46	70	61	68
ENSMUSG00000009293	668	530	745	588	766	944	548	825	547	760
ENSMUSG00000009350	72	4	3	3	9	6	21	4	7	10
ENSMUSG00000009356	23	20	1	10	4	36	65	2	22	2
ENSMUSG00000009376	85	74	57	39	74	47	56	37	43	42
ENSMUSG00000009378	13	16	9	9	23	22	21	58	33	5
ENSMUSG00000009394	37	59	34	24	17	71	71	52	37	33
ENSMUSG00000009406	284	337	237	222	237	210	343	327	314	301
ENSMUSG00000009418	814	1279	1598	1092	1121	2028	970	1710	1926	921
ENSMUSG00000009470	4631	3531	3829	4293	3198	3340	3791	5132	4890	4367
ENSMUSG00000009471	1	1	43	60	56	9	14	4	7	21
ENSMUSG00000009487	19	13	25	13	19	33	35	30	55	18
ENSMUSG00000009535	1615	1761	2244	2326	2041	2195	2236	2221	2521	2433
ENSMUSG00000009545	440	618	365	218	652	297	419	178	486	549
ENSMUSG00000009549	4652	4941	4778	4766	3488	4230	4906	5755	5673	4937
ENSMUSG00000009551	6	2	7	6	6	10	7	11	9	14
ENSMUSG00000009555	510	519	1116	667	598	581	516	581	937	935
ENSMUSG00000009563	294	425	482	421	479	615	198	402	247	565
ENSMUSG00000009566	474	210	133	383	647	332	331	375	292	359
ENSMUSG00000009569	1306	1595	1773	1560	1985	1412	1858	2365	1951	2027
ENSMUSG00000009575	6046	5338	5578	4557	5063	6179	5898	6303	6251	6441
ENSMUSG00000009580	5	5	6	4	1	7	8	7	6	4
ENSMUSG00000009585	714	694	527	889	880	888	598	835	634	1080
ENSMUSG00000009588	5	6	7	4	4	7	5	6	5	0
ENSMUSG00000009596	68	61	64	50	45	112	74	105	101	5
ENSMUSG00000009614	208	234	328	311	349	406	420	429	405	366
ENSMUSG00000009621	252	172	295	437	478	289	267	287	415	209
ENSMUSG00000009628	8315	12692	13778	6666	6578	12305	14743	13309	20242	12787
ENSMUSG00000009630	616	896	432	509	334	580	601	479	757	846
ENSMUSG00000009633	172	237	156	165	166	116	157	196	140	117
ENSMUSG00000009640	1661	1855	2191	1718	1690	1755	1957	1688	1678	1449
ENSMUSG00000009646	6	3	0	3	3	10	6	3	6	8
ENSMUSG00000009647	546	649	492	549	623	447	564	742	705	597
ENSMUSG00000009654	27	20	38	42	54	77	25	9	42	96
ENSMUSG00000009670	1148	1045	1274	1066	883	1320	1558	1107	1255	772
ENSMUSG00000009681	701	631	623	653	917	760	658	627	772	596
ENSMUSG00000009687	113	131	70	85	102	84	164	157	62	135
ENSMUSG00000009731	29	49	35	84	65	108	94	87	93	91
ENSMUSG00000009733	14292	10068	5960	10786	11419	15553	11764	13036	12834	35554
ENSMUSG00000009734	46	16	10	11	25	28	48	45	29	28
ENSMUSG00000009739	225	298	174	177	211	174	267	201	252	197
ENSMUSG00000009741	1429	1432	1406	1568	1508	1426	1042	1734	1993	1745
ENSMUSG00000009772	49	38	34	42	67	31	20	32	43	13
ENSMUSG00000009828	493	641	755	992	946	747	692	778	1261	920
ENSMUSG00000009863	3910	4682	3923	4330	3324	4390	4074	4971	4502	4431
ENSMUSG00000009876	476	914	968	789	793	936	973	1476	964	413
ENSMUSG00000009894	2589	2659	3143	2569	2701	2408	2860	3299	3307	2801
ENSMUSG00000009900	2	6	1	5	2	7	16	6	1	9
ENSMUSG00000009905	2074	2411	1774	3309	2413	3223	2487	2383	3222	2589
ENSMUSG00000009907	2839	2763	2784	3100	3148	3081	2395	3408	3204	3283
ENSMUSG00000009927	8068	6881	6631	8081	6184	11442	11579	13687	9755	19977
ENSMUSG00000009941	64	110	95	115	108	163	98	127	112	67
ENSMUSG00000009995	1082	1242	1203	994	1075	922	1064	1037	1451	1179
ENSMUSG00000010021	2	22	3	3	5	12	35	9	18	4
ENSMUSG00000010025	1585	1520	1899	2207	1908	1689	1595	1518	2433	1762
ENSMUSG00000010044	10	10	4	2	32	37	6	72	13	23
ENSMUSG00000010045	482	774	841	685	660	710	682	625	656	698
ENSMUSG00000010047	845	1412	1532	1914	1850	1169	1377	1832	2078	1390
ENSMUSG00000010048	418	414	591	436	390	563	517	309	585	636
ENSMUSG00000010051	104	141	81	347	260	291	141	183	145	155
ENSMUSG00000010054	302	355	814	421	210	479	131	191	346	508
ENSMUSG00000010057	1352	1770	2222	2028	1946	2275	2414	2702	2338	2264
ENSMUSG00000010064	68	71	54	50	73	55	66	41	8	109
ENSMUSG00000010066	195	358	211	263	381	101	605	748	257	207
ENSMUSG00000010067	725	913	1080	1052	1170	847	949	1000	1297	1221
ENSMUSG00000010080	74	49	109	80	128	59	73	61	31	57
ENSMUSG00000010086	8	10	5	6	8	22	12	7	7	10
ENSMUSG00000010095	1838	2355	2511	2238	2466	2145	1829	1514	2487	3246
ENSMUSG00000010097	4117	4417	5037	4617	3854	4800	5182	5133	4060	4399
ENSMUSG00000010110	4033	4127	6378	5535	4933	4868	5270	5724	6686	4336
ENSMUSG00000010122	15	12	46	2	59	63	64	5	6	7
ENSMUSG00000010136	2	2	4	6	2	4	2	29	7	4
ENSMUSG00000010142	22	7	26	19	24	50	32	40	14	34
ENSMUSG00000010154	39	49	66	41	40	60	65	32	55	33
ENSMUSG00000010175	317	467	426	304	358	550	579	588	446	524
ENSMUSG00000010205	630	655	546	536	644	536	543	486	536	673
ENSMUSG00000010277	1735	2127	2104	2022	1974	2897	2531	2257	2818	2119
ENSMUSG00000010290	1004	854	987	1397	1159	1141	953	1273	1601	1661
ENSMUSG00000010307	1044	1451	1397	1135	1328	1121	1272	871	1234	1305
ENSMUSG00000010311	7	7	7	7	10	9	13	8	5	4
ENSMUSG00000010342	1893	1873	2000	1825	1488	1523	1917	2327	2764	2249
ENSMUSG00000010358	356	400	291	315	513	384	358	494	418	420
ENSMUSG00000010362	569	718	739	784	838	577	875	901	762	544
ENSMUSG00000010376	3706	3954	3236	3761	3263	3659	3693	4199	3866	3675
ENSMUSG00000010392	927	1366	1104	1224	1345	1133	1216	1193	1893	1501
ENSMUSG00000010406	1343	1588	1098	1312	1050	1277	1706	1246	1116	2243
ENSMUSG00000010435	2	4	1	3	1	7	5	5	4	0
ENSMUSG00000010453	1191	2136	2386	2511	2352	2994	1541	2156	1777	4258
ENSMUSG00000010461	407	245	116	404	214	299	368	359	400	256
ENSMUSG00000010476	27	67	31	54	55	67	49	53	37	35
ENSMUSG00000010492	178	199	187	196	228	256	215	301	253	304
ENSMUSG00000010505	53	23	36	32	36	71	70	80	37	35
ENSMUSG00000010517	703	1089	1674	648	931	811	923	1046	1269	1053
ENSMUSG00000010529	13	14	36	33	3	20	9	6	12	25
ENSMUSG00000010538	338	387	327	405	289	512	407	453	497	532
ENSMUSG00000010554	720	802	758	937	771	1243	875	959	967	877
ENSMUSG00000010592	6112	5863	5497	4888	4547	5125	6488	7635	6498	4037
ENSMUSG00000010601	19	7	1	12	1	12	20	3	8	9
ENSMUSG00000010607	974	1182	1138	1217	914	1398	1296	1315	1755	1173
ENSMUSG00000010608	9073	8401	8995	9860	10424	7231	8474	10474	11057	11980
ENSMUSG00000010609	416	688	816	740	740	822	887	940	434	1118
ENSMUSG00000010651	104	105	70	62	87	106	68	42	131	23
ENSMUSG00000010660	365	484	491	490	600	550	577	386	483	756
ENSMUSG00000010663	1473	1446	1578	1473	1589	1531	1234	1312	1667	2004
ENSMUSG00000010721	1071	976	1623	1050	1106	1376	1186	1291	1603	758
ENSMUSG00000010751	34	74	67	46	94	159	76	74	121	129
ENSMUSG00000010755	1222	1449	2203	1538	1775	2361	2565	2347	1408	1404
ENSMUSG00000010760	6	3	4	4	2	0	4	2	5	7
ENSMUSG00000010796	1094	1043	793	909	837	1411	1369	1076	1071	857
ENSMUSG00000010797	21	23	19	15	36	16	36	43	27	12
ENSMUSG00000010803	48	53	49	51	85	45	67	25	203	31
ENSMUSG00000010825	32	12	8	17	8	22	24	16	31	19
ENSMUSG00000010830	694	858	703	668	750	794	478	679	684	812
ENSMUSG00000010841	8	6	5	8	10	4	9	12	10	9
ENSMUSG00000010911	1264	1056	896	906	1021	865	917	926	1011	1141
ENSMUSG00000010914	1052	1068	1229	1645	1499	1375	1189	1418	1222	1528
ENSMUSG00000010936	879	916	1236	917	609	858	729	1125	1006	747
ENSMUSG00000011008	6	9	2	17	6	3	13	20	12	11
ENSMUSG00000011034	9	33	2	7	9	38	23	14	10	20
ENSMUSG00000011052	1	0	0	0	0	1	2	1	1	4
ENSMUSG00000011096	192	187	413	187	234	302	267	81	374	85
ENSMUSG00000011114	3469	3483	3677	3942	3534	3849	3904	4437	4104	4408
ENSMUSG00000011118	8	5	2	7	14	15	13	5	23	13
ENSMUSG00000011148	35	33	19	26	31	18	14	35	11	49
ENSMUSG00000011154	30	19	26	13	47	25	15	37	22	54
ENSMUSG00000011158	448	303	314	474	530	581	438	575	608	418
ENSMUSG00000011171	144	43	67	69	262	117	130	51	24	97
ENSMUSG00000011179	1347	1227	1060	1083	975	994	851	1248	994	1063
ENSMUSG00000011254	801	731	694	701	1050	1263	651	621	967	913
ENSMUSG00000011256	505	445	528	608	467	567	723	722	343	547
ENSMUSG00000011257	2476	3007	2371	2445	3124	3176	2998	2817	2930	3762
ENSMUSG00000011263	31	30	23	51	15	63	81	10	29	43
ENSMUSG00000011267	244	168	273	302	387	121	174	234	312	313
ENSMUSG00000011305	23	33	29	18	5	28	28	2	4	35
ENSMUSG00000011306	937	959	1018	1047	905	1043	1270	1984	1527	1264
ENSMUSG00000011349	5	1	1	3	1	7	14	2	2	3
ENSMUSG00000011350	4	10	2	6	2	8	11	7	11	9
ENSMUSG00000011382	529	514	475	697	628	1042	885	1100	932	1026
ENSMUSG00000011427	647	412	780	551	475	542	494	328	654	435
ENSMUSG00000011463	26	23	45	39	42	58	28	19	41	108
ENSMUSG00000011486	1	9	4	3	7	8	6	7	1	5
ENSMUSG00000011589	80	105	144	94	75	118	82	112	101	75
ENSMUSG00000011632	1305	1289	1373	1271	1020	1404	1267	1529	1426	1049
ENSMUSG00000011658	108	193	133	190	108	154	218	89	107	194
ENSMUSG00000011751	17	11	4	19	24	33	53	7	16	22
ENSMUSG00000011752	4230	4176	3345	3043	2802	2890	2731	2422	2941	3621
ENSMUSG00000011831	1775	1815	1729	1853	1070	1731	1778	1998	2112	1732
ENSMUSG00000011832	174	290	356	195	253	204	264	297	302	185
ENSMUSG00000011837	501	575	535	592	422	505	374	355	550	501
ENSMUSG00000011877	323	562	430	463	580	721	544	746	491	368
ENSMUSG00000011884	328	437	485	354	475	254	356	231	346	402
ENSMUSG00000011958	1722	2046	2045	2280	2003	1337	1176	1738	1885	2134
ENSMUSG00000011960	1929	2122	2841	2604	2392	2484	2332	3100	3024	2822
ENSMUSG00000012017	118	103	107	74	54	64	60	50	90	94
ENSMUSG00000012042	8	9	23	3	2	11	15	8	14	13
ENSMUSG00000012076	1769	1147	736	1181	675	756	613	987	1366	1196
ENSMUSG00000012114	920	1234	1161	1489	1294	1338	1358	2065	1541	1130
ENSMUSG00000012117	670	750	837	792	621	1002	997	839	1099	683
ENSMUSG00000012123	24	66	24	44	47	41	45	64	65	37
ENSMUSG00000012126	86	169	146	125	192	189	188	205	124	207
ENSMUSG00000012187	7	12	11	7	3	5	27	6	9	19
ENSMUSG00000012211	8	7	12	2	2	9	4	4	5	7
ENSMUSG00000012282	9	4	6	6	18	12	9	6	0	5
ENSMUSG00000012296	354	481	659	664	963	717	222	626	380	642
ENSMUSG00000012350	181	91	126	214	86	73	42	153	303	33
ENSMUSG00000012396	95	107	92	127	49	46	27	59	34	112
ENSMUSG00000012405	6059	7166	5394	6567	5676	7172	8763	11606	5805	13907
ENSMUSG00000012422	4083	3553	2769	3245	3722	2708	2744	4071	4351	4871
ENSMUSG00000012428	736	703	553	240	329	246	514	469	414	619
ENSMUSG00000012429	506	513	350	400	366	348	369	632	380	437
ENSMUSG00000012443	1872	1502	1318	1556	1497	1494	1292	2287	1968	2010
ENSMUSG00000012483	1546	1299	852	1217	1092	1279	1496	1776	1711	1596
ENSMUSG00000012519	215	122	124	148	246	242	258	272	198	347
ENSMUSG00000012520	9	11	5	7	10	30	23	10	11	13
ENSMUSG00000012535	2050	1924	2480	2238	3020	2457	2463	2727	3274	3116
ENSMUSG00000012609	683	802	929	758	790	1065	1030	1047	888	925
ENSMUSG00000012640	1563	1718	1423	1793	1723	1983	2287	2785	2274	1685
ENSMUSG00000012705	11	13	19	44	14	17	28	18	11	28
ENSMUSG00000012777	88	86	228	275	347	135	189	131	391	209
ENSMUSG00000012819	95	117	124	112	90	123	97	61	157	102
ENSMUSG00000012848	28916	30275	24561	31501	21974	25059	24928	29364	30845	27836
ENSMUSG00000012889	19	9	3	14	14	15	19	30	30	16
ENSMUSG00000013033	1727	1842	1647	1570	1671	1749	1583	1796	1891	1974
ENSMUSG00000013076	2523	2649	2158	2470	2201	2798	2477	3573	2983	3411
ENSMUSG00000013083	144	189	70	152	178	82	146	176	178	70
ENSMUSG00000013089	504	545	730	429	824	479	374	592	916	183
ENSMUSG00000013091	2	1	2	2	0	3	4	8	7	0
ENSMUSG00000013150	150	108	202	316	315	354	401	283	334	294
ENSMUSG00000013155	137	111	159	134	121	177	190	158	167	202
ENSMUSG00000013158	56	40	44	42	43	31	36	56	57	44
ENSMUSG00000013160	1217	1343	1299	1333	1019	1236	1301	1501	1371	1218
ENSMUSG00000013236	2147	3025	3433	2145	1889	1810	2523	2761	2806	1967
ENSMUSG00000013275	595	860	653	948	586	693	1191	417	1317	668
ENSMUSG00000013338	11	4	10	9	25	40	17	67	28	11
ENSMUSG00000013353	27	7	12	20	40	25	27	20	61	22
ENSMUSG00000013367	12	4	3	5	1	15	21	6	5	26
ENSMUSG00000013415	98	112	75	63	95	217	180	163	50	115
ENSMUSG00000013418	7	16	20	18	28	21	16	35	42	30
ENSMUSG00000013419	179	296	224	202	219	287	188	365	149	347
ENSMUSG00000013465	1274	1081	1563	1078	1063	1015	895	1111	849	669
ENSMUSG00000013483	65	35	16	28	20	34	63	16	37	4
ENSMUSG00000013495	1317	1690	1458	1395	1383	1311	1680	1843	2343	1901
ENSMUSG00000013523	128	173	114	98	176	119	83	50	36	96
ENSMUSG00000013539	239	301	257	299	614	322	291	535	300	394
ENSMUSG00000013562	12	5	6	6	3	16	11	8	3	26
ENSMUSG00000013584	1150	1040	1512	952	1037	1572	1241	1106	1254	1173
ENSMUSG00000013593	2154	2171	2798	2174	1881	2688	2472	2319	3039	2504
ENSMUSG00000013611	78	163	93	184	138	162	121	124	199	155
ENSMUSG00000013622	2004	2225	2055	2401	2085	2315	1972	2559	2428	2447
ENSMUSG00000013629	430	737	748	1083	788	1119	847	1403	857	460
ENSMUSG00000013643	2	1	4	3	5	13	8	4	4	3
ENSMUSG00000013646	173	243	187	219	45	333	188	161	203	79
ENSMUSG00000013653	21	36	3	16	21	29	23	5	62	29
ENSMUSG00000013662	4192	4135	3838	3978	4530	4327	3268	3799	4369	4439
ENSMUSG00000013663	2059	2455	1362	1923	1421	1240	1132	1600	1024	2169
ENSMUSG00000013668	2	3	1	2	0	8	7	5	2	2
ENSMUSG00000013698	771	1045	887	804	915	861	986	1034	909	913
ENSMUSG00000013701	2301	2374	1996	2382	1893	2640	2227	2427	2792	2033
ENSMUSG00000013707	16	16	42	29	19	28	37	31	19	16
ENSMUSG00000013736	3532	2968	2782	3626	3030	3643	2994	3569	3819	3100
ENSMUSG00000013766	1854	2040	2958	2297	2176	1177	1121	2826	3918	2764
ENSMUSG00000013787	730	1034	920	887	734	888	906	811	792	882
ENSMUSG00000013822	1661	1775	1573	1886	1728	1476	1722	1797	1628	2125
ENSMUSG00000013833	458	387	517	589	813	432	547	704	325	472
ENSMUSG00000013846	94	61	153	97	116	134	100	65	58	104
ENSMUSG00000013858	76	128	129	98	59	149	81	56	42	85
ENSMUSG00000013878	1383	1803	1449	1699	1804	1643	1561	1827	2543	2093
ENSMUSG00000013921	373	366	454	568	520	536	432	340	680	386
ENSMUSG00000013928	22	15	16	8	15	26	52	49	39	31
ENSMUSG00000013936	2	6	2	16	21	5	15	2	2	3
ENSMUSG00000013973	1147	1427	1702	1923	1372	2624	2063	1778	1882	1233
ENSMUSG00000013974	20	13	10	21	4	10	16	23	40	47
ENSMUSG00000013997	598	610	847	713	787	888	951	907	801	748
ENSMUSG00000014030	50	23	72	11	65	17	113	113	19	16
ENSMUSG00000014039	365	454	479	443	288	557	466	1031	465	308
ENSMUSG00000014074	1395	1020	997	896	977	1380	1448	1414	1596	1569
ENSMUSG00000014075	1135	981	697	822	728	867	948	1055	1106	1369
ENSMUSG00000014077	1688	1680	1875	1928	2003	1941	1808	1999	2126	1991
ENSMUSG00000014104	2	2	4	2	8	5	14	3	6	8
ENSMUSG00000014158	29	37	18	17	14	18	15	8	45	8
ENSMUSG00000014164	291	235	145	219	329	167	274	216	242	262
ENSMUSG00000014177	3884	3254	3439	3545	2722	3677	3749	3137	4034	2805
ENSMUSG00000014195	3367	3196	4403	4209	3314	3874	4224	5144	5542	3508
ENSMUSG00000014198	4	9	4	9	6	22	16	8	10	11
ENSMUSG00000014226	4876	5100	4256	4610	4592	4097	4636	4716	5141	5725
ENSMUSG00000014232	1415	1361	1496	1461	1416	1235	1270	1728	1758	1472
ENSMUSG00000014243	962	916	853	869	679	875	829	782	876	911
ENSMUSG00000014245	301	265	394	351	321	488	595	532	601	302
ENSMUSG00000014294	1984	2050	1788	2094	1567	2143	2260	2218	1970	2488
ENSMUSG00000014301	754	807	599	511	520	249	267	832	935	850
ENSMUSG00000014303	683	717	702	661	670	495	457	658	735	659
ENSMUSG00000014313	7723	6863	5317	6293	4509	6089	6102	7881	8045	8057
ENSMUSG00000014329	892	1161	987	871	685	1140	842	1172	725	1450
ENSMUSG00000014349	710	669	859	594	622	944	860	1032	968	813
ENSMUSG00000014351	0	1	0	3	1	1	5	4	2	0
ENSMUSG00000014353	2034	2138	2013	2140	1960	2073	2595	2213	3084	3096
ENSMUSG00000014355	2346	3270	3206	3168	2448	2820	2850	3067	4122	2825
ENSMUSG00000014361	391	459	673	650	626	537	454	795	824	516
ENSMUSG00000014402	4295	4357	4919	4717	4168	4008	3870	5238	5728	4467
ENSMUSG00000014418	774	698	1227	971	1079	960	807	713	874	1119
ENSMUSG00000014426	1109	1378	1539	1353	1413	1012	1137	1226	1160	1251
ENSMUSG00000014444	433	448	436	467	203	136	522	960	374	350
ENSMUSG00000014453	6	2	7	4	4	21	13	4	14	6
ENSMUSG00000014470	212	319	241	325	284	220	361	193	257	401
ENSMUSG00000014496	1145	956	958	1010	1325	771	1162	1466	1015	1483
ENSMUSG00000014498	342	250	357	266	217	402	289	479	472	482
ENSMUSG00000014503	6032	5253	4480	5359	6263	4911	3638	5270	6800	8472
ENSMUSG00000014504	1712	1461	1385	1490	1312	1610	1284	1366	1588	2259
ENSMUSG00000014529	7	4	2	6	5	15	10	7	3	7
ENSMUSG00000014542	1	4	10	2	2	6	5	10	4	5
ENSMUSG00000014543	5	2	7	6	7	10	14	21	13	11
ENSMUSG00000014547	899	759	752	925	667	819	907	621	1251	868
ENSMUSG00000014550	700	840	1207	1077	824	1435	1304	1493	795	1309
ENSMUSG00000014551	2024	1857	1445	1690	1546	1326	1572	1749	1582	1789
ENSMUSG00000014554	768	765	921	718	696	790	763	830	1193	891
ENSMUSG00000014592	3460	3349	4239	2937	3539	3924	3381	4427	3811	3264
ENSMUSG00000014599	55	88	106	97	126	82	47	89	72	190
ENSMUSG00000014601	813	599	1186	597	1107	777	588	716	779	714
ENSMUSG00000014602	178	206	270	325	95	321	249	300	303	274
ENSMUSG00000014603	3	3	3	1	1	5	4	4	1	4
ENSMUSG00000014606	1515	1666	2331	1948	2015	1671	1513	1849	2246	1689
ENSMUSG00000014609	4	5	6	1	3	5	4	2	17	2
ENSMUSG00000014633	776	966	1076	946	819	953	987	820	1128	937
ENSMUSG00000014668	735	861	1361	1133	1291	1486	1312	1204	1043	920
ENSMUSG00000014686	5	1	0	0	2	2	3	0	0	1
ENSMUSG00000014704	24	9	2	22	17	33	10	2	8	22
ENSMUSG00000014725	49	30	17	33	25	58	67	45	34	36
ENSMUSG00000014747	2	8	4	8	10	6	17	7	13	3
ENSMUSG00000014748	1173	1441	2089	2006	2254	2025	1525	2427	1705	1518
ENSMUSG00000014763	1343	1076	1642	1301	811	1564	1460	1741	1719	1479
ENSMUSG00000014767	1121	1477	1330	1553	1456	1210	1353	1568	1609	1687
ENSMUSG00000014769	7792	8001	6410	8142	6427	6370	6046	8188	7785	7990
ENSMUSG00000014771	341	400	217	315	288	239	293	320	241	429
ENSMUSG00000014773	64	76	32	35	11	25	10	60	47	67
ENSMUSG00000014776	31	20	17	10	17	27	22	10	4	14
ENSMUSG00000014778	72	82	69	128	148	137	83	66	94	102
ENSMUSG00000014782	10	10	25	58	123	60	50	9	17	59
ENSMUSG00000014786	49	47	63	28	36	61	54	49	57	28
ENSMUSG00000014791	91	125	120	109	92	56	107	115	124	197
ENSMUSG00000014813	1005	831	605	851	946	1093	561	434	725	2113
ENSMUSG00000014837	301	265	302	365	262	301	338	349	373	642
ENSMUSG00000014846	71	94	75	85	77	67	78	70	98	133
ENSMUSG00000014850	1522	1029	1829	1210	1500	1532	1459	1683	2229	1864
ENSMUSG00000014852	20	23	24	28	26	37	57	33	25	11
ENSMUSG00000014856	907	1178	920	1052	741	1096	957	1025	1192	1169
ENSMUSG00000014859	516	547	537	585	421	470	634	688	759	836
ENSMUSG00000014867	5153	5723	8536	6397	8145	5907	5620	5276	6987	7076
ENSMUSG00000014873	380	590	620	583	352	474	408	507	660	702
ENSMUSG00000014905	2563	1759	1783	1416	1047	1426	1303	1683	1563	1519
ENSMUSG00000014907	209	187	41	71	74	168	95	110	63	125
ENSMUSG00000014932	1780	1308	1844	1329	1090	1259	1114	1673	1814	1889
ENSMUSG00000014956	5977	6337	5536	6568	6171	6613	5315	8562	7848	9308
ENSMUSG00000014959	2120	2122	1975	2282	3379	2608	1831	2242	1960	3048
ENSMUSG00000014980	868	853	626	887	610	770	778	502	797	853
ENSMUSG00000015001	3	2	19	6	24	8	14	6	3	10
ENSMUSG00000015002	2893	2897	3867	2694	2926	2788	2587	2044	2857	3048
ENSMUSG00000015013	989	871	745	924	916	1253	1073	1276	930	1108
ENSMUSG00000015016	200	260	298	322	248	430	277	356	272	296
ENSMUSG00000015023	1141	1603	2242	1309	2754	1464	1665	1217	1088	2000
ENSMUSG00000015027	149	188	204	166	233	177	113	310	144	241
ENSMUSG00000015053	119	189	42	125	146	105	107	114	114	147
ENSMUSG00000015083	244	344	464	435	295	291	552	393	457	256
ENSMUSG00000015085	85	85	93	120	102	174	118	116	131	190
ENSMUSG00000015087	688	757	801	837	740	770	825	784	650	924
ENSMUSG00000015090	705	875	929	944	734	767	1117	1193	803	741
ENSMUSG00000015092	1460	2240	2276	1932	1810	1870	2160	2157	2118	1623
ENSMUSG00000015093	9	14	17	22	8	5	11	21	10	18
ENSMUSG00000015094	386	553	629	436	385	496	633	764	699	467
ENSMUSG00000015095	1169	1700	1832	2153	2612	1820	2197	2468	2038	1449
ENSMUSG00000015112	1201	1070	1498	1136	1429	1075	1104	903	1439	1677
ENSMUSG00000015120	6006	6327	6985	7726	5950	7900	6145	7463	8590	6842
ENSMUSG00000015126	373	416	359	402	302	368	339	367	391	357
ENSMUSG00000015127	254	187	185	221	151	322	183	252	305	240
ENSMUSG00000015133	374	394	454	375	442	468	704	711	487	633
ENSMUSG00000015134	156	101	117	238	102	230	69	86	203	147
ENSMUSG00000015143	973	1051	854	917	819	738	854	1164	1004	1144
ENSMUSG00000015149	1050	1356	1682	1512	1716	1609	1897	1870	1562	1486
ENSMUSG00000015165	3189	3740	2916	2817	2887	5086	3644	5958	5301	8473
ENSMUSG00000015176	2593	2635	3083	3423	3064	2889	4059	4620	3827	3497
ENSMUSG00000015189	912	667	1270	804	1008	793	800	833	1113	1643
ENSMUSG00000015202	312	209	359	243	244	302	268	263	437	265
ENSMUSG00000015214	464	598	556	478	379	372	412	584	612	592
ENSMUSG00000015217	4715	5570	6492	5122	6805	5908	6036	9881	8417	10250
ENSMUSG00000015222	479	452	650	504	627	1114	608	720	586	857
ENSMUSG00000015224	198	129	225	127	126	77	164	216	212	303
ENSMUSG00000015242	11	14	4	1	6	5	29	14	2	15
ENSMUSG00000015243	2858	2857	3150	2591	2442	2377	2392	3319	3259	2530
ENSMUSG00000015247	2078	1637	1696	1673	2089	2020	1405	1880	2249	2763
ENSMUSG00000015289	1653	1658	1613	1510	1280	1735	1762	1796	1920	1826
ENSMUSG00000015290	2031	2465	2451	2322	2215	2537	2795	2812	2682	2334
ENSMUSG00000015291	3789	3902	5104	5147	5094	4447	5511	6204	5097	5221
ENSMUSG00000015305	647	619	571	526	719	525	900	1058	960	660
ENSMUSG00000015312	151	90	160	125	141	140	230	153	116	172
ENSMUSG00000015314	23	56	99	45	26	130	65	50	67	34
ENSMUSG00000015316	30	24	32	30	23	40	63	27	24	29
ENSMUSG00000015335	368	393	418	435	389	505	470	417	423	358
ENSMUSG00000015337	27	34	22	23	32	34	30	15	13	30
ENSMUSG00000015340	456	147	157	199	207	183	179	196	106	270
ENSMUSG00000015341	5247	5013	5379	4727	4705	4406	4823	5596	6355	5762
ENSMUSG00000015342	236	96	186	202	61	211	195	297	324	108
ENSMUSG00000015354	13	24	4	16	36	30	15	32	28	21
ENSMUSG00000015355	31	35	33	32	64	54	33	27	8	24
ENSMUSG00000015357	2651	2248	3171	2685	2834	2810	2719	2033	3291	2393
ENSMUSG00000015363	268	302	558	396	555	374	426	555	391	361
ENSMUSG00000015365	1971	2039	2721	1821	1902	3834	3418	4257	2353	1569
ENSMUSG00000015377	133	148	225	139	92	166	128	202	196	151
ENSMUSG00000015396	75	174	46	84	96	106	91	108	48	123
ENSMUSG00000015401	25	10	14	20	55	5	46	79	36	77
ENSMUSG00000015405	149	218	7	137	83	173	97	311	141	33
ENSMUSG00000015437	5	3	5	8	3	7	10	1	7	4
ENSMUSG00000015441	0	0	0	0	0	0	2	4	1	1
ENSMUSG00000015443	4	0	0	2	3	3	1	2	0	0
ENSMUSG00000015451	18	35	22	59	36	49	72	23	78	24
ENSMUSG00000015452	24	36	39	42	36	41	15	19	4	40
ENSMUSG00000015461	575	778	951	1020	709	1036	1102	1181	796	810
ENSMUSG00000015467	13	26	13	29	11	43	11	16	49	47
ENSMUSG00000015468	24	42	66	124	49	77	26	117	22	40
ENSMUSG00000015474	449	421	485	517	478	418	353	522	612	517
ENSMUSG00000015476	14	12	12	4	16	19	19	2	14	8
ENSMUSG00000015478	818	955	965	892	773	881	565	556	853	847
ENSMUSG00000015484	12	11	9	11	22	11	16	5	10	7
ENSMUSG00000015488	748	769	969	950	847	889	847	695	733	1034
ENSMUSG00000015501	97	162	150	142	120	184	316	286	138	220
ENSMUSG00000015519	1	7	3	4	3	9	8	8	7	5
ENSMUSG00000015522	1124	1432	1780	1494	1867	1526	1399	2226	1640	1764
ENSMUSG00000015533	383	178	152	73	258	160	234	289	346	188
ENSMUSG00000015536	1655	1390	1481	1520	1081	1692	1074	1566	886	1670
ENSMUSG00000015542	477	473	476	516	409	513	473	533	521	531
ENSMUSG00000015568	1693	2049	1696	3125	1804	1901	2074	1918	1787	2152
ENSMUSG00000015575	3712	3811	2641	3497	2583	2903	3233	3874	3589	4119
ENSMUSG00000015579	4	2	0	1	0	3	4	2	0	0
ENSMUSG00000015597	1932	1765	1862	1392	1969	1202	1575	1859	2298	2357
ENSMUSG00000015599	33	38	18	38	38	88	43	46	29	83
ENSMUSG00000015605	220	183	238	278	224	128	126	162	260	319
ENSMUSG00000015619	71	143	75	65	226	40	129	117	292	141
ENSMUSG00000015627	9	4	11	7	36	17	23	10	11	10
ENSMUSG00000015647	106	82	137	126	256	99	62	83	180	285
ENSMUSG00000015652	36	37	26	31	33	52	16	46	43	15
ENSMUSG00000015653	1131	728	802	603	542	899	543	643	887	815
ENSMUSG00000015656	30043	28127	29609	29481	26493	40700	40205	39389	38582	39694
ENSMUSG00000015659	128	129	270	238	284	180	323	180	221	199
ENSMUSG00000015665	8	3	3	4	10	7	13	8	5	10
ENSMUSG00000015668	2646	2625	2442	2500	2304	2830	2982	2767	2843	2739
ENSMUSG00000015671	6850	7026	6190	7344	5174	5281	5327	6748	8172	8008
ENSMUSG00000015672	3482	3178	2776	3287	2176	2827	2823	3437	3527	3160
ENSMUSG00000015697	2097	2239	1985	2393	2038	1858	2059	2379	2296	2284
ENSMUSG00000015702	24	25	10	35	11	12	8	22	10	35
ENSMUSG00000015709	617	841	1145	781	776	1091	613	1073	1186	828
ENSMUSG00000015711	1293	1310	1435	1257	1008	1644	1500	1879	1864	1502
ENSMUSG00000015714	2664	2750	3206	3617	3017	3053	2475	3097	3961	3907
ENSMUSG00000015721	20191	20290	38998	14505	32419	64268	34681	12706	63825	51420
ENSMUSG00000015733	8018	8369	7405	8616	7864	6396	7353	8607	8704	9395
ENSMUSG00000015745	195	245	284	258	205	180	273	366	194	298
ENSMUSG00000015747	674	461	726	499	452	695	688	835	721	594
ENSMUSG00000015748	907	664	866	799	938	883	1067	977	1272	1068
ENSMUSG00000015749	2003	2673	2723	3454	2896	3345	3237	3555	3176	3977
ENSMUSG00000015750	866	1024	1285	1016	1068	595	1126	994	1180	1239
ENSMUSG00000015755	1331	1571	1706	1629	1427	1293	1425	1683	2030	1746
ENSMUSG00000015757	2178	2323	2449	2294	2522	1933	2721	3015	3486	2322
ENSMUSG00000015759	4564	4258	4235	4422	3685	3792	4037	4196	5307	4996
ENSMUSG00000015766	1011	1451	1832	1161	1519	1295	751	726	1161	2050
ENSMUSG00000015776	803	913	1000	1042	868	1012	942	951	975	894
ENSMUSG00000015787	16	15	19	27	10	19	16	26	8	16
ENSMUSG00000015790	1155	1305	1258	1238	1125	1066	1254	1421	1354	1261
ENSMUSG00000015804	5617	5954	4825	4675	3988	5109	5085	4903	5738	5461
ENSMUSG00000015806	1071	1322	1539	1253	1223	1172	1226	1519	1581	1434
ENSMUSG00000015812	30	6	10	16	19	22	24	19	14	21
ENSMUSG00000015829	28	32	22	50	33	32	91	55	96	32
ENSMUSG00000015837	1570	1658	1808	1492	1495	1936	1430	1403	1374	1829
ENSMUSG00000015839	4229	3882	4939	5492	5627	3800	3642	4938	5418	6292
ENSMUSG00000015843	6	23	3	14	2	8	7	3	9	3
ENSMUSG00000015846	273	362	318	424	372	532	469	435	417	452
ENSMUSG00000015850	36	63	18	48	44	70	68	63	31	82
ENSMUSG00000015852	66	52	72	40	34	77	70	86	90	35
ENSMUSG00000015854	9	4	6	4	10	6	20	4	5	22
ENSMUSG00000015869	1992	1769	2074	2189	2285	1993	2085	2197	2612	2737
ENSMUSG00000015879	127	57	72	69	84	74	177	74	119	104
ENSMUSG00000015880	5719	5718	5072	5746	5628	6887	7210	7692	10234	8305
ENSMUSG00000015882	1343	1420	1599	1377	1124	1217	1673	2280	1825	1789
ENSMUSG00000015889	1217	1268	1033	1058	1330	1272	1144	1341	1409	1280
ENSMUSG00000015890	10	7	13	8	11	10	16	16	18	13
ENSMUSG00000015932	11964	12060	10432	11679	10734	9018	10063	11773	12488	12310
ENSMUSG00000015937	2590	3174	3390	3410	3019	3739	3069	5067	3784	4890
ENSMUSG00000015942	251	175	179	174	233	227	246	82	161	285
ENSMUSG00000015943	531	641	519	552	569	560	590	687	685	635
ENSMUSG00000015944	1067	1118	933	793	569	615	1286	1008	756	1240
ENSMUSG00000015947	48	27	26	50	4	15	59	32	7	65
ENSMUSG00000015950	55	19	32	45	76	50	22	25	17	116
ENSMUSG00000015957	38	91	60	68	170	61	84	111	111	37
ENSMUSG00000015961	6728	5459	5182	4424	4914	3513	3603	4338	5463	4828
ENSMUSG00000015962	2	7	2	1	2	2	16	2	1	2
ENSMUSG00000015966	343	428	397	292	236	444	343	328	408	259
ENSMUSG00000015968	1247	1084	1828	1054	1400	948	1326	1893	1658	1308
ENSMUSG00000015970	344	275	348	235	154	298	366	408	522	166
ENSMUSG00000015971	1789	2299	3347	2825	2794	2096	3003	3245	3241	3236
ENSMUSG00000015980	152	92	142	119	148	143	155	124	277	61
ENSMUSG00000015981	8	12	6	10	4	11	9	2	1	5
ENSMUSG00000015994	1261	1237	1787	1373	1431	1272	1133	1455	1682	1680
ENSMUSG00000016018	3551	3519	4645	3734	3505	3301	3666	4675	4724	5126
ENSMUSG00000016024	112	150	102	227	285	134	153	111	141	135
ENSMUSG00000016028	336	288	189	370	233	721	151	339	119	460
ENSMUSG00000016087	474	638	160	488	396	615	434	1026	618	460
ENSMUSG00000016128	421	172	169	393	115	339	225	360	313	279
ENSMUSG00000016150	93	101	112	92	115	198	144	159	227	88
ENSMUSG00000016179	601	919	1133	1187	1015	1424	1393	1813	2088	1078
ENSMUSG00000016181	599	327	527	388	454	431	506	470	517	247
ENSMUSG00000016194	53	46	43	59	33	91	77	75	57	21
ENSMUSG00000016200	1089	978	743	623	668	1155	877	1798	1261	772
ENSMUSG00000016206	705	493	588	603	479	667	978	781	582	1060
ENSMUSG00000016239	241	199	137	193	152	183	369	316	216	154
ENSMUSG00000016252	4558	4585	4441	3988	3707	4113	3944	5568	4718	4206
ENSMUSG00000016253	1556	1813	1698	1885	2184	2065	1878	1966	2702	2013
ENSMUSG00000016255	3	6	1	3	1	7	5	0	1	20
ENSMUSG00000016256	1701	1741	1763	1688	1548	1413	1451	1833	1509	1635
ENSMUSG00000016257	1372	1573	1811	1553	2062	1547	1446	2161	2154	1855
ENSMUSG00000016262	224	189	183	119	121	179	91	193	132	127
ENSMUSG00000016283	13	33	62	29	27	7	5	86	20	9
ENSMUSG00000016308	2937	3237	2942	3158	2806	3567	3517	4388	4623	4095
ENSMUSG00000016319	17146	18256	14972	17581	17718	17424	17163	17564	19279	21964
ENSMUSG00000016327	14	21	10	19	11	23	26	21	20	12
ENSMUSG00000016344	896	1333	948	955	999	1048	1040	1175	1395	1242
ENSMUSG00000016346	37	17	36	39	37	50	77	40	94	78
ENSMUSG00000016349	4	3	3	1	4	8	14	3	6	1
ENSMUSG00000016356	44	36	25	43	13	56	70	47	47	39
ENSMUSG00000016382	5213	5357	5588	4393	5359	3855	4705	7109	5565	5700
ENSMUSG00000016386	86	80	85	62	33	100	74	101	78	63
ENSMUSG00000016409	1163	904	910	891	822	806	818	1025	1282	966
ENSMUSG00000016427	2176	2150	1777	1891	1432	2315	2488	2987	2384	3049
ENSMUSG00000016458	5623	6525	4902	5268	6743	3583	5463	6986	7127	5020
ENSMUSG00000016477	343	394	236	270	101	277	229	315	217	391
ENSMUSG00000016481	2584	2296	2257	2393	2154	2446	2556	2703	3284	3253
ENSMUSG00000016487	1865	1315	1912	1847	2675	1723	1478	1884	1773	2816
ENSMUSG00000016493	208	201	149	240	119	160	197	201	319	374
ENSMUSG00000016494	2034	2796	2610	2789	3358	3119	2031	3367	2927	5012
ENSMUSG00000016495	1317	1275	1093	1399	1273	1319	1060	1394	1440	1866
ENSMUSG00000016496	63	60	70	75	153	127	60	76	103	165
ENSMUSG00000016498	4	2	5	3	19	4	11	0	8	19
ENSMUSG00000016503	824	995	1323	1127	1180	1216	1391	1413	1198	1173
ENSMUSG00000016510	1174	1554	1380	1760	1165	1775	1361	2072	2050	1952
ENSMUSG00000016520	387	421	287	346	372	269	529	459	482	643
ENSMUSG00000016524	2	1	2	2	0	3	3	2	2	1
ENSMUSG00000016526	118	69	167	132	39	47	60	49	105	188
ENSMUSG00000016528	466	563	540	401	393	384	325	406	305	562
ENSMUSG00000016529	1	4	2	2	1	6	13	2	0	7
ENSMUSG00000016534	10447	9748	11772	10411	10107	9655	9565	11165	14091	11321
ENSMUSG00000016541	5201	5131	4807	5043	7039	5182	5638	7285	6566	6917
ENSMUSG00000016552	317	148	240	267	242	227	169	110	164	151
ENSMUSG00000016554	3476	4527	4649	5153	4893	5044	4157	4239	5312	4350
ENSMUSG00000016559	64764	73909	63676	60072	61953	64568	69934	71343	76384	72407
ENSMUSG00000016619	723	989	1191	912	762	1345	873	924	1240	1123
ENSMUSG00000016624	24	4	24	13	6	28	50	27	14	38
ENSMUSG00000016626	40234	31779	36344	34166	38909	40668	38830	43026	51763	52089
ENSMUSG00000016637	1885	2007	1887	2320	1837	1889	2280	2951	2292	1630
ENSMUSG00000016664	1718	1574	2638	2253	2438	1939	2086	1838	2443	2148
ENSMUSG00000016756	684	599	523	362	676	564	779	714	480	448
ENSMUSG00000016757	694	795	818	894	749	841	663	711	824	871
ENSMUSG00000016758	41	36	28	43	70	12	19	55	41	31
ENSMUSG00000016763	255	179	301	281	133	248	164	220	103	565
ENSMUSG00000016831	1678	1707	1448	1721	1464	1324	1709	2580	1843	1992
ENSMUSG00000016833	2463	2288	1856	2272	1772	2437	2277	2860	2836	3220
ENSMUSG00000016918	978	1182	1186	719	1269	1340	1340	1245	1187	1323
ENSMUSG00000016921	4299	3394	3270	3573	2745	2876	2514	2959	3674	4044
ENSMUSG00000016933	1586	1764	1482	1835	1884	1616	1516	1338	2125	1813
ENSMUSG00000016940	388	325	359	384	413	357	317	310	315	303
ENSMUSG00000016942	2	23	18	50	12	42	24	14	7	28
ENSMUSG00000016946	349	395	449	414	351	442	299	282	373	469
ENSMUSG00000016982	13	3	14	5	4	13	19	6	9	4
ENSMUSG00000016984	758	497	340	460	295	388	428	448	584	692
ENSMUSG00000016995	26	8	14	14	12	39	28	20	15	44
ENSMUSG00000016998	3	2	3	3	2	2	4	3	1	4
ENSMUSG00000017000	0	1	2	0	2	1	0	1	1	0
ENSMUSG00000017002	18	18	1	8	1	3	12	2	18	28
ENSMUSG00000017003	2	1	0	1	0	2	7	2	5	0
ENSMUSG00000017004	1	2	9	3	0	8	1	8	2	3
ENSMUSG00000017007	8	15	12	9	5	38	21	11	19	21
ENSMUSG00000017009	6025	8428	12890	11662	15642	10639	12213	15880	12308	12644
ENSMUSG00000017049	3	2	3	1	1	11	3	5	0	7
ENSMUSG00000017057	803	735	1162	874	532	827	760	1401	869	715
ENSMUSG00000017064	3	2	5	1	0	2	5	2	0	0
ENSMUSG00000017119	2802	3730	3323	3184	2992	2857	3911	3897	3747	4786
ENSMUSG00000017132	294	351	232	232	229	200	240	282	376	262
ENSMUSG00000017144	1244	1342	1026	1451	1550	1316	1357	2467	2073	1539
ENSMUSG00000017146	1056	1053	767	743	1108	890	807	1021	1477	1289
ENSMUSG00000017165	2	1	0	0	1	5	3	2	0	0
ENSMUSG00000017167	93	58	86	39	58	69	103	192	94	45
ENSMUSG00000017176	1323	1421	1485	1484	1538	1674	1420	1103	1529	1567
ENSMUSG00000017188	1421	1820	1719	1930	1674	1758	1739	1837	1622	1553
ENSMUSG00000017195	39	14	68	38	27	28	27	21	84	30
ENSMUSG00000017204	9	39	7	13	17	18	12	10	19	12
ENSMUSG00000017210	675	694	911	924	1012	905	534	849	929	885
ENSMUSG00000017211	10	13	8	6	2	82	63	6	3	3
ENSMUSG00000017221	974	999	1154	907	1020	610	679	750	880	879
ENSMUSG00000017264	1934	2019	2305	2473	2151	2539	2438	3016	2921	2152
ENSMUSG00000017286	1561	1974	2189	2081	2105	2000	2020	2288	2351	2296
ENSMUSG00000017288	822	1067	1434	1188	995	1207	1299	1355	1334	1275
ENSMUSG00000017291	7815	7739	6463	6941	6555	5487	6080	7959	9257	8016
ENSMUSG00000017299	244	233	215	217	143	236	187	223	244	370
ENSMUSG00000017300	4	7	5	9	0	0	0	4	0	0
ENSMUSG00000017307	195	205	154	205	222	205	309	352	326	255
ENSMUSG00000017309	12	13	15	56	43	63	27	37	22	16
ENSMUSG00000017310	35	17	28	46	3	27	72	19	61	52
ENSMUSG00000017311	1	0	2	1	0	2	6	2	1	0
ENSMUSG00000017314	60	56	56	64	71	97	41	49	27	94
ENSMUSG00000017316	0	1	0	2	0	2	3	0	0	0
ENSMUSG00000017344	7	5	13	22	24	26	39	34	49	9
ENSMUSG00000017376	1157	1013	921	979	882	839	989	1065	1122	1578
ENSMUSG00000017386	158	190	528	445	453	204	228	257	377	309
ENSMUSG00000017390	121	115	83	82	95	192	130	137	318	90
ENSMUSG00000017400	30	13	14	18	16	28	102	39	18	28
ENSMUSG00000017404	8369	8760	5850	7919	5870	9711	9344	11349	7874	12847
ENSMUSG00000017405	403	379	476	380	408	453	443	429	552	535
ENSMUSG00000017412	104	88	335	388	1521	570	493	155	259	205
ENSMUSG00000017417	379	516	732	262	495	385	484	574	401	402
ENSMUSG00000017418	910	881	1099	891	866	1103	1030	1226	1200	1500
ENSMUSG00000017421	7873	7282	7436	9720	7693	7349	6361	8962	9960	10028
ENSMUSG00000017428	4323	4576	4848	4949	5079	4605	4091	4879	5473	5832
ENSMUSG00000017446	206	351	524	321	572	350	420	722	269	590
ENSMUSG00000017453	53	64	66	64	29	214	90	90	125	144
ENSMUSG00000017466	881	1006	981	1259	649	905	733	1157	1224	967
ENSMUSG00000017478	588	763	670	576	926	545	524	778	616	548
ENSMUSG00000017485	2651	3854	2136	2631	2295	2587	2069	3135	3607	2772
ENSMUSG00000017491	24	23	27	13	17	39	30	61	38	40
ENSMUSG00000017493	1876	2075	3129	1704	1808	1913	1100	1544	2127	1931
ENSMUSG00000017499	607	574	730	588	560	998	777	989	704	949
ENSMUSG00000017548	1867	1770	1538	1686	1678	1484	1477	1583	2498	2140
ENSMUSG00000017550	1411	1074	870	605	839	760	851	1230	1253	977
ENSMUSG00000017561	720	621	743	700	526	552	667	611	656	714
ENSMUSG00000017588	4	0	6	1	2	8	6	2	2	1
ENSMUSG00000017607	33	13	12	32	7	35	76	16	114	7
ENSMUSG00000017615	3087	3523	3539	3866	3738	3323	3484	4193	4475	3933
ENSMUSG00000017631	763	772	726	721	821	608	905	655	832	772
ENSMUSG00000017639	383	625	742	495	469	627	620	746	806	389
ENSMUSG00000017652	30	86	51	49	80	82	30	62	38	87
ENSMUSG00000017664	423	663	851	848	674	1020	835	1146	1005	657
ENSMUSG00000017667	744	770	752	684	682	686	629	591	962	766
ENSMUSG00000017670	698	866	684	978	979	1023	1002	938	868	1136
ENSMUSG00000017677	4704	4634	4557	4370	4622	3942	4166	6162	5380	5489
ENSMUSG00000017679	704	696	591	604	800	737	748	1005	956	777
ENSMUSG00000017686	2126	1747	2272	1923	1205	1871	1937	1846	2116	2279
ENSMUSG00000017688	5	5	2	5	9	5	11	6	8	6
ENSMUSG00000017692	52	72	31	82	40	70	78	67	129	54
ENSMUSG00000017697	297	381	295	236	229	202	278	310	275	254
ENSMUSG00000017707	10701	8967	5706	7464	6424	4756	4675	8176	5986	8012
ENSMUSG00000017713	42	67	112	85	23	49	56	47	8	77
ENSMUSG00000017715	431	520	563	728	507	557	350	432	482	707
ENSMUSG00000017716	5114	4542	4537	4884	3329	4875	4632	4984	5791	4745
ENSMUSG00000017718	220	141	252	257	244	329	265	184	394	214
ENSMUSG00000017720	2	1	1	1	3	2	12	3	1	17
ENSMUSG00000017721	503	493	480	384	424	557	439	464	487	535
ENSMUSG00000017723	27	34	27	33	51	18	48	43	56	16
ENSMUSG00000017724	16	5	28	17	11	14	12	2	11	18
ENSMUSG00000017733	109	44	88	170	77	83	120	88	57	205
ENSMUSG00000017734	88	156	163	83	95	49	116	118	201	163
ENSMUSG00000017737	10	8	0	18	15	32	22	20	14	20
ENSMUSG00000017740	62	58	10	40	81	38	48	20	59	46
ENSMUSG00000017747	252	145	203	184	219	150	125	196	244	163
ENSMUSG00000017754	277	351	335	334	407	350	329	519	403	572
ENSMUSG00000017756	1095	1209	2455	1459	1538	1385	1647	1847	2334	572
ENSMUSG00000017760	2754	3857	4941	3670	3915	4169	4113	3984	5214	3146
ENSMUSG00000017764	649	545	629	634	613	677	634	795	567	596
ENSMUSG00000017765	328	315	617	430	485	511	453	779	497	659
ENSMUSG00000017767	70	51	48	51	41	43	40	69	57	53
ENSMUSG00000017774	717	1161	1360	1190	938	1047	1152	892	1070	1088
ENSMUSG00000017776	3046	2060	1937	1764	1552	1827	1697	2037	2810	2774
ENSMUSG00000017778	2622	2732	1754	2100	1807	2520	2338	3237	3995	2600
ENSMUSG00000017781	855	925	577	711	667	787	611	980	882	661
ENSMUSG00000017801	774	775	639	648	509	703	873	649	896	604
ENSMUSG00000017802	518	442	468	574	578	406	470	444	431	587
ENSMUSG00000017817	13	22	9	15	7	17	23	50	11	26
ENSMUSG00000017830	15	23	38	45	43	17	43	68	28	54
ENSMUSG00000017831	928	1059	610	868	606	697	786	876	1413	960
ENSMUSG00000017832	1	2	3	3	0	5	4	2	15	15
ENSMUSG00000017837	894	1033	1342	1198	1180	1185	1036	1176	1258	1124
ENSMUSG00000017843	4154	4289	3630	4919	4018	3443	3448	4552	4297	5108
ENSMUSG00000017858	2532	2217	2009	2225	1956	2359	2647	3127	2773	2472
ENSMUSG00000017861	965	1032	1378	1205	1135	1199	940	991	1480	628
ENSMUSG00000017868	6	9	14	8	3	11	22	8	41	7
ENSMUSG00000017897	37	35	4	53	19	47	12	56	68	13
ENSMUSG00000017922	2	3	1	0	1	6	3	0	4	8
ENSMUSG00000017929	222	372	247	334	314	293	222	305	342	343
ENSMUSG00000017943	8	5	13	12	2	6	7	38	1	24
ENSMUSG00000017950	10	17	8	17	27	53	33	17	11	7
ENSMUSG00000017969	924	974	1032	1154	912	1045	699	1534	858	993
ENSMUSG00000017978	567	475	483	370	495	348	306	731	619	484
ENSMUSG00000017999	742	830	1080	1143	863	1436	1232	2196	1206	1073
ENSMUSG00000018001	1147	1194	1596	995	1335	1129	1177	1229	1165	1491
ENSMUSG00000018008	109	23	7	46	179	51	62	104	52	25
ENSMUSG00000018012	50	17	41	38	27	40	31	20	15	16
ENSMUSG00000018040	560	736	1211	1193	987	934	843	813	826	1032
ENSMUSG00000018042	1775	2647	2882	3341	3271	3546	3294	4413	3577	3023
ENSMUSG00000018068	1428	2027	1922	1901	2062	2259	1840	2694	2284	1692
ENSMUSG00000018076	1733	1979	1793	1982	1931	1756	1972	2441	2355	2416
ENSMUSG00000018102	181	167	108	183	90	124	136	59	79	279
ENSMUSG00000018126	6	4	3	31	2	14	17	2	6	2
ENSMUSG00000018143	397	453	443	515	481	557	457	535	586	494
ENSMUSG00000018160	3355	3806	4522	3349	3387	3395	3228	3701	3787	3484
ENSMUSG00000018166	49	48	88	112	49	108	127	152	175	61
ENSMUSG00000018167	642	704	881	927	1140	1176	1106	946	1024	1153
ENSMUSG00000018168	24	22	13	16	7	48	41	30	33	24
ENSMUSG00000018169	57	80	74	80	52	72	65	101	83	73
ENSMUSG00000018171	2935	2600	3081	3450	3241	3759	3365	4197	3924	3289
ENSMUSG00000018189	2712	2630	3335	2703	2980	2557	2354	2927	3327	3096
ENSMUSG00000018196	597	773	667	700	609	668	532	639	483	829
ENSMUSG00000018199	1920	1388	996	1529	2019	1572	1314	2401	2327	1237
ENSMUSG00000018209	1047	1360	1236	1906	1409	987	1786	1611	1715	1877
ENSMUSG00000018211	1	1	2	7	2	5	0	3	2	1
ENSMUSG00000018217	3031	4152	4339	4062	3359	3822	3399	3642	4726	4006
ENSMUSG00000018238	11242	11249	9403	10937	15990	8779	7766	10233	13184	15919
ENSMUSG00000018239	1177	1010	918	1199	1106	591	843	942	904	1059
ENSMUSG00000018259	20	6	3	5	1	2	10	4	2	23
ENSMUSG00000018263	28	9	8	8	18	20	45	13	4	5
ENSMUSG00000018286	7172	7910	6713	8016	6520	7073	7285	7880	7661	8097
ENSMUSG00000018287	2795	2924	2777	3380	3244	2886	3712	3904	3765	3269
ENSMUSG00000018293	7515	10906	10287	8828	8411	7570	9398	8541	9583	8883
ENSMUSG00000018322	997	1228	939	1054	904	970	1002	1243	1162	1099
ENSMUSG00000018326	4817	4163	4409	3677	4162	4330	4068	4915	4689	6720
ENSMUSG00000018334	117	204	270	203	280	227	226	265	114	339
ENSMUSG00000018339	1512	1497	1703	1233	1367	1414	1245	1164	1407	2049
ENSMUSG00000018340	3059	3827	3718	2966	4202	3827	3476	4419	4246	3772
ENSMUSG00000018341	5	8	4	7	8	7	10	9	5	12
ENSMUSG00000018347	313	363	279	322	287	294	342	311	428	444
ENSMUSG00000018362	4064	6162	6202	7459	10011	6274	6328	6204	6285	7938
ENSMUSG00000018363	1160	940	1274	1358	950	701	1053	1141	1372	1680
ENSMUSG00000018372	930	649	961	556	1014	1024	989	762	805	734
ENSMUSG00000018377	1657	1528	1452	1514	1179	1443	1194	1390	1948	1472
ENSMUSG00000018378	124	207	234	177	318	253	227	251	218	131
ENSMUSG00000018379	3879	3791	3669	3149	2656	2664	2249	3042	2745	4108
ENSMUSG00000018381	37	39	41	62	95	29	27	56	10	33
ENSMUSG00000018387	62	29	93	85	81	67	65	44	127	106
ENSMUSG00000018395	3438	3580	4493	3709	3513	3809	4742	5357	5818	4181
ENSMUSG00000018398	465	421	351	327	203	306	261	379	253	274
ENSMUSG00000018401	1194	1423	1084	1374	1035	1209	1102	1575	984	1396
ENSMUSG00000018405	126	148	175	259	229	324	112	90	166	50
ENSMUSG00000018411	46	30	58	96	13	69	85	24	112	55
ENSMUSG00000018412	1782	2024	2480	2482	2920	2679	2392	3286	3072	3597
ENSMUSG00000018415	3053	2999	3053	2978	2856	2815	3263	3644	2405	2757
ENSMUSG00000018417	5643	4044	5139	5219	5496	4617	3979	3689	4193	6796
ENSMUSG00000018425	3088	2953	3202	2483	2631	2213	2920	3401	3236	3137
ENSMUSG00000018427	2036	1970	2008	2179	1826	1830	2224	2923	3412	2931
ENSMUSG00000018428	547	496	557	564	813	758	586	370	556	579
ENSMUSG00000018433	1631	1722	1825	2462	2155	1884	2194	2822	2782	2433
ENSMUSG00000018442	2166	2180	1989	2065	1905	2232	2179	2478	2569	2655
ENSMUSG00000018446	1467	1323	1669	1405	893	1386	577	870	1163	2956
ENSMUSG00000018449	618	734	807	947	635	851	836	802	872	854
ENSMUSG00000018451	431	698	654	433	635	347	409	593	461	256
ENSMUSG00000018459	19	9	9	12	19	18	28	16	27	21
ENSMUSG00000018470	83	89	28	80	81	111	76	98	156	127
ENSMUSG00000018474	806	821	514	690	571	790	832	576	1130	882
ENSMUSG00000018476	652	1066	946	856	959	1797	1493	1690	1533	2434
ENSMUSG00000018479	5	17	5	13	7	7	5	5	19	13
ENSMUSG00000018481	4025	3694	3488	4631	3303	3767	2778	4231	5448	5011
ENSMUSG00000018486	7	6	4	18	4	13	18	12	14	10
ENSMUSG00000018500	93	48	106	90	92	110	86	67	91	131
ENSMUSG00000018501	4525	4288	4006	4128	3717	3067	3714	5560	5441	4520
ENSMUSG00000018507	47	75	92	69	64	62	44	163	188	9
ENSMUSG00000018509	223	253	218	294	157	155	123	186	250	107
ENSMUSG00000018537	386	374	172	367	440	255	238	529	357	374
ENSMUSG00000018541	536	605	698	706	565	762	753	1030	775	669
ENSMUSG00000018543	1	8	7	8	10	5	6	11	11	11
ENSMUSG00000018547	93	117	188	105	48	177	99	63	117	154
ENSMUSG00000018548	1145	1192	2110	1367	1499	1670	1117	1265	1331	1559
ENSMUSG00000018554	558	732	786	555	547	690	787	773	599	627
ENSMUSG00000018559	432	340	349	406	362	343	253	409	266	284
ENSMUSG00000018565	3171	3661	3010	3214	2790	3632	3667	3987	4221	3563
ENSMUSG00000018566	36	71	106	76	60	27	43	27	56	46
ENSMUSG00000018567	6063	6303	5802	5868	4977	5865	6429	7485	6805	6617
ENSMUSG00000018569	12	31	16	66	69	12	26	54	66	20
ENSMUSG00000018570	46	98	127	67	116	29	66	69	77	80
ENSMUSG00000018572	563	639	482	857	307	494	637	558	713	506
ENSMUSG00000018574	2200	2706	2344	3101	3310	3090	3498	3905	2811	3131
ENSMUSG00000018581	455	326	222	197	114	310	429	205	579	324
ENSMUSG00000018583	5372	5686	5138	4523	4372	4399	4088	5482	5441	7335
ENSMUSG00000018585	1282	1484	1071	1366	1163	1201	1169	1601	1315	1428
ENSMUSG00000018589	35	26	30	20	35	46	55	36	41	56
ENSMUSG00000018593	28087	37158	40861	44417	41125	42275	38296	43986	42449	37438
ENSMUSG00000018595	39	60	20	32	35	15	9	29	2	3
ENSMUSG00000018599	250	276	313	265	176	245	333	278	262	301
ENSMUSG00000018604	369	410	356	422	348	284	409	622	374	533
ENSMUSG00000018620	28	14	19	10	24	61	26	27	25	21
ENSMUSG00000018623	35	32	24	53	6	51	8	53	26	28
ENSMUSG00000018634	3	4	7	49	162	7	10	11	41	29
ENSMUSG00000018648	734	538	428	570	416	385	397	605	650	602
ENSMUSG00000018651	1174	1350	1588	1652	1390	1755	1679	1933	1923	1979
ENSMUSG00000018654	43	87	78	56	4	235	25	14	26	27
ENSMUSG00000018656	9	7	17	7	13	29	29	8	7	17
ENSMUSG00000018659	701	620	1105	1274	919	953	916	1080	618	1295
ENSMUSG00000018661	384	405	370	318	229	307	277	518	312	355
ENSMUSG00000018666	4625	4376	3703	3703	3421	4826	4693	6271	5506	6084
ENSMUSG00000018669	791	1101	1448	1170	1253	1201	1257	1273	925	1067
ENSMUSG00000018672	363	636	759	442	708	534	443	664	495	379
ENSMUSG00000018677	1949	2610	3436	2613	2965	2755	2348	3401	2993	2873
ENSMUSG00000018678	387	523	489	567	466	437	408	599	733	527
ENSMUSG00000018697	1378	1693	1463	1665	1245	1206	1461	1488	1260	1450
ENSMUSG00000018698	5	17	7	3	11	5	13	18	31	35
ENSMUSG00000018707	2331	3433	4698	4147	3689	3403	3108	4143	3815	2945
ENSMUSG00000018727	2118	1960	1533	2191	2144	1582	1966	1529	2688	1652
ENSMUSG00000018733	393	650	731	684	701	1116	714	831	598	595
ENSMUSG00000018736	1970	1589	2297	1987	1728	1407	1362	2367	1547	1949
ENSMUSG00000018740	132	294	164	164	255	171	138	103	208	252
ENSMUSG00000018750	561	581	628	581	404	640	470	767	875	695
ENSMUSG00000018752	109	124	119	42	116	88	85	27	132	80
ENSMUSG00000018761	745	736	809	743	730	795	746	912	887	687
ENSMUSG00000018765	282	324	358	346	347	421	364	483	359	323
ENSMUSG00000018770	7594	6122	5685	6037	5246	5643	5441	6851	7077	8590
ENSMUSG00000018774	77	118	75	103	97	44	80	123	119	65
ENSMUSG00000018776	4	1	2	1	4	6	11	7	1	0
ENSMUSG00000018796	627	1428	1563	1596	1682	1505	1126	1662	1459	484
ENSMUSG00000018800	1325	973	615	686	778	534	984	1384	1632	1150
[truncated: 47,805 more rows]

## Sheet: log2_foldchanges
ensembl gene ID	1h_high	2h30_high	4h_high	6h_high	1h_low	2h30_low	4h_low	6h_low
	log2 Foldchange to 0h_high	log2 Foldchange to 0h_high	log2 Foldchange to 0h_high	log2 Foldchange to 0h_high	log2 Foldchange to 0h_low	log2 Foldchange to 0h_low	log2 Foldchange to 0h_low	log2 Foldchange to 0h_low
ENSMUSG00000000001	-0.27663	-0.19716	-0.28296	-0.14702	0.852827	1.12612	1.22889	1.50584
ENSMUSG00000000003	1.5	0.5	1	0.5	0.666667	0.5	0.833333	1.16667
ENSMUSG00000000028	-0.00026	0.01886	0.19299	-0.16094	0.589641	0.749004	0.743692	0.929615
ENSMUSG00000000031	0.76618	0.51172	0.7798	0.46459	1.21331	1.35916	1.72562	1.22334
ENSMUSG00000000037	-0.13866	0.05079	-0.00774	-0.0534	1.87413	3.34732	2.94639	1.64103
ENSMUSG00000000049	0.9	0.2	0.4	0.5	0.52381	0.904762	0.428571	0.238095
ENSMUSG00000000056	-0.15567	0.19447	0.25667	0.13449	0.941016	0.735935	1.549	1.0118
ENSMUSG00000000058	0.04484	-0.69155	0.20693	-0.16861	0.768	1.146	1.632	1.228
ENSMUSG00000000078	0.22022	0.39389	0.13071	0.39873	1.10434	1.03561	1.17744	1.68916
ENSMUSG00000000085	-0.22072	-0.10424	0.05845	0.16523	0.735192	1.00465	1.16957	1.1777
ENSMUSG00000000088	0.4138	0.30407	0.25278	0.11467	1.02189	1.15118	1.13871	1.44108
ENSMUSG00000000093	0.08761	0.09376	-0.94658	-0.49867	0.721649	1.24742	0.969072	0.938144
ENSMUSG00000000094	-0.03634	-0.0171	-0.04178	0.29738	1	1.75342	1.72603	2.30137
ENSMUSG00000000103	0.6	0.8	0.2	0.8	1.16667	0.333333	1.5	0.333333
ENSMUSG00000000120	0.64849	0.06215	0.21477	0.3012	0.656051	0.840764	1.40764	0.512739
ENSMUSG00000000125	0.25931	0.5	0.357143	-0.08724	2.3125	0.9375	1.0625	0.375
ENSMUSG00000000126	0.11363	0.3822	0.46464	-0.32636	0.803571	0.446429	2.51786	0.839286
ENSMUSG00000000127	0.33593	0.35221	-0.04611	0.16173	1.11268	1.26436	1.17768	1.10726
ENSMUSG00000000131	0.37691	0.56562	0.42324	0.42257	1.20436	1.53015	1.0804	0.946399
ENSMUSG00000000134	-0.04148	-0.09675	0.20985	0.14669	0.744463	0.611584	0.747871	0.71891
ENSMUSG00000000142	-0.18057	-0.20056	-0.81773	-0.56735	1.90283	1.92308	0.736842	1.57895
ENSMUSG00000000148	0.17566	0.20432	0.37818	-0.20091	0.90681	1.26882	0.83871	0.546595
ENSMUSG00000000149	0.05454	-0.19129	-0.08203	-0.17624	1.01259	1.16264	1.10178	1.03882
ENSMUSG00000000154	-0.53886	2.42105	-0.47187	-0.47477	0.205128	0.0512821	1.12821	0.641026
ENSMUSG00000000157	-0.48978	0.20169	-0.07358	-0.3549	0.636364	0.227273	0.318182	0.454545
ENSMUSG00000000159	8	6	7	20	0.4	1.06667	0.6	0.466667
ENSMUSG00000000167	-0.457	-0.1757	-0.44814	0.06027	0.453744	0.69163	0.876652	0.863436
ENSMUSG00000000168	0.17039	0.73518	0.08158	0.35698	0.775771	1.11889	0.922498	0.99699
ENSMUSG00000000171	-0.05605	-0.31261	-2e-05	-0.36546	1.05125	1.26829	1.35958	1.3724
ENSMUSG00000000182	0.428571	0.428571	0.285714	1.14286	1.3	0.5	0.9	1.4
ENSMUSG00000000183	-0.55943	0.315789	0.578947	-0.33947	0.90625	0.6875	0.34375	0.46875
ENSMUSG00000000184	0.63448	0.56815	0.67853	0.81467	0.880649	0.923939	0.501476	0.813999
ENSMUSG00000000194	-0.36493	0.05342	0.01623	0.54286	0.79846	0.946727	0.705392	0.883825
ENSMUSG00000000197	-0.00981	0.56508	-0.12568	0.02952	1.15946	0.624324	0.727027	0.589189
ENSMUSG00000000202	-1.05746	-0.36347	-0.43022	-0.4788	0.5625	0.28125	0.28125	0.8125
ENSMUSG00000000204	-1.01707	-0.78151	-0.20745	0.0932	1.03846	0.307692	1.61538	1.30769
ENSMUSG00000000214	0.16606	0.51567	0.08493	0.32067	1.25593	1.24852	1.22923	0.854599
ENSMUSG00000000215	0.615385	0.692308	0.384615	0.0769231	7	53	13	2
ENSMUSG00000000216	0.571429	0.571429	1.14286	4	0.842105	0.263158	0.105263	0.842105
ENSMUSG00000000223	-0.70593	-0.32847	-0.58226	-0.47551	0.701987	0.827815	1.19868	1.21192
ENSMUSG00000000244	-0.20234	-0.54596	-1.05353	-0.48285	0.594937	1.10127	1.11392	0.987342
ENSMUSG00000000247	-0.50666	-0.52538	-0.48143	-0.30199	1.13043	1.04348	0.73913	0.608696
ENSMUSG00000000248	1.25	0.75	1.375	1.625	1.52	0.84	0.44	0.32
ENSMUSG00000000253	0.17961	0.18646	-0.05907	0.15343	1.46048	1.47218	1.11895	0.933468
ENSMUSG00000000263	0.454545	0.818182	0.727273	0.181818	1.0625	0.34375	0.21875	0.25
ENSMUSG00000000266	0.36907	0.03785	-0.03766	-0.05558	1.22433	1.73764	1.89734	1.53612
ENSMUSG00000000275	-0.12487	-0.43956	0.09034	-0.19414	1.16327	1.16484	0.943485	1.61068
ENSMUSG00000000276	0.69593	0.08428	-0.16655	0.027	2.28929	2.38571	2.11071	1.01786
ENSMUSG00000000278	0.02098	0.16764	0.09294	0.03676	1.02217	1.1152	1.25376	0.899842
ENSMUSG00000000282	0.17307	0.13863	-0.32418	0.1009	0.761194	1.33955	0.820896	1.39925
ENSMUSG00000000290	0.62965	0.44479	0.40106	0.05839	0.252632	0.536842	1.27368	0.336842
ENSMUSG00000000295	-0.01125	-0.26832	0.0325	-0.29265	0.820079	0.978003	1.1286	1.26678
ENSMUSG00000000296	-0.02602	-0.20636	0.31455	-0.11653	1.22913	1.45547	1.42486	1.70965
ENSMUSG00000000301	0.21459	0.08212	0.10128	0.37191	1.19403	1.0995	0.875622	0.965174
ENSMUSG00000000303	-0.3599	0.06386	0.0484	-0.34206	0.853107	1.14124	1.30226	1.4209
ENSMUSG00000000305	-0.00344	0.37236	-0.39626	0.10545	2.54902	1.21569	0.352941	2.09804
ENSMUSG00000000308	1.36364	0.636364	0.454545	0.454545	0.8125	0.25	0.625	0.625
ENSMUSG00000000317	0.48094	-0.18121	0.56082	0.175	0.939394	1.25253	1.0202	1.19192
ENSMUSG00000000318	-0.39153	-0.47085	-0.45916	-0.64523	1.34545	1.46364	1	1.17273
ENSMUSG00000000320	0.12704	0.00864	0.46487	0.51032	1.09615	0.625	1.66346	1.64423
ENSMUSG00000000325	0.50032	0.5375	0.51401	0.25151	1.235	1.295	1.355	1.14
ENSMUSG00000000326	-0.42888	-0.61453	-0.47829	-0.67047	0.794479	1.79908	1.38574	2.86887
ENSMUSG00000000339	0.56722	0.20363	0.43406	0.41663	0.898671	1.35382	0.873754	1.87375
ENSMUSG00000000340	0.31704	-0.38413	0.23628	-0.20858	0.890836	0.725067	0.633423	1.14016
ENSMUSG00000000346	0.32282	0.59984	0.62371	0.21323	0.920859	1.0155	1.05293	0.772665
ENSMUSG00000000355	0.04827	-0.12572	0.01544	-0.37418	1.17281	1.41423	1.24396	1.3202
ENSMUSG00000000359	1.12648	0.9733	1.10426	1.04472	1.176	0.7	0.952	0.408
ENSMUSG00000000365	-0.24873	0.07396	-0.30396	-0.1534	1.16678	2.0197	1.42083	0.840253
ENSMUSG00000000374	0.2587	0.43304	0.50587	0.06331	0.902778	0.9375	1.99653	0.982639
ENSMUSG00000000378	0.28417	0.46004	0.07406	0.56386	0.822951	0.868852	1.42295	1.17705
ENSMUSG00000000381	7	3	0	1	1	0.833333	0.166667	0.333333
ENSMUSG00000000384	0.13596	0.6334	0.5222	0.21521	1.02108	1.68675	1.7741	1.14157
ENSMUSG00000000385	0.10164	4.85714	0.12171	0.65142	0.789474	0.578947	0.578947	0.578947
ENSMUSG00000000386	-0.29202	-0.08711	0.69885	0.90198	0.666667	1.21212	0.454545	1
ENSMUSG00000000392	0.62679	0.02319	-0.41864	-0.54221	0.697581	0.822581	1.50806	1.08065
ENSMUSG00000000394	0	1	0.333333	0.333333	0.75	0.5	0.75	1
ENSMUSG00000000399	0.0726	0.10839	0.11344	-0.03437	0.94404	1.27932	1.181	0.945621
ENSMUSG00000000402	-0.58193	0.22735	0.0322	-0.13358	0.575269	0.645161	1.12366	0.569892
ENSMUSG00000000409	0.05752	0.02916	0.08953	0.64291	1.32812	0.984375	0.171875	0.953125
ENSMUSG00000000411	2	0	8	1	1.4	0.4	0.6	0.2
ENSMUSG00000000416	0.40352	0.64515	0.3294	0.47891	1.09128	1.3854	1.28803	0.878296
ENSMUSG00000000420	0.0215	0.16039	-0.26495	-0.23595	1.24485	1.6369	1.41806	1.22375
ENSMUSG00000000435	0.20411	0.27545	0.42183	0.41654	0.736842	0.315789	0.315789	4.42105
ENSMUSG00000000439	0.22387	0.67041	0.28605	0.10866	0.885153	0.771305	0.86285	0.649467
ENSMUSG00000000440	0.05244	0.17685	0.07849	-0.17992	0.116071	0.0848214	0.209821	1.26786
ENSMUSG00000000441	-0.58617	-0.45561	-0.32895	-0.17978	0.653575	0.92145	0.854985	1.40181
ENSMUSG00000000486	0.44388	0.4937	0.78226	0.9126	0.668966	1.07586	0.668966	0.731034
ENSMUSG00000000489	-0.29505	-0.60858	0.20769	-0.36548	0.677033	0.641148	0.334928	0.413876
ENSMUSG00000000530	0.32694	-0.28129	1.04818	1.13233	0.542735	0.162393	0.696581	1.05556
ENSMUSG00000000531	0.45839	0.05453	-0.22607	-0.3421	0.836066	0.688525	0.540984	1.16393
ENSMUSG00000000532	0.02564	-0.01008	0.50016	0.19049	0.567857	0.832143	1.17143	1.22857
ENSMUSG00000000538	0.04785	0.47171	0.54251	0.24373	1.18977	1.37583	0.934025	0.912528
ENSMUSG00000000544	0.1	1.7	0.3	1.2	0.608696	0.0869565	0.26087	0.304348
ENSMUSG00000000552	0.37228	0.2052	0.69731	0.35273	0.655172	1.37931	1.17241	2.03448
ENSMUSG00000000555	0.24809	0.54014	0.22759	0.70256	0.862963	0.898148	0.962963	0.92037
ENSMUSG00000000560	-0.2372	-0.70864	-0.6124	-0.1356	0.763889	0.861111	0.972222	0.486111
ENSMUSG00000000561	-0.17355	0.17893	0.46488	0.58823	0.822713	0.756827	0.937581	1.57781
ENSMUSG00000000562	0.01679	-0.12438	0.03675	0.42564	1.33333	0.875	1	0.75
ENSMUSG00000000563	-0.10162	-0.16526	-0.17575	-0.31615	1.16313	1.28863	1.45369	1.35676
ENSMUSG00000000567	0.23255	-0.12381	-0.09152	-0.17127	1.05505	1.6055	1.72477	1.62385
ENSMUSG00000000568	-0.03275	-0.45325	-0.21148	-0.25379	1.06162	1.48139	1.21117	1.48267
ENSMUSG00000000579	-0.57095	0.43504	-0.00187	0.1788	2.29532	3.10234	3.95906	1.26901
ENSMUSG00000000581	0.18507	0.12373	0.19496	-0.00784	1.13985	1.29716	1.26926	1.09773
ENSMUSG00000000594	0.39886	0.66493	0.2566	0.46405	0.865451	1.30871	1.1619	1.24741
ENSMUSG00000000600	-0.11847	-0.08607	-0.10117	-0.13912	0.848291	1.14744	1.21368	1.31795
ENSMUSG00000000605	0.21856	0.49153	0.4611	0.71757	0.994851	0.897528	1.13234	1.32956
ENSMUSG00000000606	0.625	0.375	0.875	0.75	1.6	1.4	0.4	0.2
ENSMUSG00000000617	1.125	0.625	0.875	1.125	2.23077	0.538462	0.615385	0.461538
ENSMUSG00000000627	0.50465	0.12874	0.56128	0.24309	5.33333	2.58333	0.5	1.25
ENSMUSG00000000628	0.10548	-0.09242	-0.07604	0.3221	1.01657	0.635359	1.53591	1.95028
ENSMUSG00000000631	0.29987	0.18172	0.81075	1.2363	0.877979	1.0429	0.914204	1.40038
ENSMUSG00000000632	-0.31784	-0.80519	-0.77221	-0.80058	0.451613	0.580645	0.548387	0.741935
ENSMUSG00000000673	0.65386	0.6	0.76175	0.5629	17	13	7.5	2
ENSMUSG00000000682	-0.27688	-0.54588	-0.48876	-0.42195	0.960784	0.176471	0.45098	0.745098
ENSMUSG00000000686	-0.67144	-0.54699	-0.41252	-0.77079	1.21429	3.5	1.85714	2.42857
ENSMUSG00000000690	0.333333	0.666667	2.11111	0.222222	1.11111	1.77778	0.666667	2.22222
ENSMUSG00000000693	0.63865	0.58833	0.53128	0.11635	0.927083	1.01042	1.55208	1.55208
ENSMUSG00000000701	2.75	0.75	2.5	1	1.09091	0.727273	0.636364	2.09091
ENSMUSG00000000706	0.2861	0.15796	-1.82712	-1.0832	0.533333	0.133333	4.15	1.06667
ENSMUSG00000000708	-0.24055	-0.31454	-0.17748	-0.18231	0.632826	0.964467	0.920474	0.832487
ENSMUSG00000000711	0.23318	0.34622	0.11165	0.10611	0.665185	1.02519	0.83358	0.842963
ENSMUSG00000000724	0.666667	1.16667	0.833333	1.66667	1.21053	0.789474	0.947368	0.578947
ENSMUSG00000000730	0.33773	-0.55601	-0.36475	-0.26379	0.842105	0.578947	0.736842	1.05263
ENSMUSG00000000731	-0.46713	-0.4384	-0.49693	-0.22848	1.92308	1.23077	2.07692	0.923077
ENSMUSG00000000732	0.06629	-0.06863	0.31472	-0.0312	0.370766	0.552585	0.789661	1.07487
ENSMUSG00000000738	-0.31077	-0.49146	-0.57687	-0.25098	1.02867	1.07527	0.824373	0.921147
ENSMUSG00000000739	0.40936	0.23262	0.49541	0.30165	1.2987	1.75974	1.22403	1.52273
ENSMUSG00000000740	-0.47699	-1.16184	-0.77344	-1.13259	1.08315	1.12297	0.807522	3.13551
ENSMUSG00000000743	0.26593	1.05575	0.38662	0.85751	0.654779	0.699477	0.969092	0.734665
ENSMUSG00000000751	0.07129	0.35498	0.28999	0.15612	0.863537	0.966036	0.98605	0.908054
ENSMUSG00000000753	0.33345	0.2689	0.19566	0.29032	0.978926	0.761547	1.29879	1.11288
ENSMUSG00000000759	0.26647	0.49635	0.48305	0.41723	1.18819	1.05996	1.73708	1.19557
ENSMUSG00000000766	-1.23646	-0.60953	-1.38131	-1.06223	1.34483	0.241379	1.13793	3.24138
ENSMUSG00000000776	0.13012	0.09805	-0.27934	0.05754	1.09313	0.894656	0.938931	0.934351
ENSMUSG00000000782	0.1179	-0.50631	-0.05199	-0.13257	0.995907	1.4161	1.50205	1.47203
ENSMUSG00000000787	-0.22255	-0.37252	-0.35743	-0.66519	0.86699	1.04783	1.15501	0.96875
ENSMUSG00000000791	0.8	0.9	1	1.7	1.05263	0.894737	0.578947	0.263158
ENSMUSG00000000792	1	0.428571	1.85714	1.57143	1.2	1.2	1.4	0.8
ENSMUSG00000000794	0.23814	0.70441	0.67449	0.84631	1.12987	0.545455	0.909091	1.5974
ENSMUSG00000000804	0.12129	-0.01868	-0.07458	-0.01023	1.0687	1.01135	1.08065	1.12127
ENSMUSG00000000805	0.272727	0.272727	0.454545	0.181818	1	0.25	0.75	0.75
ENSMUSG00000000811	-0.11679	-0.10736	-0.23681	-0.30475	0.918919	0.971171	0.974775	1.09189
ENSMUSG00000000817	3	0.5	1.5	0.5	2	1.5	0.5	7.5
ENSMUSG00000000823	0.26447	-0.13715	0.0023	0.26191	0.851256	1.24372	1.57789	1.41005
ENSMUSG00000000826	0.29743	0.19705	0.3516	0.65214	1.00615	1.41404	1.39233	1.05103
ENSMUSG00000000827	0.27128	0.42382	0.41903	0.28664	0.856682	0.95636	0.852219	0.82544
ENSMUSG00000000838	-0.16938	-0.04926	-0.13451	-0.28927	1.19314	1.34494	1.58433	1.34548
ENSMUSG00000000861	-0.037	-0.46501	0.22531	-0.05827	0.706612	0.582645	1.26584	1.62534
ENSMUSG00000000869	0.04477	0.16929	0.00425	-0.0916	1.375	1.66667	1.95833	2.08333
ENSMUSG00000000876	0.16935	0.26887	-0.08149	0.03778	1.20574	0.869219	0.947368	1.20893
ENSMUSG00000000881	0.39098	0.32649	0.13639	0.42613	1.57651	1.14591	1.3879	0.530249
ENSMUSG00000000884	0.93855	0.94316	0.68434	0.56129	0.411602	0.346685	0.785912	0.46547
ENSMUSG00000000889	-1.84137	-1.38763	-0.87627	-0.63989	0.05	2.7	1.4	1.65
ENSMUSG00000000901	0.2286	0.62586	0.18911	0.39424	0.82613	0.992141	1.17976	1.44745
ENSMUSG00000000902	0.08863	0.28987	0.18109	0.14181	1.20113	1.14088	1.27273	1.02603
ENSMUSG00000000903	-0.71766	-0.45292	-0.1728	-0.77516	1.52941	1.82353	1.17647	1.64706
ENSMUSG00000000915	1.11975	1.26622	1.01931	1.2622	1.01355	0.580833	1.02614	0.516941
ENSMUSG00000000916	0.54758	0.89901	0.70429	0.76131	0.701474	0.621622	0.716216	0.808354
ENSMUSG00000000934	-0.02361	0.55123	0.58305	0.6251	0.935821	1.2791	1.13881	1.35373
ENSMUSG00000000938	-0.19147	-0.57483	0.32821	0.01576	1.44444	1.61111	2.83333	0.5
ENSMUSG00000000942	-0.30656	0.148148	-0.58664	-0.95127	1.21429	0.285714	0.857143	0.428571
ENSMUSG00000000948	0.31649	0.93366	0.64867	0.73745	1.17188	1.13021	0.875	0.661458
ENSMUSG00000000957	0.59638	0.49973	0.41288	0.4794	0.74812	0.581096	0.962406	1.1015
ENSMUSG00000000958	0.10027	-0.44991	0.46777	-0.03453	0.585616	0.763699	0.756849	0.527397
ENSMUSG00000000959	0.29239	0.02576	0.42288	0.24865	0.792127	0.820433	0.914197	1.07077
ENSMUSG00000000976	0.11164	0.37537	0.26716	0.58383	0.535444	0.982106	0.886442	1.05506
ENSMUSG00000000982	-0.26422	0.02765	0.33933	0.08783	2	4	10.5	3.5
ENSMUSG00000000983	4.25	0	1.5	1	3.25	2	2	1.5
ENSMUSG00000001014	-0.94201	-0.9094	-0.71879	-0.69776	0.25	0.1875	1.09375	0.65625
ENSMUSG00000001016	0.08411	0.24267	0.35292	0.39314	1.05853	1.31193	1.3294	1.21847
ENSMUSG00000001017	-0.02646	0.04283	-0.16958	-0.07034	0.881092	1.18064	1.0026	1.4178
ENSMUSG00000001018	0.3538	0.40769	0.16967	0.10857	0.844667	1.21	1.36	1.47733
ENSMUSG00000001020	0.41776	2.33333	1.16667	0.63181	3.28571	1.57143	4	0.571429
ENSMUSG00000001021	0.55237	0.836	0.92271	0.75654	0.432836	2.10448	0.208955	2.02985
ENSMUSG00000001023	2	0	0	0	3	0	0	1
ENSMUSG00000001025	0.46172	0.23595	0.26573	0.08561	0.669202	1.01141	1.36122	1.18251
ENSMUSG00000001027	0.05565	0.04553	0.92414	0.60754	1.30233	0.186047	0.186047	0.767442
ENSMUSG00000001029	0.87183	-0.46596	0.48837	0.5559	0.909722	0.673611	0.833333	1.56944
ENSMUSG00000001034	-0.36631	0.47822	0.28521	0.56633	0.902069	1.26345	0.64	0.731034
ENSMUSG00000001036	0.1325	0.01548	-0.0577	0.28215	0.97549	1.03676	0.943627	1.17437
ENSMUSG00000001039	0.12995	-0.13645	-0.05451	-0.32807	0.762523	1.03711	1.04638	0.667904
ENSMUSG00000001052	0.25614	0.4886	0.18919	0.50054	1.07411	1.05632	1.24308	1.24605
ENSMUSG00000001053	-0.4762	-0.69412	-0.17585	-0.67877	0.8	0.538462	0.553846	0.892308
ENSMUSG00000001054	0.12824	-0.3659	0.07184	0.06966	1.24055	1.26804	1.85223	3.04124
ENSMUSG00000001056	-0.08064	-0.37855	-0.08197	-0.27286	1.04708	1.06167	1.01393	1.32493
ENSMUSG00000001062	-0.45569	-0.44282	-0.4267	-0.34504	1.15901	1.38869	1.5053	1.18021
ENSMUSG00000001065	0.54003	0.21916	0.32781	0.50561	4.26923	4.73077	8.36538	2.75
ENSMUSG00000001076	0.428571	0.142857	0.571429	1.28571	0.5	0.285714	0.142857	0.571429
ENSMUSG00000001082	-0.06668	0.47892	0.35473	0.42532	0.779392	1.55746	0.908851	1.38441
ENSMUSG00000001089	0.63347	0.86969	0.80555	1.54729	0.76269	1.02241	1.12854	1.20567
ENSMUSG00000001095	-0.38115	-0.58011	-0.14219	-0.26699	0.733333	0.4	1.6	0.133333
ENSMUSG00000001098	0.35629	0.413	0.33689	0.171	1.05537	0.821272	1.25692	1.22827
ENSMUSG00000001100	0.1978	0.14769	0.0333	-0.16414	0.824025	1.05058	0.875659	1.25184
ENSMUSG00000001103	0.09967	-0.50853	0.61879	-0.32792	0.242857	0.485714	0.871429	0.857143
ENSMUSG00000001105	-0.01658	-0.11177	0.03506	-0.20612	1.18938	1.50965	1.47165	1.44692
ENSMUSG00000001119	0.21003	0.34116	-0.17324	0.2108	0.628529	0.920187	1.09297	1.33984
ENSMUSG00000001120	0.31758	0.72066	0.2672	0.23539	1.05453	0.938272	0.958848	0.661523
ENSMUSG00000001123	0.11355	-0.33006	0.24448	0.65978	0.837838	1.09091	1.14373	1.30221
ENSMUSG00000001127	0.16082	0.05768	0.1492	-0.01878	1.16476	1.38512	1.29354	1.07032
ENSMUSG00000001128	0.30736	0.05845	0.55556	0.29383	0.517241	0.873563	1.05747	0.609195
ENSMUSG00000001131	0.2677	-0.05452	0.12467	-0.26246	1.13786	1.59671	1.49383	1.52675
ENSMUSG00000001134	0.06597	0.21716	0.09601	0.09526	1.34812	1.73171	1.37472	1.64302
ENSMUSG00000001138	0.30169	0.187	0.21623	0.2704	0.953177	0.877926	0.729097	1.32609
ENSMUSG00000001143	0.35154	0.39228	0.44092	0.01801	1.19456	0.861895	0.768145	1.1371
ENSMUSG00000001150	-0.21931	0.14798	0.57344	0.67697	0.78	0.896364	1.24273	1.29545
ENSMUSG00000001151	0.13688	-0.18002	-0.45352	0.06121	0.678773	0.638071	0.50407	0.917971
ENSMUSG00000001155	1	0.2	4.8	2.2	0.904762	0.619048	0.285714	0.904762
ENSMUSG00000001156	-0.18949	0.78937	0.7728	0.8715	1.31553	1.39563	1.65534	1.42961
ENSMUSG00000001157	-0.2918	-0.66289	-0.32018	-0.66055	0.675037	0.797637	0.818316	1.34712
ENSMUSG00000001158	0.0746	-0.08782	0.08752	-0.25466	1.15591	1.44256	1.43654	1.49672
ENSMUSG00000001166	0.41092	0.82132	0.52739	0.45191	0.858135	0.908629	1.09778	0.775937
ENSMUSG00000001168	0.14047	0.2297	-0.01205	-0.35944	1.04859	1.08604	1.1992	0.787319
ENSMUSG00000001173	-0.20977	-0.11463	-0.09328	-0.47683	1.03838	1.38382	1.61411	1.41701
ENSMUSG00000001175	0.08309	-0.04983	-0.10755	-0.22772	1.02615	1.14096	1.17766	1.26701
ENSMUSG00000001211	0.28044	0.02426	0.24176	-0.05546	0.902412	0.787281	0.968202	1.03947
ENSMUSG00000001225	-0.18624	0.06019	-0.0255	0.20385	1.2449	0.693878	0.530612	0.877551
ENSMUSG00000001227	0.75	1.75	1.5	0.5	1.11765	1.70588	1.58824	0.647059
ENSMUSG00000001228	-0.14222	-0.13333	-0.34693	-0.36894	0.949448	1.2853	1.49853	1.40888
ENSMUSG00000001229	0.05086	-0.08495	-0.00891	-0.16346	0.59867	1.26386	0.81153	0.804878
ENSMUSG00000001240	0.51061	0.38391	0.29679	-0.06464	1.18348	0.933171	1.12029	1.35601
ENSMUSG00000001247	-0.12482	0.23642	-0.21252	0.2663	0.701449	1.08406	0.831884	0.843478
ENSMUSG00000001248	-0.07456	0.00031	0.12651	0.02352	0.909408	0.571429	1.05226	1.64111
ENSMUSG00000001249	0.4913	0.90658	0.82468	0.80816	1.85714	1.28571	8.35714	0.857143
ENSMUSG00000001260	-0.13504	-0.27795	-0.40789	-0.25197	1.04918	0.836066	0.622951	0.459016
ENSMUSG00000001270	0.27876	0.40112	0.47168	0.33706	1.04205	0.88155	0.919517	0.729683
ENSMUSG00000001280	0.21515	0.64394	0.39089	0.05942	1.22611	0.653213	1.20593	0.696458
ENSMUSG00000001281	-0.07045	0.3783	0.50584	-0.02848	0.153846	0.410256	2.46154	0.897436
ENSMUSG00000001285	0.06083	-0.03769	-0.03063	-0.11744	1.14214	1.10224	1.45885	1.05237
ENSMUSG00000001288	1.65904	1.08454	1.81015	1.84316	1.7	0.866667	0.866667	1.36667
ENSMUSG00000001289	0.19433	0.01438	0.26609	-0.05301	1.03772	1.26821	1.18794	1.16812
ENSMUSG00000001300	0.06085	-0.22165	-0.16893	-0.35484	1.11692	2.64801	1.65796	1.79353
ENSMUSG00000001305	-0.01954	-0.27887	0.26092	0.0448	0.695073	0.972037	1.33422	1.21704
ENSMUSG00000001313	0.06418	0.25214	-0.07731	0.1584	1.12927	1.57652	0.662704	0.637444
ENSMUSG00000001323	-0.19379	-0.11549	-0.20421	0.19936	0.863928	1.18614	1.19641	0.96534
ENSMUSG00000001333	-0.16744	0.722222	-0.50865	-0.0313	1.26087	1.56522	0.434783	0.652174
ENSMUSG00000001334	0.30627	0.17082	-0.03083	0.00682	1.1594	1.77958	1.33873	1.38605
ENSMUSG00000001348	0.18879	-0.55246	-0.58886	-0.59365	1.05556	1.30556	1.56481	1.2037
ENSMUSG00000001349	-0.1146	-0.32703	-0.3348	-0.23322	4.53125	4.0625	4.28125	3.75
ENSMUSG00000001366	-0.29438	-0.21907	-0.02099	-0.2923	1.43103	1.33005	1.92365	1.91133
ENSMUSG00000001376	0.06333	0.03955	0.00904	-0.18482	1.00602	1.17168	1.04412	1.11272
ENSMUSG00000001380	-0.04998	0.0854	0.08431	-0.04069	1.17923	1.10561	1.04952	1.10911
ENSMUSG00000001383	0.05798	0.13722	0.14073	0.01362	0.937801	1.16731	1.1731	1.11427
ENSMUSG00000001403	0.27013	0.28694	0.16319	-0.03906	1.20965	1.22017	1.28655	1.30274
ENSMUSG00000001415	-0.20347	-0.17006	0.10345	0.21491	1.05085	1.48305	0.883475	1.30508
ENSMUSG00000001416	0.04707	0.05468	-0.04117	-0.05035	0.942636	1.1848	0.905603	1.03364
ENSMUSG00000001418	0.34908	0.24795	0.237	0.01786	1.09265	1.40306	1.32187	0.945559
ENSMUSG00000001419	0.70762	0.60448	0.73914	0.8781	0.78415	0.965589	0.967675	0.870699
ENSMUSG00000001420	-0.23636	-0.27816	-0.08742	-0.04878	0.351351	0.527027	0.540541	0.513514
ENSMUSG00000001424	0.40651	0.75434	0.43836	0.60313	1.11476	0.687064	0.684451	0.631315
ENSMUSG00000001435	0.41012	0.67602	0.68399	0.29899	1.37232	1.58253	0.861214	1.05996
ENSMUSG00000001436	0.17138	0.21492	0.6383	0.21366	0.778401	1.1122	0.959327	1.02665
ENSMUSG00000001440	-0.03325	-0.01779	-0.22192	-0.10832	0.905899	0.950375	0.856976	1.01685
ENSMUSG00000001441	0.17344	0.32117	0.25314	0.47535	0.868565	1.023	1.05805	1.41621
ENSMUSG00000001444	0.25	0.5	0.375	0	2.4	1.6	0.4	1
ENSMUSG00000001445	0.24058	0.20995	0.29124	0.6574	1.04189	1.02513	0.737243	0.935263
ENSMUSG00000001467	-0.00081	0.11435	-0.29056	-0.17359	0.78085	1.04855	1.03439	0.727579
ENSMUSG00000001472	0.27822	0.46121	0.34102	0.32481	1.10708	1.12578	1.19707	1.07129
ENSMUSG00000001473	0.17833	-0.19419	-0.09558	0.26023	0.540608	0.846039	0.874938	1.20179
ENSMUSG00000001482	0.16356	0.28397	0.38033	0.20259	0.678125	1.13125	0.898438	0.58125
ENSMUSG00000001493	-0.07466	0.10276	-0.19873	0.22836	2.96154	2.11538	0.692308	3.19231
ENSMUSG00000001494	0.375	0.375	1.125	0.375	2.16667	0.5	0.666667	0.333333
ENSMUSG00000001496	0.3	0.3	0.4	0.5	1.1	0.4	1.2	0.8
ENSMUSG00000001497	-0.72605	-0.00132	-0.56917	-0.09428	1.03448	0.362069	1.49138	1.06897
ENSMUSG00000001504	0.12913	0.24218	-0.34216	-0.11048	0.78626	0.793893	0.534351	0.442748
ENSMUSG00000001506	0.65202	0.4046	0.32749	0.40181	0.701016	1.13839	1.03961	1.83567
ENSMUSG00000001507	-0.24541	0.15754	0.34957	-0.17479	0.873457	0.95679	1.21296	0.774691
ENSMUSG00000001508	0.454545	0.636364	1.18182	1.27273	1.16667	0.666667	2.83333	2
ENSMUSG00000001510	1	0	1.6	0.6	1.57143	0.285714	1	0.714286
ENSMUSG00000001517	0.16119	0.492	-0.09357	-0.04606	0.626459	0.959144	1.11479	0.826848
ENSMUSG00000001518	-0.12194	-0.05285	-0.0204	-0.11991	1.44909	1.75091	1.58727	1.23273
ENSMUSG00000001520	0.24667	0.31962	-0.12735	0.05216	0.897544	0.580017	1.04234	0.931414
ENSMUSG00000001521	0.0445	-0.06275	0.03261	0.05025	1.10855	1.97691	1.82679	1.98614
ENSMUSG00000001524	0.60335	0.40888	0.75124	0.13119	1.14327	1.11111	1.00585	0.853801
ENSMUSG00000001525	0.04814	0.18172	0.0641	0.37362	0.746266	1.10796	1.32784	1.71605
ENSMUSG00000001542	-0.59994	-0.12842	-0.03178	-0.11367	1.81926	1.79111	1.54074	0.957037
ENSMUSG00000001552	0.46056	0.04165	0.37144	-0.11471	1.1269	1.66811	1.93818	1.2256
ENSMUSG00000001555	0.60361	0.73607	0.66727	0.77881	0.813387	1.04144	1.36048	0.857433
ENSMUSG00000001558	0.25706	0.16504	-0.0506	0.63569	0.768293	1.21951	1.43902	0.914634
ENSMUSG00000001566	0.428571	0.428571	0.571429	0.571429	1.33333	0.888889	1.11111	0.888889
ENSMUSG00000001569	0.20107	0.35369	0.05643	0.24568	1.38963	1.57778	1.32296	2.00296
ENSMUSG00000001576	0.06025	0.15165	0.22211	0.41809	1.14214	1.36326	1.20532	1.15794
ENSMUSG00000001583	-0.15217	0.1164	0.74597	0.28612	0.333333	0.625	2.375	0.5
ENSMUSG00000001588	-0.28668	-0.32946	0.04834	-0.16978	0.692308	1.26923	0.730769	0.538462
ENSMUSG00000001604	0.25348	0.23159	0.46476	0.47104	0.620352	0.733855	1.24462	1.11546
ENSMUSG00000001622	0.14621	0.75	0.316	-0.00865	1.54545	0.636364	1.27273	1.81818
ENSMUSG00000001627	-0.37515	-0.49995	-0.52349	-0.52164	0.92482	1.03399	0.933059	1.05767
ENSMUSG00000001630	-0.09573	0.00383	0.14951	-0.05508	1.36215	1.58044	1.28707	1.30726
ENSMUSG00000001632	0.36143	-0.4864	-0.2228	0.06401	1.53018	1.36483	1.29659	2.51706
ENSMUSG00000001642	-0.17627	-0.12885	-0.04642	-0.16184	0.827231	0.943813	0.905303	0.976431
ENSMUSG00000001655	-0.19552	0.611111	0.00938	-0.29351	0.95	1.7	0.85	1.1
ENSMUSG00000001656	1	2	1	1	3	1.33333	1	0
ENSMUSG00000001657	0.01309	0.08825	-0.13701	-0.20725	1.37154	1.42688	1.16996	1.55336
ENSMUSG00000001661	0.1722	0.23226	0.15457	0.26858	0.876289	1.71134	1.45361	1.43299
ENSMUSG00000001663	0.10532	0.42591	0.36005	-0.54018	0.759326	0.872443	0.663057	0.646209
ENSMUSG00000001665	0.32632	0.63377	-0.19042	0.67738	0.768889	1.36444	0.964444	0.688889
ENSMUSG00000001666	-0.11303	-0.18097	-0.04431	-0.59148	0.903448	1.08276	1.01839	1.0069
ENSMUSG00000001670	1.5	0.833333	0.5	1.66667	1.13333	0.8	0.666667	0.8
ENSMUSG00000001672	0.555556	0.0555556	0.333333	0.777778	0.607143	0.357143	0.107143	0.214286
ENSMUSG00000001674	-0.00818	-0.0507	0.07174	-0.25096	0.999397	0.97889	0.941496	1.16285
ENSMUSG00000001687	-0.00786	-0.06289	0.1767	0.0902	0.895641	1.10832	0.867019	1.21356
ENSMUSG00000001700	-1.0774	-0.29717	-0.56064	-0.08045	0.972299	1.37396	0.734072	1.06094
ENSMUSG00000001707	0.07558	-0.17449	0.05615	-0.11457	1.06824	1.21024	0.894631	0.989965
ENSMUSG00000001729	0.40374	0.54333	0.71426	0.47205	0.635209	1.05172	1.05626	0.963702
ENSMUSG00000001739	-0.66179	-0.44037	0.20966	-0.40582	0.390244	0.987805	1.19512	0.865854
ENSMUSG00000001741	0.32804	0.02318	0.09504	-0.12508	0.627273	0.7	0.472727	0.654545
ENSMUSG00000001750	0.24939	0.58231	0.38301	0.64928	1.30357	1.33214	1.71786	0.9
ENSMUSG00000001751	-0.11205	0.3032	-0.04436	0.36683	1.20968	1.00269	0.739247	1.05108
ENSMUSG00000001755	-0.03849	0.67449	0.06988	0.08055	1.10738	0.748373	0.869848	0.922993
ENSMUSG00000001761	-0.20108	-0.35104	-0.11061	-0.31621	0.829208	1.49876	1.10767	1.28465
ENSMUSG00000001763	-0.01142	-0.04852	-0.26992	-0.03209	0.57764	0.813665	0.490683	1.00621
ENSMUSG00000001767	0.09709	0.27839	0.42659	-0.02319	0.741656	1.09479	0.787049	0.829773
ENSMUSG00000001768	0.13514	0.02859	-0.19662	-0.13654	0.965887	1.08727	1.18604	1.07061
ENSMUSG00000001773	0.214286	1.42857	0.642857	1	0.318182	0.409091	0.590909	0.25
ENSMUSG00000001774	-0.12046	0.34428	0.24865	0.19451	0.665373	1.11729	0.821906	1.0953
ENSMUSG00000001783	-0.10006	-0.10084	0.09468	0.24219	0.818257	0.768036	0.922031	0.877358
ENSMUSG00000001785	-0.11264	0.30425	0.24202	0.04707	0.889942	1.03627	1.0066	1.18302
ENSMUSG00000001786	-0.04455	0.44619	0.51779	0.23059	0.856242	1.49937	1.01261	1.02774
ENSMUSG00000001794	0.03307	-0.10349	-0.14389	-0.20258	1.56098	1.41294	1.50982	1.32588
ENSMUSG00000001802	0.33423	0.33889	0.45054	0.26955	1.67816	1.82759	1.06897	1.12644
ENSMUSG00000001804	2.33333	1.66667	2.33333	2.66667	0.894737	0.684211	0.315789	0.368421
ENSMUSG00000001815	1.33333	2.33333	3	4.33333	0.9375	0.5	0.5	1.125
ENSMUSG00000001819	2	1	0.5	2	0.6	0.4	0.2	0.1
ENSMUSG00000001823	0.3	0.4	0.8	0.6	0.588235	0.352941	0.294118	0.411765
ENSMUSG00000001827	0.77534	0.34825	-0.53163	0.07223	1.56489	0.839695	1.34606	0.844784
ENSMUSG00000001829	0.23409	0.49543	0.32064	0.46479	0.845519	0.992335	1.13915	0.762382
ENSMUSG00000001833	0.06492	-0.10875	-0.04974	-0.07345	0.993261	1.36114	1.24269	1.12241
ENSMUSG00000001844	0.61269	0.47427	0.69579	0.60407	1.09862	0.828402	1.24951	0.999014
ENSMUSG00000001847	0.02867	-0.32691	-0.14917	-0.3638	0.875965	1.43275	1.1323	1.56615
ENSMUSG00000001855	-0.0051	-0.41762	-0.227	-0.39363	0.826502	1.64907	1.45761	1.40258
ENSMUSG00000001864	0.38975	0.98197	0.79163	0.70042	0.49912	0.799296	0.455986	1.34331
ENSMUSG00000001865	0.73468	-0.12027	-0.04735	0.09936	1.19048	1.02381	4.88095	0.166667
ENSMUSG00000001870	0.0428	-0.27325	-0.21545	-0.11122	1.01848	0.876443	0.916859	1.12009
ENSMUSG00000001891	-0.25826	-0.49349	-0.66929	-1.07509	0.847099	1.39136	1.68403	1.17281
ENSMUSG00000001901	-0.25462	0.785714	-0.44471	0.38642	1.55	0.85	0.4	1.25
ENSMUSG00000001909	0.15615	0.57601	0.2196	0.49391	0.854118	0.895882	0.808235	0.682941
ENSMUSG00000001910	0.00361	0.06721	0.04343	-0.4402	0.879339	1.4	0.963636	0.818182
ENSMUSG00000001911	-0.13012	-0.27832	-0.58686	-0.90523	0.672684	1.18051	0.7858	1.02286
ENSMUSG00000001918	0.23472	-0.28076	0.33364	0.08589	0.94382	1.50562	1.82022	0.94382
ENSMUSG00000001924	0.0964	0.24611	0.26469	0.24819	1.03248	1.34441	1.25831	1.10725
ENSMUSG00000001930	0.49492	-0.05427	-0.10131	-0.05788	0.676259	0.808153	0.83693	0.436451
ENSMUSG00000001942	0.00319	-0.00581	-0.20464	0.02031	0.810169	0.660339	1.13492	1.24814
ENSMUSG00000001943	-0.26681	0.22925	0.28898	0.16767	1.82353	0.705882	0.705882	0.352941
ENSMUSG00000001946	0.21702	-0.71788	-0.05363	0.04251	0.416206	1.00737	0.729282	0.414365
ENSMUSG00000001948	0.31646	0.12841	0.28603	-0.23343	1.43143	1.54857	1.32286	0.911429
ENSMUSG00000001962	0.02883	0.2126	0.19766	0.19312	1.13359	1.15419	1.23741	1.0629
ENSMUSG00000001964	0.13017	0.37771	0.35332	0.28795	1.14211	1.55263	1.42807	1.72105
ENSMUSG00000001983	0.10255	-0.00362	0.26904	0.30252	2.09091	2.01136	2.73864	2.32955
ENSMUSG00000001985	-0.18103	0.43409	-0.73091	-0.73313	0.718157	0.745257	0.552846	1.39837
ENSMUSG00000001986	0.03272	0.20176	0.46925	0.70544	2.47289	4.01506	2.05422	3.48795
ENSMUSG00000001988	0.714286	0.142857	0.285714	0.285714	0.571429	0.857143	1.57143	0.714286
ENSMUSG00000001995	0.01306	-0.18963	-0.04404	0.20432	1.11929	1.82234	1.24873	0.893401
ENSMUSG00000001998	-0.32055	-0.45593	-0.17052	-0.17661	1.25826	2.4876	1.88223	1.79752
ENSMUSG00000001999	0.00058	0.02643	-0.04718	-0.17766	1.23837	0.793128	1.1582	0.979957
ENSMUSG00000002006	0.16624	-0.22981	-0.37482	-0.07699	1.01471	0.867647	0.882353	0.852941
ENSMUSG00000002007	-0.02134	-0.57797	-0.47492	-0.17738	0.647059	3.05882	0.294118	0.764706
ENSMUSG00000002010	0.09779	0.22249	0.1206	0.14887	1.14538	1.2661	1.29055	0.998909
ENSMUSG00000002012	0.36378	-0.09989	0.13873	0.30351	1.5	1.99655	1.16207	1.4
ENSMUSG00000002014	0.27139	-0.10127	0.06774	-0.10635	0.986878	1.02319	0.891364	1.03631
ENSMUSG00000002015	-0.11436	-0.27495	-0.15165	-0.36126	1.06891	1.27274	1.18599	1.03916
ENSMUSG00000002017	-0.10261	-0.13356	0.18391	0.09134	0.830592	0.88898	0.844572	0.722039
ENSMUSG00000002020	-0.03199	0.46922	-0.19944	-0.35132	0.606061	1.30303	0.81352	0.634033
ENSMUSG00000002028	-0.39944	-0.6513	-0.5294	-0.66689	1.15947	1.6546	1.63928	1.48886
ENSMUSG00000002031	0.08049	0.48445	0.41198	0.3143	1.05867	1.09349	1.45458	1.35428
ENSMUSG00000002032	-0.78852	-0.12748	0.20887	-0.23285	0.82069	0.386207	0.806897	0.462069
ENSMUSG00000002033	-0.35138	-0.17797	-0.96318	-0.4429	1.19048	0.0714286	2.11905	0.047619
ENSMUSG00000002043	0.03473	0.25016	-0.00178	-0.07015	0.829508	1.06885	1.20984	1.08197
ENSMUSG00000002052	-0.01338	-0.04947	0.20199	-0.10938	1.08394	1.15693	0.841849	1.00061
ENSMUSG00000002055	-0.10354	-0.40697	0.61149	0.73804	0.486226	0.725895	0.584022	0.891185
ENSMUSG00000002057	0.266667	0.666667	0.466667	0.2	0.545455	0.590909	0.5	0.681818
ENSMUSG00000002058	0.27107	0.25905	0.1549	0.5436	1.13663	0.674419	1.38953	1.2064
ENSMUSG00000002059	0.45103	0.35623	0.19355	0.30745	0.909283	0.92616	1.14979	1.39873
ENSMUSG00000002064	-0.02971	-0.14134	-0.15663	-0.26493	0.696459	0.920553	0.941278	1.03368
ENSMUSG00000002068	0.43694	0.17044	-0.29089	-0.01812	0.367647	0.455882	0.602941	1.14706
ENSMUSG00000002076	-0.24336	0.43349	0.23985	-0.06441	0.959918	0.789311	1.037	0.437821
ENSMUSG00000002083	-0.32952	0.6267	0.28317	0.27684	2.85714	1.57143	2.28571	4.35714
ENSMUSG00000002100	-0.50673	-0.43243	0.09311	-0.34129	0.810056	0.497207	0.513966	0.843575
ENSMUSG00000002102	0.29505	0.31925	0.38833	0.17903	0.859495	0.978297	0.894294	0.861553
ENSMUSG00000002103	0.44544	0.42005	0.50535	0.66173	1.08539	1.33483	1.28539	1.63427
ENSMUSG00000002104	-0.37057	-0.52715	-0.5316	-0.57706	1.43636	1.46364	1.27273	0.427273
ENSMUSG00000002105	0.81691	0.76332	0.75445	1.3458	0.961644	0.506849	1.1726	0.520548
ENSMUSG00000002107	0.23724	0.29375	-0.05577	0.42185	1.23224	1.6445	1.86734	1.07103
ENSMUSG00000002108	0.79597	3	1.34573	0.35781	1.45455	0.272727	1.27273	0.545455
ENSMUSG00000002109	-0.04031	0.13749	0.15069	-0.2101	1.24753	0.466368	0.983857	0.86009
ENSMUSG00000002111	0.3	1.8	0.5	0.8	0.433962	0.0754717	0.132075	0.301887
ENSMUSG00000002129	0.05101	0.38858	0.25863	0.23274	1.06602	1.10138	1.26608	0.971708
ENSMUSG00000002147	0.2846	0.17026	0.49846	-0.11053	0.997876	1.31439	0.859267	0.565056
ENSMUSG00000002190	1.09091	0.636364	1	0.545455	1.23529	4.41176	0.764706	0.882353
ENSMUSG00000002204	1.39891	0.29613	0.47215	0.3322	7	1	1.8	2.6
ENSMUSG00000002205	-0.10227	0.44534	0.45887	0.08127	0.678552	1.01026	0.754727	0.837925
ENSMUSG00000002210	0.28954	0.68051	0.01921	0.64255	1.1	0.936667	1.19333	0.983333
ENSMUSG00000002221	-0.03017	-0.02561	0.06251	-0.41238	0.957516	1.25	1.4183	1.19444
ENSMUSG00000002222	-0.03295	-0.11934	0.32142	0.05948	1.17	1.383	1.34	1.79
ENSMUSG00000002227	-0.01262	-0.10127	0.24336	-0.03115	0.735537	1.21419	1.35399	1.02617
ENSMUSG00000002228	0.285714	0.142857	0.285714	0.357143	9	8.5	2.5	1.5
ENSMUSG00000002233	0.2147	0.3347	-0.12353	-0.12397	0.678955	1.10138	0.855607	1.29186
ENSMUSG00000002240	0.666667	0.666667	1.16667	0.666667	0.5	0.875	0	0.5
ENSMUSG00000002249	0.17234	0.24009	0.30659	-0.0685	0.753623	0.702899	0.688406	0.615942
ENSMUSG00000002250	0.24154	-0.28091	0.2388	-0.39733	0.561538	0.623077	0.561538	1.12308
ENSMUSG00000002257	-0.29242	-0.19546	0.48482	-0.27622	0.309091	0.763636	0.6	1.16364
ENSMUSG00000002265	0.23428	0.08544	-0.16551	0.35988	1.35108	1.6532	1.29932	0.988513
ENSMUSG00000002266	0.55718	-0.10031	0.3143	0.57904	1.40896	0.874277	0.812139	0.270231
ENSMUSG00000002274	-0.31439	-0.44429	-0.4393	-0.14636	0.538462	0.884615	0.461538	1
ENSMUSG00000002279	0.11023	0.26147	0.14137	-0.1916	1.40709	1.40541	1.88514	1.02196
ENSMUSG00000002280	1.14795	1.35956	1.22825	1.23018	0.572939	1.10571	0.894292	0.641649
ENSMUSG00000002289	0.11467	0.15158	0.45444	0.11431	1.0412	0.752822	1.39221	1.33691
ENSMUSG00000002297	-0.32368	-0.40903	-0.39728	-0.50003	1.13241	1.31904	0.996217	1.92055
ENSMUSG00000002307	0.21784	0.77058	0.51481	0.50574	0.610714	1.60536	1.50893	1.125
ENSMUSG00000002308	0.02424	-0.30929	0.08764	-0.33391	0.806616	0.783715	0.565734	0.957591
ENSMUSG00000002319	0.45497	0.49481	0.52069	0.78814	1.08904	1.01743	1.00872	0.794521
ENSMUSG00000002320	0.25044	0.4741	0.29965	0.45734	0.70382	0.737007	0.988729	0.655604
ENSMUSG00000002324	0.20181	-0.27733	-0.3941	-0.49597	4.85714	3.14286	4.42857	2.42857
ENSMUSG00000002325	-0.06181	0.33469	-0.08422	1.24382	0.794118	0.470588	0.792941	1.44235
ENSMUSG00000002326	0.36878	0.4085	0.44444	0.47717	0.598131	1.01636	0.778037	0.817757
ENSMUSG00000002329	-0.15489	0.13021	0.47736	0.13998	0.7368	0.972	0.9344	1.148
ENSMUSG00000002332	-0.19286	-0.24777	-0.3973	0.03624	0.833703	0.894678	0.839246	0.863636
ENSMUSG00000002341	-0.31433	-0.24732	-0.20423	-0.50695	1.38462	1.34615	1.42308	1.38462
ENSMUSG00000002342	0.51223	-0.18248	0.54139	0.30777	0.2469	1.07441	0.262683	0.656144
ENSMUSG00000002343	0.47581	0.71637	0.82341	0.33163	2.27826	2.63478	1.76522	1.49565
ENSMUSG00000002345	0.02242	0.02504	0.21536	-0.21267	0.953795	0.929043	0.985149	1.20627
ENSMUSG00000002346	0.17621	-0.19005	0.73217	0.51409	1.14583	1.30972	0.954167	1.58472
ENSMUSG00000002365	0.01665	-0.16827	-0.00286	0.05954	0.858881	0.93674	0.922141	0.96837
ENSMUSG00000002372	0.13482	0.63304	0.43066	0.41797	0.891496	1.18964	1.2825	1.36266
ENSMUSG00000002379	0.16826	-0.01364	0.14999	-0.06518	1.04221	1.34886	1.19117	1.19554
ENSMUSG00000002384	0.529412	0.176471	0.705882	0.117647	0.645161	0.774194	0.193548	0.290323
ENSMUSG00000002393	0.98965	1.12926	0.98975	0.62399	0.834437	0.483444	0.774834	0.529801
ENSMUSG00000002395	0.11788	-0.13501	-0.13703	-0.12146	0.942073	0.792683	0.873857	0.971037
ENSMUSG00000002396	0.6504	0.82896	0.74141	0.83758	1.78889	0.944444	2.75556	0.3
ENSMUSG00000002409	0.58071	0.29827	-0.19	0.40364	0.632353	0.911765	0.441176	0.588235
ENSMUSG00000002413	0.13668	0.13727	-0.03906	0.03677	1.01637	1.37243	1.22772	1.17936
ENSMUSG00000002416	-0.02407	-0.39505	-0.40102	-0.63609	1.1443	1.17701	0.96057	1.21477
ENSMUSG00000002428	-0.83727	-0.72959	-0.60332	-0.61984	1.06526	0.858434	0.987952	1.10542
ENSMUSG00000002455	-0.03702	-0.12217	0.0178	-0.03044	0.878372	0.959288	1.02392	1.19593
ENSMUSG00000002458	0.69476	0.43035	0.89417	0.80815	0.827784	0.859931	0.918485	0.950631
ENSMUSG00000002459	0.17992	0.533333	-0.15262	-0.10409	1.47826	1.04348	0.913043	1.3913
ENSMUSG00000002475	-0.32876	-0.21302	-0.0232	-0.25449	0.961637	0.882353	0.677749	0.757033
ENSMUSG00000002477	0.01653	-0.16476	-0.01685	-0.27443	0.965857	1.243	1.32329	1.48416
ENSMUSG00000002486	-0.29654	0.47108	0.55264	0.46881	0.433649	0.625592	1.50948	1.20379
ENSMUSG00000002489	0.01062	0.4402	0.81479	0.88371	0.854077	1.66309	1.03863	0.901288
ENSMUSG00000002496	-0.32731	-0.34283	-0.19263	-0.39562	1.03303	1.09398	1.10719	1.79162
ENSMUSG00000002500	0.285714	2.71429	1.28571	0.285714	1.85714	2.85714	2.85714	0
ENSMUSG00000002504	0.38985	0.16884	0.44657	-0.06801	0.98998	0.857715	0.907816	0.951904
ENSMUSG00000002524	0.22119	0.55491	0.28046	0.26449	1.01549	1.08742	1.27297	1.18972
ENSMUSG00000002546	-0.11267	-0.05196	0.0128	0.26137	0.646712	0.689892	0.800785	0.966634
ENSMUSG00000002550	-0.03322	0.29247	-0.03326	0.36022	0.763889	0.611883	0.925154	0.922068
ENSMUSG00000002565	0.00045	-0.79915	-0.50904	-0.94618	0.453125	2.125	0.546875	0.59375
ENSMUSG00000002578	0.68226	-0.19094	0.3099	-0.28891	1.42143	0.564286	0.585714	0.95
ENSMUSG00000002580	0.09914	-0.06805	-0.05435	-0.56451	1.01159	1.10665	1.06646	1.017
ENSMUSG00000002588	0.8	1.8	1	5.4	1.75	0.666667	0.916667	0.666667
ENSMUSG00000002602	0.03118	0.42417	0.34329	0.07854	1.04317	1.67451	1.38987	1.20941
ENSMUSG00000002603	0.88769	0.93554	-0.15635	0.29348	1.06338	0.140845	0.253521	0.0704225
ENSMUSG00000002608	0.66003	0.51151	0.47953	0.14655	0.77394	0.527473	1.08163	0.872841
ENSMUSG00000002617	-0.30545	-0.45012	-0.73774	-0.47858	1.00247	0.983526	0.789127	0.98682
ENSMUSG00000002625	0.23356	0.59947	0.20634	0.16681	1.0305	1.54257	1.26048	1.38501
ENSMUSG00000002633	1	0.4	0.8	0.2	4	1.25	1.75	1.5
ENSMUSG00000002635	0.78107	0.43803	0.64586	0.37096	0.920863	1.06875	1.20624	0.758593
ENSMUSG00000002658	0.35843	0.2498	0.40918	0.20564	1.22198	1.42974	1.15309	0.936577
ENSMUSG00000002660	0.04946	-0.07268	0.07869	0.04147	0.923206	1.03139	0.976457	1.02915
ENSMUSG00000002661	-0.22187	-0.15409	-0.19792	-0.35936	1.02266	1.22805	1.42635	1.18414
ENSMUSG00000002664	1	2	1	2	0.7	0	0.1	0.6
ENSMUSG00000002668	-0.35357	-1.16203	-0.39114	-1.11918	2.42857	0.571429	0.571429	3.71429
ENSMUSG00000002679	0.07535	-0.00505	0.11968	-0.04671	1.21204	1.0992	1.13493	1.12929
ENSMUSG00000002688	0.14716	-0.13103	-0.19775	-0.55227	1.24862	1.6989	1.56077	0.823204
ENSMUSG00000002699	-1.1194	-0.60888	-0.15886	-0.9379	2.09589	2.68493	5.16438	0.109589
ENSMUSG00000002718	-0.23188	0.11209	0.09981	0.01847	1.13031	1.26792	1.20849	1.28075
ENSMUSG00000002728	-0.01956	-0.03226	0.09432	0.03001	1.05368	1.29931	1.17324	1.13949
ENSMUSG00000002731	-0.12172	-0.11902	-0.00035	0.02791	0.745735	0.890333	1.28757	1.07067
ENSMUSG00000002732	0.15795	-0.37176	-0.06504	-0.43073	0.921283	0.847425	1.17784	0.991254
ENSMUSG00000002733	-0.2341	-0.51253	-0.23895	-0.44325	1.03011	2.68172	1.37204	2.55269
ENSMUSG00000002741	0.18533	-0.06858	0.36716	0.28065	0.586137	0.666667	0.861366	0.907238
ENSMUSG00000002748	-0.16613	-0.31672	-0.21141	-0.43048	0.800525	1.1727	1.14016	1.37533
ENSMUSG00000002763	0.01862	0.50482	0.0934	-0.14729	0.694915	0.749153	0.430508	0.342373
ENSMUSG00000002767	0.4949	0.63535	0.66575	0.63641	0.996206	1.12195	1.09051	1.08618
ENSMUSG00000002768	0.07466	0.04893	0.16759	-0.17876	0.981089	1.06082	1.00767	0.906977
ENSMUSG00000002769	-0.06302	-0.48868	0.32494	-0.64302	1.26667	1.09333	0.706667	0.666667
ENSMUSG00000002771	-0.47226	-0.30553	-0.07812	0.07819	1	0.85	0.7	2
ENSMUSG00000002778	0.30629	-0.16921	-0.04807	-0.41129	1.22802	1.20604	1.17033	1.6772
ENSMUSG00000002781	0.24418	0.31607	-0.28794	-0.06995	0.665939	0.572052	0.655022	0.0938865
ENSMUSG00000002791	-0.20446	2.25	5.5	0.79617	0.923077	0.307692	1.69231	0.538462
ENSMUSG00000002797	0.11273	-0.07824	-0.09343	-0.48048	0.916725	0.887334	1.03359	0.872288
ENSMUSG00000002799	0.26502	0.80329	1.04312	1.63315	1.17629	2.95441	2.04255	1.00912
ENSMUSG00000002803	0.21414	0.12822	0.55982	0.22289	0.700599	1.56886	0.916168	1.08982
ENSMUSG00000002804	0.06653	0.2907	0.26465	0.39115	0.843888	1.17378	1.28719	1.03829
ENSMUSG00000002808	-0.33874	0.05784	-0.54325	-0.51351	1	1.55462	0.731092	1.09244
ENSMUSG00000002812	0.21233	0.41093	0.37385	0.0561	1.11319	0.941728	1.06095	1.08104
ENSMUSG00000002814	0.05211	0.27711	0.38379	-0.17698	1.61871	1.61631	1.16307	1.41007
ENSMUSG00000002820	-0.43732	-0.05815	0.10554	-0.11235	0.55132	0.920821	0.780059	0.753666
ENSMUSG00000002825	0.1078	0.31478	0.81703	0.35861	1.30081	1.05081	1.20325	0.906504
ENSMUSG00000002831	-0.2025	0.5	0.6875	-0.0742	1.4	1.53333	0.6	1.26667
ENSMUSG00000002833	0.23379	0.57186	0.44415	0.05402	0.73027	0.956044	0.838162	0.746254
ENSMUSG00000002835	-0.57643	-0.27624	-0.38471	-0.81175	0.618143	0.685654	0.837553	0.618143
ENSMUSG00000002844	-0.03377	0.02636	-0.32247	-0.15246	0.885439	1.01427	0.925724	0.75535
ENSMUSG00000002845	0.23058	0.25555	0.2395	0.31208	0.657509	0.874542	0.894689	0.881868
ENSMUSG00000002846	0.17265	0.6241	0.41491	0.4046	1.30126	0.979079	0.813808	0.960251
ENSMUSG00000002847	0.32978	0.15212	0.28879	-0.01732	0.98577	0.968952	1.27426	1.15136
ENSMUSG00000002870	0.50922	1.1563	0.5449	0.49689	0.995122	0.896098	0.814146	0.685366
ENSMUSG00000002871	0.46588	0.37747	0.42333	0.56278	0.989005	1.01814	0.759208	0.670698
ENSMUSG00000002881	0.66039	0.09824	0.66138	0.50153	0.840625	1.20938	1.20417	1.05729
ENSMUSG00000002885	0.1961	-0.1739	0.50562	0.54407	0.92467	0.694915	0.59887	0.981168
ENSMUSG00000002897	0.03326	-0.68608	-0.3243	0.63324	0.497436	0.635897	0.984615	1.22051
ENSMUSG00000002900	0.28652	0.14787	0.00959	0.24924	0.921797	1.32169	1.15862	1.00194
ENSMUSG00000002908	0.65696	-0.13183	0.24496	0.40738	1.56	4.4	4.8	1.36
ENSMUSG00000002910	0.07877	0.7432	0.73046	0.58613	2.38554	5.06024	2.13253	2.68675
ENSMUSG00000002930	0.666667	0	1.33333	1.33333	0.727273	0.363636	0.454545	0.454545
ENSMUSG00000002944	-0.26694	-0.22073	0.01834	-0.60189	0.959566	0.661736	1.01134	0.518245
ENSMUSG00000002948	0.36791	0.18609	0.27898	-0.10855	1.21962	1.27818	1.40264	1.55051
ENSMUSG00000002949	0.10353	0.29802	0.30914	0.35228	1.20071	1.32811	1.04954	1.12538
ENSMUSG00000002957	0.15892	0.48375	-0.01849	-0.02573	0.934441	0.946678	1.08217	1.23164
ENSMUSG00000002963	0.56613	0.78203	0.86036	0.91258	1.50394	1.75591	1.14436	1.22047
ENSMUSG00000002968	0.44997	0.60419	0.45398	0.31924	1.41667	1.26167	1.09833	1.35167
ENSMUSG00000002980	0.16602	0.19836	0.1873	0.11078	0.667665	0.637725	0.266467	0.443114
ENSMUSG00000002981	0.29022	0.24921	-0.01562	0.03051	0.787833	1.0251	1.02662	0.938403
ENSMUSG00000002983	-0.62658	-0.36395	-1.01315	-0.73198	1.29545	0.840909	0.431818	0.965909
ENSMUSG00000002984	-0.46982	-0.20742	-0.35752	0.26193	0.718919	0.940541	0.410811	1.03784
ENSMUSG00000002985	0.78616	0.38878	0.86554	0.52639	1.0219	1.15224	1.31074	0.748697
ENSMUSG00000002992	0.72692	0.51055	0.57518	-0.00745	1.32639	1.78472	1.91667	0.0833333
ENSMUSG00000002996	-0.01946	0.28622	0.12184	0.07348	1.03847	1.30689	1.26177	0.894792
ENSMUSG00000002997	-0.6344	-0.66869	-0.63	-1.04585	0.70297	0.688334	1.22256	1.7585
ENSMUSG00000003031	0.1728	0.0009	-0.2626	0.01237	1.7308	1.61522	1.81981	1.60625
ENSMUSG00000003032	-0.03397	-0.78787	-0.50312	-0.65757	0.991416	0.583691	0.725322	1.78541
ENSMUSG00000003033	0.36096	0.38148	0.48591	0.46982	0.924428	1.22958	1.01266	1.04575
ENSMUSG00000003037	0.07952	0.15258	0.43726	0.34265	0.779026	0.982635	0.754171	0.947566
ENSMUSG00000003038	0.06155	-0.22174	-0.15122	-0.24999	0.976375	1.1438	1.16577	1.2017
ENSMUSG00000003039	0.16194	0.18341	0.21274	0.18715	1.36206	1.3733	1.41827	1.18829
ENSMUSG00000003051	-0.02673	0.89137	1.16805	0.58819	0.865482	0.972081	1.16244	0.885787
ENSMUSG00000003053	0.32943	0.31345	0.39968	0.39777	0.565217	1.30435	1.26087	0.195652
ENSMUSG00000003062	0.21447	0.18527	0.14013	0.12451	0.910095	0.880521	0.876972	0.876183
ENSMUSG00000003068	0.33872	0.49057	0.2395	-0.01918	1.04322	0.760314	1.0334	0.986248
ENSMUSG00000003070	0.60028	0.59092	0.15529	0.11031	0.443709	0.529801	0.748344	1.46358
ENSMUSG00000003072	0.43375	0.48902	0.24784	0.24207	1.01255	0.972571	0.799163	0.853556
ENSMUSG00000003099	0.61098	1.12484	0.81595	1.14489	1.36032	1.21587	1.17619	0.871429
ENSMUSG00000003119	-0.18386	-0.47662	-0.47155	-0.29224	1.18317	0.94637	0.771452	1.08911
ENSMUSG00000003123	0.43309	0.55514	1.02354	0.2063	0.781991	1.07583	1.16588	0.862559
ENSMUSG00000003131	-0.01971	0.18852	0.07284	0.42625	1.18383	1.29562	1.28308	1.44637
ENSMUSG00000003134	-0.55484	-0.27923	-0.05411	0.01331	1.12264	0.987421	1.60377	2.09748
ENSMUSG00000003135	-0.48986	-0.70717	-0.64131	-0.7158	1.15613	1.04833	1.3829	1.12268
ENSMUSG00000003153	-0.03354	0.06743	0.81294	-0.16383	1.66154	1.20769	1.26154	0.976923
ENSMUSG00000003154	-0.20459	0.1904	-0.01212	-0.13379	0.962064	1.09105	1.20486	1.15933
ENSMUSG00000003161	0.03919	-0.13999	-0.17733	-0.09077	1.16332	1.19344	1.01197	1.39653
ENSMUSG00000003166	-0.03129	0.12516	0.16922	0.06952	0.67364	0.901674	1.07183	1.25662
ENSMUSG00000003184	0.35631	0.13305	0.07621	-0.07397	1.58414	1.14401	1.45793	1.1521
ENSMUSG00000003190	0.35229	0.03881	0.30557	0.15335	1.1314	0.942094	0.951002	1.26503
ENSMUSG00000003198	-0.10112	0.1134	0.12677	-0.38859	1.32013	1.72607	1.43564	1.53135
ENSMUSG00000003199	0.17191	0.15189	-0.18469	0.13429	0.603015	0.79397	0.806533	0.939698
ENSMUSG00000003200	0.15917	0.17037	0.32967	-0.09908	1.0612	1.19746	0.869515	0.887991
ENSMUSG00000003206	-0.48936	0.7	-0.43886	-0.18544	5.4	1.4	0.6	1
ENSMUSG00000003208	0.3814	0.6061	0.3019	0.50345	0.490741	1.30556	0.921296	0.861111
ENSMUSG00000003226	-0.18501	-0.06593	-0.28749	0.08024	1.05475	1.27875	1.14286	1.77949
ENSMUSG00000003227	0.03546	1.09159	0.16408	0.11781	0.615385	0.948718	0.410256	0.769231
ENSMUSG00000003228	0.09301	-0.03637	-0.30776	-0.72687	0.827068	2.64662	2.62406	2.70677
ENSMUSG00000003233	-0.08449	0.01399	0.24698	0.24208	0.711934	1.03704	1.15226	1.21399
ENSMUSG00000003234	-0.15077	0.29322	0.1604	0.18296	0.97738	1.00447	1.27815	0.870992
ENSMUSG00000003235	0.11498	0.25126	0.22668	-0.27974	0.831089	0.919217	0.724602	1.24847
ENSMUSG00000003269	0.0161	0.50508	-0.00562	0.27935	0.980645	1.0629	1.00968	1.2629
ENSMUSG00000003271	0.28353	-0.43261	-0.36438	-0.56797	0.454545	0.409091	0.477273	1.02273
ENSMUSG00000003273	0.3186	0.29776	-0.20053	0.11926	1.24444	0.311111	0.955556	0.111111
ENSMUSG00000003279	0.20753	0.70881	0.19419	0.26255	0.918719	1.02094	1.23522	0.923645
ENSMUSG00000003282	0.3313	-0.14351	0.14071	0.29429	0.946207	0.954483	1.14621	1.05655
ENSMUSG00000003283	-0.13839	0.1009	-0.14591	0.50934	0.929825	1.82456	1.05263	1.66667
ENSMUSG00000003299	0.13797	0.5361	0.46557	0.28149	1.17934	1.02409	1.12259	0.640257
ENSMUSG00000003308	0.21465	0.82138	0.52548	0.54855	1.1368	1.16649	0.979852	1.22375
ENSMUSG00000003309	0.27526	0.67604	0.27732	0.32483	1.09106	0.697293	1.10008	0.843314
ENSMUSG00000003316	-0.12911	-0.05087	-0.31405	-0.18532	1.16594	1.36027	1.37791	1.19918
ENSMUSG00000003341	0.14916	0.36897	-0.23481	0.15523	1.04545	0.227273	1.68182	2.31818
ENSMUSG00000003344	0.45176	0.16374	0.60264	0.16881	0.761905	0.765306	1.20068	0.921769
ENSMUSG00000003345	0.03598	-0.07052	0.20548	0.55676	1.02101	1.02521	1.80252	1.10924
ENSMUSG00000003346	0.43276	0.37902	0.37562	0.25757	0.6275	0.6775	1.0925	0.865
ENSMUSG00000003348	0.16845	0.76556	1.09918	1.14776	0.655296	1.16338	1.97666	1.00539
ENSMUSG00000003352	0.54069	1.02835	0.40846	0.60154	0.848837	1.04264	0.790698	0.976744
ENSMUSG00000003354	1.00646	1.22362	1.06333	1.01001	1.01124	1.32584	0.460674	0.966292
ENSMUSG00000003355	-0.30265	-0.79135	-0.3687	-1.08513	0.8125	1.55729	1.42188	1.53646
ENSMUSG00000003360	0.62338	-0.01611	0.1037	0.46692	1.45853	1.47696	1.2788	1.78802
ENSMUSG00000003363	0.39627	0.88704	0.47524	0.56567	1.09455	1.21083	1.12362	1.2008
ENSMUSG00000003378	-0.44687	-0.14675	0.11848	1.01604	0.582278	1.55696	1.46835	1.29114
ENSMUSG00000003379	-0.04744	0.37842	0.34567	-0.39703	0.25	0.5	0.357143	0.392857
ENSMUSG00000003380	0.7859	0.62681	0.37038	0.2621	0.880196	0.956479	1.10807	0.718337
ENSMUSG00000003382	0.03384	-0.31369	0.10591	-0.13875	0.821429	0.916071	1.30357	1.25536
ENSMUSG00000003402	-0.17609	0.43163	-0.05424	0.02805	1.00631	0.923239	1.08517	0.845426
ENSMUSG00000003410	-0.61719	-0.20246	-0.57615	-0.07832	0.824818	0.379562	1.13869	0.540146
ENSMUSG00000003411	-0.51139	-0.0729	0.05721	0.34148	0.681818	0.810606	0.734848	0.886364
ENSMUSG00000003418	-0.54233	-0.91358	-0.40827	0.16792	0.950617	0.851852	0.765432	0.814815
ENSMUSG00000003420	0.51761	0.29795	0.21813	0.32517	1.18926	1.19428	1.28363	0.854418
ENSMUSG00000003421	0.37976	0.55858	0.48735	0.49658	1.02491	1.38979	1.15878	0.967621
ENSMUSG00000003423	0.30557	0.52153	0.09057	0.20625	1.17535	1.28993	1.51042	1.44618
ENSMUSG00000003429	-0.01888	-0.10888	0.12899	-0.04505	1.04729	1.20642	1.08258	1.42083
ENSMUSG00000003435	0.29697	0.91909	0.5219	0.75383	0.566305	1.20434	0.82399	0.732972
ENSMUSG00000003436	0.05915	0.12734	-0.51104	0.09049	1.10204	1.08163	0.836735	0.94898
ENSMUSG00000003437	0.1281	0.2298	0.47378	0.31942	1.02495	1.11666	0.741734	1.04429
ENSMUSG00000003438	0.68335	0.67151	0.48201	0.64402	1.21422	1.05221	0.990999	1.0009
ENSMUSG00000003444	0.14899	-0.07469	-0.00491	-0.08586	0.904671	0.878932	1.00095	0.833174
ENSMUSG00000003452	-0.1458	0.42773	0.16497	0.41701	1.44915	2.15156	2.01543	1.8892
ENSMUSG00000003458	0.03612	0.09029	0.2789	0.41135	1.05987	1.15538	1.46436	1.54943
ENSMUSG00000003464	0.3311	0.34009	0.45996	0.43511	1.04343	1.11218	1.11942	1.34258
ENSMUSG00000003469	0.08869	0.0307	-0.23444	0.28303	2.875	0.125	0.208333	0.25
ENSMUSG00000003476	-0.2265	-0.61685	-0.02457	-0.36175	0.827586	0.586207	0.413793	0.758621
ENSMUSG00000003477	0.5	0.666667	0.833333	0.5	0.857143	0.5	0.357143	0.357143
ENSMUSG00000003484	0.15434	0.38972	0.02176	0.61676	2.36842	0.157895	0.105263	0.263158
ENSMUSG00000003500	0.0708	0.21975	0.19448	0.31257	0.801527	0.576336	0.958015	0.770992
ENSMUSG00000003505	0.555556	1.66667	0.333333	1	1.27273	1.18182	2.09091	1
ENSMUSG00000003518	0.42423	0.29255	0.64169	0.75112	1.29564	1.88556	0.874659	1.12534
ENSMUSG00000003526	0.16738	0.24079	-0.1456	0.29115	1.08918	0.703216	1.15205	0.881579
ENSMUSG00000003527	0.60143	0.84144	0.78809	0.49897	0.96468	1.51325	1.37638	1.39845
ENSMUSG00000003528	-0.17617	0.32124	-0.24371	-0.11301	0.68815	0.881497	1.04782	0.700624
ENSMUSG00000003531	0.36209	0.2917	0.34711	-0.01391	0.734314	0.855882	0.965686	1.01275
ENSMUSG00000003534	0.72432	1.13377	1.09705	0.81275	0.736976	1.01652	0.813215	0.956798
ENSMUSG00000003541	0.16313	-0.38954	0.20089	0.03704	0.635484	0.690323	1.07419	0.764516
ENSMUSG00000003545	-0.01421	-0.17858	-0.32062	-0.82432	1.37288	0.898305	1.74576	1.25424
ENSMUSG00000003546	0.16063	0.49399	0.39465	-0.29678	1.25338	1.41554	0.956081	0.986486
ENSMUSG00000003549	0.01024	0.29628	0.22654	0.09252	0.540508	0.814994	0.854897	0.853688
ENSMUSG00000003555	-0.59624	-0.6829	-0.17847	-1.29593	0.253488	0.044186	0.148837	0.418605
ENSMUSG00000003559	0.17609	0.25847	0.05587	-0.18096	0.962047	0.994825	0.944221	0.910868
ENSMUSG00000003573	0.23211	0.54412	0.41764	0.28679	1.19892	1.05376	1.22043	2.30645
ENSMUSG00000003575	0.89947	1.29181	1.32334	1.3666	1.2214	1.27192	1.34473	0.998514
ENSMUSG00000003581	0.07569	0.23463	-0.00443	-0.01285	0.94359	0.820513	0.692308	1.04103
ENSMUSG00000003585	0.625	2.25	1	0.875	1.11111	0.888889	0.666667	0.388889
ENSMUSG00000003604	-0.19777	0.05743	-0.29525	-0.29557	0.80137	1.30137	1.63307	1.0362
ENSMUSG00000003617	-0.16453	-0.67052	-0.35663	-0.4604	0.532086	0.631016	1.18449	0.657754
ENSMUSG00000003623	-0.27411	-0.02065	-0.07427	-0.1622	0.937268	1.58564	1.54106	1.37061
ENSMUSG00000003644	-0.10935	0.0265	0.72611	0.69455	0.469811	0.581132	0.577358	0.767925
ENSMUSG00000003657	0.6	2.6	3	0.4	4.6	0	5.2	4
ENSMUSG00000003660	0.26003	0.36056	0.17838	0.22601	1.38339	1.36487	1.57118	0.905382
ENSMUSG00000003662	0.00289	0.54687	0.47501	0.39684	0.743867	0.686948	0.928361	0.606477
ENSMUSG00000003665	0.22973	0.07896	0.28054	0.1676	0.722222	1.11111	3.33333	1.38889
ENSMUSG00000003680	0.07935	0.26035	-0.07016	-0.26793	1.06158	0.8633	1.0936	1.24877
ENSMUSG00000003721	-0.05175	-0.00925	0.35832	0.00554	1.14968	1.05308	0.766454	0.819533
ENSMUSG00000003731	-0.2833	-0.19381	-0.31851	-0.09393	1.07674	1.06835	1.20384	0.914868
ENSMUSG00000003746	0.27048	-0.03781	-0.24236	-0.09248	0.896353	1.40883	0.902111	0.921305
ENSMUSG00000003752	0.20891	-0.0165	0.20001	0.22478	0.518293	0.737805	0.634146	0.292683
ENSMUSG00000003762	0.54326	0.25169	0.1757	0.40321	0.880682	0.857955	0.386364	0.923295
ENSMUSG00000003778	-0.19728	-0.29102	-0.01028	0.24987	0.829379	1.20021	0.990403	1.43802
ENSMUSG00000003779	0.05756	0.00463	0.16929	0.0637	0.920052	1.03277	1.13761	1.11664
ENSMUSG00000003808	-0.25499	-0.02126	0.00038	-0.03098	0.827728	0.890074	1.39951	1.37654
ENSMUSG00000003809	-0.2782	0.49778	0.07627	0.19702	1.12603	0.816116	0.944215	1.30579
ENSMUSG00000003810	0.4259	0.64062	0.57726	0.64764	1.08257	1.33129	1.23853	0.544343
ENSMUSG00000003812	-1.47645	-0.13766	-0.61995	-0.28576	1.19412	0.941176	0.558824	0.788235
ENSMUSG00000003813	0.1627	0.0678	0.26376	0.28975	0.994723	1.3153	1.07784	0.687335
ENSMUSG00000003814	-0.14374	-0.23472	-0.46091	-0.37554	0.918595	0.924232	0.81248	0.854362
ENSMUSG00000003824	0.21981	-0.10307	-0.31932	-0.25676	1.13509	1.032	1.21331	1.10615
ENSMUSG00000003847	0.01133	-0.1837	-0.3618	-0.25174	0.940947	1.48245	1.81114	1.16435
ENSMUSG00000003848	0.11175	0.2648	0.36712	0.69902	0.726037	0.746781	0.841202	1.20386
ENSMUSG00000003849	0.09527	0.28078	-0.00814	0.40096	0.857585	1.28173	1.49226	1.64396
ENSMUSG00000003863	0.15478	-0.2939	0.33266	-0.66167	2.12903	2.35484	1.03226	2.67742
ENSMUSG00000003865	0.05507	0.02474	-0.03645	0.57582	0.753369	0.90027	0.75876	0.846361
ENSMUSG00000003868	0.39146	0.42725	0.51201	0.54268	1.14729	1.03931	0.776301	1.09081
ENSMUSG00000003872	-0.31887	0.43216	0.04772	0.18309	0.895833	1	0.770833	0.854167
ENSMUSG00000003873	0.4051	0.98617	1.21834	1.36711	0.966534	1.21753	1.18486	1.37131
ENSMUSG00000003882	-1.16124	-1.14499	-0.97979	-1.18406	1.12903	0.451613	0.548387	0.0967742
ENSMUSG00000003923	0.15642	-0.04573	0.03749	-0.09608	0.962571	1.09154	1.22661	1.09561
ENSMUSG00000003929	-0.02408	-0.40306	0.02024	-0.33882	0.933962	1.57652	1.46646	1.07862
ENSMUSG00000003934	-0.31937	0.03701	-0.08603	-0.36883	1.34722	1.09722	1.375	1.15278
ENSMUSG00000003948	-0.3485	0.08055	0.14212	-0.1068	1.70339	2.12288	2.90254	1.97034
ENSMUSG00000003949	0.03563	0.90482	0.59996	0.62613	2.60169	2.81356	2.77119	1.16102
ENSMUSG00000003955	0.16734	0.26953	-0.04143	-0.24203	1.01352	1.14437	1.00145	1.25881
ENSMUSG00000003970	0.21333	-0.02644	0.27187	-0.05057	1.02276	1.07152	1.04391	1.21699
ENSMUSG00000003974	3	1.5	2	3	1.07143	0.642857	0.714286	0.571429
ENSMUSG00000003992	0.00296	0.14945	0.02811	-0.00344	0.991626	1.36404	1.22433	0.962098
ENSMUSG00000004018	-0.14941	-0.35112	0.01559	-0.46153	0.718938	0.984318	1.14113	1.38963
ENSMUSG00000004031	-2.02513	-2.35357	-2.3413	-2.10763	0.217593	0.138889	0.143519	0.0787037
ENSMUSG00000004032	-0.01762	-0.35581	-0.2109	-0.39444	1.01065	1.37977	1.34295	1.252
ENSMUSG00000004035	-0.06687	0.3203	-0.27528	0.08618	1.13404	1.16755	0.765432	1.17108
ENSMUSG00000004038	0.666667	0.833333	0.5	1	0.733333	0.533333	0.666667	0.733333
ENSMUSG00000004040	0.37835	0.827	0.19885	-0.19967	0.794163	0.972806	1.0776	0.816493
ENSMUSG00000004043	-0.29886	0.74582	0.86818	0.24783	1.22449	1.38776	0.591837	1.75
ENSMUSG00000004044	0.33659	0.1285	0.21946	-0.12181	0.772588	0.92372	0.982256	1.04752
ENSMUSG00000004054	0.65418	0.60208	0.51419	0.40675	0.996845	0.886435	0.984227	0.776025
ENSMUSG00000004056	0.37273	0.59287	0.34579	0.1475	0.962722	1.29135	1.22657	0.932682
ENSMUSG00000004069	-0.11005	0.3716	0.51427	0.46544	0.804274	1.04031	1.49733	1.04711
ENSMUSG00000004070	0.18596	0.13976	0.30081	0.11201	0.938367	1.03324	1.31688	0.993546
ENSMUSG00000004071	-0.00466	0.39853	0.5106	0.21097	0.760942	1.0964	1.3759	1.04266
ENSMUSG00000004085	0.46223	0.45893	0.67596	0.70199	1.12874	1.93413	1.4506	2.05988
ENSMUSG00000004096	-0.03324	-0.19201	-0.20994	-0.40175	1.07008	1.43008	1.39729	1.46316
ENSMUSG00000004098	0.67663	0.875	0.31835	0.14413	0.617647	0.382353	1.23529	0.382353
ENSMUSG00000004099	-0.25002	-0.61599	-0.39815	0.0141	0.80621	1.07311	1.14292	1.41665
ENSMUSG00000004100	0.31725	0.68936	0.38421	0.20829	1.03176	1.14764	0.896996	0.972532
ENSMUSG00000004105	0.62936	0.66162	0.44138	0.56308	0.621078	0.925986	1.30893	1.06195
ENSMUSG00000004110	1.34946	0.58776	0.46005	0.50029	1.55172	1.32759	1.00862	1.0431
ENSMUSG00000004113	0.485	1.41097	0.05429	0.28196	0.911765	0.588235	0.676471	0.0588235
ENSMUSG00000004127	0.21457	0.35266	0.09746	0.16009	1.17117	1.03453	1.22823	0.864865
ENSMUSG00000004151	0.02617	0.24541	-0.2969	0.3238	1.94118	1.41432	0.716113	1.08696
ENSMUSG00000004187	1.07472	0.59021	1.188	0.1603	0.927711	0.927711	0.614458	0.819277
ENSMUSG00000004207	0.39238	0.54732	0.51837	0.62327	1.25961	1.30753	1.29981	1.19168
ENSMUSG00000004221	0.30985	0.16713	0.26484	0.97309	0.899192	1.35378	1.07893	0.797432
ENSMUSG00000004231	0.75	0.75	0.875	1.25	0.821429	0.964286	0.178571	0.607143
ENSMUSG00000004233	0.06181	-0.54519	-0.57999	0.07433	0.709981	0.86629	0.73823	0.915254
ENSMUSG00000004263	0.14901	0.33715	0.26645	0.30554	2.13248	1.60684	1.6453	1.35897
ENSMUSG00000004264	0.35145	0.60396	0.43884	0.36807	1.15493	1.04776	1.30067	1.53092
ENSMUSG00000004266	2.20627	2.45192	2.09586	2.19215	0.694444	0.555556	0.435185	0.953704
ENSMUSG00000004267	-0.53754	0.175	0.23595	0.21372	0.402597	0.441558	1.02597	0.616883
ENSMUSG00000004268	0.11531	0.14524	0.24574	-0.02233	0.972089	1.16657	1.21008	1.08703
ENSMUSG00000004270	0.56428	0.7956	0.2751	0.73646	1	0.667406	0.932003	1.02291
ENSMUSG00000004285	-0.02945	-0.02025	0.11947	-0.25103	1.19479	1.18105	1.20445	1.02837
ENSMUSG00000004296	2.5	0.5	2.33333	0.833333	0.545455	0.909091	0.727273	0.818182
ENSMUSG00000004317	0.55115	0.56072	0.71468	0.76255	1.17996	1.55751	1.40538	1.36827
ENSMUSG00000004319	-0.13832	-0.20504	-0.06379	-0.29581	0.975898	1.2002	1.38859	1.38859
ENSMUSG00000004328	0.93046	0.60461	0.97439	1.99473	1.23448	2.62759	1.88276	1.26897
ENSMUSG00000004341	-1.16977	-0.92262	-0.90872	-0.83714	1	1.36364	2.45455	3.45455
ENSMUSG00000004344	10	5	8	1	2.6	0.8	0.4	0.4
ENSMUSG00000004347	0.05398	-0.03524	-0.04402	0.49856	1.30159	3.00317	3.57778	1.77143
ENSMUSG00000004356	0.04204	0.05642	0.15341	-0.00653	0.886006	1.20111	1.23355	1.29101
ENSMUSG00000004359	-0.36319	-0.30874	-0.32192	0.0737	0.588015	0.483146	0.475655	2.62547
ENSMUSG00000004360	0.62835	0.41253	0.51414	0.43843	2.07143	1.42857	1.53571	0.678571
ENSMUSG00000004364	-0.28661	-0.30074	-0.44912	-0.74748	1.23105	1.33007	1.40485	1.15008
ENSMUSG00000004366	0	1	1	2	0.5	1	0	0.5
ENSMUSG00000004371	2.33333	0.666667	2	2.66667	0.625	0.875	2	1.125
ENSMUSG00000004383	-0.76151	-0.65651	-0.54128	-0.94708	1.10092	1.98394	1.97936	0.90367
ENSMUSG00000004393	0.00343	0.26313	0.07786	0.20816	0.740367	0.886697	1.09587	1.01651
ENSMUSG00000004394	0.33667	0.72533	0.64923	0.70584	1.32837	1.29489	1.3906	1.45553
ENSMUSG00000004415	1.31114	0.32231	0.65014	0.48637	0.463964	1.62613	0.648649	1.1982
ENSMUSG00000004446	0.11023	0.44784	0.35799	0.10949	1.03728	0.764992	1.0389	1.23339
ENSMUSG00000004451	0.09672	0.44145	0.08401	0.1458	1.05468	0.758673	1.046	1.15498
ENSMUSG00000004455	-0.1509	-0.40558	-0.55234	-0.76259	0.849206	1.10476	1.10265	1.60899
ENSMUSG00000004460	-0.22228	-0.04864	-0.51443	-0.41391	0.868171	1.19359	0.807601	0.954869
ENSMUSG00000004462	-0.08953	-0.1718	0.30665	0.03624	0.944156	0.781818	1.08961	1.08442
ENSMUSG00000004473	0.33918	0.20171	0.08727	0.0103	1.10843	0.710843	1.28916	1.01205
ENSMUSG00000004500	0.88289	0.04247	0.18802	0.62934	0.684211	0.792763	0.805921	0.766447
ENSMUSG00000004508	-0.15395	-0.07023	-0.09947	-0.45993	0.911099	1.13473	1.31088	0.911651
ENSMUSG00000004530	0.00116	0.05894	0.04435	0.08839	1.02165	0.6376	1.38652	1.37044
ENSMUSG00000004535	-0.18566	-0.05693	-0.24985	-0.15883	1.02187	1.24251	1.27543	1.50577
ENSMUSG00000004540	-0.30362	0.13192	0.11711	-0.00858	1.70714	1.04286	1.46429	0.428571
ENSMUSG00000004542	0.75	0.75	1.25	0.5	0.75	0	0.833333	0.833333
ENSMUSG00000004552	-1.68012	-2.2899	-1.46523	-1.74521	0.39726	0.383562	1.0137	1.05479
ENSMUSG00000004558	0.11123	-0.17557	0.41505	-0.36895	0.510956	0.456175	0.850598	1.14641
ENSMUSG00000004561	0.08346	0.5328	0.33362	-0.35624	0.577532	0.908228	0.740506	0.327532
ENSMUSG00000004562	0.27574	0.00167	0.12153	-0.13892	0.901146	1.54441	1.4298	2.67479
ENSMUSG00000004565	0.28889	0.63093	0.32432	0.42813	0.902854	0.766149	1.08963	0.614422
ENSMUSG00000004567	0.02748	0.58905	0.38197	0.36623	1.03806	0.856327	1.16746	0.768792
ENSMUSG00000004568	-0.52915	0.00305	-0.22635	-0.18143	0.99646	1.17876	0.734513	1.45487
ENSMUSG00000004591	-0.13543	-0.28032	-0.29708	-0.34259	1.09675	1.61917	1.33333	1.53738
ENSMUSG00000004609	0.17751	0.55942	1.15477	1.40389	1.53846	3	1.65385	0.538462
ENSMUSG00000004610	0.178	-0.03056	0.0262	-0.046	0.947304	1.0265	0.949769	1.01202
ENSMUSG00000004612	0.25	0	0.1875	0.875	2	1	2.66667	4.5
ENSMUSG00000004626	0.28962	0.8258	0.38265	0.65235	1.05873	1.02743	1.05023	0.648764
ENSMUSG00000004630	10	14	2	1	1.08333	2.08333	0.583333	0.0833333
ENSMUSG00000004631	-0.15765	0.01208	0.00818	0.19534	1.05989	1.35209	1.34899	1.09086
ENSMUSG00000004633	-0.13718	0.48766	0.56714	0.3438	0.769912	1.03245	1.01327	1.53392
ENSMUSG00000004637	0.0483	0.43062	0.2737	0.40861	1.39044	1.01992	1.50332	1.16733
ENSMUSG00000004642	0.09492	0.13771	0.0973	0.22403	0.890187	0.923323	1.20794	1.56059
ENSMUSG00000004651	0.00605	-0.7108	-0.81919	-0.69861	0.75	0.557692	0.5	0.480769
ENSMUSG00000004654	0.571429	0.857143	1.28571	1	1.1875	0.8125	0.4375	0.5625
ENSMUSG00000004655	-0.58374	-0.79457	-0.07535	-0.83077	0.34	0.24	0.9	0.54
ENSMUSG00000004661	-0.01503	0.20323	-0.20596	0.19804	1.11149	1.56757	0.939189	1.23649
ENSMUSG00000004665	0.19848	0.16995	0.06503	-0.13971	1.04581	2.47191	1.22731	1.63699
ENSMUSG00000004667	0.25217	0.2816	0.38477	0.179	0.926927	1.19834	1.1572	0.980964
ENSMUSG00000004668	-0.72555	-1.16949	-1.20175	-0.38567	1.096	1.24	0.84	0.784
ENSMUSG00000004677	0.53317	0.44099	0.17627	0.16028	0.783203	1.48828	1.33984	0.603516
ENSMUSG00000004698	-0.08195	-0.25039	-0.38398	-0.32336	1.02155	0.814655	0.853448	0.943966
ENSMUSG00000004707	0.333333	0.333333	0.583333	0.5	2	0.9	1.1	1.3
ENSMUSG00000004709	-0.83936	-0.42514	-0.55143	-0.38971	1	0.823529	0.794118	0.735294
ENSMUSG00000004730	-0.58339	-0.60067	-0.78135	-0.11828	1.14773	1.80682	1.80682	0.125
ENSMUSG00000004748	-0.39009	0.23447	-0.00507	-0.08078	0.866337	0.717822	0.638614	1.54455
ENSMUSG00000004768	0.49858	0.77311	0.62545	0.88728	0.789873	0.981013	0.848101	0.696203
ENSMUSG00000004771	0.45568	0.39557	0.31101	0.1899	1.05276	1.13091	1.37753	1.34012
ENSMUSG00000004788	0.21537	0.49448	0.32015	0.36482	0.843342	0.775457	0.94517	1.12402
ENSMUSG00000004789	0.18225	0.69372	0.48357	0.48556	0.766593	0.857415	1.07621	0.793585
ENSMUSG00000004791	-0.36326	-0.5459	-0.10203	-0.21339	0.475	0.35	0.925	0.75
ENSMUSG00000004798	-0.11478	-0.21713	-0.21558	-0.50286	0.821994	1.35974	1.10904	0.773532
ENSMUSG00000004814	-0.76199	-0.92162	-0.83184	-1.18616	0.818182	0.454545	2	0.545455
ENSMUSG00000004815	-0.42043	-0.14068	-0.00502	0.06258	0.599349	0.912052	0.628664	0.566775
ENSMUSG00000004821	0.4	0	0.4	0	0.5	0.333333	0.5	0.333333
ENSMUSG00000004837	0.35646	-0.77807	0.95729	0.27711	0.269841	0.674603	0.015873	0.746032
ENSMUSG00000004842	-0.08451	1.23077	0.02978	0.12083	1.09091	1.13636	0.636364	0.681818
ENSMUSG00000004843	-0.25506	-0.25074	-0.27291	-0.28424	1.14296	1.0968	1.4557	1.40432
ENSMUSG00000004846	0.30766	0.74838	0.03889	-0.01589	1.12681	1.59783	0.896739	1.38406
ENSMUSG00000004849	0.45893	0.86195	0.46217	0.4683	1.07213	0.804401	1.15159	1.24817
ENSMUSG00000004864	0.60817	0.64666	0.40045	0.00971	0.86918	1.38137	1.05322	1.02882
ENSMUSG00000004865	0.07043	-0.0717	0.16847	0.10821	0.852826	1.04396	1.03231	0.949241
ENSMUSG00000004872	-0.73603	-0.60695	-0.35515	-0.2884	1.06977	0.860465	0.674419	1.65116
ENSMUSG00000004880	-0.1386	-0.06437	0.19598	-0.16965	0.88929	0.670578	1.31649	1.03911
ENSMUSG00000004885	0.20759	-0.00424	0.00806	0.08141	1.5	0.5	1.45455	1.36364
ENSMUSG00000004891	0.464	-0.14096	-0.08201	-0.23322	0.72973	0.891892	0.927928	0.576577
ENSMUSG00000004892	0.29174	-0.60772	0.06908	-0.3607	1.1358	0.234568	0.518519	0.45679
ENSMUSG00000004894	0.75	2.5	1.25	0	0.846154	0.0769231	0.0769231	0.307692
ENSMUSG00000004895	-0.23718	0.16302	0.38589	0.10382	0.9375	0.6625	0.91875	0.625
ENSMUSG00000004896	0.18979	0.29938	0.53518	-0.22948	0.597039	0.401316	1.0625	0.978618
ENSMUSG00000004897	0.19751	0.24702	0.23126	-0.0523	0.716773	0.915423	0.861052	0.892679
ENSMUSG00000004902	0.26597	0.54309	0.45918	0.48356	0.848485	0.612121	1.40606	1.30303
ENSMUSG00000004929	-0.27983	0.1698	-0.14804	-0.12758	1.375	1.31731	1.41026	1.22115
ENSMUSG00000004931	0.41795	0.30784	0.33167	-0.08446	1.18621	1.04138	1.30345	1.24138
ENSMUSG00000004933	0.33436	0.52375	-0.00897	0.65339	1.44604	1.46763	0.726619	0.604317
ENSMUSG00000004934	-0.07293	-0.17457	0.03701	-0.44024	0.816248	0.93617	0.83559	0.725338
ENSMUSG00000004936	-0.48737	-0.21313	-0.03801	-0.01937	0.698692	0.574758	0.706083	1.4332
ENSMUSG00000004937	0.3096	0.64282	0.2651	0.24041	1.09264	0.982713	1.4375	1.07092
ENSMUSG00000004939	1.2	0.6	1.2	1.4	1.66667	1.66667	1.88889	1.66667
ENSMUSG00000004945	0.00246	0.03732	0.20437	-0.50259	1.06048	1.2473	1.11987	1.07883
ENSMUSG00000004947	0.53113	1.1548	1.00126	0.7911	0.75	1.10772	0.647358	0.772358
ENSMUSG00000004948	0.02748	0.00409	-0.16121	0.13872	0.772509	0.88324	0.955997	0.912111
ENSMUSG00000004951	-0.07065	-0.19056	0.01653	0.19429	1.7381	0.666667	0.964286	0.964286
ENSMUSG00000004952	-0.10629	-0.35468	-0.0758	0.36109	0.454405	0.553323	0.950541	0.896445
ENSMUSG00000004961	0.15714	-0.25724	-0.82591	-0.26645	2.35211	1.21127	0.873239	0.971831
ENSMUSG00000004980	0.02417	0.11468	-0.0092	0.11309	0.973739	1.39604	1.34437	1.46363
ENSMUSG00000004988	0.17471	0.39826	0.4624	0.52897	1.60526	0.315789	0.473684	1.07895
ENSMUSG00000004994	-0.0354	0.29719	0.17332	0.01527	1.00334	1.14119	1.21303	0.847118
ENSMUSG00000004996	0.04765	0.5661	0.48134	0.83335	0.731618	0.694853	0.761029	0.919118
ENSMUSG00000005034	0.16746	0.17031	0.02546	0.07423	0.782533	1.1262	1.43406	1.12969
ENSMUSG00000005043	0.62881	0.53429	1.23193	-0.0486	1.23853	0.902141	0.400612	0.626911
ENSMUSG00000005045	0.33988	-0.27243	0.93072	-0.38908	0.5	0.0363636	0.0545455	1.19091
ENSMUSG00000005054	0.15383	0.29991	0.50572	0.27313	1.00802	1.22464	1.13352	1.44871
ENSMUSG00000005057	-0.42301	0.44844	0.8319	0.94633	2.19048	0.857143	11.5714	2.61905
ENSMUSG00000005069	-0.20013	0.34139	0.19273	0.19491	0.992837	1.35817	1.09169	1.19054
ENSMUSG00000005078	-0.02488	0.12107	0.19542	-0.23403	0.753938	0.701249	1.13254	0.69962
ENSMUSG00000005087	0.16792	0.23971	0.12654	-0.10741	1.09283	2.13713	1.4135	1.05485
ENSMUSG00000005089	0.02004	-0.41601	-1.04683	-0.06673	0.918919	2.22973	0.594595	0.824324
ENSMUSG00000005102	-0.14702	-0.48163	-0.69253	-0.62578	0.458333	0.556548	0.907738	0.825893
ENSMUSG00000005103	0.43525	0.53265	0.42245	0.38078	1.17383	0.952191	0.927238	1.02118
ENSMUSG00000005107	0.2416	1.34353	0.91575	1.49525	1.24242	0.757576	1.18182	1.18182
ENSMUSG00000005124	0.38313	0.35543	-0.36167	0.41056	1.12206	2.15882	1.48235	1.51912
ENSMUSG00000005125	0.66607	1.15091	0.78595	1.27313	1.13922	1.45686	0.872549	1.47059
ENSMUSG00000005131	0.097	0.57193	0.27277	0.29583	1.20206	1.88454	2.48247	2
ENSMUSG00000005142	0.44141	0.26022	0.71174	0.63639	0.618182	1.01212	1.74091	1.67424
ENSMUSG00000005148	0.47236	0.01752	0.14918	-0.047	3.22078	2.25974	3.37662	1.8961
ENSMUSG00000005150	0.10271	0.1017	0.42517	0.35916	0.992381	0.761905	0.965714	0.628571
ENSMUSG00000005161	-0.0674	-0.30218	-0.14263	-0.32272	1.02338	1.27565	1.18805	1.3279
ENSMUSG00000005198	-0.20358	-0.05133	-0.29787	-0.41244	0.698239	1.02142	0.650167	0.752499
ENSMUSG00000005202	-0.24813	-1.35303	-0.52046	-0.61044	0.893891	0.578778	0.508039	1.19936
ENSMUSG00000005204	-0.17642	-0.39655	-0.26214	-0.13463	1.00857	0.908028	0.791894	1.33827
ENSMUSG00000005220	0.31765	0.58322	0.63171	-0.10135	0.641975	1.2963	1.39506	0.691358
ENSMUSG00000005225	-0.35942	-0.51277	-0.226	-0.45972	0.979407	0.980231	1.37727	1.52636
ENSMUSG00000005232	0.14596	0.53946	0.58622	0.41194	0.550802	0.780749	2.60428	0.491979
ENSMUSG00000005233	0.06336	0.2212	0.25628	0.18118	0.961375	1.01698	1.49745	1.21307
ENSMUSG00000005237	0.65408	1.20477	-0.31426	1.12082	0.985507	0.521739	3.76812	1.65217
ENSMUSG00000005251	-0.15923	1.29241	1.45083	1.03109	0.724409	0.972441	3.83858	1.82677
ENSMUSG00000005262	0.3518	0.45279	0.61601	0.55166	0.957155	0.671808	1.4036	1.1521
ENSMUSG00000005267	0.35999	0.36564	0.16839	0.25185	0.90681	0.913978	0.777778	0.960573
ENSMUSG00000005268	0.36213	0.8195	0.337	0.88742	0.503686	0.706388	1.21007	2.414
ENSMUSG00000005299	0.08482	0.6374	0.29481	0.4212	0.679936	0.996815	1.19904	0.971338
ENSMUSG00000005312	-0.08114	-0.29704	-0.19907	-0.12957	1.00706	1.3663	1.02119	1.58224
ENSMUSG00000005320	-0.55697	-0.00758	0.17076	0.47579	0.559322	1.25424	1.20339	0.762712
ENSMUSG00000005338	0.1727	0.13973	0.16167	-0.28669	2.40909	1.77273	0.954545	0.636364
ENSMUSG00000005339	2.5	0.25	0.5	1.25	0.0952381	0.952381	0.380952	0.190476
ENSMUSG00000005354	0.14691	0.04426	0.09464	-0.14075	1.0147	0.830095	1.1714	0.9858
ENSMUSG00000005355	0.28723	0.714286	1.28571	0.73885	0.823529	0.470588	0.117647	0.529412
ENSMUSG00000005357	0.45806	0.43377	1.04089	-0.0213	1.6371	0.903226	1.30645	0.935484
ENSMUSG00000005360	0.08546	0.21783	0.05183	0.41406	0.731183	1.74839	1.34409	1.4086
ENSMUSG00000005362	-0.21194	0.03054	0.12963	-0.1282	0.925489	1.01309	1.1251	0.963957
ENSMUSG00000005364	-0.05751	0.3125	-0.10584	-0.06177	1.13889	0.444444	0.638889	0.583333
ENSMUSG00000005370	0.32094	0.42674	0.20693	0.18932	1.09603	1.21921	1.492	1.03549
ENSMUSG00000005371	-0.20229	-0.21747	-0.26037	-0.51045	0.824718	1.26679	1.29471	1.37374
ENSMUSG00000005373	0.11221	0.1034	0.18994	0.12196	2.18391	1.29885	1.25287	1.41379
ENSMUSG00000005374	-0.17607	0.02844	0.26102	0.26524	0.638665	0.388953	0.820483	0.680092
ENSMUSG00000005378	0.34393	0.75856	0.38694	0.92019	2.04936	2.14442	1.50091	1.29799
ENSMUSG00000005397	0.13249	0.3703	0.06577	0.08609	1.03981	1.17206	1.14011	1.05273
ENSMUSG00000005410	0.17401	0.39476	0.07838	0.14359	0.851042	1.1093	0.997966	1.0305
ENSMUSG00000005413	0.60349	0.46068	1.05037	1.0407	1.06723	1.08037	1.53014	1.17774
ENSMUSG00000005417	-0.02602	0.15135	-0.19386	-0.28078	0.955516	1.4089	1.1089	1.10214
ENSMUSG00000005442	0.1056	0.108	-0.01278	-0.14536	1.08444	1.14444	1.53778	1.30444
ENSMUSG00000005447	0.398	0.21531	0.2271	0.06936	1.04723	1.00429	1.16488	1.1082
ENSMUSG00000005465	-0.49535	0.17473	-0.36171	-0.27622	0.894737	0.410526	0.494737	0.494737
ENSMUSG00000005469	0.13099	0.10018	-0.08173	-0.39904	0.8125	1.1859	0.964744	0.939103
ENSMUSG00000005470	0.36271	0.53492	0.20887	0.41175	1.04555	0.903886	0.92102	0.653155
ENSMUSG00000005474	0.5	0.333333	0.5	1.33333	0.466667	0.466667	0.466667	0.933333
ENSMUSG00000005481	-0.18018	-0.19598	-0.1672	0.12724	0.817974	1.00458	0.953635	1.42816
ENSMUSG00000005483	-0.05032	0.22759	0.1318	0.31644	0.698238	0.992658	1.15125	1.48605
ENSMUSG00000005493	0.07788	-0.41972	-0.10466	-0.05791	1.1639	0.824228	1.28029	0.88361
ENSMUSG00000005501	0.09991	-0.21316	0.09826	0.13693	0.776463	1.58468	1.50747	1.41594
ENSMUSG00000005503	-1.13175	-0.91877	-0.70832	-0.87411	0.666667	0.809524	1.09524	1.2381
ENSMUSG00000005505	0.3123	0.35213	0.46298	0.67682	0.692384	1.05539	0.983185	0.705242
ENSMUSG00000005506	0.12233	-0.03477	-0.06961	0.48234	1.35962	2.09423	1.52179	1.62179
ENSMUSG00000005510	-0.02341	-0.05811	-0.02428	-0.27811	0.942437	1.13577	1.28781	1.46685
ENSMUSG00000005514	0.62951	0.76587	0.60932	0.47892	0.84106	0.823841	1.02649	0.537748
ENSMUSG00000005533	0.03922	-0.23691	-0.07714	-0.39863	1.10738	1.23929	1.32238	1.73905
ENSMUSG00000005534	-0.04185	-0.29267	-0.43368	-0.77204	0.913274	0.929204	0.940708	1.38319
ENSMUSG00000005540	0.19455	1.54545	-0.07552	0.14326	0.793103	0.827586	0.586207	0.413793
ENSMUSG00000005547	3	1	2	7	2.66667	1.16667	1.5	0.333333
ENSMUSG00000005553	0.63849	0.7976	0.48225	0.49856	0.820312	0.813616	0.952009	0.22433
ENSMUSG00000005566	0.00426	-0.22937	-0.14637	-0.52413	0.765164	0.830738	1.01352	1.11762
ENSMUSG00000005575	0.38132	0.4201	0.05517	0.04221	0.810127	0.843038	0.772152	1.13418
ENSMUSG00000005580	0.56222	0.30346	-0.02126	-0.13701	0.919101	0.797753	1.20449	1.07416
ENSMUSG00000005583	0.17727	-0.10503	-0.25331	0.5886	1.13227	1.1099	0.477955	0.748243
ENSMUSG00000005609	0.10292	0.35017	0.14964	0.19602	0.94057	1.08448	0.955305	1.02701
ENSMUSG00000005610	-0.08816	0.15319	0.17527	0.15424	0.944423	1.12979	1.20055	1.06018
ENSMUSG00000005611	0.4929	0.02305	0.36201	-0.29244	0.995575	1.31858	1.20796	0.946903
ENSMUSG00000005615	-0.25526	0.36694	-0.24634	-0.04578	0.532931	0.699698	0.549849	0.60423
ENSMUSG00000005621	-0.41623	0.26999	-0.10622	-0.12735	0.692864	1.34146	0.999097	0.880759
ENSMUSG00000005625	0.10425	0.5148	0.33208	0.41239	0.860495	0.827645	0.851394	0.922071
ENSMUSG00000005628	-0.84806	-0.95765	-0.7587	-1.05817	2.2	3.72	0.12	0.32
ENSMUSG00000005640	1.24853	0.9322	0.6189	1.14293	1.82569	1.17431	3.41284	1.53211
ENSMUSG00000005649	-0.16307	0.818182	0.727273	0.43425	0.947368	1.47368	1	0.789474
ENSMUSG00000005656	0.31659	0.29528	0.24555	-0.02126	1.0745	0.985727	1.04239	0.944853
ENSMUSG00000005667	0.34355	0.78294	0.60361	0.88205	0.915375	1.07032	0.966627	1.24315
ENSMUSG00000005672	0.2335	0.52395	0.44749	0.39564	0.951361	1.09771	1.16776	0.696869
ENSMUSG00000005674	0.18448	-0.07849	0.04935	-0.13967	1.42534	1.22624	1.35747	1.64253
ENSMUSG00000005677	0.12392	0.90162	0.21658	0.27915	1.35714	2	1	4.14286
ENSMUSG00000005681	4	1	1	0	0.285714	0.428571	0.428571	0
ENSMUSG00000005682	-0.20616	-0.11208	-0.2765	-0.02529	0.788606	1.05547	1.27586	0.956522
ENSMUSG00000005683	0.26212	0.27715	0.36455	0.2755	0.917335	1.03229	1.04099	1.06458
ENSMUSG00000005686	0.42581	0.93655	1.06353	0.72026	0.686427	0.215289	0.531981	1.15289
ENSMUSG00000005687	0.06758	-0.00099	0.07974	-0.02753	1.39816	1.55294	1.55478	1.41618
ENSMUSG00000005696	-0.15154	-0.12336	-0.15275	0.94989	0.944444	0.527778	0.194444	0.555556
ENSMUSG00000005698	-0.18446	-0.37362	-0.29434	-0.2736	0.668369	1.07933	0.706844	0.89411
ENSMUSG00000005699	0.052	0.01366	-0.1109	0.12232	0.718157	0.818428	0.631436	0.772358
ENSMUSG00000005705	0.21897	0.12955	-0.19439	0.18431	0.461538	1.34615	1.07692	0.0769231
ENSMUSG00000005716	0	0.666667	0.333333	0	1.16667	0.5	0.333333	0.666667
ENSMUSG00000005718	-0.06251	0.11955	-0.14375	-0.13989	1.3113	1.36461	1.23667	1.07036
ENSMUSG00000005732	0.30141	0.00727	-0.03588	-0.14268	0.996176	1.11726	1.18506	1.77721
ENSMUSG00000005763	-0.17279	-0.07769	-0.9703	-0.74742	1.08571	0.628571	0.8	0.8
ENSMUSG00000005774	-0.35514	-0.24255	-0.15577	-0.37578	0.737991	0.951965	0.735808	1.05895
ENSMUSG00000005779	-0.07791	-0.23998	-0.17383	-0.21744	0.691503	0.883224	0.921133	1.24619
ENSMUSG00000005800	1.60777	0.14116	0.41155	0.22626	0.8	0.6	0.2	0.266667
ENSMUSG00000005802	-0.35751	-0.55165	-0.32628	-0.61643	0.822326	1.08744	1.09209	1.22884
ENSMUSG00000005803	-0.30154	-0.16104	-0.4516	-0.41183	0.913253	0.857831	1.19036	0.959036
ENSMUSG00000005804	0.15276	0.35331	0.09576	0.17428	0.982932	0.917671	1.19578	1.26707
ENSMUSG00000005813	0.12237	0.32775	0.05702	0.15005	0.452881	0.675254	0.740339	0.960678
ENSMUSG00000005823	0.07275	0.57213	0.33118	0.39629	0.823333	0.784167	1.16917	0.939167
ENSMUSG00000005824	-0.08982	3.22222	1.22222	-0.08466	0.44	0.04	0.12	0.2
ENSMUSG00000005836	-0.15669	-0.59664	-0.50965	-0.57115	0.955319	1.17766	1.20532	1.28883
ENSMUSG00000005846	-0.16165	-0.48208	-0.23297	-0.35771	1.03734	1.0422	1.11535	1.11407
ENSMUSG00000005864	-0.75145	-0.51174	-0.8706	-0.6269	0.725	0.15	0.225	0.225
ENSMUSG00000005871	0.0135	0.00158	-0.09386	0.76787	0.858949	1.66068	0.937458	1.43713
ENSMUSG00000005873	0.18075	0.26403	0.31777	0.24758	0.917319	0.941434	1.09615	0.991857
ENSMUSG00000005881	0.28839	0.42813	0.35443	0.20453	1.06744	1.10391	1.16584	0.877344
ENSMUSG00000005882	-0.29181	-0.31743	0.13945	0.02631	0.887446	1.17857	0.554113	0.808442
ENSMUSG00000005883	0.87135	1.17769	0.74363	0.67106	0.396226	0.679245	1.84906	0.0754717
ENSMUSG00000005886	0.10989	0.27052	-0.32154	-0.60637	1.12921	1.05818	0.926516	0.81384
ENSMUSG00000005891	1.66667	0.666667	0	0	1.5	1	0.5	0.5
ENSMUSG00000005892	-0.30278	-0.11635	0.00613	0.04206	0.114286	0.485714	0.485714	0.742857
ENSMUSG00000005893	-0.03978	-0.30945	-0.38911	0.0228	0.980066	1.41196	1.4897	1.41993
ENSMUSG00000005897	0.21291	-0.26898	-0.09501	0.01682	1.22056	1.50107	1.95289	1.15203
ENSMUSG00000005899	-0.18039	-0.13144	0.02216	-0.10183	1.00467	1.29055	1.43057	1.1727
ENSMUSG00000005907	-1.13493	0.27239	0.15132	0.06777	0.648097	0.65831	1.80037	1.03435
ENSMUSG00000005917	0.19353	-0.38572	-0.07536	0.33937	0.557377	0.377049	0.180328	1.32787
ENSMUSG00000005936	0.36318	0.41295	0.57013	0.52033	0.813039	0.965964	1.16107	1.30153
ENSMUSG00000005947	0.11092	0.12073	-0.33502	-0.21405	1.84211	1.10526	1.31579	2.89474
ENSMUSG00000005949	-0.50959	0.12792	0.29611	-0.29069	0.594366	1.09014	1.18732	0.785915
ENSMUSG00000005950	-0.13939	0.222222	0.444444	-0.45603	0.423077	0.384615	0.153846	0.269231
ENSMUSG00000005951	0.44341	0.28738	-0.14522	-0.15018	4.23077	4.69231	4.15385	1.23077
ENSMUSG00000005952	9	4.5	6	4.5	0.367347	0.22449	0.204082	0.22449
ENSMUSG00000005958	0.36916	0.26515	0.85259	0.91028	2.08	1.68	0.96	2.72
ENSMUSG00000005968	-0.08379	0.22472	0.59072	0.93604	1.1086	2.10407	1.99095	3.18552
ENSMUSG00000005973	-0.045	0.13511	-0.22389	0.10827	0.930181	1.15448	1.61682	1.8895
ENSMUSG00000005980	0.43335	1.03181	0.45838	0.47976	2.32609	1.47826	1.13043	2.78261
ENSMUSG00000005981	0.381	0.59405	0.54739	0.56334	1.11541	1.06839	1.12254	0.917597
ENSMUSG00000005982	-0.09589	0.3235	0.44484	0.16082	1.21191	1.7709	1.32188	1.10538
ENSMUSG00000005983	0.21893	0.0942	0.15787	0.1918	0.945055	0.857143	0.868132	0.362637
ENSMUSG00000005986	0.14417	0.01643	-0.05946	-0.25379	0.893939	0.454545	1.09091	0.409091
ENSMUSG00000005994	-0.23617	1.5	0.428571	-0.13121	0.923077	0.384615	1.23077	0.307692
ENSMUSG00000006005	0.23507	0.24753	0.01875	-0.22715	0.79759	1.09398	1.261	1.34673
ENSMUSG00000006007	-0.5722	-0.48642	-0.38768	-0.50714	2.89474	0.789474	3.78947	1.05263
ENSMUSG00000006010	0.2546	0.45878	-0.06133	-0.04025	0.952055	1.18787	1.20401	1.40362
ENSMUSG00000006014	0.57063	-0.23808	0.65732	1.1032	0.254386	1.13158	0.517544	1.32456
ENSMUSG00000006019	0.36039	0.15663	0.02779	0.63715	1.29796	0.897959	0.877551	0.84898
ENSMUSG00000006021	-0.30213	-0.12102	-0.3168	0.51917	1.33495	1.77184	1.92233	1.70874
ENSMUSG00000006024	0.40623	0.68765	0.66421	0.65359	1.18006	1.31595	1.25247	1.09751
ENSMUSG00000006050	-0.08092	-0.20402	-0.13927	-0.4552	1.15406	1.33642	1.30103	1.24823
ENSMUSG00000006056	2	3	1	5	10	2	5	7
ENSMUSG00000006057	0.22245	-0.4151	-0.71051	-0.22886	0.911508	0.967857	1.0873	1.06905
ENSMUSG00000006058	0.16707	0.03452	0.19732	0.43137	0.833026	1.20203	0.7131	2.03875
ENSMUSG00000006095	0.24821	0.29718	0.24776	0.00416	1.07037	1.14286	0.97843	0.989392
ENSMUSG00000006127	0.21522	0.3025	0.27355	0.0354	1.17297	1.3444	1.50502	1.1861
ENSMUSG00000006134	-0.12364	0.56138	0.31409	0.21498	0.550622	0.85968	1.38188	1.35879
ENSMUSG00000006143	0.13995	0.411765	-0.17258	-0.43899	1.25	6	0.75	3.25
ENSMUSG00000006154	0.27448	-0.53281	-0.3589	-0.41105	2.19231	0.384615	1.05769	0.134615
ENSMUSG00000006169	-0.19476	-0.19107	-0.20678	-0.52766	1.25755	1.65559	1.4494	1.49547
ENSMUSG00000006179	0.11553	2.36364	-0.2483	0.25907	0.894737	0.315789	1	0.947368
ENSMUSG00000006191	-0.23611	0.01075	-0.32021	-0.34067	1.14363	1.56832	1.41382	1.53339
ENSMUSG00000006200	-0.39023	-0.07795	-0.35047	0.08938	1.0625	0.5625	0.5625	0.625
ENSMUSG00000006204	-0.31697	1.73333	-0.13489	0.09023	0.756757	1.2973	0.513514	0.675676
ENSMUSG00000006205	0.08614	-0.0347	-0.15233	-0.36159	0.899105	0.80854	0.988292	1.01446
ENSMUSG00000006215	0.78765	0.75873	0.46195	0.54705	0.51634	0.736383	1.04357	0.535948
ENSMUSG00000006216	1.2	1.6	0.8	0	0.6875	0	0.6875	0.1875
ENSMUSG00000006218	0.75	1.5	0.5	1	1	0.571429	0.857143	0.714286
ENSMUSG00000006219	0.24385	0.17379	0.06704	0.27845	1.38776	1.8322	2.44898	1.73016
ENSMUSG00000006221	-0.25674	-0.36712	-0.58256	-0.31597	0.810345	0.465517	0.948276	0.241379
ENSMUSG00000006235	0.33553	0.41047	0.27994	0.40425	1.6	1.04	1.36	0.28
ENSMUSG00000006241	-0.15741	-0.12225	0.32121	-0.27164	0.5875	0.7125	0.7	0.7625
ENSMUSG00000006262	-0.03845	-0.13302	-0.04271	0.34691	0.80853	0.936486	0.925359	0.873899
ENSMUSG00000006269	-0.92964	-0.6568	-0.46975	-0.38929	2.26882	0.516129	0.870968	0.677419
ENSMUSG00000006270	0	1	1	15	0.454545	1.45455	0	0
ENSMUSG00000006273	-0.00055	0.12035	-0.1666	-0.20217	1.17735	1.08286	1.14661	1.17023
ENSMUSG00000006276	0.15896	0.08224	0.31114	0.11041	0.684968	1.03092	1.20949	1.04264
ENSMUSG00000006281	0.06183	0.19908	0.07676	-0.60187	1.11365	1.05724	1.0646	0.88798
ENSMUSG00000006288	0.35655	0.51827	0.62916	0.49228	0.873638	0.986767	1.18293	0.659315
ENSMUSG00000006289	0.087	-0.0519	-0.06601	-0.10259	1.08359	1.43885	1.29567	1.33437
ENSMUSG00000006299	0.58616	0.6023	0.6689	0.66316	0.939774	1.22067	0.909419	0.857384
ENSMUSG00000006301	0.35405	0.41918	0.46398	0.72787	0.802068	0.554653	0.685377	1.06721
ENSMUSG00000006304	0.1029	0.03497	0.06253	-0.16847	0.893997	1.21743	1.07408	1.05943
ENSMUSG00000006307	0.54786	0.78627	0.60192	0.47543	0.969697	1.27273	1.55478	1.30536
ENSMUSG00000006310	-0.19204	0.27133	0.16044	-0.23929	0.456311	0.932039	0.970874	0.543689
ENSMUSG00000006311	0.111111	0	0.222222	0.222222	1.8	0.4	0.2	0.6
ENSMUSG00000006313	0.28185	1.03864	1.48377	0.82531	1.14754	2.32787	2.21311	0.786885
ENSMUSG00000006315	0.16661	-0.01148	0.02702	-0.10181	0.873696	0.952491	0.951333	0.80533
ENSMUSG00000006333	0.22253	0.05688	0.33061	0.06809	0.900737	0.861918	0.880509	1.07046
ENSMUSG00000006335	0.1952	-0.0968	0.08664	0.24814	0.885827	0.698819	0.683071	0.370079
ENSMUSG00000006342	0.39325	0.83641	0.46501	0.80845	0.904762	1.69841	2.19048	1.90476
ENSMUSG00000006344	-0.14034	0.50449	0.21323	0.22409	0.798265	0.824295	0.737527	0.813449
ENSMUSG00000006345	0.9375	0.25	0.3125	0.25	2.3	2.8	0.5	1.8
ENSMUSG00000006356	0.39754	0.21616	1.0475	0.68022	0.436715	0.954589	0.894686	0.515942
ENSMUSG00000006360	0.05806	-0.84455	-0.10239	-0.48902	0.451977	0.706215	1.04802	0.884181
ENSMUSG00000006362	-0.20109	-0.36353	-0.23385	-0.39594	0.773494	1.26747	0.937349	1.26506
ENSMUSG00000006369	0.21461	0.37932	0.24223	0.14134	0.721121	0.771702	1.2242	1.34108
ENSMUSG00000006373	-0.0642	0.20699	0.00955	0.15917	0.87491	0.938492	0.970328	0.999729
ENSMUSG00000006378	0.06404	0.22255	0.36116	0.03774	1.05027	1.28007	1.62298	0.987433
ENSMUSG00000006386	-0.30892	-0.18808	-0.21727	0.20712	0.465116	0.72093	0.713178	0.972868
ENSMUSG00000006389	2.33333	1.33333	1.66667	2.33333	1.33333	0.916667	0.25	0.583333
ENSMUSG00000006390	0.05347	-0.27925	0.15746	0.25677	0.884643	0.974045	1.16871	0.877433
ENSMUSG00000006392	0.12499	0.13699	0.31276	0.20795	1.12733	0.81189	1.08429	1.04614
ENSMUSG00000006395	-0.1979	0.16592	-0.01556	-0.41309	0.805755	0.683453	1.58273	0.884892
ENSMUSG00000006398	0.27299	0.28228	0.52218	0.43936	0.477172	0.500736	1.05449	1.35346
ENSMUSG00000006403	0.58289	0.51273	0.28059	0.45996	0.621053	0.768421	2.11579	1.29474
ENSMUSG00000006411	0.44577	0.77017	0.86953	1.33582	0.684211	0.526316	2.68421	1.31579
ENSMUSG00000006412	0.43552	0.67052	0.56306	0.40916	0.781787	0.931844	0.823597	0.761168
ENSMUSG00000006418	0.18575	0.34801	0.24852	0.14311	0.846678	0.908306	0.960963	0.802326
ENSMUSG00000006423	-0.53305	-0.78725	-0.45779	-0.39368	0.91451	1.5851	1.14196	0.854902
ENSMUSG00000006435	0.69892	-0.06528	0.38029	-0.20692	2.76596	1.29787	0.808511	1.02128
ENSMUSG00000006442	0.36935	0.04513	0.22031	-0.09049	0.656371	0.926641	0.926641	1.44402
ENSMUSG00000006445	-0.37013	0.42697	0.44356	0.17964	1.21239	0.59292	1.16814	1.07965
ENSMUSG00000006456	0.62753	0.77007	0.62742	0.71039	0.9	1.13506	1.39091	0.877922
ENSMUSG00000006457	0.27348	0.39681	-0.00865	0.28828	0.821306	0.824742	0.556701	0.676976
ENSMUSG00000006462	-0.15796	1	0.198	0.08766	1.1	0.633333	0.666667	0.8
ENSMUSG00000006463	-0.11955	-0.2241	-0.19188	-0.16566	1.09516	0.958264	0.741235	0.893155
ENSMUSG00000006464	0.13375	0.01105	0.35026	-0.11596	0.910828	1.09554	0.611465	0.834395
ENSMUSG00000006469	1.5	0	0	0.5	1	0.375	0.125	0.75
ENSMUSG00000006471	0.50268	0.1327	0.32439	0.6198	0.773585	1.23113	1.39623	1.1934
ENSMUSG00000006476	0.4572	0.33621	0.07157	0.03113	1.26621	1.06143	1.35154	1.20478
ENSMUSG00000006488	0.25	0.25	0.75	1	2.07143	0.285714	0.5	0.0714286
ENSMUSG00000006490	3	1	2	0	4	0.5	0	2.5
ENSMUSG00000006494	0.21216	0.18676	0.02042	0.4139	0.901761	0.865616	1.40593	0.726599
ENSMUSG00000006498	0.28468	0.59931	0.61676	0.64067	0.792865	0.768839	0.786312	0.934838
ENSMUSG00000006517	-0.2515	0.00772	0.0396	0.12344	0.841709	0.603015	1.09548	0.68593
ENSMUSG00000006519	0.27469	0.107	-0.02472	0.10546	0.743764	1.04875	0.750567	0.741497
ENSMUSG00000006522	-0.03173	-0.37806	-0.13404	0.01766	1.64516	1.32258	2.41935	1.80645
ENSMUSG00000006526	0.21493	-0.17514	0.56259	0.38394	0.720339	0.745763	1.22034	0.65678
ENSMUSG00000006527	-0.43163	-0.24966	-0.41188	-0.76541	0.717046	0.863354	1.26846	0.978606
ENSMUSG00000006529	0.833333	0.333333	0.166667	0.166667	0.59375	0.21875	0.21875	0.40625
ENSMUSG00000006538	-1.13275	-0.62571	-0.80485	-0.85171	0.314815	0.0462963	0.166667	1.21296
ENSMUSG00000006542	0.928571	0.428571	0.357143	0.642857	0.59375	1.03125	1.1875	0.25
ENSMUSG00000006546	0.333333	0	0	0.333333	2	0	0.5	0
ENSMUSG00000006567	0.04922	0.22795	-0.24675	-0.67372	1.52353	1.42941	1.09412	0.952941
ENSMUSG00000006570	2	0	0	0	0.666667	0	0	0.333333
ENSMUSG00000006574	-2.55966	-2.41215	-0.75312	-0.67031	0.946237	0.129032	0.655914	1
ENSMUSG00000006575	1.20517	2	-0.02009	0.22428	4.22222	0.444444	0.333333	0.722222
ENSMUSG00000006576	0.53977	0.59017	0.32274	0.77997	0.819936	0.938907	0.967846	1.07717
ENSMUSG00000006585	-0.11346	0.04761	0.03058	0.06789	0.935282	1.12317	0.962422	1.01879
ENSMUSG00000006586	-0.30029	0.17511	0.01717	-0.10286	0.596758	1.37183	0.518744	0.809524
ENSMUSG00000006587	-0.12311	0.4197	0.56881	0.74872	1.87805	2.86179	2.56911	1.29268
ENSMUSG00000006589	0.04495	-0.07224	0.36482	-0.00414	0.732992	1.16752	1.10534	1.03072
ENSMUSG00000006599	-0.04929	0.1003	0.14326	-0.14879	0.737857	0.804163	1.10948	1.32305
ENSMUSG00000006611	-0.24029	0.00832	-0.7135	-0.12348	0.781588	0.788809	2.75632	1.7509
ENSMUSG00000006638	-0.55428	0.42006	-0.08372	0.22236	0.715278	0.868056	0.347222	1.13889
ENSMUSG00000006641	0.54971	2.39625	1.14016	2.0869	1.13333	0.986047	0.511628	0.64186
ENSMUSG00000006642	-0.26779	-0.10109	-0.23403	0.05483	2.1	1.5	2.43	1.28
ENSMUSG00000006649	-0.42181	0.647059	-0.01033	0.01569	0.806452	1.09677	0.322581	0.935484
ENSMUSG00000006651	-0.21475	-0.19615	-0.84431	0.49625	0.921875	1.29688	1.51562	0.53125
ENSMUSG00000006673	0.23228	0.37565	0.28862	0.04533	0.981293	1.20536	1.32654	0.968198
ENSMUSG00000006675	0.09859	0.18575	-0.01744	-0.0442	1.44444	1.1	2.44444	1.74444
ENSMUSG00000006676	-0.23342	-0.28381	-0.42582	-0.19893	1.17213	1.06089	1.0644	1.50234
ENSMUSG00000006678	-0.13251	-0.53478	-0.69739	-0.43678	1.01014	1.76182	1.15541	1.93074
ENSMUSG00000006699	0.09603	0.05123	0.06931	-0.01042	1.08362	1.50418	1.41274	1.28066
ENSMUSG00000006705	0.11895	0.93167	1.20597	1.24023	6.01078	6.08086	1.36388	8.18598
ENSMUSG00000006711	-0.0471	0.75699	0.61433	0.75357	1.375	1.29167	2.08333	0.0833333
ENSMUSG00000006715	-0.17083	-0.706	-0.08438	-0.26407	1.14672	1.46967	0.846721	1.5541
ENSMUSG00000006717	-0.06287	-1.09719	0.16806	0.0392	0.955163	0.995924	0.20856	0.862772
ENSMUSG00000006720	0.09677	0.68762	0.18808	0.60332	0.833333	0.945238	1.09286	0.567857
ENSMUSG00000006724	0.5	2.16667	1.16667	1.33333	3.14286	0.142857	0.571429	3.57143
ENSMUSG00000006728	0.05451	-0.01215	-0.03567	-0.07514	0.883535	1.00735	1.11174	1.06355
ENSMUSG00000006731	0.7421	3.75	0.39684	0.80602	2	0.666667	0.666667	2.33333
ENSMUSG00000006732	0.1243	-0.20821	-0.11064	-0.23376	1.01969	0.995855	1.00725	1.33472
ENSMUSG00000006736	0.40437	0.39403	0.47838	0.76672	2.26337	2.15354	1.55549	1.36458
ENSMUSG00000006740	0.06675	-0.22164	-0.27189	-0.1836	0.962629	1.28613	1.24696	2.03647
ENSMUSG00000006763	-0.13064	0.03937	-0.3435	0.09465	0.596983	0.787716	0.591595	0.71875
ENSMUSG00000006764	0.81608	0.83741	0.55365	0.09088	0.47619	1.40136	1.63946	1.12245
ENSMUSG00000006777	0.42459	0.571429	-0.25772	-0.31318	0.636364	1.72727	2.18182	0.545455
ENSMUSG00000006782	0.27584	0.83387	0.07662	0.36092	0.508	0.686	0.912	0.8
ENSMUSG00000006784	-0.11435	0.065	0.36789	0.27705	0.810127	0.873418	0.481013	0.936709
ENSMUSG00000006800	0.11491	0.16175	-0.09979	-0.02626	0.837643	1.16087	1.12632	1.16193
ENSMUSG00000006818	-0.11999	-0.00313	0.0818	0.00397	1.03011	1.09713	1.11753	1.07528
ENSMUSG00000006850	0.35615	0.61721	0.31201	-0.13865	0.747253	0.813187	0.835165	1.16484
ENSMUSG00000006906	-0.03302	-0.191	0.39093	-0.33398	1.30057	1.54057	1.33829	1.79543
ENSMUSG00000006920	0.10921	0.47007	0.23542	0.025	0.927629	0.937601	1.24831	0.812158
ENSMUSG00000006930	-0.47501	-0.24805	-0.82574	-0.31012	1.02198	0.846154	0.89011	1.02198
ENSMUSG00000006931	-0.0025	0.03546	-0.16179	-0.34053	0.726601	0.687192	1.14039	1.40148
ENSMUSG00000006932	0.08981	0.05301	-0.00541	-0.07876	0.857471	1.0546	0.994636	0.978161
ENSMUSG00000006941	0.09993	0.2769	0.23555	0.04	1.10326	1.18286	1.27558	1.00192
ENSMUSG00000006948	0.5	0	0.5	0.75	1.25	1.25	1	1
ENSMUSG00000006958	0.04196	0.37566	-0.27052	0.45155	0.804878	0.97561	2.17073	1.04878
ENSMUSG00000006998	0.06821	0.53126	0.30462	0.37548	0.942834	1.0634	1.05936	0.956231
ENSMUSG00000007021	-0.62155	-0.59427	0.19653	-0.36116	0.976744	0.5	0.389535	1.00581
ENSMUSG00000007029	0.67567	0.88769	0.46878	0.16915	1.20379	1.57109	0.777251	0.720379
ENSMUSG00000007030	0.06159	0.49251	-0.16057	0.06607	0.682353	0.988235	0.529412	0.682353
ENSMUSG00000007033	-0.1326	1.46154	1.15385	-0.21365	0.809524	0.142857	2	0
ENSMUSG00000007034	0.48212	0.70474	0.3045	0.18682	0.8125	0.546875	0.546875	0.640625
ENSMUSG00000007035	0.56315	0.43937	0.56151	0.10089	1.968	0.648	1.12	1.696
ENSMUSG00000007036	0.3909	0.55437	0.36513	0.02557	0.910714	0.830952	0.942857	0.758333
ENSMUSG00000007038	-0.46675	0.10014	-0.12915	0.17411	0.60219	0.70073	0.69708	1.07664
ENSMUSG00000007039	0.82309	0.78948	0.64227	0.64564	1.00468	1.00761	1.84075	1.02927
ENSMUSG00000007041	0.32137	0.37725	0.26142	0.42353	0.933669	0.970764	1.03647	0.891544
ENSMUSG00000007050	0.08673	0.61554	0.18254	0.47727	1.28996	1.71499	1.25106	1.36209
ENSMUSG00000007080	0.07684	-0.48921	-0.56653	-0.60982	1.02943	1.43782	1.33407	0.811626
ENSMUSG00000007097	0.47409	0.1521	0.14986	0.39435	0.52847	0.343416	0.483986	0.300712
ENSMUSG00000007107	-0.52722	0.24252	0.7892	-0.21508	3.03704	0.222222	0.111111	0.62963
ENSMUSG00000007122	0.07453	-0.27902	0.24789	-0.14736	1.55556	1.77778	1.77778	0.888889
ENSMUSG00000007207	-0.07201	0.2349	0.09634	-0.11554	1.10782	1.06739	1.38814	0.897574
ENSMUSG00000007209	6	3	3	2	0.714286	1.71429	0.142857	0.428571
ENSMUSG00000007216	0.69085	0.87954	0.8371	0.88579	1.73239	2.78873	1.67606	1.12676
ENSMUSG00000007279	-0.23265	0.39443	0.05436	0.2177	1.18831	2.63636	1.83117	1.7987
ENSMUSG00000007338	-0.07071	-0.04857	0.10247	-0.01336	0.71964	1.00225	1.1087	0.955772
ENSMUSG00000007379	0.28385	0.6642	1.0077	1.38059	1.20253	1.53797	1.58861	2.23418
ENSMUSG00000007411	0.12365	-0.1278	-0.01268	-0.32292	0.861183	1.08192	1.01723	1.2539
ENSMUSG00000007415	0.05468	-0.21197	-0.12056	-0.24658	0.930243	0.968793	1.11932	1.3061
ENSMUSG00000007440	-0.51828	-0.45833	-0.80023	-0.40989	0.465753	0.849315	1.13699	0.575342
ENSMUSG00000007457	0.22715	-0.17285	0.05431	-0.11028	0.652174	0.717391	1.34783	0.26087
ENSMUSG00000007458	-0.12036	-0.06539	-0.07146	-0.22827	0.701572	0.738318	0.785896	0.797366
ENSMUSG00000007476	0.22714	0.36646	0.09498	0.39584	0.8919	1.09875	1.26075	1.29377
ENSMUSG00000007480	7	3	7	3	0.777778	0.555556	1.11111	0.555556
ENSMUSG00000007564	0.43565	0.74583	0.49184	0.75202	0.757814	0.919009	0.989385	0.912129
ENSMUSG00000007570	-0.66897	0.23806	0.30388	0.10001	1.06	1.2	2.44	2.4
ENSMUSG00000007589	0.13431	0.39402	-0.08357	0.23635	1.13265	0.754694	0.917143	0.981633
ENSMUSG00000007591	3.8	1.8	1.4	0.4	0.709677	0.129032	0.322581	0.935484
ENSMUSG00000007594	0.08579	0.36971	1.18028	1.41576	0.428571	0.428571	0.142857	14.4286
ENSMUSG00000007603	0.12393	0.34179	0.3994	0.06264	1.11111	1.00761	0.873668	0.83105
ENSMUSG00000007610	0.12498	0.24843	-0.09049	-0.17162	1.80247	2.16049	1.46914	1.67901
ENSMUSG00000007613	-0.11708	-0.16857	-0.04641	-0.15813	0.85128	0.973994	1.19748	1.17066
ENSMUSG00000007617	-0.27766	0.09572	-0.08113	-0.83826	0.657097	0.331738	1.14354	0.669856
ENSMUSG00000007646	0.40968	0.69281	0.53069	0.44943	1.11375	1.14431	1.06452	1.26995
ENSMUSG00000007653	-0.41175	-1.37698	-0.93367	-0.2959	1.28	1.32	2.72	0.96
ENSMUSG00000007655	0.16504	-0.24044	0.14224	0.52506	0.722022	0.88231	1.35018	1.05343
ENSMUSG00000007656	-0.12272	-0.12771	-0.04171	-0.25333	0.916599	0.965088	0.968644	1.01471
ENSMUSG00000007659	-0.09311	0.32665	0.10269	0.42686	0.833061	1.31669	1.59656	1.4599
ENSMUSG00000007670	-0.0296	-0.56184	-0.5699	-0.7636	0.909639	1.54036	1.17048	1.74157
ENSMUSG00000007682	-0.18009	-0.81272	-0.50388	-0.8665	1.20339	0.644068	0.661017	2.77966
ENSMUSG00000007721	0.64034	0.76793	0.39884	0.24859	1.11202	0.709699	0.999317	0.883197
ENSMUSG00000007739	0.10372	0.1014	-0.03707	-0.10032	0.967437	1.13554	1.14473	1.40092
ENSMUSG00000007777	-0.18182	-0.37107	-0.07888	-0.41561	0.966808	1.33475	1.28884	1.40466
ENSMUSG00000007783	0.65849	1.00289	0.76327	1.73523	0.901639	1.47213	1.05902	0.918033
ENSMUSG00000007805	0.31846	0.24401	0.12203	0.20597	0.349515	0.31068	0.446602	0.854369
ENSMUSG00000007812	0.20368	0.04398	0.02713	-0.32451	1.25765	1.76228	1.326	1.24676
ENSMUSG00000007815	0.13384	0.19681	-0.04582	0.1767	0.979495	0.84491	0.830614	0.961155
ENSMUSG00000007817	0.07114	-0.03876	-0.05676	-0.00598	1.24454	1.46277	1.21309	1.6457
ENSMUSG00000007827	0.62366	0.6908	0.93419	0.90548	1.21681	0.984656	0.866578	1.32889
ENSMUSG00000007833	0.29984	1.19626	0.77274	-0.25099	1.43874	1.50198	1.09091	1.83399
ENSMUSG00000007836	-0.38325	-0.49627	-0.34802	-0.53535	0.794732	1.28135	0.492893	1.33069
ENSMUSG00000007837	-0.00858	0.24005	0.1073	0.01234	0.583333	1.27667	0.31	0.45
ENSMUSG00000007850	0.37966	-0.01473	0.40473	0.28477	0.851391	0.897341	1.33379	1.20609
ENSMUSG00000007867	0.32705	0.30098	0.1086	-0.1878	1.34404	1.59304	1.44913	1.35341
ENSMUSG00000007872	-0.06536	-0.33399	0.26602	-0.2547	0.684625	0.730092	1.09777	1.39133
ENSMUSG00000007877	11	4	11	2	1.5	13	3	0.5
ENSMUSG00000007880	-0.23381	-0.21967	-0.16238	0.10518	0.872166	1.20529	1.23016	1.12626
ENSMUSG00000007888	-0.20603	0.31546	-0.76341	-0.07427	2.1	0.6	1.55	1
ENSMUSG00000007891	0.23044	0.27607	0.36678	0.29539	1.0477	1.08209	1.19516	0.900245
ENSMUSG00000007892	0.07975	-0.16538	0.03699	0.06199	0.701421	0.890362	0.982921	1.12397
ENSMUSG00000007907	-0.32283	0.571429	0.928571	0.11619	1.32143	1.32143	0.535714	0.428571
ENSMUSG00000007908	0.33636	0.55316	-0.10267	0.06621	1.18062	1.35242	0.92511	0.819383
ENSMUSG00000007944	0	0	0.333333	0.666667	2.85714	1.14286	0	0.714286
ENSMUSG00000007946	0.25	0.3125	0.125	0.125	0.375	0.25	0.25	0.25
ENSMUSG00000007950	0.15369	0.51798	0.24144	0.61511	0.786885	0.737705	0.901639	0.967213
ENSMUSG00000007987	0.04657	0.00756	-0.12926	-0.11467	1.26443	1.10493	1.26338	1.03987
ENSMUSG00000007989	-0.07802	0.35971	0.04615	-0.04631	1.23254	1.71599	2.06296	1.56664
ENSMUSG00000008028	0.28967	-0.51336	-0.18094	0.13931	0.921053	0.315789	0.578947	0.710526
ENSMUSG00000008035	-0.36274	0.32741	-0.12173	-0.1942	0.482446	0.51716	0.519132	0.73215
ENSMUSG00000008036	0.35271	-0.07684	-0.03725	-0.14561	1.27467	1.184	1.19467	1.15067
ENSMUSG00000008090	0.133	-0.19164	-0.07865	-0.26488	0.939535	1.11163	1.30698	1.57209
ENSMUSG00000008129	0.26031	0.58064	0.21816	0.51831	1.1524	1.11273	0.569937	0.741127
ENSMUSG00000008136	0.25666	0.04454	-0.20226	-0.25231	0.955439	0.868938	0.547837	1.06291
ENSMUSG00000008140	0.2766	0.19276	-0.06961	0.075	0.928803	0.705502	1.00971	0.79288
ENSMUSG00000008153	-0.27341	-0.10283	0.02458	-0.12156	2.15116	1.38372	0.0930233	1.46512
ENSMUSG00000008167	0.42867	0.94368	0.70457	1.03212	1.29085	1.20588	2.06209	1.5719
ENSMUSG00000008193	0.375	1.125	1.375	0.375	0.8	0.56	0.28	0.56
ENSMUSG00000008200	-0.44744	-0.32664	-0.37928	-0.2693	1.19348	2.01334	2.10452	1.93699
ENSMUSG00000008206	0.3702	0.42765	0.53388	0.62163	1.14674	1.38047	1.44237	1.14408
ENSMUSG00000008226	-0.04779	-0.15374	-0.40696	0.04303	1.17881	0.994702	0.843709	1.17616
ENSMUSG00000008301	-0.02163	0.07836	0.00732	0.05607	0.854249	1.15192	0.859974	1.28402
ENSMUSG00000008305	-0.16376	-0.57563	-0.06552	-0.79376	0.785612	1.42158	1.10935	1.18849
ENSMUSG00000008307	-0.39908	-0.29386	-0.48028	-0.5586	1.01667	1.43333	1.28333	0.933333
ENSMUSG00000008318	0.17803	0.48871	-0.00107	0.29778	1.67089	0.455696	0.810127	0.582278
ENSMUSG00000008333	-0.10907	-0.44377	-0.07812	-0.59048	0.948899	1.0727	1.12713	1.38097
ENSMUSG00000008348	0.44599	0.80109	0.27487	0.39465	1.60108	2.7391	1.80712	1.61705
ENSMUSG00000008373	0.10638	0.19173	0.12333	0.23285	0.978484	0.824112	0.735997	0.659495
ENSMUSG00000008384	0.50934	0.33436	0.63136	0.72129	1.20106	1.23545	1.12963	1.03439
ENSMUSG00000008393	0.12014	0.14403	0.49193	0.31779	0.923509	1.05474	1.39404	1.47263
ENSMUSG00000008398	0.76389	-0.15679	0.38582	0.32697	0.937313	2.31045	1.55821	0.910448
ENSMUSG00000008429	-0.3734	-0.34278	-0.28866	-0.72792	0.980088	0.925885	1.05088	0.839602
ENSMUSG00000008435	-0.44945	0.07239	0.2343	-0.07544	0.937287	0.896387	0.748466	0.956374
ENSMUSG00000008438	0.75	0.5	1	0.75	1.11765	0.764706	0.941176	0.882353
ENSMUSG00000008450	-0.32659	-0.79721	-0.65621	-0.87714	0.873061	0.789845	2.20733	1.29478
ENSMUSG00000008461	1.16667	0.333333	0.666667	1.16667	4	0.5	1.875	1.5
ENSMUSG00000008475	0.11745	0.04675	-0.02484	-0.05111	1.02792	0.899323	1.15623	1.52002
ENSMUSG00000008482	0.666667	0.333333	3	4.66667	0.333333	0.333333	0.166667	0.833333
ENSMUSG00000008489	0.11332	0.35527	0.03409	0.13801	1.34994	1.41625	1.55798	1.31077
ENSMUSG00000008496	0.25312	0.19902	-0.31113	-0.13763	1.5	0.439024	0.542683	0.664634
ENSMUSG00000008540	-0.35804	-0.14169	-0.24707	-0.54986	1.01045	1.3311	1.55857	1.65845
ENSMUSG00000008575	0.21038	0.00306	-0.07966	-0.16861	0.877786	1.41017	1.4624	1.1257
ENSMUSG00000008590	-0.51261	1.54545	2.27273	-0.20618	1.375	0.75	0.75	1.8125
ENSMUSG00000008601	0.41153	0.47891	0.0593	0.23339	1.50855	1.09402	1.61538	0.448718
ENSMUSG00000008604	0.23655	0.2693	0.62953	0.14051	0.785992	0.919585	0.832685	1.07523
ENSMUSG00000008658	-0.43326	0.05498	-0.56228	-0.33606	0.320346	0.437229	0.744589	1.46753
ENSMUSG00000008668	-0.07309	-0.54479	-0.22323	-0.55271	0.903062	1.09006	0.675476	1.46484
ENSMUSG00000008682	0.07733	-0.08144	0.04853	-0.02822	0.799082	0.751492	0.655394	0.717674
ENSMUSG00000008683	-0.03125	-0.2204	0.09	-0.21045	0.975688	1.14024	0.963291	1.40316
ENSMUSG00000008690	0.05645	0.19475	0.35638	0.15553	0.860457	1.01524	0.900623	0.864958
ENSMUSG00000008730	-0.04018	-0.13749	-0.43456	-0.15129	0.72033	0.918473	1.23323	1.57843
ENSMUSG00000008734	0.15183	-0.242	-0.35512	0.04697	0.583333	0.593137	0.348039	0.343137
ENSMUSG00000008763	-0.39409	-1.01067	-0.78234	-0.34344	0.888262	0.490005	1.02665	1.41927
ENSMUSG00000008789	0.10499	0.08637	-0.13775	1.05892	1.52632	0.578947	0.315789	0.421053
ENSMUSG00000008813	0.666667	1	0.333333	2	0.8	1.2	0.2	0.4
ENSMUSG00000008822	-0.09417	-0.26616	-0.34952	-0.51645	1.25049	1.05088	1.50489	1.18982
ENSMUSG00000008843	-0.9103	-0.87872	-0.81549	-0.88035	0.875	0.625	1	0.875
ENSMUSG00000008845	0.46515	-0.11926	0.71763	-0.07855	0.431034	0.344828	0.586207	0.396552
ENSMUSG00000008855	0.49819	0.55383	0.43911	0.15041	0.703947	0.960526	1.02632	0.483553
ENSMUSG00000008859	0.07674	0.15152	0.24694	-0.40619	0.597984	0.425532	0.492721	2.04479
ENSMUSG00000008874	1	0	1	3	3	0	1	1
ENSMUSG00000008892	-0.02541	-0.08446	-0.13585	-0.34157	1.08439	1.29969	1.33407	1.16468
ENSMUSG00000008932	1	1.5	1.25	0.75	1.13043	0.391304	0.347826	0.652174
ENSMUSG00000008958	0.40418	0.55149	0.37564	0.35317	1.48318	1.20999	1.17023	1.47706
ENSMUSG00000008976	-0.09553	-0.15725	-0.36555	-0.25063	1.02963	1.15763	1.3488	1.20626
ENSMUSG00000008999	0.06163	0.22968	-0.08813	-0.69322	0.96063	1.03937	1.40945	1.28346
ENSMUSG00000009013	-0.07606	-0.08758	-0.07922	-0.57167	1.05552	1.22718	1.2894	1.22552
ENSMUSG00000009030	-0.01227	-0.12698	-0.1325	-0.30556	1.11923	1.92846	2.15923	2.02385
ENSMUSG00000009035	-0.1245	0.47668	0.18371	-0.3195	0.793846	1.24615	1.96923	1.13231
ENSMUSG00000009047	1	0	0	0	0	1	0.5	0
ENSMUSG00000009070	0.8	0.8	2	0.8	1.41176	0.588235	0.352941	0.235294
ENSMUSG00000009073	-0.18397	-0.0123	0.02875	-0.47604	0.871891	0.771144	1.07587	1.15672
ENSMUSG00000009075	0.166667	0.166667	1	0.833333	1	0.5	0.666667	0.25
ENSMUSG00000009076	0.20539	0.30313	0.25155	0.24323	1.10873	0.986217	1.12864	0.93415
ENSMUSG00000009079	0.05651	0.31632	0.2786	0.40382	0.762414	1.18793	0.65679	0.896571
ENSMUSG00000009090	0.4428	0.45242	0.44088	0.57972	0.902466	1.49944	1.09865	1.58296
ENSMUSG00000009092	-0.04684	0.13004	-0.29248	-0.1011	1.33619	0.864303	1.19804	1.23227
ENSMUSG00000009093	1	2	1	1	1.5	0	0	8
ENSMUSG00000009097	0.666667	0.666667	2	1	0.25	0.5	1.25	0.5
ENSMUSG00000009108	0.3666	0.58145	1.04576	0.50904	2.10526	0.526316	1.47368	1
ENSMUSG00000009112	-0.18264	-0.29458	-0.5449	-0.19087	1.3086	1.12985	1.03204	1.56661
ENSMUSG00000009114	0.227273	0.136364	0	0.136364	0.909091	0.363636	0.181818	0.0909091
ENSMUSG00000009115	1	3	2	0	0.6	0.2	0.4	0.2
ENSMUSG00000009145	0.10236	0.05814	0.28398	0.01099	0.787234	1.68085	1.04255	1.31915
ENSMUSG00000009185	4	0	5	1	0	0	0	6
ENSMUSG00000009207	-0.1637	-0.05859	-0.20163	-0.04357	1.1654	1.38547	1.21799	1.50035
ENSMUSG00000009210	6	7	5	1	1.25	1.5	0.75	1.25
ENSMUSG00000009214	0.285714	1.14286	0.357143	0.428571	1.07692	0.692308	0.230769	0.0769231
ENSMUSG00000009216	1	0.3	1.3	0.8	0.7	0.8	2.6	1
ENSMUSG00000009246	-0.04616	0.71095	-0.00251	0.32312	0.946667	1.82667	1.77778	1.11556
ENSMUSG00000009248	0.07943	0.6873	0.87558	0.81293	2.19355	1.3871	2.3871	2.54839
ENSMUSG00000009281	0.25737	-0.2016	-0.03808	-0.27801	1.03048	2.07375	1.67748	1.7119
ENSMUSG00000009291	0.35213	0.47397	0.41792	0.40687	0.905473	0.975539	1.01769	0.937535
ENSMUSG00000009292	0.49226	0.466	1.16676	1.11411	0.541176	0.823529	0.717647	0.8
ENSMUSG00000009293	-0.29007	0.12109	-0.159	0.15201	0.580508	0.873941	0.579449	0.805085
ENSMUSG00000009350	-1.72394	-1.60403	-1.86432	-1.38962	3.5	0.666667	1.16667	1.66667
ENSMUSG00000009356	-0.01851	0.0434783	-0.35639	-0.49038	1.80556	0.0555556	0.611111	0.0555556
ENSMUSG00000009376	-0.09614	-0.30302	-0.66736	-0.12667	1.19149	0.787234	0.914894	0.893617
ENSMUSG00000009378	0.091	0.692308	-0.21776	0.22899	0.954545	2.63636	1.5	0.227273
ENSMUSG00000009394	0.41142	-0.05429	-0.32333	-0.38357	1	0.732394	0.521127	0.464789
ENSMUSG00000009406	0.21377	-0.20142	-0.2966	-0.20274	1.63333	1.55714	1.49524	1.43333
ENSMUSG00000009418	0.55489	0.78024	0.35992	0.3957	0.478304	0.843195	0.949704	0.454142
ENSMUSG00000009470	-0.33203	-0.23067	-0.09287	-0.42104	1.13503	1.53653	1.46407	1.30749
ENSMUSG00000009471	-0.0904	1.18202	1.61397	1.33687	1.55556	0.444444	0.777778	2.33333
ENSMUSG00000009487	-0.23059	0.11628	-0.22442	-0.0117	1.06061	0.909091	1.66667	0.545455
ENSMUSG00000009535	0.11126	0.40852	0.47053	0.29715	1.01868	1.01185	1.14852	1.10843
ENSMUSG00000009545	0.37951	-0.17674	-0.77341	0.35748	1.41077	0.599327	1.63636	1.84848
ENSMUSG00000009549	0.07757	0.02713	0.03106	-0.33675	1.15981	1.36052	1.34113	1.16714
ENSMUSG00000009551	0.333333	1.16667	1	1	0.7	1.1	0.9	1.4
ENSMUSG00000009555	0.01981	0.90908	0.33266	0.20723	0.888124	1	1.61274	1.60929
ENSMUSG00000009563	0.44648	0.57855	0.43734	0.57305	0.321951	0.653659	0.401626	0.918699
ENSMUSG00000009566	-0.81054	-0.99069	-0.22026	0.18555	0.996988	1.12952	0.879518	1.08133
ENSMUSG00000009569	0.25838	0.385	0.22995	0.51842	1.31586	1.67493	1.38173	1.43555
ENSMUSG00000009575	-0.15427	-0.10762	-0.34971	-0.21276	0.954523	1.02007	1.01165	1.0424
ENSMUSG00000009580	1	1.2	0.8	0.2	1.14286	1	0.857143	0.571429
ENSMUSG00000009585	-0.03645	-0.34698	0.28344	0.24781	0.673423	0.940315	0.713964	1.21622
ENSMUSG00000009588	1.2	1.4	0.8	0.8	0.714286	0.857143	0.714286	0
ENSMUSG00000009596	-0.11079	-0.08202	-0.3175	-0.34688	0.660714	0.9375	0.901786	0.0446429
ENSMUSG00000009614	0.13904	0.52146	0.48295	0.58704	1.03448	1.05665	0.997537	0.901478
ENSMUSG00000009621	-0.46236	0.19297	0.66046	0.69941	0.923875	0.99308	1.43599	0.723183
ENSMUSG00000009628	0.50077	0.52855	-0.25874	-0.21106	1.19813	1.08159	1.64502	1.03917
ENSMUSG00000009630	0.42342	-0.34583	-0.21462	-0.56637	1.03621	0.825862	1.30517	1.45862
ENSMUSG00000009633	0.3719	-0.0857	-0.04667	-0.02424	1.35345	1.68966	1.2069	1.00862
ENSMUSG00000009640	0.14443	0.34135	0.04382	0.02979	1.1151	0.961823	0.956125	0.825641
ENSMUSG00000009646	0.5	0	0.5	0.5	0.6	0.3	0.6	0.8
ENSMUSG00000009647	0.21383	-0.11295	0.00395	0.15096	1.26174	1.65996	1.57718	1.33557
ENSMUSG00000009654	-0.19749	0.21107	0.30825	0.40562	0.324675	0.116883	0.545455	1.24675
ENSMUSG00000009670	-0.11539	0.10469	-0.09128	-0.29158	1.1803	0.838636	0.950758	0.584848
ENSMUSG00000009681	-0.12839	-0.12528	-0.08645	0.28044	0.865789	0.825	1.01579	0.784211
ENSMUSG00000009687	0.15982	-0.44416	-0.30964	-0.12328	1.95238	1.86905	0.738095	1.60714
ENSMUSG00000009731	0.44385	0.22106	0.99396	0.67252	0.87037	0.805556	0.861111	0.842593
ENSMUSG00000009733	-0.43505	-0.99011	-0.34979	-0.2956	0.756381	0.838166	0.825178	2.28599
ENSMUSG00000009734	-0.74516	-0.85208	-0.95893	-0.51343	1.71429	1.60714	1.03571	1
ENSMUSG00000009739	0.33809	-0.27969	-0.29119	-0.07879	1.53448	1.15517	1.44828	1.13218
ENSMUSG00000009741	0.0023	-0.01267	0.11247	0.06036	0.730715	1.21599	1.39762	1.2237
ENSMUSG00000009772	-0.24493	-0.25427	-0.15243	0.18832	0.645161	1.03226	1.3871	0.419355
ENSMUSG00000009828	0.33421	0.54	0.89189	0.80007	0.926372	1.0415	1.68809	1.23159
ENSMUSG00000009863	0.22613	0.00765	0.12788	-0.17607	0.928018	1.13235	1.02551	1.00934
ENSMUSG00000009876	0.83527	0.88152	0.64566	0.64714	1.03953	1.57692	1.02991	0.441239
ENSMUSG00000009894	0.03324	0.22093	-0.00968	0.05338	1.18771	1.37002	1.37334	1.16321
ENSMUSG00000009900	3	0.5	2.5	1	2.28571	0.857143	0.142857	1.28571
ENSMUSG00000009905	0.19674	-0.17095	0.6118	0.19526	0.771641	0.739373	0.99969	0.803289
ENSMUSG00000009907	-0.03314	-0.01653	0.11087	0.11893	0.777345	1.10613	1.03992	1.06556
ENSMUSG00000009927	-0.20461	-0.24219	0.00212	-0.32267	1.01197	1.19621	0.852561	1.74594
ENSMUSG00000009941	0.3836	0.27909	0.4174	0.34217	0.601227	0.779141	0.687117	0.411043
ENSMUSG00000009995	0.17656	0.125	-0.10608	-0.00209	1.15401	1.12473	1.57375	1.27874
ENSMUSG00000010021	11	1.5	1.5	2.5	2.91667	0.75	1.5	0.333333
ENSMUSG00000010025	-0.0534	0.22847	0.42936	0.23421	0.944346	0.898757	1.4405	1.04322
ENSMUSG00000010044	1	0.4	0.2	3.2	0.162162	1.94595	0.351351	0.621622
ENSMUSG00000010045	0.60401	0.68242	0.44835	0.40305	0.960563	0.880282	0.923944	0.983099
ENSMUSG00000010047	0.64406	0.7384	1.02891	0.95215	1.17793	1.56715	1.77759	1.18905
ENSMUSG00000010048	-0.0142	0.37192	0.04967	-0.06481	0.918295	0.548845	1.03908	1.12966
ENSMUSG00000010051	0.33652	-0.0949	1.36374	0.94539	0.484536	0.628866	0.498282	0.532646
ENSMUSG00000010054	0.17511	0.96841	0.36396	-0.25498	0.273486	0.398747	0.722338	1.06054
ENSMUSG00000010057	0.34856	0.62092	0.52519	0.46386	1.0611	1.18769	1.02769	0.995165
ENSMUSG00000010064	0.02044	-0.16339	-0.26836	0.01212	1.2	0.745455	0.145455	1.98182
ENSMUSG00000010066	0.70433	0.13884	0.34125	0.71803	5.9901	7.40594	2.54455	2.0495
ENSMUSG00000010067	0.28872	0.48564	0.46723	0.57648	1.12043	1.18064	1.53129	1.44156
ENSMUSG00000010080	-0.3765	0.33685	0.09361	0.4672	1.23729	1.0339	0.525424	0.966102
ENSMUSG00000010086	1.25	0.625	0.75	1	0.545455	0.318182	0.318182	0.454545
ENSMUSG00000010095	0.30106	0.36155	0.23861	0.34221	0.852681	0.705828	1.15944	1.51329
ENSMUSG00000010097	0.09155	0.24615	0.14888	-0.07002	1.07958	1.06937	0.845833	0.916458
ENSMUSG00000010110	0.02978	0.56497	0.4108	0.26035	1.08258	1.17584	1.37346	0.890715
ENSMUSG00000010122	-0.15728	0.58675	-0.91075	0.77669	1.01587	0.0793651	0.0952381	0.111111
ENSMUSG00000010136	1	2	3	1	0.5	7.25	1.75	1
ENSMUSG00000010142	-0.75376	0.06566	-0.09371	0.01525	0.64	0.8	0.28	0.68
ENSMUSG00000010154	0.23182	0.4195	0.07303	0.07304	1.08333	0.533333	0.916667	0.55
ENSMUSG00000010175	0.4712	0.33427	-0.04376	0.15525	1.05273	1.06909	0.810909	0.952727
ENSMUSG00000010205	0.04945	-0.17124	-0.2069	0.01843	1.01306	0.906716	1	1.2556
ENSMUSG00000010277	0.26262	0.24167	0.19765	0.16714	0.873662	0.779082	0.97273	0.731446
ENSMUSG00000010290	-0.19557	-0.00769	0.40395	0.16151	0.835232	1.11569	1.40316	1.45574
ENSMUSG00000010307	0.40361	0.34009	0.10258	0.28634	1.1347	0.776985	1.1008	1.16414
ENSMUSG00000010311	1	1	1	1.42857	1.44444	0.888889	0.555556	0.444444
ENSMUSG00000010342	-0.01293	0.0581	-0.04564	-0.2802	1.2587	1.52791	1.81484	1.47669
ENSMUSG00000010358	0.1428	-0.22002	-0.15601	0.41201	0.932292	1.28646	1.08854	1.09375
ENSMUSG00000010362	0.2669	0.29514	0.36885	0.41848	1.51646	1.56153	1.32062	0.942808
ENSMUSG00000010376	0.08049	-0.15442	0.01783	-0.14511	1.00929	1.14758	1.05657	1.00437
ENSMUSG00000010392	0.4999	0.23344	0.35866	0.46329	1.07326	1.05296	1.67079	1.3248
ENSMUSG00000010406	0.20514	-0.22364	-0.02988	-0.2707	1.33594	0.975724	0.873923	1.75646
ENSMUSG00000010435	2	0.5	1.5	0.5	0.714286	0.714286	0.571429	0
ENSMUSG00000010453	0.68794	0.79275	0.88185	0.77804	0.514696	0.720107	0.59352	1.42218
ENSMUSG00000010461	-0.62324	-1.38456	-0.00619	-0.75619	1.23077	1.20067	1.33779	0.856187
ENSMUSG00000010476	0.73118	0.20088	0.53767	0.51121	0.731343	0.791045	0.552239	0.522388
ENSMUSG00000010492	0.12261	0.06035	0.10564	0.2558	0.839844	1.17578	0.988281	1.1875
ENSMUSG00000010505	-0.67933	-0.32605	-0.42976	-0.3313	0.985915	1.12676	0.521127	0.492958
ENSMUSG00000010517	0.53129	0.97576	-0.09952	0.34269	1.1381	1.28977	1.56473	1.2984
ENSMUSG00000010529	0.03926	0.46694	0.55729	-0.19863	0.45	0.3	0.6	1.25
ENSMUSG00000010538	0.15708	-0.02993	0.2113	-0.15122	0.794922	0.884766	0.970703	1.03906
ENSMUSG00000010554	0.13407	0.0705	0.328	0.08901	0.703942	0.771521	0.777957	0.705551
ENSMUSG00000010592	-0.05292	-0.13862	-0.28577	-0.35618	1.26595	1.48976	1.2679	0.787707
ENSMUSG00000010601	0.368421	0.0526316	0.631579	0.0526316	1.66667	0.25	0.666667	0.75
ENSMUSG00000010607	0.22191	0.1694	0.25631	-0.04081	0.927039	0.940629	1.25536	0.839056
ENSMUSG00000010608	-0.10134	-0.00767	0.10956	0.17096	1.1719	1.44849	1.52911	1.65676
ENSMUSG00000010609	0.62331	0.8059	0.71517	0.6966	1.07908	1.14355	0.527981	1.3601
ENSMUSG00000010651	0.01922	-0.38314	-0.54161	-0.19115	0.641509	0.396226	1.23585	0.216981
ENSMUSG00000010660	0.34036	0.35164	0.35425	0.55863	1.04909	0.701818	0.878182	1.37455
ENSMUSG00000010663	-0.02367	0.08426	0.0009	0.09253	0.806009	0.856956	1.08883	1.30895
ENSMUSG00000010721	-0.10548	0.41899	-0.02263	0.04338	0.861919	0.938227	1.16497	0.550872
ENSMUSG00000010751	0.7076	0.57412	0.2349	0.84209	0.477987	0.465409	0.761006	0.811321
ENSMUSG00000010755	0.22255	0.733	0.30007	0.47444	1.0864	0.99407	0.596357	0.594663
ENSMUSG00000010760	0.5	0.666667	0.666667	0.333333	4	2	5	7
ENSMUSG00000010796	-0.05933	-0.38758	-0.23617	-0.32594	0.970234	0.76258	0.759036	0.607371
ENSMUSG00000010797	0.06032	-0.05357	-0.20306	0.24789	2.25	2.6875	1.6875	0.75
ENSMUSG00000010803	0.06849	0.04528	0.05385	0.40663	1.48889	0.555556	4.51111	0.688889
ENSMUSG00000010825	-0.67317	-0.73977	-0.41755	-0.74252	1.09091	0.727273	1.40909	0.863636
ENSMUSG00000010830	0.26876	0.02325	-0.0457	0.09656	0.602015	0.855164	0.861461	1.02267
ENSMUSG00000010841	0.75	0.625	1	1.25	2.25	3	2.5	2.25
ENSMUSG00000010911	-0.22424	-0.40616	-0.41412	-0.26495	1.06012	1.07052	1.16879	1.31908
ENSMUSG00000010914	0.0194	0.20061	0.56191	0.42221	0.864727	1.03127	0.888727	1.11127
ENSMUSG00000010936	0.05412	0.39644	0.05607	-0.41335	0.84965	1.31119	1.17249	0.870629
ENSMUSG00000011008	1.5	0.333333	2.83333	1	4.33333	6.66667	4	3.66667
ENSMUSG00000011034	0.85231	0.222222	-0.14234	0.04199	0.605263	0.368421	0.263158	0.526316
ENSMUSG00000011052	0	0	0	0	2	1	1	4
ENSMUSG00000011096	-0.02616	0.72386	-0.03364	0.20793	0.884106	0.268212	1.23841	0.281457
ENSMUSG00000011114	0.00548	0.07473	0.16821	0.02692	1.01429	1.15277	1.06625	1.14523
ENSMUSG00000011118	0.625	0.25	0.875	1.75	0.866667	0.333333	1.53333	0.866667
ENSMUSG00000011148	-0.05293	-0.36687	-0.22491	-0.10653	0.777778	1.94444	0.611111	2.72222
ENSMUSG00000011154	-0.24376	-0.0843	-0.40873	0.16995	0.6	1.48	0.88	2.16
ENSMUSG00000011158	-0.44962	-0.36092	0.06813	0.15218	0.753873	0.989673	1.04647	0.719449
ENSMUSG00000011171	-1.05629	-0.60038	-0.65596	0.41395	1.11111	0.435897	0.205128	0.82906
ENSMUSG00000011179	-0.11962	-0.29758	-0.27869	-0.39279	0.856137	1.25553	1	1.06942
ENSMUSG00000011254	-0.10596	-0.13959	-0.15323	0.25429	0.515439	0.491686	0.765637	0.722882
ENSMUSG00000011256	-0.15585	0.04913	0.22851	-0.08624	1.27513	1.27337	0.604938	0.964727
ENSMUSG00000011257	0.2544	-0.04389	-0.01649	0.2871	0.943955	0.886965	0.922544	1.18451
ENSMUSG00000011263	-0.03692	-0.20502	0.44255	-0.41262	1.28571	0.15873	0.460317	0.68254
ENSMUSG00000011267	-0.3903	0.10737	0.2232	0.40881	1.43802	1.93388	2.57851	2.58678
ENSMUSG00000011305	0.24329	0.07398	-0.19798	-0.5328	1	0.0714286	0.142857	1.25
ENSMUSG00000011306	0.0283	0.09639	0.13829	-0.03305	1.21764	1.90221	1.46405	1.21189
ENSMUSG00000011349	0.2	0.2	0.6	0.2	2	0.285714	0.285714	0.428571
ENSMUSG00000011350	2.5	0.5	1.5	0.5	1.375	0.875	1.375	1.125
ENSMUSG00000011382	-0.03493	-0.10214	0.33643	0.19134	0.849328	1.05566	0.894434	0.984645
ENSMUSG00000011427	-0.55378	0.18196	-0.19807	-0.35507	0.911439	0.605166	1.20664	0.802583
ENSMUSG00000011463	-0.06637	0.33518	0.31193	0.30447	0.482759	0.327586	0.706897	1.86207
ENSMUSG00000011486	9	4	3	7	0.75	0.875	0.125	0.625
ENSMUSG00000011589	0.28319	0.52121	0.16112	-0.0022	0.694915	0.949153	0.855932	0.635593
ENSMUSG00000011632	-0.01606	0.04037	-0.03219	-0.2476	0.902422	1.08903	1.01567	0.747151
ENSMUSG00000011658	0.60879	0.23582	0.59086	0.07198	1.41558	0.577922	0.694805	1.25974
ENSMUSG00000011751	-0.25399	-0.52467	0.0669	0.09702	1.60606	0.212121	0.484848	0.666667
ENSMUSG00000011752	-0.01609	-0.29801	-0.42504	-0.50414	0.944983	0.838062	1.01765	1.25294
ENSMUSG00000011831	0.02786	-0.04007	0.05305	-0.5376	1.02715	1.15425	1.2201	1.00058
ENSMUSG00000011832	0.57567	0.74004	0.1246	0.41283	1.29412	1.45588	1.48039	0.906863
ENSMUSG00000011837	0.16647	0.07675	0.20305	-0.17183	0.740594	0.70297	1.08911	0.992079
ENSMUSG00000011877	0.64519	0.34165	0.41654	0.64092	0.754508	1.03467	0.680999	0.510402
ENSMUSG00000011884	0.30373	0.37691	0.0793	0.35822	1.40157	0.909449	1.3622	1.58268
ENSMUSG00000011958	0.21684	0.21388	0.35305	0.19092	0.879581	1.29993	1.40987	1.59611
ENSMUSG00000011960	0.12167	0.47279	0.38455	0.27282	0.938808	1.24799	1.21739	1.13607
ENSMUSG00000012017	-0.14031	-0.13862	-0.45271	-0.59377	0.9375	0.78125	1.40625	1.46875
ENSMUSG00000012042	1.125	2.875	0.375	0.25	1.36364	0.727273	1.27273	1.18182
ENSMUSG00000012076	-0.48233	-0.87982	-0.45108	-0.95123	0.810847	1.30556	1.80688	1.58201
ENSMUSG00000012114	0.37438	0.30058	0.61492	0.42609	1.01495	1.54335	1.15172	0.844544
ENSMUSG00000012117	0.14064	0.25652	0.20905	-0.06655	0.99501	0.837325	1.09681	0.681637
ENSMUSG00000012123	0.85687	0.1194	0.49785	0.5137	1.09756	1.56098	1.58537	0.902439
ENSMUSG00000012126	0.72078	0.54779	0.39597	0.7946	0.994709	1.08466	0.656085	1.09524
ENSMUSG00000012187	1.71429	1.57143	1	0.428571	5.4	1.2	1.8	3.8
ENSMUSG00000012211	0.875	1.5	0.25	0.25	0.444444	0.444444	0.555556	0.777778
ENSMUSG00000012282	0.444444	0.666667	0.666667	2	0.75	0.5	0	0.416667
ENSMUSG00000012296	0.3723	0.7309	0.76026	1.13334	0.309623	0.873082	0.529986	0.895397
ENSMUSG00000012350	-0.80722	-0.40967	0.20714	-0.77883	0.575342	2.09589	4.15068	0.452055
ENSMUSG00000012396	0.10111	-0.02718	0.25425	-0.36718	0.586957	1.28261	0.73913	2.43478
ENSMUSG00000012405	0.21291	-0.12898	0.10205	-0.07139	1.22183	1.61824	0.809398	1.93907
ENSMUSG00000012422	-0.17886	-0.47025	-0.29536	-0.12809	1.01329	1.50332	1.60672	1.79874
ENSMUSG00000012428	-0.0487	-0.34057	-1.17079	-0.76441	2.08943	1.9065	1.68293	2.51626
ENSMUSG00000012429	0.01445	-0.41022	-0.2846	-0.36462	1.06034	1.81609	1.09195	1.25575
ENSMUSG00000012443	-0.273	-0.4096	-0.22855	-0.27227	0.864793	1.53079	1.31727	1.34538
ENSMUSG00000012483	-0.21317	-0.6668	-0.29281	-0.40964	1.16966	1.38858	1.33776	1.24785
ENSMUSG00000012519	-0.6769	-0.60709	-0.44752	0.09561	1.06612	1.12397	0.818182	1.43388
ENSMUSG00000012520	1.22222	0.555556	0.777778	1.11111	0.766667	0.333333	0.366667	0.433333
ENSMUSG00000012535	-0.0734	0.21055	0.10403	0.40995	1.00244	1.10989	1.33252	1.26821
ENSMUSG00000012609	0.19321	0.33921	0.12537	0.17301	0.967136	0.983099	0.833803	0.868545
ENSMUSG00000012640	0.11669	-0.09193	0.16944	0.11336	1.1533	1.40444	1.14675	0.849723
ENSMUSG00000012705	0.03412	0.22485	0.72427	0.14105	1.64706	1.05882	0.647059	1.64706
ENSMUSG00000012777	-0.01418	1.06923	1.34283	1.50948	1.4	0.97037	2.8963	1.54815
ENSMUSG00000012819	0.20124	0.2195	0.15875	-0.00787	0.788618	0.495935	1.27642	0.829268
ENSMUSG00000012848	0.05486	-0.17461	0.1024	-0.28619	0.994772	1.17179	1.2309	1.11082
ENSMUSG00000012889	-0.42926	0.157895	-0.21029	-0.22164	1.26667	2	2	1.06667
ENSMUSG00000013033	0.08356	-0.05915	-0.12498	-0.0426	0.905089	1.02687	1.08119	1.12864
ENSMUSG00000013076	0.06354	-0.19184	-0.02774	-0.16846	0.885275	1.27698	1.06612	1.21909
ENSMUSG00000013083	0.30596	-0.6505	0.05904	0.19656	1.78049	2.14634	2.17073	0.853659
ENSMUSG00000013089	0.09664	0.40751	-0.18563	0.53264	0.780793	1.23591	1.91232	0.382046
ENSMUSG00000013091	0.5	1	1	0	1.33333	2.66667	2.33333	0
ENSMUSG00000013150	-0.37694	0.3471	0.87799	0.79436	1.13277	0.799435	0.943503	0.830508
ENSMUSG00000013155	-0.24393	0.13379	-0.02538	-0.1285	1.07345	0.892655	0.943503	1.14124
ENSMUSG00000013158	-0.32777	-0.22453	-0.27627	-0.25349	1.16129	1.80645	1.83871	1.41935
ENSMUSG00000013160	0.12404	0.07574	0.11452	-0.19707	1.05259	1.2144	1.10922	0.985437
ENSMUSG00000013236	0.44564	0.57275	-0.00201	-0.13479	1.39392	1.52541	1.55028	1.08674
ENSMUSG00000013275	0.43818	0.12964	0.55654	0.02006	1.71861	0.601732	1.90043	0.963925
ENSMUSG00000013338	0.363636	0.909091	0.818182	2.27273	0.425	1.675	0.7	0.275
ENSMUSG00000013353	-0.80933	-0.38527	-0.16898	0.17973	1.08	0.8	2.44	0.88
ENSMUSG00000013367	0.333333	0.25	0.416667	0.0833333	1.4	0.4	0.333333	1.73333
ENSMUSG00000013415	0.13313	-0.23474	-0.43583	-0.05326	0.829493	0.751152	0.230415	0.529954
ENSMUSG00000013418	0.46912	0.60361	0.56991	0.77241	0.761905	1.66667	2	1.42857
ENSMUSG00000013419	0.61013	0.26603	0.1405	0.24044	0.655052	1.27178	0.519164	1.20906
ENSMUSG00000013465	-0.18045	0.17661	-0.18389	-0.17453	0.881773	1.09458	0.836453	0.659113
ENSMUSG00000013483	-0.57419	-1.03525	-0.79004	-0.94175	1.85294	0.470588	1.08824	0.117647
ENSMUSG00000013495	0.32283	0.12994	0.07377	0.06727	1.28146	1.4058	1.78719	1.45004
ENSMUSG00000013523	0.34836	-0.08597	-0.28677	0.31116	0.697479	0.420168	0.302521	0.806723
ENSMUSG00000013539	0.25674	0.12739	0.25049	0.95066	0.903727	1.66149	0.931677	1.2236
ENSMUSG00000013562	0.416667	0.5	0.5	0.25	0.6875	0.5	0.1875	1.625
ENSMUSG00000013584	-0.1241	0.29872	-0.23437	-0.11622	0.78944	0.703562	0.79771	0.746183
ENSMUSG00000013593	0.01115	0.30769	0.01251	-0.15128	0.919643	0.862723	1.13058	0.931548
ENSMUSG00000013611	0.77877	0.25417	0.91069	0.58206	0.746914	0.765432	1.2284	0.95679
ENSMUSG00000013622	0.1315	0.03764	0.22748	0.0539	0.851836	1.1054	1.04881	1.05702
ENSMUSG00000013629	0.64303	0.65625	1.10917	0.70991	0.756926	1.2538	0.765862	0.411081
ENSMUSG00000013643	0.5	2	1.5	2.5	0.615385	0.307692	0.307692	0.230769
ENSMUSG00000013646	0.34429	0.0459	0.23192	-0.89138	0.564565	0.483483	0.60961	0.237237
ENSMUSG00000013653	0.36307	-0.44467	-0.14158	-0.00961	0.793103	0.172414	2.13793	1
ENSMUSG00000013662	-0.01771	-0.10598	-0.06805	0.09012	0.755258	0.877976	1.00971	1.02588
ENSMUSG00000013663	0.19644	-0.39052	-0.07661	-0.35407	0.912903	1.29032	0.825806	1.74919
ENSMUSG00000013668	1.5	0.5	1	0	0.875	0.625	0.25	0.25
ENSMUSG00000013698	0.38344	0.17623	0.05407	0.21064	1.14518	1.20093	1.05575	1.06039
ENSMUSG00000013701	0.03982	-0.16912	0.04413	-0.22976	0.843561	0.919318	1.05758	0.770076
ENSMUSG00000013707	-0.00283	0.4527	0.32745	0.1134	1.32143	1.10714	0.678571	0.571429
ENSMUSG00000013736	-0.22014	-0.28305	0.03367	-0.18726	0.82185	0.979687	1.04831	0.850947
ENSMUSG00000013766	0.12359	0.57144	0.27695	0.20953	0.952421	2.40102	3.3288	2.34834
ENSMUSG00000013787	0.44441	0.28598	0.2486	0.02645	1.02027	0.913288	0.891892	0.993243
ENSMUSG00000013822	0.08321	-0.05692	0.16	0.04888	1.16667	1.21748	1.10298	1.4397
ENSMUSG00000013833	-0.17428	0.13764	0.2727	0.53735	1.2662	1.62963	0.752315	1.09259
ENSMUSG00000013846	-0.40257	0.39058	0.03953	0.16766	0.746269	0.485075	0.432836	0.776119
ENSMUSG00000013858	0.5058	0.44496	0.23443	-0.14167	0.543624	0.375839	0.281879	0.57047
ENSMUSG00000013878	0.3452	0.0736	0.26814	0.33323	0.950091	1.11199	1.54778	1.27389
ENSMUSG00000013921	-0.02456	0.24766	0.53557	0.40169	0.80597	0.634328	1.26866	0.720149
ENSMUSG00000013928	-0.26534	-0.21797	-0.58319	-0.26602	2	1.88462	1.5	1.19231
ENSMUSG00000013936	3	1	8	10.5	3	0.4	0.4	0.6
ENSMUSG00000013973	0.2616	0.45393	0.62393	0.22825	0.786204	0.677591	0.717226	0.469893
ENSMUSG00000013974	-0.24681	-0.33253	0.03173	-0.54481	1.6	2.3	4	4.7
ENSMUSG00000013997	0.02656	0.42133	0.22592	0.33643	1.07095	1.0214	0.902027	0.842342
ENSMUSG00000014030	-0.66925	0.1976	-1.20889	0.11409	6.64706	6.64706	1.11765	0.941176
ENSMUSG00000014039	0.25891	0.29246	0.22957	-0.21565	0.836625	1.85099	0.834829	0.552962
ENSMUSG00000014074	-0.39432	-0.41507	-0.55691	-0.43806	1.04928	1.02464	1.15652	1.13696
ENSMUSG00000014075	-0.18772	-0.59559	-0.41355	-0.54583	1.09343	1.21684	1.27566	1.57901
ENSMUSG00000014077	-0.00617	0.13258	0.17197	0.21051	0.931479	1.02988	1.09531	1.02576
ENSMUSG00000014104	1	2	1	4	2.8	0.6	1.2	1.6
ENSMUSG00000014158	0.19864	-0.2799	-0.38315	-0.39337	0.833333	0.444444	2.5	0.444444
ENSMUSG00000014164	-0.25182	-0.70743	-0.33148	0.08853	1.64072	1.29341	1.4491	1.56886
ENSMUSG00000014177	-0.22986	-0.16079	-0.11868	-0.437	1.01958	0.853141	1.09709	0.76285
ENSMUSG00000014195	-0.06816	0.32893	0.291	-0.00925	1.09035	1.32783	1.43056	0.905524
ENSMUSG00000014198	2.25	1	2.25	1.5	0.727273	0.363636	0.454545	0.5
ENSMUSG00000014226	0.05927	-0.16842	-0.07371	-0.07652	1.13156	1.15109	1.25482	1.39736
ENSMUSG00000014232	-0.05102	0.06677	0.04131	0.00193	1.02834	1.39919	1.42348	1.1919
ENSMUSG00000014243	-0.05998	-0.14416	-0.12164	-0.37206	0.947429	0.893714	1.00114	1.04114
ENSMUSG00000014245	-0.16106	0.30777	0.19137	0.07778	1.21926	1.09016	1.23156	0.618852
ENSMUSG00000014294	0.0396	-0.12042	0.0661	-0.26297	1.0546	1.035	0.919272	1.16099
ENSMUSG00000014301	0.08461	-0.28551	-0.49166	-0.44359	1.07229	3.34137	3.75502	3.41365
ENSMUSG00000014303	0.06164	0.03155	-0.04093	-0.0203	0.923232	1.32929	1.48485	1.33131
ENSMUSG00000014313	-0.14871	-0.44863	-0.25764	-0.62937	1.00213	1.2943	1.32124	1.32321
ENSMUSG00000014329	0.32012	0.10827	-0.03063	-0.27252	0.738596	1.02807	0.635965	1.27193
ENSMUSG00000014349	-0.07535	0.20891	-0.22639	-0.15434	0.911017	1.09322	1.02542	0.861229
ENSMUSG00000014351	1	0	3	1	5	4	2	0
ENSMUSG00000014353	0.06136	-0.00807	0.0628	-0.03582	1.25181	1.06753	1.4877	1.49349
ENSMUSG00000014355	0.42467	0.38443	0.38399	0.07581	1.01064	1.08759	1.4617	1.00177
ENSMUSG00000014361	0.19913	0.65698	0.64138	0.57557	0.845438	1.48045	1.53445	0.960894
ENSMUSG00000014402	0.01905	0.16763	0.12288	-0.03076	0.965569	1.30689	1.42914	1.11452
ENSMUSG00000014418	-0.10891	0.43065	0.24017	0.3181	0.840625	0.742708	0.910417	1.16562
ENSMUSG00000014426	0.28002	0.40576	0.257	0.30657	1.12352	1.21146	1.14625	1.23617
ENSMUSG00000014444	0.03593	-0.01672	0.08671	-0.80899	3.83824	7.05882	2.75	2.57353
ENSMUSG00000014453	0.333333	1.16667	0.666667	0.666667	0.619048	0.190476	0.666667	0.285714
ENSMUSG00000014470	0.46297	0.16264	0.48355	0.32008	1.64091	0.877273	1.16818	1.82273
ENSMUSG00000014496	-0.23317	-0.21775	-0.16184	0.16417	1.50713	1.90143	1.31647	1.92348
ENSMUSG00000014498	-0.36252	0.02397	-0.29035	-0.48538	0.718905	1.19154	1.17413	1.199
ENSMUSG00000014503	-0.17596	-0.35057	-0.15049	0.02905	0.740786	1.0731	1.38465	1.72511
ENSMUSG00000014504	-0.20234	-0.26238	-0.17738	-0.32417	0.797516	0.848447	0.986335	1.40311
ENSMUSG00000014529	0.571429	0.285714	0.857143	0.714286	0.666667	0.466667	0.2	0.466667
ENSMUSG00000014542	4	10	2	2	0.833333	1.66667	0.666667	0.833333
ENSMUSG00000014543	0.4	1.4	1.2	1.4	1.4	2.1	1.3	1.1
ENSMUSG00000014547	-0.21112	-0.21305	0.0362	-0.34378	1.10745	0.758242	1.52747	1.05983
ENSMUSG00000014550	0.2112	0.57802	0.49753	0.20869	0.908711	1.04042	0.554007	0.912195
ENSMUSG00000014551	-0.10735	-0.39095	-0.22433	-0.31842	1.18552	1.319	1.19306	1.34917
ENSMUSG00000014554	-0.00508	0.20246	-0.08489	-0.10989	0.965823	1.05063	1.51013	1.12785
ENSMUSG00000014592	-0.04143	0.23452	-0.20945	0.02623	0.861621	1.12819	0.971203	0.831804
ENSMUSG00000014599	0.43021	0.57243	0.52621	0.70726	0.573171	1.08537	0.878049	2.31707
ENSMUSG00000014601	-0.38444	0.43135	-0.38797	0.35228	0.756757	0.921493	1.00257	0.918919
ENSMUSG00000014602	0.16296	0.40577	0.67194	-0.48392	0.775701	0.934579	0.943925	0.853583
ENSMUSG00000014603	1	1	0.333333	0.333333	0.8	0.8	0.2	0.8
ENSMUSG00000014606	0.11949	0.51438	0.3171	0.34927	0.905446	1.10652	1.34411	1.01077
ENSMUSG00000014609	1.25	1.5	0.25	0.75	0.8	0.4	3.4	0.4
ENSMUSG00000014633	0.27566	0.39087	0.2495	0.08189	1.03568	0.860441	1.18363	0.983211
ENSMUSG00000014668	0.19425	0.7098	0.528	0.65301	0.882907	0.810229	0.701884	0.619112
ENSMUSG00000014686	0.2	0	0	0.4	1.5	0	0	0.5
ENSMUSG00000014704	-0.4881	-0.62076	-0.03347	-0.22892	0.30303	0.0606061	0.242424	0.666667
ENSMUSG00000014725	-0.39622	-0.69668	-0.31604	-0.50974	1.15517	0.775862	0.586207	0.62069
ENSMUSG00000014747	4	2	4	5	2.83333	1.16667	2.16667	0.5
ENSMUSG00000014748	0.25736	0.69761	0.67345	0.78349	0.753086	1.19852	0.841975	0.74963
ENSMUSG00000014763	-0.2775	0.21274	-0.0388	-0.57208	0.933504	1.11317	1.0991	0.945652
ENSMUSG00000014767	0.35979	0.22648	0.42531	0.33459	1.11818	1.29587	1.32975	1.39421
ENSMUSG00000014769	0.03254	-0.21781	0.05405	-0.21495	0.949137	1.2854	1.22214	1.25432
ENSMUSG00000014771	0.18467	-0.45879	-0.09743	-0.18636	1.22594	1.33891	1.00837	1.79498
ENSMUSG00000014773	0.16467	-0.41925	-0.41536	-0.76493	0.4	2.4	1.88	2.68
ENSMUSG00000014776	-0.22241	-0.27199	-0.49396	-0.28014	0.814815	0.37037	0.148148	0.518519
ENSMUSG00000014778	0.12439	0.03064	0.60367	0.66558	0.605839	0.481752	0.686131	0.744526
ENSMUSG00000014782	-0.04174	0.56015	1.14035	1.51806	0.833333	0.15	0.283333	0.983333
ENSMUSG00000014786	-0.0195	0.17334	-0.49743	-0.23892	0.885246	0.803279	0.934426	0.459016
ENSMUSG00000014791	0.34356	0.2684	0.18957	0.04686	1.91071	2.05357	2.21429	3.51786
ENSMUSG00000014813	-0.23653	-0.57727	-0.20696	-0.09337	0.513266	0.397072	0.663312	1.93321
ENSMUSG00000014837	-0.15956	0.00164	0.23529	-0.15348	1.12292	1.15947	1.2392	2.13289
ENSMUSG00000014846	0.28793	0.05732	0.176	0.08031	1.16418	1.04478	1.46269	1.98507
ENSMUSG00000014850	-0.50339	0.20257	-0.29577	-0.02928	0.95235	1.09856	1.45496	1.21671
ENSMUSG00000014852	0.09567	0.14926	0.24549	0.18337	1.54054	0.891892	0.675676	0.297297
ENSMUSG00000014856	0.31143	0.02197	0.17547	-0.196	0.873175	0.935219	1.08759	1.06661
ENSMUSG00000014859	0.07567	0.04847	0.16217	-0.2338	1.34894	1.46383	1.61489	1.77872
ENSMUSG00000014867	0.12254	0.5458	0.25272	0.49839	0.951414	0.893178	1.18283	1.1979
ENSMUSG00000014873	0.54888	0.5802	0.53436	-0.04982	0.860759	1.06962	1.39241	1.48101
ENSMUSG00000014905	-0.45752	-0.45269	-0.71908	-0.99722	0.913745	1.18022	1.09607	1.06522
ENSMUSG00000014907	-0.12857	-1.63218	-1.23161	-1.12333	0.565476	0.654762	0.375	0.744048
ENSMUSG00000014932	-0.39095	0.0144	-0.37125	-0.5836	0.884829	1.32883	1.44083	1.5004
ENSMUSG00000014956	0.07574	-0.08666	0.12217	0.04035	0.80372	1.29472	1.18675	1.40753
ENSMUSG00000014959	0.00161	-0.07068	0.09536	0.55721	0.702071	0.859663	0.751534	1.16871
ENSMUSG00000014980	-0.02232	-0.37776	0.02611	-0.4057	1.01039	0.651948	1.03506	1.10779
ENSMUSG00000015001	0.666667	6.33333	2	8	1.75	0.75	0.375	1.25
ENSMUSG00000015002	0.00206	0.28809	-0.08111	0.01901	0.927905	0.733142	1.02475	1.09326
ENSMUSG00000015013	-0.15964	-0.33005	-0.08608	-0.10062	0.856345	1.01836	0.742219	0.884278
ENSMUSG00000015016	0.32132	0.46728	0.5834	0.27151	0.644186	0.827907	0.632558	0.688372
ENSMUSG00000015023	0.42677	0.81211	0.17255	1.04745	1.1373	0.831284	0.743169	1.36612
ENSMUSG00000015027	0.26109	0.33931	0.12175	0.46545	0.638418	1.75141	0.813559	1.36158
ENSMUSG00000015053	0.52608	-0.90406	0.04975	0.18598	1.01905	1.08571	1.08571	1.4
ENSMUSG00000015083	0.40307	0.71236	0.68428	0.2523	1.89691	1.35052	1.57045	0.879725
ENSMUSG00000015085	-0.01129	0.10203	0.36556	0.18107	0.678161	0.666667	0.752874	1.09195
ENSMUSG00000015087	0.1197	0.18247	0.24416	0.09659	1.07143	1.01818	0.844156	1.2
ENSMUSG00000015090	0.27059	0.33065	0.36596	0.07026	1.45632	1.55541	1.04694	0.966102
ENSMUSG00000015092	0.52757	0.52104	0.344	0.2724	1.15508	1.15348	1.13262	0.867914
ENSMUSG00000015093	0.26329	1.88889	0.49519	0.06731	2.2	4.2	2	3.6
ENSMUSG00000015094	0.42466	0.52724	0.14318	0.03295	1.27621	1.54032	1.40927	0.941532
ENSMUSG00000015095	0.48019	0.57579	0.78528	0.9919	1.20714	1.35604	1.11978	0.796154
ENSMUSG00000015112	-0.13531	0.23179	-0.06415	0.18388	1.02698	0.84	1.3386	1.56
ENSMUSG00000015120	0.06832	0.19161	0.33062	-0.00155	0.777848	0.944684	1.08734	0.866076
ENSMUSG00000015126	0.13788	-0.04295	0.0957	-0.23769	0.921196	0.997283	1.0625	0.970109
ENSMUSG00000015127	-0.32372	-0.31997	-0.14745	-0.48996	0.568323	0.782609	0.947205	0.745342
ENSMUSG00000015133	0.06413	0.21715	0.00272	0.18991	1.50427	1.51923	1.0406	1.35256
ENSMUSG00000015134	-0.48815	-0.28882	0.49341	-0.41585	0.3	0.373913	0.882609	0.63913
ENSMUSG00000015143	0.09227	-0.1406	-0.07149	-0.183	1.15718	1.57724	1.36043	1.55014
ENSMUSG00000015149	0.32184	0.57445	0.4607	0.59702	1.17899	1.16221	0.970789	0.923555
ENSMUSG00000015165	0.21042	-0.11138	-0.16312	-0.12328	0.716477	1.17145	1.04227	1.66595
ENSMUSG00000015176	0.02114	0.22131	0.36348	0.21389	1.40498	1.59917	1.32468	1.21045
ENSMUSG00000015189	-0.36371	0.32788	-0.14732	0.09644	1.00883	1.05044	1.40353	2.07188
ENSMUSG00000015202	-0.47353	0.11923	-0.29578	-0.27573	0.887417	0.870861	1.44702	0.877483
ENSMUSG00000015214	0.29353	0.18486	0.0366	-0.17345	1.10753	1.56989	1.64516	1.5914
ENSMUSG00000015217	0.20275	0.36641	0.10088	0.41656	1.02167	1.67248	1.42468	1.73494
ENSMUSG00000015222	-0.05983	0.32147	0.06497	0.28643	0.545781	0.64632	0.526032	0.7693
ENSMUSG00000015224	-0.42448	0.0489	-0.44354	-0.39559	2.12987	2.80519	2.75325	3.93506
ENSMUSG00000015242	1.27273	0.363636	0.0909091	0.545455	5.8	2.8	0.4	3
ENSMUSG00000015243	0.0003	0.09775	-0.1186	-0.169	1.00631	1.3963	1.37106	1.06437
ENSMUSG00000015247	-0.30263	-0.2483	-0.27514	-0.01167	0.695545	0.930693	1.11337	1.36782
ENSMUSG00000015289	0.00283	-0.03828	-0.11511	-0.29567	1.01556	1.03516	1.10663	1.05245
ENSMUSG00000015290	0.25009	0.23486	0.17294	0.11608	1.10169	1.1084	1.05715	0.919984
ENSMUSG00000015291	0.03642	0.34996	0.37843	0.34792	1.23926	1.3951	1.14617	1.17405
ENSMUSG00000015305	-0.05206	-0.14363	-0.25568	0.11222	1.71429	2.01524	1.82857	1.25714
ENSMUSG00000015312	-0.50649	0.01657	-0.18199	-0.08148	1.64286	1.09286	0.828571	1.22857
ENSMUSG00000015314	0.78625	1.15488	0.5883	0.22429	0.5	0.384615	0.515385	0.261538
ENSMUSG00000015316	-0.18545	-0.003	-0.0239	-0.19113	1.575	0.675	0.6	0.725
ENSMUSG00000015335	0.07546	0.14173	0.19786	0.06932	0.930693	0.825743	0.837624	0.708911
ENSMUSG00000015337	0.17767	-0.11431	-0.12778	0.09262	0.882353	0.441176	0.382353	0.882353
ENSMUSG00000015340	-1.24067	-1.09876	-0.91887	-0.86598	0.978142	1.07104	0.579235	1.47541
ENSMUSG00000015341	-0.05914	0.02401	-0.13552	-0.13421	1.09464	1.27009	1.44235	1.30776
ENSMUSG00000015342	-0.93064	-0.30487	-0.16149	-1.14795	0.924171	1.40758	1.53555	0.511848
ENSMUSG00000015354	0.36128	-0.14086	0.15838	0.50516	0.5	1.06667	0.933333	0.7
ENSMUSG00000015355	0.12146	0.0879	0.04334	0.53068	0.611111	0.5	0.148148	0.444444
ENSMUSG00000015357	-0.19288	0.18284	0.01582	0.06987	0.967616	0.723488	1.17117	0.851601
ENSMUSG00000015363	0.14305	0.83404	0.47138	0.82793	1.13904	1.48396	1.04545	0.965241
ENSMUSG00000015365	0.03991	0.32265	-0.09011	-0.02461	0.891497	1.11033	0.613719	0.409233
ENSMUSG00000015377	0.12213	0.53026	0.05206	-0.3339	0.771084	1.21687	1.18072	0.909639
ENSMUSG00000015396	0.84989	-0.25376	0.12363	0.23401	0.858491	1.01887	0.45283	1.16038
ENSMUSG00000015401	-0.43484	-0.21365	-0.12765	0.30835	9.2	15.8	7.2	15.4
ENSMUSG00000015405	0.34515	-1.17305	-0.07343	-0.42516	0.560694	1.79769	0.815029	0.190751
ENSMUSG00000015437	0.6	1	1.6	0.6	1.42857	0.142857	1	0.571429
ENSMUSG00000015441	0	0	0	0	2	4	1	1
ENSMUSG00000015443	0	0	0.5	0.75	0.333333	0.666667	0	0
ENSMUSG00000015451	0.4678	0.2357	0.89962	0.48161	1.46939	0.469388	1.59184	0.489796
ENSMUSG00000015452	0.23452	0.25599	0.32776	0.22638	0.365854	0.463415	0.097561	0.97561
ENSMUSG00000015461	0.35075	0.55189	0.66733	0.26394	1.06371	1.13996	0.76834	0.781853
ENSMUSG00000015467	0.53215	0.06188	0.62498	0.01086	0.255814	0.372093	1.13953	1.09302
ENSMUSG00000015468	0.40236	0.70991	1.27767	0.53826	0.337662	1.51948	0.285714	0.519481
ENSMUSG00000015474	-0.07574	0.08092	0.15995	0.06585	0.844498	1.2488	1.46411	1.23684
ENSMUSG00000015476	-0.04586	0.857143	0.285714	0.03166	1	0.105263	0.736842	0.421053
ENSMUSG00000015478	0.19518	0.19555	0.10888	-0.05545	0.641317	0.631101	0.968218	0.961407
ENSMUSG00000015484	-0.0489	0.75	0.916667	0.21287	1.45455	0.454545	0.909091	0.636364
ENSMUSG00000015488	0.0388	0.30958	0.30295	0.1601	0.952756	0.781777	0.824522	1.1631
ENSMUSG00000015501	0.56446	0.45735	0.41657	0.24686	1.71739	1.55435	0.75	1.19565
ENSMUSG00000015519	7	3	4	3	0.888889	0.888889	0.777778	0.555556
ENSMUSG00000015522	0.2814	0.50412	0.33062	0.55173	0.916776	1.45872	1.07471	1.15596
ENSMUSG00000015533	-0.91004	-1.05567	-1.93105	-0.53102	1.4625	1.80625	2.1625	1.175
ENSMUSG00000015536	-0.21233	-0.14184	-0.10367	-0.46658	0.634752	0.925532	0.523641	0.986998
ENSMUSG00000015542	-0.0139	-0.00865	0.09266	-0.16904	0.922027	1.03899	1.01559	1.03509
ENSMUSG00000015568	0.23211	0.03302	0.7491	0.09722	1.091	1.00894	0.940032	1.13204
ENSMUSG00000015575	0.03246	-0.39287	-0.07493	-0.41701	1.11368	1.33448	1.23631	1.41888
ENSMUSG00000015579	0.5	0	0.25	0	1.33333	0.666667	0	0
ENSMUSG00000015597	-0.11368	-0.05378	-0.40997	0.0082	1.31032	1.54659	1.91181	1.9609
ENSMUSG00000015599	0.08647	-0.32346	0.11549	0.0759	0.488636	0.522727	0.329545	0.943182
ENSMUSG00000015605	-0.21418	0.07572	0.26227	0.01824	0.984375	1.26562	2.03125	2.49219
ENSMUSG00000015619	0.48787	0.11901	-0.04684	0.67697	3.225	2.925	7.3	3.525
ENSMUSG00000015627	0.444444	1.22222	0.777778	4	1.35294	0.588235	0.647059	0.588235
ENSMUSG00000015647	-0.28184	0.27185	0.18923	0.86874	0.626263	0.838384	1.81818	2.87879
ENSMUSG00000015652	0.02224	-0.16423	-0.11523	-0.07217	0.307692	0.884615	0.826923	0.288462
ENSMUSG00000015653	-0.51719	-0.41805	-0.73591	-0.79631	0.604004	0.715239	0.986652	0.906563
ENSMUSG00000015656	-0.0856	-0.02233	-0.02453	-0.15364	0.987838	0.967789	0.947961	0.975283
ENSMUSG00000015659	0.01196	0.77106	0.68932	0.81684	1.79444	1	1.22778	1.10556
ENSMUSG00000015665	0.375	0.375	0.5	1.25	1.85714	1.14286	0.714286	1.42857
ENSMUSG00000015668	-0.0104	-0.1025	-0.07451	-0.17177	1.05371	0.977739	1.00459	0.967845
ENSMUSG00000015671	0.03236	-0.12336	0.08898	-0.3283	1.00871	1.27779	1.54743	1.51638
ENSMUSG00000015672	-0.11804	-0.28368	-0.07428	-0.56433	0.998585	1.21578	1.24761	1.11779
ENSMUSG00000015697	0.08601	-0.061	0.17187	-0.02962	1.10818	1.28041	1.23574	1.22928
ENSMUSG00000015702	0.03519	-0.33396	0.25967	-0.30816	0.666667	1.83333	0.833333	2.91667
ENSMUSG00000015709	0.36688	0.67565	0.27671	0.27926	0.56187	0.983501	1.08708	0.758937
ENSMUSG00000015711	0.018	0.11592	-0.03478	-0.28294	0.912409	1.14294	1.13382	0.913625
ENSMUSG00000015714	0.04217	0.23792	0.40283	0.16426	0.810678	1.01441	1.29741	1.27972
ENSMUSG00000015721	0.00608	0.75323	-0.41052	0.54535	0.539631	0.197703	0.993107	0.800087
ENSMUSG00000015733	0.05635	-0.09512	0.09448	-0.02275	1.14962	1.34568	1.36085	1.46889
ENSMUSG00000015745	0.28164	0.43447	0.34321	0.08013	1.51667	2.03333	1.07778	1.65556
ENSMUSG00000015747	-0.48168	0.0598	-0.38033	-0.47828	0.989928	1.20144	1.03741	0.854676
ENSMUSG00000015748	-0.38422	-0.06421	-0.15605	0.02247	1.20838	1.10646	1.44054	1.20951
ENSMUSG00000015749	0.37598	0.39964	0.7105	0.47276	0.967713	1.06278	0.949477	1.18894
ENSMUSG00000015750	0.20288	0.44328	0.19292	0.24861	1.89244	1.67059	1.98319	2.08235
ENSMUSG00000015755	0.21199	0.30389	0.25881	0.09659	1.10209	1.30162	1.56999	1.35035
ENSMUSG00000015757	0.08241	0.14424	0.06643	0.1777	1.40766	1.55975	1.80341	1.20124
ENSMUSG00000015759	-0.09143	-0.09849	-0.04169	-0.26633	1.06461	1.10654	1.39953	1.31751
ENSMUSG00000015766	0.20681	0.28452	0.07594	0.20599	0.579923	0.560618	0.896525	1.58301
ENSMUSG00000015776	0.15623	0.25666	0.32009	0.1042	0.93083	0.939723	0.963439	0.883399
ENSMUSG00000015787	-0.03906	0.05605	0.28649	-0.12998	0.842105	1.36842	0.421053	0.842105
ENSMUSG00000015790	0.15001	0.09899	0.08377	-0.02283	1.17636	1.33302	1.27017	1.18293
ENSMUSG00000015804	0.07527	-0.19243	-0.23719	-0.41376	0.995302	0.959679	1.12312	1.0689
ENSMUSG00000015806	0.2704	0.44217	0.20197	0.17516	1.04608	1.29608	1.34898	1.22355
ENSMUSG00000015812	-0.8644	-0.59186	-0.44458	-0.37529	1.09091	0.863636	0.636364	0.954545
ENSMUSG00000015829	0.12404	-0.09162	0.53162	0.15973	2.84375	1.71875	3	1
ENSMUSG00000015837	0.07173	0.17171	-0.06711	-0.05643	0.738636	0.72469	0.709711	0.944731
ENSMUSG00000015839	-0.11262	0.20044	0.34404	0.35883	0.958421	1.29947	1.42579	1.65579
ENSMUSG00000015843	0.79864	0.5	2.33333	-0.08502	0.875	0.375	1.125	0.375
ENSMUSG00000015846	0.33439	0.19236	0.52416	0.35628	0.881579	0.817669	0.783835	0.849624
ENSMUSG00000015850	0.53842	-0.40785	0.2669	0.16499	0.971429	0.9	0.442857	1.17143
ENSMUSG00000015852	-0.20481	-0.00782	-0.42226	-0.44033	0.909091	1.11688	1.16883	0.454545
ENSMUSG00000015854	0.444444	0.666667	0.444444	1.11111	3.33333	0.666667	0.833333	3.66667
ENSMUSG00000015869	-0.1336	0.04262	0.10686	0.1332	1.04616	1.10236	1.31059	1.37331
ENSMUSG00000015879	-0.79305	-0.54604	-0.60961	-0.43318	2.39189	1	1.60811	1.40541
ENSMUSG00000015880	-0.00011	-0.13692	0.00602	-0.02131	1.0469	1.11689	1.48599	1.2059
ENSMUSG00000015882	0.07032	0.1937	0.03122	-0.1878	1.37469	1.87346	1.49959	1.47001
ENSMUSG00000015889	0.05264	-0.18945	-0.17637	0.09722	0.899371	1.05425	1.1077	1.00629
ENSMUSG00000015890	0.7	1.3	0.8	1.1	1.6	1.6	1.8	1.3
ENSMUSG00000015932	0.01029	-0.16555	-0.03102	-0.13237	1.11588	1.3055	1.38479	1.36505
ENSMUSG00000015937	0.25966	0.33257	0.35163	0.19868	0.820808	1.35518	1.01204	1.30784
ENSMUSG00000015942	-0.38527	-0.33743	-0.39189	-0.11143	1.0837	0.361233	0.709251	1.25551
ENSMUSG00000015943	0.21787	-0.01225	0.0436	0.07673	1.05357	1.22679	1.22321	1.13393
ENSMUSG00000015944	0.05531	-0.16768	-0.35018	-0.65193	2.09106	1.63902	1.22927	2.01626
ENSMUSG00000015947	-0.48208	-0.45125	0.04304	-1.06216	3.93333	2.13333	0.466667	4.33333
ENSMUSG00000015950	-0.61266	-0.27517	-0.12666	0.10284	0.44	0.5	0.34	2.32
ENSMUSG00000015957	0.82543	0.46896	0.5357	1.3063	1.37705	1.81967	1.81967	0.606557
ENSMUSG00000015961	-0.26583	-0.32889	-0.53279	-0.3891	1.02562	1.23484	1.55508	1.37432
ENSMUSG00000015962	3.5	1	0.5	1	8	1	0.5	1
ENSMUSG00000015966	0.28084	0.1636	-0.20207	-0.41879	0.772523	0.738739	0.918919	0.583333
ENSMUSG00000015968	-0.17391	0.43318	-0.20864	0.13409	1.39873	1.99684	1.74895	1.37975
ENSMUSG00000015970	-0.28089	-0.02992	-0.47557	-0.91266	1.22819	1.36913	1.75168	0.557047
ENSMUSG00000015971	0.32135	0.77187	0.58672	0.56045	1.43273	1.54819	1.54628	1.54389
ENSMUSG00000015980	-0.52909	-0.09005	-0.26165	-0.05842	1.08392	0.867133	1.93706	0.426573
ENSMUSG00000015981	1.5	0.75	1.25	0.5	0.818182	0.181818	0.0909091	0.454545
ENSMUSG00000015994	-0.02037	0.34714	0.09696	0.13794	0.890723	1.14387	1.32233	1.32075
ENSMUSG00000016018	-0.01209	0.32909	0.06547	-0.00968	1.11057	1.41624	1.43108	1.55286
ENSMUSG00000016024	0.34077	0.00022	0.81288	0.98063	1.14179	0.828358	1.05224	1.00746
ENSMUSG00000016028	-0.1715	-0.52542	0.10245	-0.35338	0.209431	0.47018	0.165049	0.638003
ENSMUSG00000016087	0.34109	-0.97098	0.03486	-0.19495	0.705691	1.66829	1.00488	0.747967
ENSMUSG00000016128	-1.02693	-0.97942	-0.09037	-1.31933	0.663717	1.06195	0.923304	0.823009
ENSMUSG00000016150	0.08532	0.16857	-0.00151	0.18823	0.727273	0.80303	1.14646	0.444444
ENSMUSG00000016179	0.52842	0.76247	0.84788	0.6413	0.97823	1.27317	1.46629	0.757022
ENSMUSG00000016181	-0.73335	-0.18195	-0.53141	-0.3387	1.17401	1.09049	1.19954	0.573086
ENSMUSG00000016194	-0.133	-0.17059	0.11975	-0.35122	0.846154	0.824176	0.626374	0.230769
ENSMUSG00000016200	-0.13195	-0.45624	-0.68524	-0.56958	0.759307	1.55671	1.09177	0.668398
ENSMUSG00000016206	-0.43603	-0.22552	-0.1906	-0.4444	1.46627	1.17091	0.872564	1.58921
ENSMUSG00000016239	-0.23064	-0.62639	-0.26604	-0.52555	2.01639	1.72678	1.18033	0.84153
ENSMUSG00000016252	0.00659	-0.039	-0.15795	-0.21848	0.958911	1.35376	1.14709	1.02261
ENSMUSG00000016253	0.19977	0.12114	0.25078	0.42401	0.909443	0.952058	1.30847	0.974818
ENSMUSG00000016255	2	0.333333	1	0.333333	0.714286	0	0.142857	2.85714
ENSMUSG00000016256	0.02833	0.03887	-0.01136	-0.11016	1.02689	1.29724	1.06794	1.15711
ENSMUSG00000016257	0.17564	0.34433	0.15881	0.49491	0.934712	1.3969	1.39237	1.1991
ENSMUSG00000016262	-0.18852	-0.24817	-0.70401	-0.62326	0.50838	1.07821	0.73743	0.709497
ENSMUSG00000016283	0.46714	0.76073	0.39435	0.37378	0.714286	12.2857	2.85714	1.28571
ENSMUSG00000016308	0.12734	0.00502	0.09473	-0.05157	0.985983	1.23017	1.29605	1.14802
ENSMUSG00000016319	0.08152	-0.16038	0.03255	0.03872	0.985021	1.00803	1.10646	1.26056
ENSMUSG00000016327	0.25677	-0.10804	0.19015	-0.07755	1.13043	0.913043	0.869565	0.521739
ENSMUSG00000016344	0.50833	0.0804	0.08132	0.14062	0.992366	1.12118	1.33111	1.18511
ENSMUSG00000016346	-0.63158	-0.03546	0.08526	-0.01726	1.54	0.8	1.88	1.56
ENSMUSG00000016349	0.75	0.75	0.25	1	1.75	0.375	0.75	0.125
ENSMUSG00000016356	-0.16922	-0.42934	-0.00776	-0.81646	1.25	0.839286	0.839286	0.696429
ENSMUSG00000016382	0.03355	0.07146	-0.20751	0.02742	1.22049	1.8441	1.44358	1.4786
ENSMUSG00000016386	-0.07473	-0.0525	-0.34927	-0.80808	0.74	1.01	0.78	0.63
ENSMUSG00000016409	-0.32082	-0.30817	-0.33847	-0.42256	1.01489	1.27171	1.59057	1.19851
ENSMUSG00000016427	-0.01556	-0.2509	-0.17914	-0.49568	1.07473	1.29028	1.02981	1.31706
ENSMUSG00000016458	0.1899	-0.15353	-0.08337	0.21195	1.5247	1.94976	1.98912	1.40106
ENSMUSG00000016477	0.1654	-0.41813	-0.27647	-1.18444	0.826715	1.13718	0.783394	1.41155
ENSMUSG00000016481	-0.15345	-0.17187	-0.10007	-0.22726	1.04497	1.10507	1.3426	1.32993
ENSMUSG00000016487	-0.40438	0.02458	-0.0101	0.36035	0.857806	1.09344	1.02902	1.63436
ENSMUSG00000016493	-0.02214	-0.32069	0.18285	-0.51899	1.23125	1.25625	1.99375	2.3375
ENSMUSG00000016494	0.40896	0.32337	0.40557	0.6164	0.65117	1.07951	0.938442	1.60693
ENSMUSG00000016495	-0.04175	-0.22219	0.07852	-0.04428	0.803639	1.05686	1.09174	1.41471
ENSMUSG00000016496	-0.0543	0.13997	0.18966	0.82048	0.472441	0.598425	0.811024	1.29921
ENSMUSG00000016498	0.5	1.25	0.75	4.75	2.75	0	2	4.75
ENSMUSG00000016503	0.19683	0.45198	0.32869	0.35389	1.14391	1.16201	0.985197	0.964638
ENSMUSG00000016510	0.35991	0.20876	0.51981	0.01414	0.766761	1.16732	1.15493	1.09972
ENSMUSG00000016520	0.09969	-0.31864	-0.13687	-0.05298	1.96654	1.70632	1.79182	2.39033
ENSMUSG00000016524	0.5	1	1	0	1	0.666667	0.666667	0.333333
ENSMUSG00000016526	-0.42047	0.18971	0.10596	-0.5706	1.2766	1.04255	2.23404	4
ENSMUSG00000016528	0.24015	0.16789	-0.187	-0.18824	0.846354	1.05729	0.794271	1.46354
ENSMUSG00000016529	4	2	2	1	2.16667	0.333333	0	1.16667
ENSMUSG00000016534	-0.09008	0.14252	-0.00439	-0.03911	0.990678	1.1564	1.45945	1.17255
ENSMUSG00000016541	-0.01722	-0.08774	-0.03968	0.35998	1.088	1.40583	1.26708	1.33481
ENSMUSG00000016552	-0.85368	-0.318	-0.19315	-0.31175	0.744493	0.484581	0.722467	0.665198
ENSMUSG00000016554	0.34454	0.37519	0.51387	0.43656	0.824148	0.840404	1.05313	0.862411
ENSMUSG00000016559	0.1719	-0.02003	-0.09778	-0.05247	1.08311	1.10493	1.183	1.12141
ENSMUSG00000016619	0.38574	0.5735	0.28573	0.09225	0.649071	0.686989	0.921933	0.834944
ENSMUSG00000016624	-0.81966	1	-0.34194	-0.53487	1.78571	0.964286	0.5	1.35714
ENSMUSG00000016626	-0.31144	-0.13496	-0.21589	-0.0519	0.954805	1.05798	1.27282	1.28084
ENSMUSG00000016637	0.07621	0.0085	0.25487	-0.02007	1.20699	1.5622	1.21334	0.86289
ENSMUSG00000016664	-0.10976	0.51096	0.34356	0.42113	1.07581	0.947911	1.25993	1.10779
ENSMUSG00000016756	-0.16532	-0.32976	-0.79882	-0.04256	1.38121	1.26596	0.851064	0.794326
ENSMUSG00000016757	0.16843	0.19808	0.31425	0.1006	0.788347	0.845422	0.979786	1.03567
ENSMUSG00000016758	-0.10945	-0.26426	0.04036	0.42889	1.58333	4.58333	3.41667	2.58333
ENSMUSG00000016763	-0.35639	0.09883	0.09581	-0.50232	0.66129	0.887097	0.415323	2.27823
ENSMUSG00000016831	0.02216	-0.17418	0.03245	-0.16112	1.29079	1.94864	1.39199	1.50453
ENSMUSG00000016833	-0.09416	-0.34189	-0.10323	-0.39408	0.934346	1.17357	1.16373	1.3213
ENSMUSG00000016918	0.23659	0.22131	-0.38307	0.2965	1	0.929104	0.885821	0.987313
ENSMUSG00000016921	-0.30322	-0.34439	-0.23742	-0.54517	0.874131	1.02886	1.27747	1.40612
ENSMUSG00000016933	0.13482	-0.0636	0.18448	0.20382	0.938119	0.82797	1.31498	1.12191
ENSMUSG00000016940	-0.21904	-0.09225	-0.01496	0.05862	0.887955	0.868347	0.882353	0.848739
ENSMUSG00000016942	1.13838	0.97273	1.73404	0.80952	0.571429	0.333333	0.166667	0.666667
ENSMUSG00000016946	0.15251	0.29024	0.21088	0.02004	0.676471	0.638009	0.843891	1.06109
ENSMUSG00000016982	0.230769	1.07692	0.384615	0.307692	1.46154	0.461538	0.692308	0.307692
ENSMUSG00000016984	-0.51371	-0.91776	-0.60705	-1.06263	1.10309	1.15464	1.50515	1.78351
ENSMUSG00000016995	-0.79304	-0.44532	-0.459	-0.49706	0.717949	0.512821	0.384615	1.12821
ENSMUSG00000016998	0.666667	1	1	0.666667	2	1.5	0.5	2
ENSMUSG00000017000	1	2	0	2	0	1	1	0
ENSMUSG00000017002	0.00265	0.0555556	0.444444	-0.83208	4	0.666667	6	9.33333
ENSMUSG00000017003	0.5	0	0.5	0	3.5	1	2.5	0
ENSMUSG00000017004	2	9	3	0	0.125	1	0.25	0.375
ENSMUSG00000017007	1.875	1.5	1.125	0.625	0.552632	0.289474	0.5	0.552632
ENSMUSG00000017009	0.39424	0.85912	0.77988	1.06017	1.14795	1.49262	1.15688	1.18846
ENSMUSG00000017049	0.666667	1	0.333333	0.333333	0.272727	0.454545	0	0.636364
ENSMUSG00000017057	-0.10573	0.38552	0.10233	-0.41508	0.918984	1.69407	1.05079	0.864571
ENSMUSG00000017064	0.666667	1.66667	0.333333	0	2.5	1	0	0
ENSMUSG00000017119	0.34211	0.19688	0.15244	0.08981	1.36892	1.36402	1.31152	1.67518
ENSMUSG00000017132	0.19804	-0.22897	-0.26106	-0.24035	1.2	1.41	1.88	1.31
ENSMUSG00000017144	0.09823	-0.21123	0.19827	0.26126	1.03116	1.87462	1.57523	1.16945
ENSMUSG00000017146	-0.00234	-0.31783	-0.39719	0.0219	0.906742	1.14719	1.65955	1.44831
ENSMUSG00000017165	0.5	0	0	0.5	0.6	0.4	0	0
ENSMUSG00000017167	-0.3871	-0.13539	-0.6656	-0.34811	1.49275	2.78261	1.36232	0.652174
ENSMUSG00000017176	0.09131	0.14456	0.14774	0.18527	0.848268	0.658901	0.913381	0.936081
ENSMUSG00000017188	0.28646	0.21892	0.35478	0.19325	0.989192	1.04494	0.922639	0.88339
ENSMUSG00000017195	-0.85374	0.37486	-0.02825	-0.26294	0.964286	0.75	3	1.07143
ENSMUSG00000017204	1.01732	0.02845	0.18337	0.34237	0.666667	0.555556	1.05556	0.666667
ENSMUSG00000017210	0.03254	0.3436	0.37745	0.45355	0.590055	0.938122	1.02652	0.977901
ENSMUSG00000017211	1.3	0.8	0.6	0.2	0.768293	0.0731707	0.0365854	0.0365854
ENSMUSG00000017221	0.03299	0.18852	-0.08474	0.05584	1.11311	1.22951	1.44262	1.44098
ENSMUSG00000017264	0.05524	0.21821	0.31652	0.13794	0.960221	1.18787	1.15045	0.847578
ENSMUSG00000017286	0.30475	0.42706	0.37353	0.38049	1.01	1.144	1.1755	1.148
ENSMUSG00000017288	0.3083	0.60752	0.43472	0.23998	1.07622	1.12262	1.10522	1.05634
ENSMUSG00000017291	-0.01262	-0.2354	-0.15406	-0.21884	1.10807	1.45052	1.68708	1.46091
ENSMUSG00000017299	-0.05949	-0.15492	-0.14119	-0.50953	0.792373	0.944915	1.0339	1.5678
ENSMUSG00000017300	1.75	1.25	2.25	0	0	4	0	0
ENSMUSG00000017307	0.05784	-0.24843	0.06111	0.1362	1.50732	1.71707	1.59024	1.2439
ENSMUSG00000017309	0.0623	0.23525	1.13831	0.77801	0.428571	0.587302	0.349206	0.253968
ENSMUSG00000017310	-0.44051	-0.18133	0.16874	-0.64302	2.66667	0.703704	2.25926	1.92593
ENSMUSG00000017311	0	2	1	0	3	1	0.5	0
ENSMUSG00000017314	-0.06432	-0.02977	0.06383	0.11894	0.42268	0.505155	0.278351	0.969072
ENSMUSG00000017316	1	0	2	0	1.5	0	0	0
ENSMUSG00000017344	-0.12177	1.85714	0.67431	0.58684	1.5	1.30769	1.88462	0.346154
ENSMUSG00000017376	-0.17303	-0.28659	-0.21631	-0.33711	1.17878	1.26937	1.33731	1.88081
ENSMUSG00000017386	0.22126	1.41494	1.27305	1.2437	1.11765	1.2598	1.84804	1.51471
ENSMUSG00000017390	-0.04689	-0.34637	-0.39926	-0.23339	0.677083	0.713542	1.65625	0.46875
ENSMUSG00000017400	-0.60253	-0.48751	-0.35761	-0.41863	3.64286	1.39286	0.642857	1
ENSMUSG00000017404	0.05514	-0.39203	-0.06709	-0.38868	0.962208	1.16867	0.810833	1.32293
ENSMUSG00000017405	-0.07743	0.17697	-0.07112	0.01406	0.977925	0.94702	1.21854	1.18102
ENSMUSG00000017412	-0.18567	1.19408	1.39222	2.67192	0.864912	0.27193	0.454386	0.359649
ENSMUSG00000017417	0.33089	0.607	-0.37963	0.26125	1.25714	1.49091	1.04156	1.04416
ENSMUSG00000017418	-0.03856	0.21554	-0.02347	-0.05005	0.933817	1.11151	1.08794	1.35993
ENSMUSG00000017421	-0.10254	-0.06762	0.27751	-0.02659	0.86556	1.21949	1.35529	1.36454
ENSMUSG00000017428	0.0748	0.14873	0.1783	0.2053	0.888382	1.0595	1.18849	1.26645
ENSMUSG00000017446	0.59921	0.98868	0.4984	1.07618	1.2	2.06286	0.768571	1.68571
ENSMUSG00000017453	0.16969	0.15229	0.17264	-0.36631	0.420561	0.420561	0.584112	0.672897
ENSMUSG00000017466	0.15427	0.11848	0.4202	-0.2839	0.809945	1.27845	1.35249	1.06851
ENSMUSG00000017478	0.3312	0.16816	-0.02932	0.54136	0.961468	1.42752	1.13028	1.0055
ENSMUSG00000017485	0.48267	-0.24764	-0.00931	-0.16522	0.799768	1.21183	1.39428	1.07151
ENSMUSG00000017491	-0.02343	0.01902	-0.41281	-0.20749	0.769231	1.5641	0.974359	1.02564
ENSMUSG00000017493	0.12607	0.57364	-0.11655	-0.02374	0.575013	0.807109	1.11187	1.00941
ENSMUSG00000017499	-0.06535	0.1911	-0.03757	-0.08075	0.778557	0.990982	0.705411	0.950902
ENSMUSG00000017548	-0.06613	-0.22688	-0.12724	-0.13089	0.995283	1.06671	1.68329	1.44205
ENSMUSG00000017550	-0.33585	-0.58678	-1.04208	-0.62549	1.11974	1.61842	1.64868	1.28553
ENSMUSG00000017561	-0.18372	0.02433	-0.03195	-0.35694	1.20833	1.10688	1.18841	1.29348
ENSMUSG00000017588	0	1.5	0.25	0.5	0.75	0.25	0.25	0.125
ENSMUSG00000017607	-0.60167	-0.53194	-0.00139	-0.69308	2.17143	0.457143	3.25714	0.2
ENSMUSG00000017615	0.1704	0.17625	0.2905	0.24025	1.04845	1.26181	1.34667	1.18357
ENSMUSG00000017631	0.01534	-0.05437	-0.06937	0.08177	1.48849	1.0773	1.36842	1.26974
ENSMUSG00000017639	0.6177	0.78951	0.32286	0.27143	0.988836	1.18979	1.28549	0.620415
ENSMUSG00000017652	0.99208	0.48959	0.44226	0.83152	0.365854	0.756098	0.463415	1.06098
ENSMUSG00000017664	0.54367	0.81003	0.84469	0.56202	0.818627	1.12353	0.985294	0.644118
ENSMUSG00000017667	0.04166	0.00807	-0.09806	-0.09035	0.91691	0.861516	1.40233	1.11662
ENSMUSG00000017670	0.26682	0.00619	0.41687	0.39388	0.979472	0.916911	0.848485	1.11046
ENSMUSG00000017677	-0.0194	-0.04089	-0.09607	-0.02387	1.05682	1.56317	1.36479	1.39244
ENSMUSG00000017679	-0.01042	-0.17684	-0.17716	0.12236	1.01493	1.36364	1.29715	1.05427
ENSMUSG00000017686	-0.23474	0.043	-0.12	-0.59804	1.03528	0.986638	1.13095	1.21807
ENSMUSG00000017688	1	0.4	1	1.8	2.2	1.2	1.6	1.2
ENSMUSG00000017692	0.3322	-0.36605	0.45851	-0.18712	1.11429	0.957143	1.84286	0.771429
ENSMUSG00000017697	0.29661	-0.01813	-0.27638	-0.27536	1.37624	1.53465	1.36139	1.25743
ENSMUSG00000017707	-0.21481	-0.70519	-0.43673	-0.5846	0.982969	1.71909	1.25862	1.68461
ENSMUSG00000017713	0.45315	0.83835	0.69567	-0.25456	1.14286	0.959184	0.163265	1.57143
ENSMUSG00000017715	0.22537	0.31818	0.64063	0.20536	0.628366	0.775583	0.86535	1.2693
ENSMUSG00000017716	-0.15312	-0.15679	-0.05972	-0.51535	0.950154	1.02236	1.1879	0.973333
ENSMUSG00000017718	-0.52504	0.13218	0.18292	0.09942	0.805471	0.559271	1.19757	0.650456
ENSMUSG00000017720	0.5	0.5	0.5	1.5	6	1.5	0.5	8.5
ENSMUSG00000017721	-0.01819	-0.06106	-0.31683	-0.18626	0.788151	0.833034	0.874327	0.960503
ENSMUSG00000017723	0.16866	0.03675	0.14417	0.38418	2.66667	2.38889	3.11111	0.888889
ENSMUSG00000017724	-0.48134	1.75	0.02324	-0.14949	0.857143	0.142857	0.785714	1.28571
ENSMUSG00000017733	-0.63406	-0.1586	0.35646	-0.21987	1.44578	1.06024	0.686747	2.46988
ENSMUSG00000017734	0.56318	0.52668	-0.06575	0.11152	2.36735	2.40816	4.10204	3.32653
ENSMUSG00000017737	-0.1132	0	1.8	0.11485	0.6875	0.625	0.4375	0.625
ENSMUSG00000017740	-0.07469	-1.01312	-0.39836	0.12563	1.26316	0.526316	1.55263	1.21053
ENSMUSG00000017747	-0.64273	-0.25985	-0.36995	-0.18897	0.833333	1.30667	1.62667	1.08667
ENSMUSG00000017754	0.28858	0.23008	0.22799	0.43546	0.94	1.48286	1.15143	1.63429
ENSMUSG00000017756	0.12612	0.97856	0.36738	0.43072	1.18917	1.33357	1.6852	0.412996
ENSMUSG00000017760	0.43004	0.71305	0.36671	0.44347	0.986568	0.955625	1.25066	0.754617
ENSMUSG00000017764	-0.20754	-0.04333	-0.03038	-0.06907	0.936484	1.1743	0.837518	0.880355
ENSMUSG00000017765	-0.05176	0.71386	0.32955	0.45299	0.886497	1.52446	0.972603	1.28963
ENSMUSG00000017767	-0.31939	-0.37805	-0.33367	-0.50167	0.930233	1.60465	1.32558	1.23256
ENSMUSG00000017774	0.56339	0.70324	0.59287	0.33353	1.10029	0.851958	1.02197	1.03916
ENSMUSG00000017776	-0.51049	-0.58522	-0.71224	-0.84628	0.928845	1.11494	1.53804	1.51834
ENSMUSG00000017778	0.05227	-0.47944	-0.28198	-0.44605	0.927778	1.28452	1.58532	1.03175
ENSMUSG00000017781	0.09443	-0.42091	-0.22012	-0.27626	0.776366	1.24524	1.12071	0.839898
ENSMUSG00000017801	0.00105	-0.24134	-0.2292	-0.49998	1.24182	0.923186	1.27454	0.859175
ENSMUSG00000017802	-0.20281	-0.11906	0.13117	0.12395	1.15764	1.0936	1.06158	1.44581
ENSMUSG00000017817	0.33246	0.692308	0.09424	-0.17779	1.35294	2.94118	0.647059	1.52941
ENSMUSG00000017830	0.30116	0.68575	0.88774	0.7644	2.52941	4	1.64706	3.17647
ENSMUSG00000017831	0.16074	-0.4606	-0.08208	-0.46772	1.12769	1.25681	2.02726	1.37733
ENSMUSG00000017832	2	3	3	0	0.8	0.4	3	3
ENSMUSG00000017837	0.18712	0.50559	0.37934	0.35319	0.874262	0.992405	1.0616	0.948523
ENSMUSG00000017843	0.04159	-0.15654	0.21912	-0.03784	1.00145	1.3221	1.24804	1.48359
ENSMUSG00000017858	-0.17014	-0.28531	-0.16524	-0.31554	1.12209	1.32556	1.1755	1.0479
ENSMUSG00000017861	0.08203	0.40606	0.27141	0.1978	0.783987	0.826522	1.23436	0.52377
ENSMUSG00000017868	1.5	2.33333	1.33333	0.5	2	0.727273	3.72727	0.636364
ENSMUSG00000017897	-0.0242	-0.66656	0.27751	-0.32314	0.255319	1.19149	1.44681	0.276596
ENSMUSG00000017922	1.5	0.5	0	0.5	0.5	0	0.666667	1.33333
ENSMUSG00000017929	0.63583	0.15659	0.50084	0.41484	0.757679	1.04096	1.16724	1.17065
ENSMUSG00000017943	0.625	1.625	1.5	0.25	1.16667	6.33333	0.166667	4
ENSMUSG00000017950	0.24333	-0.00425	0.2582	0.40952	0.622642	0.320755	0.207547	0.132075
ENSMUSG00000017969	0.06809	0.13579	0.28193	-0.00183	0.6689	1.46794	0.821053	0.950239
ENSMUSG00000017978	-0.22284	-0.20458	-0.54006	-0.1765	0.87931	2.10057	1.77874	1.3908
ENSMUSG00000017999	0.14226	0.45977	0.55288	0.20023	0.857939	1.52925	0.839833	0.747214
ENSMUSG00000018001	0.05086	0.36039	-0.16952	0.17157	1.04252	1.08857	1.03189	1.32064
ENSMUSG00000018008	-1.29878	-1.48778	-0.773	0.20471	1.21569	2.03922	1.01961	0.490196
ENSMUSG00000018012	-0.90011	-0.22128	-0.23358	-0.48815	0.775	0.5	0.375	0.4
ENSMUSG00000018040	0.33195	0.89959	0.92655	0.67707	0.90257	0.87045	0.884368	1.10493
ENSMUSG00000018042	0.49497	0.59096	0.78488	0.73025	0.928934	1.2445	1.00874	0.85251
ENSMUSG00000018068	0.42393	0.35278	0.34545	0.42677	0.81452	1.19256	1.01107	0.749004
ENSMUSG00000018076	0.17114	0.04983	0.17361	0.13673	1.12301	1.39009	1.34112	1.37585
ENSMUSG00000018102	-0.09343	-0.5062	0.00669	-0.66157	1.09677	0.475806	0.637097	2.25
ENSMUSG00000018126	-0.1109	0.5	5.16667	-0.10143	1.21429	0.142857	0.428571	0.142857
ENSMUSG00000018143	0.16565	0.14042	0.32541	0.23163	0.820467	0.960503	1.05206	0.886894
ENSMUSG00000018160	0.15539	0.334	-0.00164	0.0243	0.95081	1.09013	1.11546	1.02622
ENSMUSG00000018166	-0.00668	0.48835	0.79443	0.0742	1.17593	1.40741	1.62037	0.564815
ENSMUSG00000018167	0.11903	0.39352	0.46533	0.68369	0.940476	0.804422	0.870748	0.980442
ENSMUSG00000018168	-0.02876	-0.29435	-0.24959	-0.48425	0.854167	0.625	0.6875	0.5
ENSMUSG00000018169	0.35997	0.25616	0.3636	-0.02728	0.902778	1.40278	1.15278	1.01389
ENSMUSG00000018171	-0.15944	0.06214	0.21205	0.12307	0.895185	1.11652	1.04389	0.874967
ENSMUSG00000018189	-0.03945	0.2498	-0.00384	0.11718	0.92061	1.1447	1.30113	1.21079
ENSMUSG00000018196	0.33284	0.14365	0.20441	0.03746	0.796407	0.956587	0.723054	1.24102
ENSMUSG00000018199	-0.37684	-0.67151	-0.26436	0.01072	0.835878	1.52735	1.48028	0.786896
ENSMUSG00000018209	0.33706	0.22615	0.77356	0.37894	1.80952	1.63222	1.73759	1.90172
ENSMUSG00000018211	1	2	7	2	0	0.6	0.4	0.2
ENSMUSG00000018217	0.40397	0.44257	0.37577	0.1457	0.889325	0.952904	1.23653	1.04814
ENSMUSG00000018238	0.0006	-0.177	-0.03305	0.37055	0.884611	1.16562	1.50177	1.8133
ENSMUSG00000018239	-0.19598	-0.29675	0.02282	-0.08423	1.4264	1.59391	1.52961	1.79188
ENSMUSG00000018259	0.3	0.15	0.25	0.05	5	2	1	11.5
ENSMUSG00000018263	-0.75887	0.285714	-0.80235	-0.36778	2.25	0.65	0.2	0.25
ENSMUSG00000018286	0.11964	-0.06783	0.136	-0.09859	1.02997	1.1141	1.08313	1.14478
ENSMUSG00000018287	0.05803	0.00097	0.24605	0.18415	1.28621	1.35274	1.30457	1.13271
ENSMUSG00000018293	0.48262	0.3923	0.20848	0.15537	1.24148	1.12827	1.26592	1.17345
ENSMUSG00000018322	0.26376	-0.06488	0.06994	-0.10839	1.03299	1.28144	1.19794	1.13299
ENSMUSG00000018326	-0.18411	-0.11742	-0.34082	-0.18242	0.939492	1.1351	1.08291	1.55196
ENSMUSG00000018334	0.5981	0.85663	0.59441	0.89212	0.995595	1.1674	0.502203	1.49339
ENSMUSG00000018339	-0.01032	0.11766	-0.243	-0.10997	0.880481	0.823197	0.99505	1.44908
ENSMUSG00000018340	0.29353	0.24929	-0.0404	0.39658	0.908283	1.15469	1.10949	0.985628
ENSMUSG00000018341	1.6	0.8	1.4	1.6	1.42857	1.28571	0.714286	1.71429
ENSMUSG00000018347	0.17701	-0.1199	0.03359	-0.09154	1.16327	1.05782	1.45578	1.5102
ENSMUSG00000018362	0.40725	0.42134	0.59967	0.80498	1.00861	0.988843	1.00175	1.26522
ENSMUSG00000018363	-0.27199	0.10585	0.20396	-0.23716	1.50214	1.62767	1.9572	2.39658
ENSMUSG00000018372	-0.45429	0.01771	-0.65071	0.07918	0.96582	0.744141	0.786133	0.716797
ENSMUSG00000018377	-0.10587	-0.17116	-0.1174	-0.41689	0.827443	0.963271	1.34997	1.0201
ENSMUSG00000018378	0.60841	0.72986	0.4165	1.05769	0.897233	0.992095	0.86166	0.517787
ENSMUSG00000018379	-0.03031	-0.08113	-0.2721	-0.46466	0.844219	1.14189	1.03041	1.54204
ENSMUSG00000018381	0.03482	0.11158	0.33272	0.49736	0.931034	1.93103	0.344828	1.13793
ENSMUSG00000018387	-0.6697	0.28644	0.2839	0.18887	0.970149	0.656716	1.89552	1.58209
ENSMUSG00000018395	0.05213	0.31949	0.09753	0.0353	1.24495	1.40641	1.52744	1.09766
ENSMUSG00000018398	-0.12596	-0.35947	-0.44514	-0.96015	0.852941	1.23856	0.826797	0.895425
ENSMUSG00000018401	0.21657	-0.0981	0.17342	-0.14713	0.911497	1.30273	0.813896	1.15467
ENSMUSG00000018405	0.13725	0.2852	0.61853	0.44939	0.345679	0.277778	0.512346	0.154321
ENSMUSG00000018411	-0.34387	0.12742	0.62705	-0.63785	1.23188	0.347826	1.62319	0.797101
ENSMUSG00000018412	0.16251	0.41438	0.42541	0.60571	0.89287	1.22658	1.1467	1.34267
ENSMUSG00000018415	-0.02313	-0.00295	-0.0324	-0.08034	1.15915	1.29449	0.854352	0.979396
ENSMUSG00000018417	-0.38606	-0.11147	-0.0906	-0.04591	0.861815	0.799004	0.908165	1.47195
ENSMUSG00000018425	-0.05081	0.0207	-0.24945	-0.16728	1.31948	1.53683	1.46227	1.41753
ENSMUSG00000018427	-0.04342	-0.01823	0.08927	-0.13293	1.2153	1.59727	1.86448	1.60164
ENSMUSG00000018428	-0.12859	0.02569	0.03469	0.45614	0.773087	0.488127	0.733509	0.763852
ENSMUSG00000018433	0.0706	0.15324	0.53842	0.35198	1.16454	1.49788	1.47665	1.2914
ENSMUSG00000018442	0.00711	-0.09776	-0.05866	-0.14321	0.976254	1.11022	1.15099	1.18952
ENSMUSG00000018446	-0.11005	0.09234	-0.04559	-0.42618	0.416306	0.627706	0.839105	2.13276
ENSMUSG00000018449	0.22208	0.33283	0.54999	0.05361	0.982374	0.942421	1.02468	1.00353
ENSMUSG00000018451	0.59432	0.49006	0.00638	0.45793	1.17867	1.70893	1.32853	0.737752
ENSMUSG00000018459	-0.31434	0.473684	-0.20969	-0.07353	1.55556	0.888889	1.5	1.16667
ENSMUSG00000018470	0.07391	-0.85745	-0.04294	-0.06036	0.684685	0.882883	1.40541	1.14414
ENSMUSG00000018474	0.02228	-0.52989	-0.19723	-0.41258	1.05316	0.729114	1.43038	1.11646
ENSMUSG00000018476	0.56952	0.41702	0.31515	0.42964	0.830829	0.940456	0.853088	1.35448
ENSMUSG00000018479	3.4	1	2.6	1.4	0.714286	0.714286	2.71429	1.85714
ENSMUSG00000018481	-0.11344	-0.17939	0.18484	-0.24558	0.737457	1.12317	1.44624	1.33024
ENSMUSG00000018486	0.857143	0.571429	2.57143	0.571429	1.38462	0.923077	1.07692	0.769231
ENSMUSG00000018500	-0.65288	0.08972	-0.02113	-0.02887	0.781818	0.609091	0.827273	1.19091
ENSMUSG00000018501	-0.06859	-0.15064	-0.11683	-0.23502	1.21096	1.81285	1.77405	1.47375
ENSMUSG00000018507	0.47252	0.63268	0.39395	0.31609	0.709677	2.62903	3.03226	0.145161
ENSMUSG00000018509	0.15757	-0.00844	0.33325	-0.31981	0.793548	1.2	1.6129	0.690323
ENSMUSG00000018537	-0.03205	-0.59403	-0.05294	0.07348	0.933333	2.07451	1.4	1.46667
ENSMUSG00000018541	0.15429	0.32041	0.35168	0.07824	0.988189	1.35171	1.01706	0.877953
ENSMUSG00000018543	8	7	8	10	1.2	2.2	2.2	2.2
ENSMUSG00000018547	0.2402	0.62978	0.13441	-0.47099	0.559322	0.355932	0.661017	0.870056
ENSMUSG00000018548	0.05162	0.72863	0.22538	0.33506	0.668862	0.757485	0.797006	0.933533
ENSMUSG00000018554	0.34443	0.40651	-0.00847	-0.00876	1.14058	1.12029	0.868116	0.908696
ENSMUSG00000018559	-0.29136	-0.24458	-0.07821	-0.2085	0.737609	1.19242	0.77551	0.827988
ENSMUSG00000018565	0.17837	-0.05722	0.01625	-0.13973	1.00964	1.09774	1.16217	0.981002
ENSMUSG00000018566	0.57865	0.85049	0.64233	0.44294	1.59259	1	2.07407	1.7037
ENSMUSG00000018567	0.04951	-0.05639	-0.04196	-0.23124	1.09616	1.27621	1.16027	1.12822
ENSMUSG00000018569	0.61674	0.35274	1.24072	1.11772	2.16667	4.5	5.5	1.66667
ENSMUSG00000018570	0.67378	0.82941	0.31318	0.75914	2.27586	2.37931	2.65517	2.75862
ENSMUSG00000018572	0.15413	-0.16652	0.5151	-0.6297	1.28947	1.12955	1.44332	1.02429
ENSMUSG00000018574	0.26887	0.09886	0.44639	0.50761	1.13204	1.26375	0.909709	1.01327
ENSMUSG00000018581	-0.35366	-0.72528	-0.87719	-1.22314	1.38387	0.66129	1.86774	1.04516
ENSMUSG00000018583	0.07356	-0.06094	-0.22296	-0.25083	0.929302	1.24619	1.23687	1.66742
ENSMUSG00000018585	0.17215	-0.181	0.07394	-0.09897	0.973356	1.33306	1.09492	1.18901
ENSMUSG00000018589	-0.25076	-0.15488	-0.48262	-0.0435	1.19565	0.782609	0.891304	1.21739
ENSMUSG00000018593	0.36593	0.48171	0.59972	0.48945	0.905878	1.04047	1.00412	0.885582
ENSMUSG00000018595	0.30975	-0.25184	-0.13924	-0.05398	0.6	1.93333	0.133333	0.2
ENSMUSG00000018599	0.11658	0.2415	0.06768	-0.37517	1.35918	1.13469	1.06939	1.22857
ENSMUSG00000018604	0.12517	-0.0255	0.15892	-0.04655	1.44014	2.19014	1.3169	1.87676
ENSMUSG00000018620	-0.48683	-0.31801	-0.70243	-0.17874	0.42623	0.442623	0.409836	0.344262
ENSMUSG00000018623	-0.07217	-0.24314	0.35281	-0.73413	0.156863	1.03922	0.509804	0.54902
ENSMUSG00000018634	0.02463	0.53801	1.7125	2.48221	1.42857	1.57143	5.85714	4.14286
ENSMUSG00000018648	-0.38148	-0.62518	-0.31113	-0.65568	1.03117	1.57143	1.68831	1.56364
ENSMUSG00000018651	0.17861	0.37042	0.4354	0.21759	0.956695	1.10142	1.09573	1.12764
ENSMUSG00000018654	0.47459	0.32424	0.19054	-0.43666	0.106383	0.0595745	0.110638	0.114894
ENSMUSG00000018656	0.777778	1.88889	0.777778	1.44444	1	0.275862	0.241379	0.586207
ENSMUSG00000018659	-0.14377	0.48699	0.69412	0.3048	0.961175	1.13326	0.648478	1.35887
ENSMUSG00000018661	0.05428	-0.06008	-0.19746	-0.43204	0.90228	1.6873	1.01629	1.15635
ENSMUSG00000018666	-0.07306	-0.28634	-0.29316	-0.38219	0.972441	1.29942	1.1409	1.26067
ENSMUSG00000018669	0.42167	0.7417	0.49928	0.57357	1.04663	1.05995	0.770192	0.888426
ENSMUSG00000018672	0.65397	0.80684	0.2274	0.73603	0.829588	1.24345	0.926966	0.709738
ENSMUSG00000018677	0.33753	0.61054	0.33895	0.46436	0.852269	1.23448	1.08639	1.04283
ENSMUSG00000018678	0.37164	0.28534	0.47325	0.23285	0.933638	1.37071	1.67735	1.20595
ENSMUSG00000018697	0.26429	0.07768	0.24243	-0.10956	1.21144	1.23383	1.04478	1.20232
ENSMUSG00000018698	3.4	1.4	0.6	2.2	2.6	3.6	6.2	7
ENSMUSG00000018707	0.50657	0.88893	0.75463	0.59649	0.913312	1.21746	1.12107	0.865413
ENSMUSG00000018727	-0.09303	-0.3378	0.03995	0.00069	1.24273	0.966498	1.69912	1.04425
ENSMUSG00000018733	0.62459	0.74646	0.68922	0.69911	0.639785	0.744624	0.535842	0.533154
ENSMUSG00000018736	-0.25144	0.14767	0.01066	-0.1363	0.968017	1.6823	1.0995	1.38522
ENSMUSG00000018740	0.90713	0.27254	0.24124	0.68894	0.807018	0.602339	1.21637	1.47368
ENSMUSG00000018750	0.04454	0.11978	0.04416	-0.34945	0.734375	1.19844	1.36719	1.08594
ENSMUSG00000018752	0.12386	0.02519	-0.94922	0.00912	0.965909	0.306818	1.5	0.909091
ENSMUSG00000018761	-0.01611	0.08228	-0.00502	-0.02039	0.938365	1.14717	1.11572	0.864151
ENSMUSG00000018765	0.16151	0.27052	0.24411	0.23854	0.864608	1.14727	0.852732	0.767221
ENSMUSG00000018770	-0.28406	-0.37398	-0.30249	-0.47116	0.964203	1.21407	1.25412	1.52224
ENSMUSG00000018774	0.33521	0.02019	0.22047	0.16324	1.81818	2.79545	2.70455	1.47727
ENSMUSG00000018776	0.25	0.5	0.25	1	1.83333	1.16667	0.166667	0
ENSMUSG00000018796	0.97599	1.05151	1.10943	1.12768	0.748173	1.10432	0.969435	0.321595
ENSMUSG00000018800	-0.31935	-0.70296	-0.6758	-0.52463	1.8427	2.59176	3.05618	2.15356
[truncated: 47,805 more rows]

## Sheet: FDR
geneID	1h		2h30		4h		6h
	pval	pAdj	pval	pAdj	pval	pAdj	pval	pAdj
ENSMUSG00000000001	0.419308950145206	0.999940051448475	0.613037399675975	0.999528357155053	0.408747400139112	0.99935717060686	0.706072808481104	0.999763342266748
ENSMUSG00000000028	0.999434740533354	0.999940051448475	0.963253971504868	0.999528357155053	0.595488225692127	0.99935717060686	0.694524834409631	0.999763342266748
ENSMUSG00000000031	0.0618556802774504	0.999940051448475	0.25548834256047	0.999528357155053	0.0573624728959072	0.785260071752117	0.301885991596437	0.999763342266748
ENSMUSG00000000037	0.698915559387874	0.999940051448475	0.900162328190597	0.999528357155053	0.982779594360049	0.99935717060686	0.895033986350163	0.999763342266748
ENSMUSG00000000056	0.694485915914514	0.999940051448475	0.657303528467975	0.999528357155053	0.517135646594896	0.99935717060686	0.759155303010435	0.999763342266748
ENSMUSG00000000058	0.923221857777014	0.999940051448475	0.157168640983916	0.951334985515308	0.656480813340142	0.99935717060686	0.730138480355502	0.999763342266748
ENSMUSG00000000078	0.59052871087069	0.999940051448475	0.38051473258854	0.999528357155053	0.749450743595859	0.99935717060686	0.374690113925976	0.999763342266748
ENSMUSG00000000085	0.520499658192929	0.999940051448475	0.789558809264741	0.999528357155053	0.864776833023373	0.99935717060686	0.672140278226378	0.999763342266748
ENSMUSG00000000088	0.318115307530962	0.999940051448475	0.502404894048949	0.999528357155053	0.54196540644741	0.99935717060686	0.800316784463856	0.999763342266748
ENSMUSG00000000093	0.843054309935335	0.999940051448475	0.843245262467912	0.999528357155053	0.0332585976809345	0.676331531096526	0.293508610061922	0.999763342266748
ENSMUSG00000000094	0.933114834068091	0.999940051448475	0.97082079603123	0.999528357155053	0.923115369849433	0.99935717060686	0.52419068285019	0.999763342266748
ENSMUSG00000000120	0.0825295477667602	0.999940051448475	0.882063593807605	0.999528357155053	0.565865340827372	0.99935717060686	0.471705824901184	0.999763342266748
ENSMUSG00000000126	0.817901251651107	0.999940051448475	0.445542527334873	0.999528357155053	0.346054819365406	0.99935717060686	0.514561599040627	0.999763342266748
ENSMUSG00000000127	0.330090719583771	0.999940051448475	0.368935926800018	0.999528357155053	0.893726208091562	0.99935717060686	0.680019455724896	0.999763342266748
ENSMUSG00000000131	0.247878054642582	0.999940051448475	0.130221743540988	0.927006003780105	0.194484586863918	0.99935717060686	0.25821672270722	0.999763342266748
ENSMUSG00000000134	0.910367380897377	0.999940051448475	0.815094855220557	0.999528357155053	0.568962217755465	0.99935717060686	0.722767762919593	0.999763342266748
ENSMUSG00000000142	0.663689353586732	0.999940051448475	0.658373547547234	0.999528357155053	0.0491287905272856	0.760348142899488	0.211228710166596	0.998535270553233
ENSMUSG00000000148	0.616128375846251	0.999940051448475	0.606632031495933	0.999528357155053	0.279896239175558	0.99935717060686	0.613207109039628	0.999763342266748
ENSMUSG00000000149	0.876060817606232	0.999940051448475	0.629618574733181	0.999528357155053	0.814544277395911	0.99935717060686	0.656786191707955	0.999763342266748
ENSMUSG00000000157	0.323536407615717	0.999940051448475	0.668726648267099	0.999528357155053	0.882137621933407	0.99935717060686	0.451300461359905	0.999763342266748
ENSMUSG00000000167	0.250525204429485	0.999940051448475	0.689082243688262	0.999528357155053	0.26011200549716	0.99935717060686	0.890845335821178	0.999763342266748
ENSMUSG00000000168	0.653551704065821	0.999940051448475	0.0829077591545725	0.844290794852293	0.82988182173033	0.99935717060686	0.399928391576393	0.999763342266748
ENSMUSG00000000171	0.857072668896816	0.999940051448475	0.384045512955908	0.999528357155053	0.999953807706574	0.999961276749553	0.308863548033812	0.999763342266748
ENSMUSG00000000184	0.0739662244732612	0.999940051448475	0.157289129768234	0.951334985515308	0.0560208601979128	0.785260071752117	0.042567817237632	0.716231635845863
ENSMUSG00000000194	0.283318226122072	0.999940051448475	0.890298828607622	0.999528357155053	0.961928206472267	0.99935717060686	0.160944478516282	0.96662073498817
ENSMUSG00000000197	0.980046680486909	0.999940051448475	0.192848515909211	0.976542056184533	0.748811780590066	0.99935717060686	0.945860529558038	0.999763342266748
ENSMUSG00000000202	0.0342380677409159	0.987461419542383	0.4457890838303	0.999528357155053	0.388511929268748	0.99935717060686	0.31327206596142	0.999763342266748
ENSMUSG00000000204	0.0299634950510571	0.941762969164957	0.110946776617936	0.899956514708997	0.656871336349329	0.99935717060686	0.848940290283017	0.999763342266748
ENSMUSG00000000214	0.630912772947436	0.999940051448475	0.189029744974083	0.974380426131001	0.805904165146557	0.99935717060686	0.414175245620011	0.999763342266748
ENSMUSG00000000223	0.0449406552617342	0.999940051448475	0.409192188803547	0.999528357155053	0.0972433360478622	0.882657586511652	0.232428742801334	0.999763342266748
ENSMUSG00000000244	0.666903160574521	0.999940051448475	0.266609881420429	0.999528357155053	0.0252343529740294	0.615930334715184	0.326070514180876	0.999763342266748
ENSMUSG00000000247	0.306826465255234	0.999940051448475	0.266964573108355	0.999528357155053	0.333515742068385	0.99935717060686	0.52212591644894	0.999763342266748
ENSMUSG00000000253	0.623168422764379	0.999940051448475	0.650344908755951	0.999528357155053	0.871636012865202	0.99935717060686	0.709156307138704	0.999763342266748
ENSMUSG00000000266	0.333724339392633	0.999940051448475	0.929225809059181	0.999528357155053	0.921496117452653	0.99935717060686	0.896243446233261	0.999763342266748
ENSMUSG00000000275	0.700286511474047	0.999940051448475	0.237865116353344	0.999528357155053	0.780541019522342	0.99935717060686	0.601944301641067	0.999763342266748
ENSMUSG00000000276	0.0925564576092346	0.999940051448475	0.852428441921025	0.999528357155053	0.6876108275187	0.99935717060686	0.952469204785997	0.999763342266748
ENSMUSG00000000278	0.941938970596521	0.999940051448475	0.616976404932351	0.999528357155053	0.746914463947395	0.99935717060686	0.912685673436929	0.999763342266748
ENSMUSG00000000282	0.624614207693827	0.999940051448475	0.72889443996879	0.999528357155053	0.360520907528515	0.99935717060686	0.800836167179082	0.999763342266748
ENSMUSG00000000290	0.199809996340989	0.999940051448475	0.375344137119997	0.999528357155053	0.414096730306541	0.99935717060686	0.907359690058819	0.999763342266748
ENSMUSG00000000295	0.974802908105659	0.999940051448475	0.505386777212669	0.999528357155053	0.927316074400556	0.99935717060686	0.467529259635415	0.999763342266748
ENSMUSG00000000296	0.941784472962962	0.999940051448475	0.608550287425506	0.999528357155053	0.377252372079266	0.99935717060686	0.772390150664233	0.999763342266748
ENSMUSG00000000301	0.580125303920031	0.999940051448475	0.848928759487412	0.999528357155053	0.794074112845847	0.99935717060686	0.388327069061339	0.999763342266748
ENSMUSG00000000303	0.292962051122131	0.999940051448475	0.869673751683967	0.999528357155053	0.887249335504391	0.99935717060686	0.379318070360393	0.999763342266748
ENSMUSG00000000305	0.994537798795149	0.999940051448475	0.455541186906878	0.999528357155053	0.429858875678471	0.99935717060686	0.832930516655953	0.999763342266748
ENSMUSG00000000317	0.269685882386465	0.999940051448475	0.700949541559767	0.999528357155053	0.19859112241759	0.99935717060686	0.711331773573624	0.999763342266748
ENSMUSG00000000318	0.41514583172714	0.999940051448475	0.342885014752866	0.999528357155053	0.339122228057617	0.99935717060686	0.193668308883048	0.986031883899733
ENSMUSG00000000320	0.759459915966047	0.999940051448475	0.984808015330938	0.999528357155053	0.261489292303266	0.99935717060686	0.259516798685205	0.999763342266748
ENSMUSG00000000325	0.199386923521942	0.999940051448475	0.21400912680734	0.988483895602801	0.187197164026318	0.99935717060686	0.561045232413067	0.999763342266748
ENSMUSG00000000326	0.204925098338566	0.999940051448475	0.111337958274579	0.899956514708997	0.157497763199352	0.983007755897834	0.0823329307914623	0.859733189257545
ENSMUSG00000000339	0.093188567312727	0.999940051448475	0.597270648633039	0.999528357155053	0.198903139786688	0.99935717060686	0.279663449475577	0.999763342266748
ENSMUSG00000000340	0.337886168271547	0.999940051448475	0.311136641136511	0.999528357155053	0.474936553910283	0.99935717060686	0.582161267610507	0.999763342266748
ENSMUSG00000000346	0.250917957135311	0.999940051448475	0.0675589055333947	0.800244612257745	0.0265319586176401	0.629295701403317	0.515855046285292	0.999763342266748
ENSMUSG00000000355	0.888702479772726	0.999940051448475	0.748616112479733	0.999528357155053	0.964287853678653	0.99935717060686	0.340318773631199	0.999763342266748
ENSMUSG00000000359	0.0118191663078194	0.733973519962467	0.0416513695103307	0.715260365439226	0.0135132750443206	0.481036616136762	0.0286876881438948	0.617339111467172
ENSMUSG00000000365	0.467003742393163	0.999940051448475	0.849256371054166	0.999528357155053	0.374082050312906	0.99935717060686	0.693604464278506	0.999763342266748
ENSMUSG00000000374	0.551980960559651	0.999940051448475	0.355754089855574	0.999528357155053	0.244700575318944	0.99935717060686	0.892627916174232	0.999763342266748
ENSMUSG00000000378	0.457943411546048	0.999940051448475	0.280671838380871	0.999528357155053	0.846676658353586	0.99935717060686	0.186106304317647	0.978835938772012
ENSMUSG00000000384	0.691943114963062	0.999940051448475	0.104147975594925	0.895681331029122	0.127292418746834	0.945259981488987	0.580238590229007	0.999763342266748
ENSMUSG00000000386	0.562400654230667	0.999940051448475	0.861268121404327	0.999528357155053	0.16586064217317	0.988103572557963	0.0709022342887227	0.826937202478229
ENSMUSG00000000392	0.110742763451746	0.999940051448475	0.957599628320686	0.999528357155053	0.287935591174583	0.99935717060686	0.214410678701844	0.998535270553233
ENSMUSG00000000399	0.805791311388612	0.999940051448475	0.751898449922843	0.999528357155053	0.700866487159776	0.99935717060686	0.920161238692812	0.999763342266748
ENSMUSG00000000402	0.177918694721291	0.999940051448475	0.625135769532273	0.999528357155053	0.94037340133353	0.99935717060686	0.774283128565542	0.999763342266748
ENSMUSG00000000409	0.892963283429222	0.999940051448475	0.94981101064688	0.999528357155053	0.834164334093427	0.99935717060686	0.164896160482167	0.969423288358625
ENSMUSG00000000416	0.343679673448348	0.999940051448475	0.162897089351884	0.951776497358995	0.439487325942595	0.99935717060686	0.300287037129477	0.999763342266748
ENSMUSG00000000420	0.941361915120919	0.999940051448475	0.636830383472991	0.999528357155053	0.364928798429923	0.99935717060686	0.487524325196469	0.999763342266748
ENSMUSG00000000435	0.686068135150502	0.999940051448475	0.573437843571654	0.999528357155053	0.403558086474324	0.99935717060686	0.394772306708184	0.999763342266748
ENSMUSG00000000439	0.532922029899449	0.999940051448475	0.0981302010301616	0.880033850190758	0.425599554473577	0.99935717060686	0.788704367817061	0.999763342266748
ENSMUSG00000000440	0.917343966258715	0.999940051448475	0.721277608461736	0.999528357155053	0.876526530317649	0.99935717060686	0.716686234523474	0.999763342266748
ENSMUSG00000000441	0.0632965848463054	0.999940051448475	0.209548415268345	0.987855253447846	0.297250794766077	0.99935717060686	0.620525019460654	0.999763342266748
ENSMUSG00000000486	0.312310455196584	0.999940051448475	0.295750737655548	0.999528357155053	0.0749333215354832	0.837555404432028	0.0534925369234724	0.754497644276361
ENSMUSG00000000489	0.471603220178433	0.999940051448475	0.176075234556488	0.965444174107826	0.611897796240623	0.99935717060686	0.416391693606461	0.999763342266748
ENSMUSG00000000530	0.484525984824325	0.999940051448475	0.565824420403921	0.999528357155053	0.0248966800841635	0.611579637695559	0.02082852025468	0.551471731456514
ENSMUSG00000000531	0.349106183593838	0.999940051448475	0.91319558054264	0.999528357155053	0.644817963859979	0.99935717060686	0.493971291098072	0.999763342266748
ENSMUSG00000000532	0.947364669755767	0.999940051448475	0.981369604017538	0.999528357155053	0.196885015074632	0.99935717060686	0.658569302405139	0.999763342266748
ENSMUSG00000000538	0.880900930847703	0.999940051448475	0.19846949369433	0.982274732395069	0.0891559733626956	0.866154645247814	0.506549333709189	0.999763342266748
ENSMUSG00000000552	0.458000439720366	0.999940051448475	0.681778357836397	0.999528357155053	0.164317791562284	0.988103572557963	0.481098043379944	0.999763342266748
ENSMUSG00000000555	0.449945742553748	0.999940051448475	0.150173434624181	0.946210448481842	0.488032020847919	0.99935717060686	0.0610334691660666	0.794530638370051
ENSMUSG00000000560	0.638648459471529	0.999940051448475	0.152208740313785	0.947201608892512	0.225391713729901	0.99935717060686	0.784131798463265	0.999763342266748
ENSMUSG00000000561	0.576208471724323	0.999940051448475	0.617474118806741	0.999528357155053	0.134150701288426	0.955055052969257	0.100474107175423	0.900309383186848
ENSMUSG00000000562	0.973490223269656	0.999940051448475	0.800491849171088	0.999528357155053	0.942034275844583	0.99935717060686	0.387866130636967	0.999763342266748
ENSMUSG00000000563	0.720341814096091	0.999940051448475	0.617589764407342	0.999528357155053	0.535851016851618	0.99935717060686	0.339541564586049	0.999763342266748
ENSMUSG00000000567	0.623186793486917	0.999940051448475	0.801815594974226	0.999528357155053	0.846748899406898	0.99935717060686	0.728434462328391	0.999763342266748
ENSMUSG00000000568	0.926305317157516	0.999940051448475	0.258192664659611	0.999528357155053	0.55034970547021	0.99935717060686	0.526618301329807	0.999763342266748
ENSMUSG00000000579	0.107046367507145	0.999940051448475	0.277473642086478	0.999528357155053	0.995789857548941	0.99935717060686	0.65543306433716	0.999763342266748
ENSMUSG00000000581	0.554795367374954	0.999940051448475	0.731985888433041	0.999528357155053	0.533844923904368	0.99935717060686	0.982678447998698	0.999763342266748
ENSMUSG00000000594	0.164015838035103	0.999940051448475	0.0462997673899676	0.734497845767431	0.37067641029762	0.99935717060686	0.164396144041848	0.969423288358625
ENSMUSG00000000600	0.722715596636079	0.999940051448475	0.82150978054761	0.999528357155053	0.761877996194136	0.99935717060686	0.715393974596433	0.999763342266748
ENSMUSG00000000605	0.52022232929664	0.999940051448475	0.204372050567581	0.984526274927622	0.174936386948299	0.99519877055526	0.0639148402740147	0.797543006452634
ENSMUSG00000000627	0.309442088105149	0.999940051448475	0.785471034259032	0.999528357155053	0.258089335215884	0.99935717060686	0.607444193777386	0.999763342266748
ENSMUSG00000000628	0.768816235988027	0.999940051448475	0.819704706521488	0.999528357155053	0.832563107011625	0.99935717060686	0.426271967615318	0.999763342266748
ENSMUSG00000000631	0.366423117394587	0.999940051448475	0.632217826927493	0.999528357155053	0.0145024511036626	0.494392929082591	0.00110615751779563	0.128350850634686
ENSMUSG00000000632	0.528334704240973	0.999940051448475	0.0984159437438204	0.88047125805507	0.125525506558186	0.943812654547475	0.100090883348498	0.899743152300904
ENSMUSG00000000682	0.583606657244931	0.999940051448475	0.2701561594708	0.999528357155053	0.333302217326265	0.99935717060686	0.39414071852143	0.999763342266748
ENSMUSG00000000686	0.182143470977968	0.999940051448475	0.273113789387361	0.999528357155053	0.412057464066775	0.99935717060686	0.122885769032039	0.935203736872577
ENSMUSG00000000693	0.127729820752053	0.999940051448475	0.197933451237676	0.982274732395069	0.205378262823834	0.99935717060686	0.799311183739512	0.999763342266748
ENSMUSG00000000706	0.568373863962497	0.999940051448475	0.752108931202041	0.999528357155053	0.000276290515202189	0.0532518854255463	0.030026414982578	0.632114160171477
ENSMUSG00000000708	0.531518108743349	0.999940051448475	0.462681742597874	0.999528357155053	0.644453890807639	0.99935717060686	0.670578501351243	0.999763342266748
ENSMUSG00000000711	0.439461127253072	0.999940051448475	0.321415456824601	0.999528357155053	0.711282729949039	0.99935717060686	0.761292833955305	0.999763342266748
ENSMUSG00000000730	0.494665838507674	0.999940051448475	0.220185210504047	0.991184927473607	0.461180142219364	0.99935717060686	0.572612662589763	0.999763342266748
ENSMUSG00000000731	0.346655815675832	0.999940051448475	0.35153122769977	0.999528357155053	0.317542326596543	0.99935717060686	0.628289764510368	0.999763342266748
ENSMUSG00000000732	0.864517443483454	0.999940051448475	0.873713961391423	0.999528357155053	0.417531574075822	0.99935717060686	0.942368496921685	0.999763342266748
ENSMUSG00000000738	0.393575872271911	0.999940051448475	0.231136830849708	0.998931603093046	0.113801586929595	0.922510128656577	0.5405492678256	0.999763342266748
ENSMUSG00000000739	0.301035963896744	0.999940051448475	0.59542648971183	0.999528357155053	0.210682634037818	0.99935717060686	0.490922622299281	0.999763342266748
ENSMUSG00000000740	0.137243826751713	0.999940051448475	0.0016366239795506	0.173775785577472	0.0159725666981316	0.516645981833401	0.00213940971781371	0.181217127670204
ENSMUSG00000000743	0.450592159773158	0.999940051448475	0.00817149667321938	0.397783023327691	0.272741651627512	0.99935717060686	0.0316732161420194	0.64781897309191
ENSMUSG00000000751	0.818395395489195	0.999940051448475	0.321810353305631	0.999528357155053	0.350264348211962	0.99935717060686	0.663048753093699	0.999763342266748
ENSMUSG00000000753	0.292748722995521	0.999940051448475	0.461052158249724	0.999528357155053	0.537021182921274	0.99935717060686	0.426114827255528	0.999763342266748
ENSMUSG00000000759	0.443487530977039	0.999940051448475	0.208617936373133	0.987855253447846	0.16473075058447	0.988103572557963	0.290571884850755	0.999763342266748
ENSMUSG00000000766	0.0144160953682864	0.786609447068071	0.215494890052959	0.989942966523981	0.00626328524845692	0.330710682152934	0.0319269662832767	0.650031333168106
ENSMUSG00000000776	0.738874605344481	0.999940051448475	0.82098922599894	0.999528357155053	0.474305617603895	0.99935717060686	0.894395002303662	0.999763342266748
ENSMUSG00000000782	0.700776161500383	0.999940051448475	0.153882358919741	0.949489075038022	0.865475191544385	0.99935717060686	0.708555199168929	0.999763342266748
ENSMUSG00000000787	0.46271316917212	0.999940051448475	0.288298026067599	0.999528357155053	0.238203710151363	0.99935717060686	0.0579572014938654	0.783299708205857
ENSMUSG00000000794	0.612971388481346	0.999940051448475	0.152382341393511	0.947201608892512	0.152614001987001	0.98175271783788	0.0856764820666955	0.874010466817345
ENSMUSG00000000804	0.734824995633138	0.999940051448475	0.963153487280739	0.999528357155053	0.835048777576453	0.99935717060686	0.979822050483272	0.999763342266748
ENSMUSG00000000811	0.727888748452426	0.999940051448475	0.779217227539622	0.999528357155053	0.480668736986292	0.99935717060686	0.426491740453485	0.999763342266748
ENSMUSG00000000823	0.397448089622581	0.999940051448475	0.703517816165272	0.999528357155053	0.994127386004008	0.99935717060686	0.467328443262316	0.999763342266748
ENSMUSG00000000826	0.40091981728	0.999940051448475	0.623019573822772	0.999528357155053	0.320708090703055	0.99935717060686	0.103678041831556	0.904999490507655
ENSMUSG00000000827	0.345740558750231	0.999940051448475	0.205783996885754	0.985348778067367	0.14524647873324	0.974751406661564	0.392133691406753	0.999763342266748
ENSMUSG00000000838	0.58730111217361	0.999940051448475	0.891132612062019	0.999528357155053	0.666436202753222	0.99935717060686	0.421767727716927	0.999763342266748
ENSMUSG00000000861	0.925714419622355	0.999940051448475	0.289979482623233	0.999528357155053	0.569833458828317	0.99935717060686	0.894371523757342	0.999763342266748
ENSMUSG00000000869	0.923142159383425	0.999940051448475	0.728708445083314	0.999528357155053	0.992693470003334	0.99935717060686	0.851211094147408	0.999763342266748
ENSMUSG00000000876	0.616540121817887	0.999940051448475	0.485665194531904	0.999528357155053	0.809623277164888	0.99935717060686	0.921946956387006	0.999763342266748
ENSMUSG00000000881	0.32354090346744	0.999940051448475	0.456019348394156	0.999528357155053	0.730363782347662	0.99935717060686	0.331269718867309	0.999763342266748
ENSMUSG00000000884	0.00785624767059257	0.61199815494231	0.0182846894862787	0.512676182636771	0.0525689379919016	0.774859254537629	0.160545067938546	0.96637974409844
ENSMUSG00000000889	0.000178159038076413	0.0748432679402675	0.00284925816864985	0.238337538401265	0.0722759103236699	0.824389116061677	0.145677062262338	0.955048448974804
ENSMUSG00000000901	0.467877118314901	0.999940051448475	0.0842345234503309	0.846490288101584	0.548077561095243	0.99935717060686	0.276922125690767	0.999763342266748
ENSMUSG00000000902	0.772142824913162	0.999940051448475	0.412617083121755	0.999528357155053	0.554055207479848	0.99935717060686	0.688578333829801	0.999763342266748
ENSMUSG00000000903	0.155335636883215	0.999940051448475	0.35524346217158	0.999528357155053	0.732334679364428	0.99935717060686	0.113385288844618	0.919698812242034
ENSMUSG00000000915	0.00916519861311809	0.652808108245542	0.00647405376300255	0.364404294652763	0.0176744451224808	0.530559145544746	0.00665257919683249	0.331054912085231
ENSMUSG00000000916	0.16045645580034	0.999940051448475	0.0379275867233197	0.694952927767653	0.0710759131399299	0.82105728170392	0.0787876396803171	0.853079960676537
ENSMUSG00000000934	0.944442494353235	0.999940051448475	0.152660408182924	0.947459562420902	0.0847055380415423	0.857125704641356	0.104812691067332	0.904999490507655
ENSMUSG00000000938	0.70477631414955	0.999940051448475	0.24119890596893	0.999528357155053	0.516065794136155	0.99935717060686	0.974466826844629	0.999763342266748
ENSMUSG00000000948	0.463442070773738	0.999940051448475	0.0453781049833251	0.733778564364472	0.133493103367052	0.955055052969257	0.113817016070591	0.920027757896217
ENSMUSG00000000957	0.045904339888442	0.999940051448475	0.148981960157593	0.944689446618101	0.167050585770833	0.990817918486609	0.166252744301188	0.970141274301553
ENSMUSG00000000958	0.81627218412892	0.999940051448475	0.334671496391369	0.999528357155053	0.278214502665512	0.99935717060686	0.940973320722745	0.999763342266748
ENSMUSG00000000959	0.341191715183615	0.999940051448475	0.942142378042666	0.999528357155053	0.168540412834125	0.991244905284832	0.483536999795897	0.999763342266748
ENSMUSG00000000976	0.750228926808281	0.999940051448475	0.345063986933707	0.999528357155053	0.446126791465544	0.99935717060686	0.141834643858359	0.950710027113126
ENSMUSG00000000982	0.580546055287629	0.999940051448475	0.950286546941155	0.999528357155053	0.478790983291645	0.99935717060686	0.843059958324738	0.999763342266748
ENSMUSG00000001014	0.0618589838549443	0.999940051448475	0.0616950447755002	0.781723374443094	0.154369156386836	0.98175271783788	0.152759958509983	0.959526532101788
ENSMUSG00000001016	0.783126375708295	0.999940051448475	0.492223569213778	0.999528357155053	0.248077623416546	0.99935717060686	0.265862027779299	0.999763342266748
ENSMUSG00000001017	0.932505155960986	0.999940051448475	0.905363972049004	0.999528357155053	0.587405238975141	0.99935717060686	0.845203745508267	0.999763342266748
ENSMUSG00000001018	0.289576570423506	0.999940051448475	0.285393977657546	0.999528357155053	0.611584846603938	0.99935717060686	0.776107467316791	0.999763342266748
ENSMUSG00000001021	0.273219884103944	0.999940051448475	0.0940658746507548	0.873883062145317	0.0669242384483225	0.808916276456959	0.129574574758093	0.94486249912081
ENSMUSG00000001025	0.22328397914536	0.999940051448475	0.577594414654602	0.999528357155053	0.483648271158313	0.99935717060686	0.840010426580562	0.999763342266748
ENSMUSG00000001027	0.910869305758262	0.999940051448475	0.923023936266975	0.999528357155053	0.0624000333488234	0.796725233971978	0.1701422502432	0.972046615010585
ENSMUSG00000001029	0.029562876774368	0.941762969164957	0.29478030256073	0.999528357155053	0.22389930224076	0.99935717060686	0.208964576215945	0.996260896664378
ENSMUSG00000001034	0.407550401634823	0.999940051448475	0.313044339495186	0.999528357155053	0.51880561450271	0.99935717060686	0.232170722038721	0.999763342266748
ENSMUSG00000001036	0.698313538436985	0.999940051448475	0.96827181270463	0.999528357155053	0.865949412696969	0.99935717060686	0.468476393654741	0.999763342266748
ENSMUSG00000001039	0.723470731547216	0.999940051448475	0.741037036901852	0.999528357155053	0.882070196012809	0.99935717060686	0.427193729934268	0.999763342266748
ENSMUSG00000001052	0.439840368396547	0.999940051448475	0.197544776928582	0.982191130794892	0.568273845810109	0.99935717060686	0.186886596941686	0.978835938772012
ENSMUSG00000001053	0.344525774682643	0.999940051448475	0.163024404729738	0.951776497358995	0.726876071237138	0.99935717060686	0.172956415999832	0.973338705733454
ENSMUSG00000001054	0.736203751951435	0.999940051448475	0.389462144149405	0.999528357155053	0.850342283589191	0.99935717060686	0.869748769624738	0.999763342266748
ENSMUSG00000001056	0.837676007122597	0.999940051448475	0.385473130806192	0.999528357155053	0.835024172631181	0.99935717060686	0.53158727438019	0.999763342266748
ENSMUSG00000001062	0.256417775085933	0.999940051448475	0.31739374127443	0.999528357155053	0.288153389237897	0.99935717060686	0.435838432585132	0.999763342266748
ENSMUSG00000001065	0.258707298001914	0.999940051448475	0.658201511643983	0.999528357155053	0.492958947404638	0.99935717060686	0.307458613691802	0.999763342266748
ENSMUSG00000001082	0.848949141929499	0.999940051448475	0.227382920545773	0.996009678215275	0.31076416920098	0.99935717060686	0.28355702905824	0.999763342266748
ENSMUSG00000001089	0.0610091486303824	0.999940051448475	0.0241136229318305	0.583868190357887	0.0172065749855233	0.527388918682359	5.97215352914689e-05	0.0164374309603458
ENSMUSG00000001095	0.441976892521285	0.999940051448475	0.214853338569461	0.989942966523981	0.774391208560489	0.99935717060686	0.568938675443294	0.999763342266748
ENSMUSG00000001098	0.270258738726387	0.999940051448475	0.265521961210498	0.999528357155053	0.297200133205522	0.99935717060686	0.64485271502443	0.999763342266748
ENSMUSG00000001100	0.56554577465794	0.999940051448475	0.705898545173789	0.999528357155053	0.922945571251772	0.99935717060686	0.675046861667475	0.999763342266748
ENSMUSG00000001103	0.843663624990545	0.999940051448475	0.300823107682781	0.999528357155053	0.220821637118763	0.99935717060686	0.50504337100056	0.999763342266748
ENSMUSG00000001105	0.959653683518318	0.999940051448475	0.766034041610048	0.999528357155053	0.914826727547582	0.99935717060686	0.583172563654583	0.999763342266748
ENSMUSG00000001119	0.501518988343791	0.999940051448475	0.343720267852681	0.999528357155053	0.579368431450864	0.99935717060686	0.558530795429798	0.999763342266748
ENSMUSG00000001120	0.396613766718826	0.999940051448475	0.0856771059491785	0.848298606198491	0.475680590413012	0.99935717060686	0.574695791180047	0.999763342266748
ENSMUSG00000001123	0.774451114259384	0.999940051448475	0.451686564985086	0.999528357155053	0.537195913259412	0.99935717060686	0.132135252810012	0.946893190990462
ENSMUSG00000001127	0.576565966417213	0.999940051448475	0.8634245260587	0.999528357155053	0.604412064792625	0.99935717060686	0.955325861454269	0.999763342266748
ENSMUSG00000001128	0.527828497799907	0.999940051448475	0.906759152039382	0.999528357155053	0.253646097190006	0.99935717060686	0.555989616954734	0.999763342266748
ENSMUSG00000001131	0.425484875000334	0.999940051448475	0.886958430235151	0.999528357155053	0.710587825239456	0.99935717060686	0.493963743275771	0.999763342266748
ENSMUSG00000001134	0.848195809842296	0.999940051448475	0.579481162906265	0.999528357155053	0.780710266910154	0.99935717060686	0.807958583248686	0.999763342266748
ENSMUSG00000001138	0.408852475093284	0.999940051448475	0.648928207647466	0.999528357155053	0.553906397583445	0.99935717060686	0.510373926683771	0.999763342266748
ENSMUSG00000001143	0.399308754736992	0.999940051448475	0.388959407711962	0.999528357155053	0.290419635891664	0.99935717060686	0.968458029223335	0.999763342266748
ENSMUSG00000001150	0.51564676242892	0.999940051448475	0.700432210038179	0.999528357155053	0.0888516457088943	0.865221715200767	0.0781451404978879	0.850795796063335
ENSMUSG00000001151	0.681874830731277	0.999940051448475	0.637070773982802	0.999528357155053	0.174506418247357	0.99519877055526	0.872447432588178	0.999763342266748
ENSMUSG00000001156	0.592147873415269	0.999940051448475	0.0482806125293942	0.743634558327929	0.0285662882127837	0.648776188985452	0.0291254819146264	0.620189764815792
ENSMUSG00000001157	0.42214298264437	0.999940051448475	0.105814834470891	0.898804130265947	0.378502073960568	0.99935717060686	0.107137731950242	0.910426222295307
ENSMUSG00000001158	0.835856277888262	0.999940051448475	0.828886482684577	0.999528357155053	0.807939448673809	0.99935717060686	0.530877300006722	0.999763342266748
ENSMUSG00000001166	0.154131387930762	0.999940051448475	0.0143978369918672	0.477458367817682	0.0673886601981513	0.811156572726712	0.17818283510515	0.977564110447433
ENSMUSG00000001168	0.660988343550785	0.999940051448475	0.532681869054366	0.999528357155053	0.970002727621762	0.99935717060686	0.32900625612638	0.999763342266748
ENSMUSG00000001173	0.517773708508013	0.999940051448475	0.758043494322359	0.999528357155053	0.773636930430803	0.99935717060686	0.200361358070552	0.991875438358967
ENSMUSG00000001175	0.792498548898816	0.999940051448475	0.891041887899823	0.999528357155053	0.733490439160813	0.99935717060686	0.531311877298339	0.999763342266748
ENSMUSG00000001211	0.394686063121947	0.999940051448475	0.948694507156832	0.999528357155053	0.463009032852428	0.99935717060686	0.883039462895951	0.999763342266748
ENSMUSG00000001225	0.704060867998885	0.999940051448475	0.904023519158184	0.999528357155053	0.9584212073903	0.99935717060686	0.683427578804361	0.999763342266748
ENSMUSG00000001228	0.624563582294625	0.999940051448475	0.69323061505529	0.999528357155053	0.232581675115117	0.99935717060686	0.275063473602769	0.999763342266748
ENSMUSG00000001229	0.885525591550838	0.999940051448475	0.831764304940623	0.999528357155053	0.979882564759842	0.99935717060686	0.682745724113762	0.999763342266748
ENSMUSG00000001240	0.144493520570768	0.999940051448475	0.333261564998023	0.999528357155053	0.396468381752798	0.99935717060686	0.870667827580328	0.999763342266748
ENSMUSG00000001247	0.763959733035814	0.999940051448475	0.602481044651551	0.999528357155053	0.609165069296113	0.99935717060686	0.55735716165049	0.999763342266748
ENSMUSG00000001248	0.844162245635034	0.999940051448475	0.999420842201925	0.999885792718139	0.738550194274151	0.99935717060686	0.955712804111479	0.999763342266748
ENSMUSG00000001249	0.326903635667071	0.999940051448475	0.0593069158693385	0.776449913671112	0.100044487547013	0.889823886103618	0.092169420011131	0.883990187425183
ENSMUSG00000001260	0.784345584894285	0.999940051448475	0.578737140187993	0.999528357155053	0.409077524976826	0.99935717060686	0.614798542058477	0.999763342266748
ENSMUSG00000001270	0.435033625813884	0.999940051448475	0.320240494673387	0.999528357155053	0.186523104267693	0.99935717060686	0.403605530346976	0.999763342266748
ENSMUSG00000001280	0.615205337333772	0.999940051448475	0.165010645312063	0.955560374406732	0.361106811442642	0.99935717060686	0.898053292082755	0.999763342266748
ENSMUSG00000001281	0.888991355896851	0.999940051448475	0.447163801196649	0.999528357155053	0.31578580536573	0.99935717060686	0.954503184983239	0.999763342266748
ENSMUSG00000001285	0.855657682798312	0.999940051448475	0.921413318396957	0.999528357155053	0.927035708026419	0.99935717060686	0.758509678101715	0.999763342266748
ENSMUSG00000001288	0.000763514102828443	0.170050906470924	0.0306234963911557	0.641715680000353	0.000236124475664317	0.0476570474751169	0.000238414603314083	0.0435920184535718
ENSMUSG00000001289	0.569282134970657	0.999940051448475	0.970503694152347	0.999528357155053	0.435823957343901	0.99935717060686	0.891564815885947	0.999763342266748
ENSMUSG00000001300	0.838803844951844	0.999940051448475	0.522845261954959	0.999528357155053	0.57240633973238	0.99935717060686	0.306488353651456	0.999763342266748
ENSMUSG00000001305	0.954917343822893	0.999940051448475	0.47784302159895	0.999528357155053	0.450075629448159	0.99935717060686	0.909158996954758	0.999763342266748
ENSMUSG00000001313	0.844651143895893	0.999940051448475	0.501212157580817	0.999528357155053	0.813447400215892	0.99935717060686	0.672693301577755	0.999763342266748
ENSMUSG00000001323	0.54999768656602	0.999940051448475	0.756075471675854	0.999528357155053	0.528874432870098	0.99935717060686	0.591893712229056	0.999763342266748
ENSMUSG00000001334	0.344487599807292	0.999940051448475	0.645874445806835	0.999528357155053	0.924221517969056	0.99935717060686	0.985355499791481	0.999763342266748
ENSMUSG00000001348	0.639405005678819	0.999940051448475	0.21499048679103	0.989942966523981	0.145653112587371	0.974751406661564	0.183049756910916	0.978475551866962
ENSMUSG00000001349	0.786959317241753	0.999940051448475	0.389857312401111	0.999528357155053	0.429908720805277	0.99935717060686	0.539655735455218	0.999763342266748
ENSMUSG00000001366	0.346981120527647	0.999940051448475	0.54347555502068	0.999528357155053	0.946481628176335	0.99935717060686	0.417537671229956	0.999763342266748
ENSMUSG00000001376	0.868046197005149	0.999940051448475	0.925934937749985	0.999528357155053	0.981087595400276	0.99935717060686	0.663985428024493	0.999763342266748
ENSMUSG00000001380	0.86326362049632	0.999940051448475	0.800205728390929	0.999528357155053	0.771378606454193	0.99935717060686	0.904042584056165	0.999763342266748
ENSMUSG00000001383	0.857249750640068	0.999940051448475	0.710807793185138	0.999528357155053	0.662356962147498	0.99935717060686	0.970647564716661	0.999763342266748
ENSMUSG00000001403	0.431101366754796	0.999940051448475	0.462350818475077	0.999528357155053	0.634345986699084	0.99935717060686	0.92031887394516	0.999763342266748
ENSMUSG00000001415	0.594296826296377	0.999940051448475	0.689663122642634	0.999528357155053	0.786387189245734	0.99935717060686	0.613767612805633	0.999763342266748
ENSMUSG00000001416	0.867483421247493	0.999940051448475	0.868041823307434	0.999528357155053	0.883953453502571	0.99935717060686	0.878410142976287	0.999763342266748
ENSMUSG00000001418	0.337157148020334	0.999940051448475	0.545012654118431	0.999528357155053	0.514678046468252	0.99935717060686	0.965226333674243	0.999763342266748
ENSMUSG00000001419	0.0323572220690955	0.972199338016731	0.109803664500541	0.899956514708997	0.0253588696115467	0.615930334715184	0.0200869698471223	0.540191683681236
ENSMUSG00000001420	0.634174494619615	0.999940051448475	0.57846623720298	0.999528357155053	0.860206748219114	0.99935717060686	0.922433389093557	0.999763342266748
ENSMUSG00000001424	0.358813972507197	0.999940051448475	0.111983652267716	0.899956514708997	0.322421301032484	0.99935717060686	0.203825223297587	0.993014849645277
ENSMUSG00000001435	0.235996320012307	0.999940051448475	0.0855184325607878	0.847751548540181	0.0480834731470033	0.755387439550884	0.447005491920877	0.999763342266748
ENSMUSG00000001436	0.647820814543168	0.999940051448475	0.608773890223935	0.999528357155053	0.0886041186379945	0.864843016823397	0.61065592980702	0.999763342266748
ENSMUSG00000001440	0.919778019816798	0.999940051448475	0.962453283994157	0.999528357155053	0.501518472103154	0.99935717060686	0.774392754310771	0.999763342266748
ENSMUSG00000001441	0.562756166969985	0.999940051448475	0.355019191511815	0.999528357155053	0.398139438006955	0.99935717060686	0.170969020051055	0.972046615010585
ENSMUSG00000001445	0.43130678655527	0.999940051448475	0.552170629552637	0.999528357155053	0.340453744291912	0.99935717060686	0.0624717890761974	0.794942016329636
ENSMUSG00000001467	0.998462804349445	0.999940051448475	0.803556887905885	0.999528357155053	0.491788305359956	0.99935717060686	0.705729575368921	0.999763342266748
ENSMUSG00000001472	0.400660056654447	0.999940051448475	0.223282710718159	0.991277093953885	0.30291343479811	0.99935717060686	0.391103011189654	0.999763342266748
ENSMUSG00000001473	0.588796615912486	0.999940051448475	0.607122219062678	0.999528357155053	0.772076200275015	0.99935717060686	0.49056910910177	0.999763342266748
ENSMUSG00000001482	0.627458596901959	0.999940051448475	0.459420045047008	0.999528357155053	0.258618857448929	0.99935717060686	0.597934027512773	0.999763342266748
ENSMUSG00000001493	0.877239680901335	0.999940051448475	0.836479689303544	0.999528357155053	0.681088280532169	0.99935717060686	0.646431959040802	0.999763342266748
ENSMUSG00000001497	0.144833685598344	0.999940051448475	0.997905458165949	0.999885792718139	0.252783365522304	0.99935717060686	0.850729800633688	0.999763342266748
ENSMUSG00000001504	0.790994865278279	0.999940051448475	0.627539253652903	0.999528357155053	0.483157298400202	0.99935717060686	0.824812143115477	0.999763342266748
ENSMUSG00000001506	0.0339335091447689	0.987461419542383	0.254745381696531	0.999528357155053	0.28681300592487	0.99935717060686	0.258070179979123	0.999763342266748
ENSMUSG00000001507	0.535799159130829	0.999940051448475	0.718861557004175	0.999528357155053	0.376212644588339	0.99935717060686	0.689701707461575	0.999763342266748
ENSMUSG00000001517	0.62796362746951	0.999940051448475	0.194942772279862	0.97943113911698	0.778623414629891	0.99935717060686	0.9035625919088	0.999763342266748
ENSMUSG00000001518	0.714610638502995	0.999940051448475	0.889673198306846	0.999528357155053	0.951211367412919	0.99935717060686	0.752867923812965	0.999763342266748
ENSMUSG00000001520	0.497976069713438	0.999940051448475	0.43544271676097	0.999528357155053	0.726621361243033	0.99935717060686	0.898742262889628	0.999763342266748
ENSMUSG00000001521	0.89224581541513	0.999940051448475	0.867442770749874	0.999528357155053	0.920892743024121	0.99935717060686	0.893717066869792	0.999763342266748
ENSMUSG00000001524	0.099720216554901	0.999940051448475	0.321322219737749	0.999528357155053	0.0404388816210435	0.711452462034462	0.75050063126685	0.999763342266748
ENSMUSG00000001525	0.87625152060463	0.999940051448475	0.610734687899998	0.999528357155053	0.835749187494506	0.99935717060686	0.295285517372781	0.999763342266748
ENSMUSG00000001542	0.113352955711293	0.999940051448475	0.761746834372591	0.999528357155053	0.933151487202081	0.99935717060686	0.788286275232793	0.999763342266748
ENSMUSG00000001552	0.206942715758448	0.999940051448475	0.919245277175858	0.999528357155053	0.308700637161529	0.99935717060686	0.78001847345567	0.999763342266748
ENSMUSG00000001555	0.125365046609513	0.999940051448475	0.0916106113434989	0.87081069984864	0.0902079034642614	0.868159358903306	0.07426869076764	0.840435801031244
ENSMUSG00000001558	0.557918033202431	0.999940051448475	0.726305475446997	0.999528357155053	0.90827571149617	0.99935717060686	0.176936573255336	0.977564110447433
ENSMUSG00000001569	0.641843856672515	0.999940051448475	0.448865182296809	0.999528357155053	0.89616430355529	0.99935717060686	0.598837011495778	0.999763342266748
ENSMUSG00000001576	0.875471865172479	0.999940051448475	0.723222320439443	0.999528357155053	0.563470785391768	0.99935717060686	0.328941646687824	0.999763342266748
ENSMUSG00000001583	0.759715172816362	0.999940051448475	0.805399189927101	0.999528357155053	0.134153010968638	0.955055052969257	0.54519714127203	0.999763342266748
ENSMUSG00000001588	0.569566772959968	0.999940051448475	0.498812674880136	0.999528357155053	0.923674093073286	0.99935717060686	0.727338559914109	0.999763342266748
ENSMUSG00000001604	0.512540555778897	0.999940051448475	0.590577685964493	0.999528357155053	0.229533692307621	0.99935717060686	0.273567592243108	0.999763342266748
ENSMUSG00000001627	0.279720777936919	0.999940051448475	0.204667055531361	0.984526274927622	0.131568295399554	0.954082056919299	0.185672178752779	0.978835938772012
ENSMUSG00000001630	0.754136812518437	0.999940051448475	0.991344033712925	0.999528357155053	0.624597625177715	0.99935717060686	0.876123857594036	0.999763342266748
ENSMUSG00000001632	0.329653039141785	0.999940051448475	0.242844759752215	0.999528357155053	0.548298150151679	0.99935717060686	0.877716937026083	0.999763342266748
ENSMUSG00000001642	0.558357479819893	0.999940051448475	0.711840319623565	0.999528357155053	0.877488653282104	0.99935717060686	0.642653112281714	0.999763342266748
ENSMUSG00000001657	0.969990761083837	0.999940051448475	0.823076070327571	0.999528357155053	0.693970015007997	0.99935717060686	0.599904776276783	0.999763342266748
ENSMUSG00000001661	0.699555923164988	0.999940051448475	0.626148829020934	0.999528357155053	0.729075175983417	0.99935717060686	0.573568203865093	0.999763342266748
ENSMUSG00000001663	0.748683596409914	0.999940051448475	0.257489966017998	0.999528357155053	0.272969485421152	0.99935717060686	0.151770536538114	0.959526532101788
ENSMUSG00000001665	0.367169104593602	0.999940051448475	0.119215248237472	0.90734936002054	0.599454136304055	0.99935717060686	0.096149088089198	0.893458721231005
ENSMUSG00000001666	0.754468996126258	0.999940051448475	0.656960567656628	0.999528357155053	0.902392002243077	0.99935717060686	0.14686961729442	0.955570684638812
ENSMUSG00000001674	0.98001111700584	0.999940051448475	0.892221810655255	0.999528357155053	0.826044011982861	0.99935717060686	0.502579307177864	0.999763342266748
ENSMUSG00000001687	0.980903062724884	0.999940051448475	0.867254111739986	0.999528357155053	0.590630333661356	0.99935717060686	0.810557300187759	0.999763342266748
ENSMUSG00000001700	0.00357239055222095	0.442460416506744	0.473096935785165	0.999528357155053	0.128684988005	0.949133474331718	0.845917359146182	0.999763342266748
ENSMUSG00000001707	0.815081586202455	0.999940051448475	0.638181082082375	0.999528357155053	0.862079427729525	0.99935717060686	0.75755253450971	0.999763342266748
ENSMUSG00000001729	0.267923146046733	0.999940051448475	0.18534807729431	0.973275711677557	0.0499760228531677	0.767542737200769	0.249950503067766	0.999763342266748
ENSMUSG00000001739	0.1692235421714	0.999940051448475	0.375124922995023	0.999528357155053	0.662246922878713	0.99935717060686	0.413729627403934	0.999763342266748
ENSMUSG00000001741	0.449635694332654	0.999940051448475	0.960478978782937	0.999528357155053	0.826343590700743	0.99935717060686	0.789638564998089	0.999763342266748
ENSMUSG00000001750	0.529676768655449	0.999940051448475	0.184299944393018	0.972712608908191	0.334299539939127	0.99935717060686	0.13878560454624	0.948945409905862
ENSMUSG00000001751	0.787202291288821	0.999940051448475	0.503878664236129	0.999528357155053	0.914898136947513	0.99935717060686	0.418736797652672	0.999763342266748
ENSMUSG00000001755	0.908210858553394	0.999940051448475	0.076650288110347	0.8339037571084	0.834148429228905	0.99935717060686	0.832632080794264	0.999763342266748
ENSMUSG00000001761	0.531992649055295	0.999940051448475	0.342140788349288	0.999528357155053	0.73091954976333	0.99935717060686	0.392114053662941	0.999763342266748
ENSMUSG00000001763	0.978378885641014	0.999940051448475	0.915723919985603	0.999528357155053	0.522119004873281	0.99935717060686	0.944195257260391	0.999763342266748
ENSMUSG00000001767	0.753387088462684	0.999940051448475	0.435310843875487	0.999528357155053	0.16741207161289	0.991038752514565	0.948196504802759	0.999763342266748
ENSMUSG00000001768	0.69802000304817	0.999940051448475	0.942360740234453	0.999528357155053	0.572410147835768	0.99935717060686	0.729834781556546	0.999763342266748
ENSMUSG00000001774	0.726452880399604	0.999940051448475	0.379200292693441	0.999528357155053	0.470088888927405	0.99935717060686	0.619354240417957	0.999763342266748
ENSMUSG00000001783	0.75323305132858	0.999940051448475	0.782974851067576	0.999528357155053	0.766069539219234	0.99935717060686	0.508166012992343	0.999763342266748
ENSMUSG00000001785	0.762552786083779	0.999940051448475	0.466582118415809	0.999528357155053	0.516198956817487	0.99935717060686	0.910331729373838	0.999763342266748
ENSMUSG00000001786	0.912144539109636	0.999940051448475	0.315574002391276	0.999528357155053	0.199739413424473	0.99935717060686	0.60406417459741	0.999763342266748
ENSMUSG00000001794	0.913558932291363	0.999940051448475	0.769018423183192	0.999528357155053	0.636726186636431	0.99935717060686	0.565423491942838	0.999763342266748
ENSMUSG00000001802	0.461078064224963	0.999940051448475	0.481978032759875	0.999528357155053	0.320911192681879	0.99935717060686	0.575757926967533	0.999763342266748
ENSMUSG00000001827	0.0461793505522665	0.999940051448475	0.42038107897529	0.999528357155053	0.173399276323662	0.99519877055526	0.867303725353362	0.999763342266748
ENSMUSG00000001829	0.555633385571894	0.999940051448475	0.259241250443929	0.999528357155053	0.419464231295856	0.99935717060686	0.289886582045852	0.999763342266748
ENSMUSG00000001833	0.841208503542941	0.999940051448475	0.769964734176999	0.999528357155053	0.878014469196905	0.99935717060686	0.843445766071014	0.999763342266748
ENSMUSG00000001844	0.0468669588434305	0.999940051448475	0.182720529644021	0.970457181663043	0.0239906223510927	0.606731688824495	0.089566545547589	0.87950735223595
ENSMUSG00000001847	0.929263380603775	0.999940051448475	0.378098613750042	0.999528357155053	0.644216029112726	0.99935717060686	0.326714440810688	0.999763342266748
ENSMUSG00000001855	0.986915300753147	0.999940051448475	0.244285911795839	0.999528357155053	0.465222221001724	0.99935717060686	0.272362909200875	0.999763342266748
ENSMUSG00000001864	0.248741816354944	0.999940051448475	0.0107210036730745	0.441090609562491	0.0189288070025687	0.545037546450813	0.0689402789811707	0.819709109123317
ENSMUSG00000001865	0.109214001737016	0.999940051448475	0.804306138621824	0.999528357155053	0.917852483668824	0.99935717060686	0.837697165663028	0.999763342266748
ENSMUSG00000001870	0.89409887387838	0.999940051448475	0.459813817159123	0.999528357155053	0.502973358042037	0.99935717060686	0.763607320291025	0.999763342266748
ENSMUSG00000001891	0.393096379607795	0.999940051448475	0.158770468009367	0.951776497358995	0.0269305453511197	0.633194772413545	0.00215405664450543	0.181217127670204
ENSMUSG00000001909	0.630429563858088	0.999940051448475	0.121616394817052	0.909300648911256	0.498633994530253	0.99935717060686	0.18442920805372	0.978835938772012
ENSMUSG00000001910	0.99115871845461	0.999940051448475	0.857116629507332	0.999528357155053	0.893951751352308	0.99935717060686	0.239181952150062	0.999763342266748
ENSMUSG00000001911	0.734072356079154	0.999940051448475	0.514610388302528	0.999528357155053	0.125794890696594	0.943812654547475	0.0340707278168259	0.656501993040897
ENSMUSG00000001918	0.586314321917954	0.999940051448475	0.547474888275591	0.999528357155053	0.440020059492651	0.99935717060686	0.854587688732676	0.999763342266748
ENSMUSG00000001924	0.73871743621384	0.999940051448475	0.46424853730655	0.999528357155053	0.359715138579521	0.99935717060686	0.460472042083963	0.999763342266748
ENSMUSG00000001930	0.218599504062682	0.999940051448475	0.90273291302989	0.999528357155053	0.801311070627152	0.99935717060686	0.896097852210587	0.999763342266748
ENSMUSG00000001942	0.993289844421621	0.999940051448475	0.989056025596062	0.999528357155053	0.589369612142955	0.99935717060686	0.961757655106558	0.999763342266748
ENSMUSG00000001943	0.5960537631544	0.999940051448475	0.636612706463765	0.999528357155053	0.56627433409653	0.99935717060686	0.729577772463347	0.999763342266748
ENSMUSG00000001946	0.583717893556116	0.999940051448475	0.10239281858125	0.890588192378834	0.892312542772697	0.99935717060686	0.922780897004839	0.999763342266748
ENSMUSG00000001948	0.436246006207337	0.999940051448475	0.77387046574763	0.999528357155053	0.481658626651003	0.99935717060686	0.60172859238075	0.999763342266748
ENSMUSG00000001962	0.920256512148287	0.999940051448475	0.525898278406639	0.999528357155053	0.492455596529928	0.99935717060686	0.564513645271873	0.999763342266748
ENSMUSG00000001964	0.712938249211063	0.999940051448475	0.34528061713248	0.999528357155053	0.317834845825143	0.99935717060686	0.471916354858749	0.999763342266748
ENSMUSG00000001983	0.795782802100483	0.999940051448475	0.993416621814374	0.999528357155053	0.496715643063617	0.99935717060686	0.48943430438256	0.999763342266748
ENSMUSG00000001985	0.616414841883315	0.999940051448475	0.2858409034823	0.999528357155053	0.0435617866447272	0.732098085999446	0.0724210608371646	0.832244912527705
ENSMUSG00000001986	0.94055619342056	0.999940051448475	0.668849670304333	0.999528357155053	0.285124475634859	0.99935717060686	0.134789762827755	0.948945409905862
ENSMUSG00000001995	0.968723791027192	0.999940051448475	0.618076374784071	0.999528357155053	0.894755964750926	0.99935717060686	0.590802586556076	0.999763342266748
ENSMUSG00000001998	0.406778277981246	0.999940051448475	0.289100789358936	0.999528357155053	0.659023696648671	0.99935717060686	0.681260592285496	0.999763342266748
ENSMUSG00000001999	0.998557294777245	0.999940051448475	0.942877283534549	0.999528357155053	0.883152728461486	0.99935717060686	0.630113205969493	0.999763342266748
ENSMUSG00000002006	0.731393166332068	0.999940051448475	0.644670537824855	0.999528357155053	0.439554984551827	0.99935717060686	0.877207142842741	0.999763342266748
ENSMUSG00000002007	0.964986091134555	0.999940051448475	0.20326617593824	0.983998643413425	0.326815401615073	0.99935717060686	0.696566338114997	0.999763342266748
ENSMUSG00000002010	0.752175808628459	0.999940051448475	0.533722911333712	0.999528357155053	0.696954711592874	0.99935717060686	0.677129930328502	0.999763342266748
ENSMUSG00000002012	0.348419882420912	0.999940051448475	0.816915689291687	0.999528357155053	0.720776210147366	0.99935717060686	0.481518041383783	0.999763342266748
ENSMUSG00000002014	0.396607637857851	0.999940051448475	0.783201455727911	0.999528357155053	0.832444914603128	0.99935717060686	0.772621164727493	0.999763342266748
ENSMUSG00000002015	0.701767581055602	0.999940051448475	0.427246457495516	0.999528357155053	0.611610445648881	0.99935717060686	0.296895386977929	0.999763342266748
ENSMUSG00000002017	0.756198820237177	0.999940051448475	0.723866023907005	0.999528357155053	0.577682103261398	0.99935717060686	0.80901878570217	0.999763342266748
ENSMUSG00000002020	0.938550041646887	0.999940051448475	0.30092109279197	0.999528357155053	0.630993427865846	0.99935717060686	0.439008900387843	0.999763342266748
ENSMUSG00000002028	0.200525255058257	0.999940051448475	0.0704062538143059	0.811989738700273	0.0898737343860572	0.867345785401786	0.0639297834209425	0.797543006452634
ENSMUSG00000002031	0.801655172182927	0.999940051448475	0.18823023176108	0.973657380840209	0.198446357389266	0.99935717060686	0.393331598361275	0.999763342266748
ENSMUSG00000002032	0.10054336764812	0.999940051448475	0.797368695785179	0.999528357155053	0.663383817098764	0.99935717060686	0.638983029222576	0.999763342266748
ENSMUSG00000002033	0.485315630818263	0.999940051448475	0.721275129449423	0.999528357155053	0.0557284249046273	0.785260071752117	0.37484992577208	0.999763342266748
ENSMUSG00000002043	0.931633528094518	0.999940051448475	0.574309090942736	0.999528357155053	0.996494595820556	0.99935717060686	0.874912375555773	0.999763342266748
ENSMUSG00000002052	0.969202836865722	0.999940051448475	0.899976278104849	0.999528357155053	0.55981801671182	0.99935717060686	0.781058400308409	0.999763342266748
ENSMUSG00000002055	0.765498450943205	0.999940051448475	0.302657870518014	0.999528357155053	0.0775406991468323	0.84625196134816	0.0606101003877714	0.793913970649222
ENSMUSG00000002058	0.462635219635535	0.999940051448475	0.531807445444979	0.999528357155053	0.674681891129977	0.99935717060686	0.189183621353382	0.97911473964748
ENSMUSG00000002059	0.193970897393848	0.999940051448475	0.366322901485259	0.999528357155053	0.57749382928777	0.99935717060686	0.435597530238581	0.999763342266748
ENSMUSG00000002064	0.920742251982291	0.999940051448475	0.683131706138562	0.999528357155053	0.599977582382817	0.99935717060686	0.444234415505919	0.999763342266748
ENSMUSG00000002068	0.33327896896189	0.999940051448475	0.722713451731489	0.999528357155053	0.520005206746234	0.99935717060686	0.969932435257936	0.999763342266748
ENSMUSG00000002076	0.469856123752299	0.999940051448475	0.258688663557257	0.999528357155053	0.475959425040229	0.99935717060686	0.8668116197801	0.999763342266748
ENSMUSG00000002083	0.502602784377801	0.999940051448475	0.210725855728742	0.987855253447846	0.563269515359798	0.99935717060686	0.580333145219507	0.999763342266748
ENSMUSG00000002100	0.266345404242755	0.999940051448475	0.37051219990668	0.999528357155053	0.837681132216046	0.99935717060686	0.479562149377296	0.999763342266748
ENSMUSG00000002102	0.317444273781394	0.999940051448475	0.351452791647319	0.999528357155053	0.188214723823897	0.99935717060686	0.601349987339183	0.999763342266748
ENSMUSG00000002103	0.22731766364861	0.999940051448475	0.310820175194576	0.999528357155053	0.170780738488445	0.993062010444376	0.110363892085692	0.915049115859262
ENSMUSG00000002104	0.403827948126388	0.999940051448475	0.267243595807852	0.999528357155053	0.231520823671097	0.99935717060686	0.224404173747828	0.999763342266748
ENSMUSG00000002105	0.0376744983911495	0.999940051448475	0.0796672515681679	0.837885476692882	0.0549445570930257	0.785260071752117	0.00199711602731155	0.172840923222584
ENSMUSG00000002107	0.440493443147305	0.999940051448475	0.408471977608904	0.999528357155053	0.856161377356348	0.99935717060686	0.235281631272116	0.999763342266748
ENSMUSG00000002109	0.902096648001626	0.999940051448475	0.714035576479819	0.999528357155053	0.645461387017713	0.99935717060686	0.575810836103482	0.999763342266748
ENSMUSG00000002129	0.904325442485803	0.999940051448475	0.399314676655264	0.999528357155053	0.542220943688896	0.99935717060686	0.613688297537769	0.999763342266748
ENSMUSG00000002147	0.390577253985265	0.999940051448475	0.653281709319869	0.999528357155053	0.132512466305151	0.955055052969257	0.77061215672615	0.999763342266748
ENSMUSG00000002204	0.00468810911425836	0.486969712008167	0.527576218811347	0.999528357155053	0.339053182745319	0.99935717060686	0.474120538396709	0.999763342266748
ENSMUSG00000002205	0.738912748880388	0.999940051448475	0.208649310547252	0.987855253447846	0.134500465013429	0.955060701724676	0.818567920139859	0.999763342266748
ENSMUSG00000002210	0.428851707766914	0.999940051448475	0.0981286365554693	0.880033850190758	0.958159510994775	0.99935717060686	0.118169580484464	0.929267240677475
ENSMUSG00000002221	0.921347161776996	0.999940051448475	0.942238156840614	0.999528357155053	0.837848116011935	0.99935717060686	0.243418137918166	0.999763342266748
ENSMUSG00000002222	0.924125706439823	0.999940051448475	0.761473651512865	0.999528357155053	0.352746590440481	0.99935717060686	0.879746554167775	0.999763342266748
ENSMUSG00000002227	0.973948790667962	0.999940051448475	0.813794535263921	0.999528357155053	0.528832781615477	0.99935717060686	0.942243420307566	0.999763342266748
ENSMUSG00000002233	0.501302095797207	0.999940051448475	0.361506131332292	0.999528357155053	0.699037157006485	0.99935717060686	0.735736336822232	0.999763342266748
ENSMUSG00000002249	0.718362348736103	0.999940051448475	0.628037585433642	0.999528357155053	0.520962889600769	0.99935717060686	0.890067303683164	0.999763342266748
ENSMUSG00000002250	0.599072379592863	0.999940051448475	0.563586990341507	0.999528357155053	0.603422148769032	0.99935717060686	0.41386810038124	0.999763342266748
ENSMUSG00000002257	0.553452403900433	0.999940051448475	0.696552375704206	0.999528357155053	0.323913785240212	0.99935717060686	0.581739062375032	0.999763342266748
ENSMUSG00000002265	0.527665558296396	0.999940051448475	0.837377310587484	0.999528357155053	0.655467215894015	0.99935717060686	0.387316415006817	0.999763342266748
ENSMUSG00000002266	0.234190023464894	0.999940051448475	0.837975912490099	0.999528357155053	0.502175202474002	0.99935717060686	0.237785017567676	0.999763342266748
ENSMUSG00000002274	0.533135195287199	0.999940051448475	0.371560009523905	0.999528357155053	0.38390989807224	0.99935717060686	0.768766010515534	0.999763342266748
ENSMUSG00000002279	0.727596935748394	0.999940051448475	0.472460215381801	0.999528357155053	0.654964180243797	0.99935717060686	0.598732233905359	0.999763342266748
ENSMUSG00000002280	0.00387248180043337	0.452717720539861	0.0019658428830371	0.195572738082341	0.00198955276064071	0.1818995374408	0.0051069221658322	0.291932622474521
ENSMUSG00000002289	0.752057958892727	0.999940051448475	0.710906878558742	0.999528357155053	0.2104477358787	0.99935717060686	0.779859783188874	0.999763342266748
ENSMUSG00000002297	0.297018849272617	0.999940051448475	0.253614938577568	0.999528357155053	0.200636632962558	0.99935717060686	0.16291951430821	0.968567373863261
ENSMUSG00000002307	0.521205437307615	0.999940051448475	0.045658660436829	0.733778564364472	0.128806090729829	0.949133474331718	0.189874918219452	0.979153960388477
ENSMUSG00000002308	0.948131281063208	0.999940051448475	0.459188534644377	0.999528357155053	0.813987646008664	0.99935717060686	0.424193264708998	0.999763342266748
ENSMUSG00000002319	0.20205826637019	0.999940051448475	0.219597502277933	0.991075759304225	0.144269479520873	0.974751406661564	0.0504879091490737	0.741770871045163
ENSMUSG00000002320	0.479419424316587	0.999940051448475	0.236790204782872	0.999528357155053	0.397459213047837	0.99935717060686	0.253794588808792	0.999763342266748
ENSMUSG00000002324	0.681538578774403	0.999940051448475	0.54844348046312	0.999528357155053	0.423049092778378	0.99935717060686	0.284293821244469	0.999763342266748
ENSMUSG00000002325	0.868768071405533	0.999940051448475	0.424230430936271	0.999528357155053	0.821888078893586	0.99935717060686	0.00295440181508379	0.215952242837633
ENSMUSG00000002326	0.296581933760834	0.999940051448475	0.306643518913296	0.999528357155053	0.208209466167335	0.99935717060686	0.232763304664071	0.999763342266748
ENSMUSG00000002329	0.627111949464583	0.999940051448475	0.72230046853293	0.999528357155053	0.133881718336059	0.955055052969257	0.702414533941929	0.999763342266748
ENSMUSG00000002332	0.547499754852911	0.999940051448475	0.501303423500514	0.999528357155053	0.215597191290416	0.99935717060686	0.921559886210179	0.999763342266748
ENSMUSG00000002341	0.533704534973005	0.999940051448475	0.618154214236635	0.999528357155053	0.685911815326974	0.99935717060686	0.306450295109616	0.999763342266748
ENSMUSG00000002342	0.243239698315888	0.999940051448475	0.698908589931731	0.999528357155053	0.217604017377878	0.99935717060686	0.514281094798317	0.999763342266748
ENSMUSG00000002343	0.192900694744337	0.999940051448475	0.0806166994355333	0.837885476692882	0.0239417561833547	0.606731688824495	0.418529758571216	0.999763342266748
ENSMUSG00000002345	0.954718907230332	0.999940051448475	0.954317335311125	0.999528357155053	0.585357198953484	0.99935717060686	0.626692969851683	0.999763342266748
ENSMUSG00000002346	0.604050253110107	0.999940051448475	0.623655662355464	0.999528357155053	0.0309467773632983	0.66070906310886	0.183662427177821	0.978835938772012
ENSMUSG00000002365	0.961389527544576	0.999940051448475	0.667148568008199	0.999528357155053	0.993362865550325	0.99935717060686	0.878943558713501	0.999763342266748
ENSMUSG00000002372	0.68211532009628	0.999940051448475	0.0926211365703413	0.872671192317984	0.190498332551975	0.99935717060686	0.266940367155279	0.999763342266748
ENSMUSG00000002379	0.667667186055097	0.999940051448475	0.974973316172878	0.999528357155053	0.701912207506318	0.99935717060686	0.880797727582628	0.999763342266748
ENSMUSG00000002393	0.0244764532824244	0.9093575302499	0.0168870051452119	0.504854608031015	0.0248988438082094	0.611579637695559	0.187947495196229	0.978835938772012
ENSMUSG00000002395	0.742422365670766	0.999940051448475	0.738900130934554	0.999528357155053	0.702471692234198	0.99935717060686	0.764283648336166	0.999763342266748
ENSMUSG00000002396	0.134006856857443	0.999940051448475	0.076053897987358	0.832826064610332	0.0869840580421238	0.862784557952935	0.0734861913658494	0.836677168930723
ENSMUSG00000002409	0.232660221289901	0.999940051448475	0.550246741641913	0.999528357155053	0.696664548872139	0.99935717060686	0.418845069527957	0.999763342266748
ENSMUSG00000002413	0.668667324753646	0.999940051448475	0.708583469335087	0.999528357155053	0.902638376557727	0.99935717060686	0.920238104448245	0.999763342266748
ENSMUSG00000002416	0.941383347498441	0.999940051448475	0.292553461344497	0.999528357155053	0.220843852604261	0.99935717060686	0.0902390851760523	0.87950735223595
ENSMUSG00000002428	0.0138571573137871	0.774264323693156	0.0595303044632253	0.776449913671112	0.075728116321648	0.83848786861689	0.109510201655331	0.915049115859262
ENSMUSG00000002455	0.923097170534387	0.999940051448475	0.774968774304031	0.999528357155053	0.962976996815235	0.99935717060686	0.943214608026544	0.999763342266748
ENSMUSG00000002458	0.0393066577646416	0.999940051448475	0.263470968248522	0.999528357155053	0.00797488895540802	0.37790290415855	0.0356379868045236	0.669271687308805
ENSMUSG00000002475	0.391265062852651	0.999940051448475	0.617815810008145	0.999528357155053	0.951670721928051	0.99935717060686	0.551056504666716	0.999763342266748
ENSMUSG00000002477	0.955952161419739	0.999940051448475	0.634902612937107	0.999528357155053	0.95509853925255	0.99935717060686	0.429035942520678	0.999763342266748
ENSMUSG00000002486	0.450359807326994	0.999940051448475	0.278417959983778	0.999528357155053	0.158735970700999	0.983045080714724	0.280742160064948	0.999763342266748
ENSMUSG00000002489	0.981230551685683	0.999940051448475	0.359234234240808	0.999528357155053	0.0709152377236534	0.820686289119523	0.0656460343945281	0.801924762077594
ENSMUSG00000002496	0.353767527588688	0.999940051448475	0.391160431943526	0.999528357155053	0.585243937831724	0.99935717060686	0.322325385632191	0.999763342266748
ENSMUSG00000002504	0.251020419212782	0.999940051448475	0.662527469619764	0.999528357155053	0.188389575586671	0.99935717060686	0.860556567917077	0.999763342266748
ENSMUSG00000002524	0.460980092386827	0.999940051448475	0.110448803509193	0.899956514708997	0.349876271795545	0.99935717060686	0.446818501878074	0.999763342266748
ENSMUSG00000002546	0.733069282616066	0.999940051448475	0.890693804579046	0.999528357155053	0.969081345790595	0.99935717060686	0.489503826295699	0.999763342266748
ENSMUSG00000002550	0.9281014595167	0.999940051448475	0.479462904825052	0.999528357155053	0.928010569073121	0.99935717060686	0.383732385129519	0.999763342266748
ENSMUSG00000002565	0.999282183476574	0.999940051448475	0.107588844246806	0.899956514708997	0.312899084572464	0.99935717060686	0.0566498689820173	0.773393863493627
ENSMUSG00000002578	0.121815324412352	0.999940051448475	0.687040368690927	0.999528357155053	0.482045245101148	0.99935717060686	0.541873466814136	0.999763342266748
ENSMUSG00000002580	0.786925856090806	0.999940051448475	0.868959117795382	0.999528357155053	0.882198634134037	0.99935717060686	0.171340553537637	0.972046615010585
ENSMUSG00000002602	0.918492412476255	0.999940051448475	0.228665586367817	0.996013525551337	0.259741739326808	0.99935717060686	0.823617741931477	0.999763342266748
ENSMUSG00000002603	0.0787982673802874	0.999940051448475	0.0551328896804885	0.760871004115779	0.757017113854922	0.99935717060686	0.550283553631313	0.999763342266748
ENSMUSG00000002608	0.0673977816179616	0.999940051448475	0.208343952866188	0.987855253447846	0.183608960311787	0.99935717060686	0.718559577643182	0.999763342266748
ENSMUSG00000002617	0.356489985655272	0.999940051448475	0.235070040212968	0.999528357155053	0.0260096508376587	0.622408499145721	0.206743961027517	0.995283682404812
ENSMUSG00000002625	0.503727845883656	0.999940051448475	0.129961831457809	0.925769125441897	0.554711936189309	0.99935717060686	0.673666275663665	0.999763342266748
ENSMUSG00000002635	0.018673320435434	0.847601197032718	0.248816303733125	0.999528357155053	0.0518543149542783	0.774859254537629	0.32882436503929	0.999763342266748
ENSMUSG00000002658	0.239981580661604	0.999940051448475	0.478814271097764	0.999528357155053	0.179736100678386	0.998815062423619	0.559881772249979	0.999763342266748
ENSMUSG00000002660	0.894836028309528	0.999940051448475	0.862345603728886	0.999528357155053	0.833420039169441	0.99935717060686	0.921188834892252	0.999763342266748
ENSMUSG00000002661	0.568096302843496	0.999940051448475	0.721227769363818	0.999528357155053	0.610573852974583	0.99935717060686	0.405413503158372	0.999763342266748
ENSMUSG00000002668	0.484195363734339	0.999940051448475	0.0176801461640423	0.507970417947376	0.43898119432787	0.99935717060686	0.0224377495399972	0.564249504985584
ENSMUSG00000002679	0.805656552401142	0.999940051448475	0.988630523581482	0.999528357155053	0.695967137051011	0.99935717060686	0.895075877844197	0.999763342266748
ENSMUSG00000002688	0.672269357142923	0.999940051448475	0.740146941197816	0.999528357155053	0.570132077130927	0.99935717060686	0.162782477132523	0.968269088898739
ENSMUSG00000002699	0.0151936664958986	0.799349766778708	0.210207050531176	0.987855253447846	0.72967009793196	0.99935717060686	0.0533655185525597	0.754497644276361
ENSMUSG00000002718	0.484127476835499	0.999940051448475	0.76746821578881	0.999528357155053	0.763277753402643	0.99935717060686	0.961133152322021	0.999763342266748
ENSMUSG00000002728	0.948778354399113	0.999940051448475	0.927020498874136	0.999528357155053	0.756664607058039	0.99935717060686	0.932114272361025	0.999763342266748
ENSMUSG00000002731	0.687360197000769	0.999940051448475	0.733900652797827	0.999528357155053	0.99906568141847	0.999671306993076	0.936442386722996	0.999763342266748
ENSMUSG00000002732	0.667994044542272	0.999940051448475	0.369198363571156	0.999528357155053	0.85983838357121	0.99935717060686	0.298165100289916	0.999763342266748
ENSMUSG00000002733	0.524901417575926	0.999940051448475	0.215592381636597	0.989942966523981	0.516364902194142	0.99935717060686	0.284562455283528	0.999763342266748
ENSMUSG00000002741	0.54314475778829	0.999940051448475	0.845779466918306	0.999528357155053	0.22804301872213	0.99935717060686	0.425520498718474	0.999763342266748
ENSMUSG00000002748	0.588490888736084	0.999940051448475	0.372155728702345	0.999528357155053	0.491163159601132	0.99935717060686	0.225150545649003	0.999763342266748
ENSMUSG00000002763	0.966348668082706	0.999940051448475	0.28609742137306	0.999528357155053	0.832359224802739	0.99935717060686	0.755730168107514	0.999763342266748
ENSMUSG00000002767	0.14875139494138	0.999940051448475	0.103306379409522	0.893316852159808	0.0520652675993039	0.774859254537629	0.10271945836197	0.904999490507655
ENSMUSG00000002768	0.8425243016133	0.999940051448475	0.907390862849954	0.999528357155053	0.655606430067946	0.99935717060686	0.670847264525412	0.999763342266748
ENSMUSG00000002769	0.899484634767648	0.999940051448475	0.329169059941486	0.999528357155053	0.514521489861684	0.99935717060686	0.19892183289613	0.991766850553853
ENSMUSG00000002771	0.343296209583229	0.999940051448475	0.520033347306435	0.999528357155053	0.875727315316843	0.99935717060686	0.869189893232066	0.999763342266748
ENSMUSG00000002778	0.399943223863632	0.999940051448475	0.679791748099894	0.999528357155053	0.894940820592346	0.99935717060686	0.31585164347856	0.999763342266748
ENSMUSG00000002781	0.6034767138622	0.999940051448475	0.520476483820953	0.999528357155053	0.540216233987447	0.99935717060686	0.886904846147126	0.999763342266748
ENSMUSG00000002797	0.738048507132854	0.999940051448475	0.838801901675041	0.999528357155053	0.781668567219708	0.99935717060686	0.211711130850047	0.998535270553233
ENSMUSG00000002799	0.481258544569209	0.999940051448475	0.0560486401190319	0.763737254387925	0.00553466341656181	0.310783698514235	0.000102589445104532	0.0243494248050626
ENSMUSG00000002803	0.595353434437648	0.999940051448475	0.772752121873888	0.999528357155053	0.164469744257661	0.988103572557963	0.615452135027555	0.999763342266748
ENSMUSG00000002804	0.860959932552777	0.999940051448475	0.493112220211154	0.999528357155053	0.485716818031111	0.99935717060686	0.356249180752414	0.999763342266748
ENSMUSG00000002808	0.412310429287406	0.999940051448475	0.898216234021737	0.999528357155053	0.188584082182539	0.99935717060686	0.256365497135666	0.999763342266748
ENSMUSG00000002812	0.507715827953753	0.999940051448475	0.264136681946829	0.999528357155053	0.243208744582908	0.99935717060686	0.878918484546816	0.999763342266748
ENSMUSG00000002814	0.885105891640034	0.999940051448475	0.49531710235312	0.999528357155053	0.286789694181664	0.99935717060686	0.663414947877797	0.999763342266748
ENSMUSG00000002820	0.272585872671285	0.999940051448475	0.894892403961041	0.999528357155053	0.791141920774259	0.99935717060686	0.798529556578445	0.999763342266748
ENSMUSG00000002825	0.783582352664711	0.999940051448475	0.469241906409919	0.999528357155053	0.0371518792108433	0.694230162499437	0.409611619723105	0.999763342266748
ENSMUSG00000002833	0.46147249721258	0.999940051448475	0.116971532477914	0.90597679009916	0.161768133401447	0.988103572557963	0.882399055777988	0.999763342266748
ENSMUSG00000002835	0.119252435112233	0.999940051448475	0.505483346467132	0.999528357155053	0.297987875726938	0.99935717060686	0.0507499160538096	0.741770871045163
ENSMUSG00000002844	0.913191277097269	0.999940051448475	0.941220970799916	0.999528357155053	0.298043922230089	0.99935717060686	0.669811999967179	0.999763342266748
ENSMUSG00000002845	0.448793590240385	0.999940051448475	0.468066683123788	0.999528357155053	0.431466194370366	0.99935717060686	0.375365906689936	0.999763342266748
ENSMUSG00000002846	0.654490827073113	0.999940051448475	0.145633278058677	0.941443326632449	0.28179125058355	0.99935717060686	0.345632377651989	0.999763342266748
ENSMUSG00000002847	0.301851435707655	0.999940051448475	0.678653562855733	0.999528357155053	0.365924100285122	0.99935717060686	0.962397152065217	0.999763342266748
ENSMUSG00000002870	0.170188438166367	0.999940051448475	0.00549717204869298	0.335370588796006	0.142184731103627	0.971542681964546	0.232920860196041	0.999763342266748
ENSMUSG00000002871	0.191162067615489	0.999940051448475	0.348859939097911	0.999528357155053	0.234899826541021	0.99935717060686	0.16242945143535	0.967526699358086
ENSMUSG00000002881	0.03870803577959	0.999940051448475	0.789174690932117	0.999528357155053	0.0384158381757531	0.694553239939709	0.172215952712695	0.973193291292149
ENSMUSG00000002885	0.600267691765476	0.999940051448475	0.678018670569816	0.999528357155053	0.176162048495354	0.99519877055526	0.193747182262491	0.98616431081278
ENSMUSG00000002897	0.946108907405609	0.999940051448475	0.170155135195811	0.961401578268435	0.509734475611329	0.99935717060686	0.2055511005946	0.994442418233642
ENSMUSG00000002900	0.351197301549642	0.999940051448475	0.677151019564445	0.999528357155053	0.975115068973003	0.99935717060686	0.482806600115771	0.999763342266748
ENSMUSG00000002908	0.193526067799575	0.999940051448475	0.790036047969224	0.999528357155053	0.627795088966249	0.99935717060686	0.410450811612815	0.999763342266748
ENSMUSG00000002910	0.849009960296811	0.999940051448475	0.100416903094155	0.884206097344263	0.0772179264651155	0.845012950790118	0.195302377608219	0.987031762268288
ENSMUSG00000002944	0.487096567799203	0.999940051448475	0.60602996216909	0.999528357155053	0.961909157752591	0.99935717060686	0.159722462137597	0.96637974409844
ENSMUSG00000002948	0.319594461944846	0.999940051448475	0.653818655603999	0.999528357155053	0.450378645446098	0.99935717060686	0.793727925735921	0.999763342266748
ENSMUSG00000002949	0.725996870755952	0.999940051448475	0.384575055399415	0.999528357155053	0.29518775299524	0.99935717060686	0.304070420451356	0.999763342266748
ENSMUSG00000002957	0.611560259801499	0.999940051448475	0.179590532922569	0.967584699449014	0.952913802524679	0.99935717060686	0.943140830401643	0.999763342266748
ENSMUSG00000002963	0.160707707804485	0.999940051448475	0.0784575864455905	0.836581569519215	0.0329885048002739	0.676011562928218	0.0399817542914031	0.702406012744319
ENSMUSG00000002968	0.278350356700186	0.999940051448475	0.183038277937584	0.970727103857745	0.274022712764118	0.99935717060686	0.481792735053622	0.999763342266748
ENSMUSG00000002980	0.665325812832642	0.999940051448475	0.642613887102755	0.999528357155053	0.626267659201885	0.99935717060686	0.795526729455284	0.999763342266748
ENSMUSG00000002981	0.404472278706296	0.999940051448475	0.528226279490418	0.999528357155053	0.964224591801107	0.99935717060686	0.938463385370845	0.999763342266748
ENSMUSG00000002983	0.163169634599395	0.999940051448475	0.445760205636897	0.999528357155053	0.024332673847179	0.608146290054379	0.125857306639586	0.940577548327203
ENSMUSG00000002984	0.245233403041729	0.999940051448475	0.6413143493769	0.999528357155053	0.377012186702592	0.99935717060686	0.556152081944066	0.999763342266748
ENSMUSG00000002985	0.0342243180743361	0.987461419542383	0.350726283767526	0.999528357155053	0.0197399696547317	0.556322344762991	0.206407855405413	0.995283682404812
ENSMUSG00000002992	0.116502162420234	0.999940051448475	0.295216705280451	0.999528357155053	0.214330782754543	0.99935717060686	0.987822185349461	0.999763342266748
ENSMUSG00000002996	0.955441134774254	0.999940051448475	0.469004431384806	0.999528357155053	0.726420619592068	0.99935717060686	0.852523435295979	0.999763342266748
ENSMUSG00000002997	0.0522952051085299	0.999940051448475	0.0743455346215168	0.827207539657656	0.0539541298784628	0.783437438312957	0.0052713827688365	0.298274638194012
ENSMUSG00000003031	0.578627987336702	0.999940051448475	0.997993174614594	0.999885792718139	0.398853371327943	0.99935717060686	0.972514517871268	0.999763342266748
ENSMUSG00000003032	0.939788706756535	0.999940051448475	0.100398301992537	0.884206097344263	0.263664019717069	0.99935717060686	0.170221943172345	0.972046615010585
ENSMUSG00000003033	0.299563955087836	0.999940051448475	0.334120055552857	0.999528357155053	0.16253291453632	0.988103572557963	0.234201584196632	0.999763342266748
ENSMUSG00000003037	0.794336970771752	0.999940051448475	0.665354943930804	0.999528357155053	0.151680871414748	0.980275252077565	0.331349406869412	0.999763342266748
ENSMUSG00000003038	0.840693633819013	0.999940051448475	0.531102233677191	0.999528357155053	0.621412102108547	0.99935717060686	0.480122661190225	0.999763342266748
ENSMUSG00000003039	0.612860334570735	0.999940051448475	0.618081119189734	0.999528357155053	0.506214891314175	0.99935717060686	0.610926572514929	0.999763342266748
ENSMUSG00000003051	0.949196138347936	0.999940051448475	0.0506325747376415	0.749883358230277	0.0051826824769398	0.29703658649351	0.197573480658763	0.990627797337641
ENSMUSG00000003053	0.513423759210096	0.999940051448475	0.518624189932377	0.999528357155053	0.427856609477793	0.99935717060686	0.412893964855306	0.999763342266748
ENSMUSG00000003062	0.50387542669236	0.999940051448475	0.615330374845308	0.999528357155053	0.662362047408589	0.99935717060686	0.73557864818344	0.999763342266748
ENSMUSG00000003068	0.384050830803893	0.999940051448475	0.256373582196164	0.999528357155053	0.538316046254651	0.99935717060686	0.964616866001678	0.999763342266748
ENSMUSG00000003070	0.159122482510018	0.999940051448475	0.201267547079247	0.983010738571721	0.71613211981933	0.99935717060686	0.811672029307926	0.999763342266748
ENSMUSG00000003072	0.182152114348222	0.999940051448475	0.189544807876522	0.974433419799437	0.445943773736298	0.99935717060686	0.516160318543341	0.999763342266748
ENSMUSG00000003099	0.0783211194485039	0.999940051448475	0.00429790187159222	0.289914588082579	0.0187095850518041	0.545015094113805	0.0036546061126772	0.246455904080592
ENSMUSG00000003119	0.626005763309652	0.999940051448475	0.258604783065547	0.999528357155053	0.211406822403652	0.99935717060686	0.4885747373745	0.999763342266748
ENSMUSG00000003123	0.263180952395955	0.999940051448475	0.197578491449134	0.982191130794892	0.00818449243616851	0.383989103463573	0.63214578737423	0.999763342266748
ENSMUSG00000003131	0.958492325730636	0.999940051448475	0.65602954559685	0.999528357155053	0.84749744577653	0.99935717060686	0.313900026987934	0.999763342266748
ENSMUSG00000003134	0.0757286790650091	0.999940051448475	0.43749229040815	0.999528357155053	0.862279896920692	0.99935717060686	0.970458377891862	0.999763342266748
ENSMUSG00000003135	0.236087055685988	0.999940051448475	0.118227121116998	0.907312616990476	0.12114389893936	0.939927702984918	0.11380187959072	0.920027757896217
ENSMUSG00000003153	0.937341553970294	0.999940051448475	0.884037104189567	0.999528357155053	0.0573922147928248	0.785260071752117	0.72316308227544	0.999763342266748
ENSMUSG00000003154	0.525583362292086	0.999940051448475	0.606541435344904	0.999528357155053	0.969987061952555	0.99935717060686	0.717607430608667	0.999763342266748
ENSMUSG00000003161	0.892946192797345	0.999940051448475	0.679356533711003	0.999528357155053	0.542691485614778	0.99935717060686	0.788684424704782	0.999763342266748
ENSMUSG00000003166	0.918459255395775	0.999940051448475	0.723023406031303	0.999528357155053	0.579633970292373	0.99935717060686	0.843939547428618	0.999763342266748
ENSMUSG00000003184	0.26050194568944	0.999940051448475	0.715035539642078	0.999528357155053	0.810051024772264	0.99935717060686	0.839339288402615	0.999763342266748
ENSMUSG00000003190	0.370487797482948	0.999940051448475	0.92909537264655	0.999528357155053	0.43764696080168	0.99935717060686	0.72531009164647	0.999763342266748
ENSMUSG00000003198	0.778736227825801	0.999940051448475	0.779920939058306	0.999528357155053	0.724356517910363	0.99935717060686	0.339528115608039	0.999763342266748
ENSMUSG00000003199	0.691567496123628	0.999940051448475	0.745321840962483	0.999528357155053	0.670016415050279	0.99935717060686	0.774019176478778	0.999763342266748
ENSMUSG00000003200	0.655053704071117	0.999940051448475	0.672194452656364	0.999528357155053	0.354615517346835	0.99935717060686	0.805700837636839	0.999763342266748
ENSMUSG00000003208	0.367369744067618	0.999940051448475	0.187182336870018	0.973657380840209	0.475563927594069	0.99935717060686	0.273313493566259	0.999763342266748
ENSMUSG00000003226	0.574608069724708	0.999940051448475	0.861294949767436	0.999528357155053	0.383218819500302	0.99935717060686	0.831593654038143	0.999763342266748
ENSMUSG00000003227	0.943194209609672	0.999940051448475	0.0214804531253678	0.557241020697834	0.741712431599667	0.99935717060686	0.803063887070652	0.999763342266748
ENSMUSG00000003228	0.813998617774527	0.999940051448475	0.933761740295215	0.999528357155053	0.437078801063871	0.99935717060686	0.0976398943846544	0.895688907075423
ENSMUSG00000003233	0.822864512756785	0.999940051448475	0.97351585543628	0.999528357155053	0.512144675171108	0.99935717060686	0.565365663652128	0.999763342266748
ENSMUSG00000003234	0.629212548398201	0.999940051448475	0.415378269332991	0.999528357155053	0.607415191073614	0.99935717060686	0.611331329657328	0.999763342266748
ENSMUSG00000003235	0.722195352182898	0.999940051448475	0.497796048798634	0.999528357155053	0.482990380941475	0.99935717060686	0.450977637373191	0.999763342266748
ENSMUSG00000003269	0.970214315668352	0.999940051448475	0.27838827470871	0.999528357155053	0.989599960078081	0.99935717060686	0.548871948400148	0.999763342266748
ENSMUSG00000003271	0.569249517037031	0.999940051448475	0.360786067569569	0.999528357155053	0.464250902040662	0.99935717060686	0.23012988640095	0.999763342266748
ENSMUSG00000003273	0.526494712231484	0.999940051448475	0.539477449537444	0.999528357155053	0.690529879140928	0.99935717060686	0.806158188682507	0.999763342266748
ENSMUSG00000003279	0.535233778582213	0.999940051448475	0.0635025886669815	0.786556709763291	0.562001809916834	0.99935717060686	0.49256047817707	0.999763342266748
ENSMUSG00000003282	0.400942379232064	0.999940051448475	0.742507009061466	0.999528357155053	0.721392853718771	0.99935717060686	0.500542963070815	0.999763342266748
ENSMUSG00000003283	0.765580905916547	0.999940051448475	0.8360864736354	0.999528357155053	0.753010312959829	0.99935717060686	0.29611778740515	0.999763342266748
ENSMUSG00000003299	0.70481335414696	0.999940051448475	0.191087994048407	0.975673772918163	0.2010549188726	0.99935717060686	0.492475317622518	0.999763342266748
ENSMUSG00000003308	0.551981058607865	0.999940051448475	0.0434533479595151	0.724158548491679	0.145333311774941	0.974751406661564	0.177383731632853	0.977564110447433
ENSMUSG00000003309	0.379934747255875	0.999940051448475	0.0610908347211749	0.780075652240129	0.37645195796537	0.99935717060686	0.36849249979449	0.999763342266748
ENSMUSG00000003316	0.672243779396248	0.999940051448475	0.885403788131335	0.999528357155053	0.303472679914461	0.99935717060686	0.599501892548374	0.999763342266748
ENSMUSG00000003341	0.767879883681657	0.999940051448475	0.454575510915497	0.999528357155053	0.642163696985522	0.99935717060686	0.75330368610672	0.999763342266748
ENSMUSG00000003344	0.240418637894297	0.999940051448475	0.702450711753638	0.999528357155053	0.117171075820292	0.931187962889795	0.693570818176513	0.999763342266748
ENSMUSG00000003345	0.93494760567553	0.999940051448475	0.881517627070815	0.999528357155053	0.641242619031181	0.99935717060686	0.239417660656083	0.999763342266748
ENSMUSG00000003346	0.210558571693841	0.999940051448475	0.334063599409498	0.999528357155053	0.27710658124484	0.99935717060686	0.511658522406285	0.999763342266748
ENSMUSG00000003348	0.639882945692371	0.999940051448475	0.0586946833760004	0.776449913671112	0.0021796474474724	0.189558445086279	0.0045553822616158	0.277638566931159
ENSMUSG00000003352	0.132701477835475	0.999940051448475	0.0109697019348354	0.442545416245112	0.256272948512321	0.99935717060686	0.138171132522116	0.948945409905862
ENSMUSG00000003354	0.0381622136001787	0.999940051448475	0.0142867790067301	0.47531371585053	0.0284961207823536	0.648739438239092	0.0431314601466687	0.717081300869126
ENSMUSG00000003355	0.390259694442151	0.999940051448475	0.047759644604258	0.741915190363741	0.295257795766111	0.99935717060686	0.00674647113830615	0.333494074406646
ENSMUSG00000003360	0.0955150149205914	0.999940051448475	0.969358055703319	0.999528357155053	0.781790290873055	0.99935717060686	0.265284364337618	0.999763342266748
ENSMUSG00000003363	0.176631086575118	0.999940051448475	0.00920680875270104	0.419298530173011	0.105122392080691	0.900595636269372	0.0968152566155716	0.893458721231005
ENSMUSG00000003378	0.318783988247446	0.999940051448475	0.758599685030869	0.999528357155053	0.791509531100821	0.99935717060686	0.0331640821923368	0.65147470092277
ENSMUSG00000003379	0.924407967350974	0.999940051448475	0.428438185191502	0.999528357155053	0.489777620393746	0.99935717060686	0.403575580074077	0.999763342266748
ENSMUSG00000003380	0.0389601869268224	0.999940051448475	0.140183374251791	0.936253692902107	0.330639680852443	0.99935717060686	0.53743369747354	0.999763342266748
ENSMUSG00000003382	0.920633411830523	0.999940051448475	0.417784353920901	0.999528357155053	0.755130828712551	0.99935717060686	0.720260027665049	0.999763342266748
ENSMUSG00000003402	0.561901315420031	0.999940051448475	0.218171827765157	0.990149939028512	0.858144938205013	0.99935717060686	0.936275783781287	0.999763342266748
ENSMUSG00000003410	0.214103870200259	0.999940051448475	0.685857987556111	0.999528357155053	0.246421392188438	0.99935717060686	0.875724415953441	0.999763342266748
ENSMUSG00000003411	0.297705571936404	0.999940051448475	0.884103640230213	0.999528357155053	0.907240382448121	0.99935717060686	0.494878157691085	0.999763342266748
ENSMUSG00000003418	0.281654339405903	0.999940051448475	0.0661161355698767	0.793635014234822	0.417914202388672	0.99935717060686	0.736356100643925	0.999763342266748
ENSMUSG00000003420	0.153146794888673	0.999940051448475	0.465712029291161	0.999528357155053	0.547266017473785	0.99935717060686	0.42600094963609	0.999763342266748
ENSMUSG00000003421	0.312854463096853	0.999940051448475	0.184550967685752	0.973185493729763	0.195195278566682	0.99935717060686	0.238182479594926	0.999763342266748
ENSMUSG00000003423	0.358928927541235	0.999940051448475	0.170340907153776	0.961401578268435	0.785711452741088	0.99935717060686	0.587903157617349	0.999763342266748
ENSMUSG00000003429	0.949686192873967	0.999940051448475	0.753649756080171	0.999528357155053	0.666435247267999	0.99935717060686	0.896677863772484	0.999763342266748
ENSMUSG00000003435	0.413714230492918	0.999940051448475	0.0246870550585378	0.58387998001026	0.150760404087695	0.980043650980089	0.0654633245223852	0.801309252212938
ENSMUSG00000003436	0.899494449486137	0.999940051448475	0.795218827324905	0.999528357155053	0.275973745410069	0.99935717060686	0.853679827855252	0.999763342266748
ENSMUSG00000003437	0.724789330258192	0.999940051448475	0.574944839896057	0.999528357155053	0.192783511737771	0.99935717060686	0.435659930508727	0.999763342266748
ENSMUSG00000003438	0.0501074118057127	0.999940051448475	0.0897294772252343	0.86379724228707	0.167137324832272	0.990823584493968	0.10374115967055	0.904999490507655
ENSMUSG00000003444	0.683263157218309	0.999940051448475	0.855816317748254	0.999528357155053	0.989279488017028	0.99935717060686	0.834537732146871	0.999763342266748
ENSMUSG00000003452	0.633484482972096	0.999940051448475	0.226284532393774	0.99473942661476	0.589464480064231	0.99935717060686	0.238072788672692	0.999763342266748
ENSMUSG00000003458	0.906063053240764	0.999940051448475	0.79861236490714	0.999528357155053	0.362219376027626	0.99935717060686	0.245047937319483	0.999763342266748
ENSMUSG00000003464	0.274579029216658	0.999940051448475	0.332144706244081	0.999528357155053	0.129023659165821	0.949133474331718	0.214581192012695	0.998535270553233
ENSMUSG00000003469	0.852839365678496	0.999940051448475	0.945205743690469	0.999528357155053	0.627195879239053	0.99935717060686	0.526649797310883	0.999763342266748
ENSMUSG00000003476	0.652654598494092	0.999940051448475	0.203865520684599	0.984437139244394	0.96110621013258	0.99935717060686	0.455625110017742	0.999763342266748
ENSMUSG00000003484	0.74788534888323	0.999940051448475	0.382953735876414	0.999528357155053	0.963919731267715	0.99935717060686	0.16800870106198	0.970862099915964
ENSMUSG00000003500	0.847387283319645	0.999940051448475	0.595028878405068	0.999528357155053	0.597001036202937	0.99935717060686	0.449598800831942	0.999763342266748
ENSMUSG00000003518	0.215799355258321	0.999940051448475	0.45311352373649	0.999528357155053	0.0610630975943572	0.795685398016662	0.0539112282445024	0.756862041865828
ENSMUSG00000003526	0.676655788004316	0.999940051448475	0.586314482484001	0.999528357155053	0.716785828366943	0.99935717060686	0.510515359027182	0.999763342266748
ENSMUSG00000003527	0.0689771071276539	0.999940051448475	0.0260246835353708	0.596674804998521	0.0171298754449412	0.526546774811884	0.187066233081148	0.978835938772012
ENSMUSG00000003528	0.712724057004825	0.999940051448475	0.516833710767764	0.999528357155053	0.610494659238591	0.99935717060686	0.819611105498958	0.999763342266748
ENSMUSG00000003531	0.290940280689986	0.999940051448475	0.454478810767974	0.999528357155053	0.311341327648923	0.99935717060686	0.971560526281247	0.999763342266748
ENSMUSG00000003534	0.0458331095765072	0.999940051448475	0.00546700307383547	0.335370588796006	0.0024686088967145	0.202350263357509	0.0465695056299709	0.725335334840246
ENSMUSG00000003541	0.673947339139296	0.999940051448475	0.366849292849067	0.999528357155053	0.604299839691569	0.99935717060686	0.931523099746848	0.999763342266748
ENSMUSG00000003545	0.976098584195468	0.999940051448475	0.717574578954975	0.999528357155053	0.49931934891784	0.99935717060686	0.0950947645919146	0.892254270966683
ENSMUSG00000003546	0.678107387971388	0.999940051448475	0.250497498991154	0.999528357155053	0.307441574374434	0.99935717060686	0.490756360119709	0.999763342266748
ENSMUSG00000003549	0.979163965710775	0.999940051448475	0.495634010160762	0.999528357155053	0.563474731143988	0.99935717060686	0.831509427801309	0.999763342266748
ENSMUSG00000003555	0.205018654211481	0.999940051448475	0.164739863386878	0.955535038028885	0.703969567360749	0.99935717060686	0.00851557847252877	0.364566075106764
ENSMUSG00000003559	0.610932883756547	0.999940051448475	0.510936474435003	0.999528357155053	0.871780499119011	0.99935717060686	0.645479795073329	0.999763342266748
ENSMUSG00000003573	0.604518763310026	0.999940051448475	0.254908042135034	0.999528357155053	0.351062759124484	0.99935717060686	0.548595010761176	0.999763342266748
ENSMUSG00000003575	0.029235701855904	0.93856345276725	0.00424865855831633	0.28968072649406	0.0013381792093808	0.141029586233955	0.00248214924292854	0.193486137139332
ENSMUSG00000003581	0.858872366789394	0.999940051448475	0.611339113130402	0.999528357155053	0.99169583183418	0.99935717060686	0.977799342798173	0.999763342266748
ENSMUSG00000003604	0.62064682827782	0.999940051448475	0.896434125545953	0.999528357155053	0.460070449702184	0.99935717060686	0.502999852565924	0.999763342266748
ENSMUSG00000003617	0.696116050093001	0.999940051448475	0.144081548052749	0.939523008717994	0.397533358673564	0.99935717060686	0.315495475331263	0.999763342266748
ENSMUSG00000003623	0.460431570518542	0.999940051448475	0.960463381176161	0.999528357155053	0.841460554630353	0.99935717060686	0.697043032747828	0.999763342266748
ENSMUSG00000003644	0.818433651800439	0.999940051448475	0.957265914176013	0.999528357155053	0.12729231930732	0.945259981488987	0.160255300114102	0.96637974409844
ENSMUSG00000003660	0.360531176036202	0.999940051448475	0.276579336197657	0.999528357155053	0.530494268374357	0.99935717060686	0.495239857597202	0.999763342266748
ENSMUSG00000003662	0.993303875281922	0.999940051448475	0.162454481692537	0.951776497358995	0.167574989658416	0.991038752514565	0.310574511785759	0.999763342266748
ENSMUSG00000003665	0.64925020498455	0.999940051448475	0.873522945550808	0.999528357155053	0.578613899503849	0.99935717060686	0.735577582488351	0.999763342266748
ENSMUSG00000003680	0.811451610372118	0.999940051448475	0.493277741887419	0.999528357155053	0.832956323491953	0.99935717060686	0.48102233826064	0.999763342266748
ENSMUSG00000003721	0.904405224035237	0.999940051448475	0.984163360388327	0.999528357155053	0.405577872121532	0.99935717060686	0.990520265743092	0.999763342266748
ENSMUSG00000003731	0.365405513229907	0.999940051448475	0.590592687004889	0.999528357155053	0.308788119838654	0.99935717060686	0.79471902047922	0.999763342266748
ENSMUSG00000003746	0.461756605109603	0.999940051448475	0.927097679926167	0.999528357155053	0.510095745631996	0.99935717060686	0.822951643320501	0.999763342266748
ENSMUSG00000003752	0.67884025377562	0.999940051448475	0.972994346964301	0.999528357155053	0.691826737588389	0.99935717060686	0.644786120928652	0.999763342266748
ENSMUSG00000003762	0.154131173796547	0.999940051448475	0.553965598550708	0.999528357155053	0.644895814007601	0.99935717060686	0.342902815594382	0.999763342266748
ENSMUSG00000003778	0.539001656625579	0.999940051448475	0.43023728904945	0.999528357155053	0.974467623292398	0.99935717060686	0.498180687706343	0.999763342266748
ENSMUSG00000003779	0.867620894964826	0.999940051448475	0.990588816917622	0.999528357155053	0.62397365901531	0.99935717060686	0.871081700782034	0.999763342266748
ENSMUSG00000003808	0.394588008240639	0.999940051448475	0.951125412693428	0.999528357155053	0.998991355272558	0.999671306993076	0.928813498779016	0.999763342266748
ENSMUSG00000003809	0.432450270148812	0.999940051448475	0.213998930758137	0.988483895602801	0.829494227017879	0.99935717060686	0.622999234353343	0.999763342266748
ENSMUSG00000003810	0.175325139077603	0.999940051448475	0.0766700958483502	0.8339037571084	0.0660260239716068	0.805796210409901	0.0734718650820612	0.836677168930723
ENSMUSG00000003812	0.000185062271824132	0.0748432679402675	0.751517977695944	0.999528357155053	0.114009384882116	0.922510128656577	0.510891941595007	0.999763342266748
ENSMUSG00000003813	0.636127488618981	0.999940051448475	0.862328755438085	0.999528357155053	0.442809194997663	0.99935717060686	0.45837756548121	0.999763342266748
ENSMUSG00000003814	0.657201901650947	0.999940051448475	0.527787369713942	0.999528357155053	0.154759309388571	0.98175271783788	0.312409488899164	0.999763342266748
ENSMUSG00000003824	0.45169849712916	0.999940051448475	0.761466782711097	0.999528357155053	0.274610770827901	0.99935717060686	0.449706541676015	0.999763342266748
ENSMUSG00000003847	0.97461462982699	0.999940051448475	0.648135923798185	0.999528357155053	0.309428700684363	0.99935717060686	0.531737676130693	0.999763342266748
ENSMUSG00000003848	0.733808426987316	0.999940051448475	0.481442109085152	0.999528357155053	0.263560643128154	0.99935717060686	0.0629518230234977	0.796056688874565
ENSMUSG00000003849	0.821466567614637	0.999940051448475	0.540903664633231	0.999528357155053	0.984629911053599	0.99935717060686	0.382506422402978	0.999763342266748
ENSMUSG00000003863	0.758673278593157	0.999940051448475	0.555000994433127	0.999528357155053	0.509090686593043	0.99935717060686	0.184332342323593	0.978835938772012
ENSMUSG00000003865	0.877168807735508	0.999940051448475	0.950969466329966	0.999528357155053	0.918501361496941	0.99935717060686	0.152500582355665	0.959526532101788
ENSMUSG00000003868	0.238326425883781	0.999940051448475	0.260268682826528	0.999528357155053	0.122909932822928	0.941890400620876	0.152642684684212	0.959526532101788
ENSMUSG00000003872	0.51312650073559	0.999940051448475	0.386913521662222	0.999528357155053	0.921932902617754	0.99935717060686	0.713944538305846	0.999763342266748
ENSMUSG00000003873	0.262107967726626	0.999940051448475	0.0154457984731456	0.492846676137939	0.000739250450818934	0.097027755489695	0.000784889709499737	0.103677157151876
ENSMUSG00000003882	0.019261979868183	0.852036863454903	0.015636484291982	0.494928259772192	0.0481784373120667	0.755387439550884	0.0123913798733056	0.437802571942114
ENSMUSG00000003923	0.634858190825478	0.999940051448475	0.90348863167255	0.999528357155053	0.909370992071349	0.99935717060686	0.798955096355621	0.999763342266748
ENSMUSG00000003929	0.942750257041293	0.999940051448475	0.292811775020609	0.999528357155053	0.951870989519785	0.99935717060686	0.376482769680941	0.999763342266748
ENSMUSG00000003934	0.493360387613515	0.999940051448475	0.939680994939753	0.999528357155053	0.853490560588203	0.99935717060686	0.45098028434826	0.999763342266748
ENSMUSG00000003948	0.2806769001809	0.999940051448475	0.827713633231942	0.999528357155053	0.659304298037595	0.99935717060686	0.773129146734484	0.999763342266748
ENSMUSG00000003949	0.932971848835786	0.999940051448475	0.0498682461410855	0.747973776251341	0.156914969920286	0.983007755897834	0.174078518640833	0.974612379351767
ENSMUSG00000003955	0.641657487952991	0.999940051448475	0.506613661244372	0.999528357155053	0.908295197400873	0.99935717060686	0.551057594560799	0.999763342266748
ENSMUSG00000003970	0.584184616200889	0.999940051448475	0.951295312157745	0.999528357155053	0.48551763539762	0.99935717060686	0.907006603095785	0.999763342266748
ENSMUSG00000003992	0.99246610757015	0.999940051448475	0.679306341731096	0.999528357155053	0.92858628021463	0.99935717060686	0.992408093415199	0.999763342266748
ENSMUSG00000004018	0.632177702028156	0.999940051448475	0.329688147903954	0.999528357155053	0.960158741948992	0.99935717060686	0.200584415083325	0.991875438358967
ENSMUSG00000004031	3.647702381843e-05	0.02804202651752	2.66430431327799e-06	0.00151672923878664	1.85837507536472e-06	0.00104626516743034	2.62133119382395e-05	0.00944079500836739
ENSMUSG00000004032	0.958623845311238	0.999940051448475	0.358087389582176	0.999528357155053	0.534706284889675	0.99935717060686	0.308316907440635	0.999763342266748
ENSMUSG00000004035	0.871820464854747	0.999940051448475	0.479694027150495	0.999528357155053	0.506665676871432	0.99935717060686	0.849205684910982	0.999763342266748
ENSMUSG00000004040	0.254543541574874	0.999940051448475	0.0294086889438692	0.629124917761644	0.549321431343133	0.99935717060686	0.599072675849079	0.999763342266748
ENSMUSG00000004043	0.513646155267811	0.999940051448475	0.122829935197328	0.910407483520452	0.0566929345696856	0.785260071752117	0.608165814496646	0.999763342266748
ENSMUSG00000004044	0.264648258536283	0.999940051448475	0.713081277500366	0.999528357155053	0.467053020780042	0.99935717060686	0.727440853942625	0.999763342266748
ENSMUSG00000004054	0.110763429125325	0.999940051448475	0.180649678709934	0.968980445857965	0.210093543339459	0.99935717060686	0.365873641241593	0.999763342266748
ENSMUSG00000004056	0.196175612284839	0.999940051448475	0.0772369656005096	0.8339037571084	0.230483412445499	0.99935717060686	0.660335012236809	0.999763342266748
ENSMUSG00000004069	0.740771784248943	0.999940051448475	0.328221904513633	0.999528357155053	0.12185089677047	0.940771593470746	0.220683544019388	0.999763342266748
ENSMUSG00000004070	0.590017055799397	0.999940051448475	0.7216572600273	0.999528357155053	0.383407111489993	0.99935717060686	0.775256264342886	0.999763342266748
ENSMUSG00000004071	0.988656670310369	0.999940051448475	0.288220625310942	0.999528357155053	0.118959786970569	0.936724370650102	0.57399191445063	0.999763342266748
ENSMUSG00000004085	0.18862375292279	0.999940051448475	0.249395709649638	0.999528357155053	0.0543108978742541	0.785086046703914	0.0777800957479212	0.849907203926123
ENSMUSG00000004096	0.912134468982014	0.999940051448475	0.582189228149096	0.999528357155053	0.485912375108531	0.99935717060686	0.249721121532573	0.999763342266748
ENSMUSG00000004099	0.460183894522437	0.999940051448475	0.110555417097102	0.899956514708997	0.239565606006214	0.99935717060686	0.970853452527419	0.999763342266748
ENSMUSG00000004100	0.362900785141463	0.999940051448475	0.0812734388418131	0.837885476692882	0.270547677750884	0.99935717060686	0.598540996308773	0.999763342266748
ENSMUSG00000004105	0.0409718733535977	0.999940051448475	0.0627471839364868	0.785456420485357	0.151849139349327	0.980579682233474	0.11325831255153	0.919698812242034
ENSMUSG00000004110	0.00126439503852532	0.229174170641329	0.1985025520271	0.982274732395069	0.271287533092421	0.99935717060686	0.272947381866232	0.999763342266748
ENSMUSG00000004113	0.335704899749574	0.999940051448475	0.00446816376641495	0.297306974769182	0.914144704760113	0.99935717060686	0.570392493849451	0.999763342266748
ENSMUSG00000004127	0.55970229980038	0.999940051448475	0.393640796377487	0.999528357155053	0.79116293493008	0.99935717060686	0.698721474724581	0.999763342266748
ENSMUSG00000004151	0.946766837797425	0.999940051448475	0.572489004837517	0.999528357155053	0.449252732703118	0.99935717060686	0.456251387506436	0.999763342266748
ENSMUSG00000004187	0.0281444994573903	0.932323136557294	0.237870625583665	0.999528357155053	0.0153617837194223	0.51111975255571	0.748664501100829	0.999763342266748
ENSMUSG00000004207	0.18185700869562	0.999940051448475	0.108854943740782	0.899956514708997	0.077756401751298	0.84625196134816	0.0678618322643806	0.813830924422863
ENSMUSG00000004221	0.385456693797178	0.999940051448475	0.678712729544526	0.999528357155053	0.458142831004285	0.99935717060686	0.015894240565211	0.489399144194142
ENSMUSG00000004233	0.863644242743215	0.999940051448475	0.179367968144502	0.96750519194663	0.107226284709086	0.90243868413304	0.854458572960035	0.999763342266748
ENSMUSG00000004263	0.739777071651969	0.999940051448475	0.481009706048908	0.999528357155053	0.552592765471216	0.99935717060686	0.523144475990711	0.999763342266748
ENSMUSG00000004264	0.287579014598477	0.999940051448475	0.110188214484921	0.899956514708997	0.184135755989042	0.99935717060686	0.330380327310956	0.999763342266748
ENSMUSG00000004266	1.71461135809339e-06	0.00201187082196495	4.6290916500511e-07	0.000339520390291764	5.43369810958991e-06	0.00244093409948401	6.48784275103524e-06	0.00300652272962164
ENSMUSG00000004267	0.214028047195311	0.999940051448475	0.706990823593042	0.999528357155053	0.583267005867197	0.99935717060686	0.646479563661886	0.999763342266748
ENSMUSG00000004268	0.749997816920754	0.999940051448475	0.721857877328507	0.999528357155053	0.497083949643906	0.99935717060686	0.956364803766251	0.999763342266748
ENSMUSG00000004270	0.110797877640741	0.999940051448475	0.0469708113603102	0.738654613578619	0.437039167771362	0.99935717060686	0.0659341592336768	0.803682966624161
ENSMUSG00000004285	0.935427318683676	0.999940051448475	0.960557642777498	0.999528357155053	0.742368495303111	0.99935717060686	0.539838988484555	0.999763342266748
ENSMUSG00000004317	0.153373305278417	0.999940051448475	0.19190641078053	0.975673772918163	0.06418765231683	0.800445299754687	0.0760024422282475	0.843403905941538
ENSMUSG00000004319	0.664773340135508	0.999940051448475	0.576454583076402	0.999528357155053	0.841604605329123	0.99935717060686	0.420393464646777	0.999763342266748
ENSMUSG00000004328	0.0211836357073501	0.877821513865545	0.173359506668539	0.963894001979882	0.0155936236862484	0.515625943034929	7.71087101270208e-06	0.00337070898739569
ENSMUSG00000004341	0.0206348449906659	0.867987234380953	0.060599909049703	0.778154471218429	0.0721260438263374	0.824389116061677	0.0875726544698129	0.878864510438586
ENSMUSG00000004347	0.897037611064343	0.999940051448475	0.938314253675262	0.999528357155053	0.915987881323035	0.99935717060686	0.273629612407235	0.999763342266748
ENSMUSG00000004356	0.904597114584923	0.999940051448475	0.887132590152764	0.999528357155053	0.661741360699977	0.99935717060686	0.986895759159352	0.999763342266748
ENSMUSG00000004359	0.435164591602712	0.999940051448475	0.527633694610049	0.999528357155053	0.489070186157141	0.99935717060686	0.880117910141237	0.999763342266748
ENSMUSG00000004360	0.213540741837605	0.999940051448475	0.405419204356211	0.999528357155053	0.308792211613213	0.99935717060686	0.375718704095943	0.999763342266748
ENSMUSG00000004364	0.453318843748763	0.999940051448475	0.480537328418018	0.999528357155053	0.24001259887024	0.99935717060686	0.0795835221905959	0.854613907771522
ENSMUSG00000004383	0.0498997712128321	0.999940051448475	0.128187318529324	0.920387038388035	0.16320191957638	0.988103572557963	0.0282641853480591	0.613555743086299
ENSMUSG00000004393	0.991583649029475	0.999940051448475	0.480642558121225	0.999528357155053	0.810906530879689	0.99935717060686	0.576921110046257	0.999763342266748
ENSMUSG00000004394	0.249847934716755	0.999940051448475	0.0328732494927193	0.659257132516437	0.0264620787920977	0.628334865347546	0.037859999696195	0.686016261256814
ENSMUSG00000004415	0.00106524820580972	0.20832143421335	0.465497396676449	0.999528357155053	0.104740491343294	0.900393179802033	0.271709393648568	0.999763342266748
ENSMUSG00000004446	0.76376589876574	0.999940051448475	0.277058285119955	0.999528357155053	0.328698301719904	0.99935717060686	0.79056940483322	0.999763342266748
ENSMUSG00000004451	0.785498519362627	0.999940051448475	0.272056012563972	0.999528357155053	0.813132710338581	0.99935717060686	0.716804032491742	0.999763342266748
ENSMUSG00000004455	0.628937946918002	0.999940051448475	0.260219132749305	0.999528357155053	0.0770319225459875	0.844218633229333	0.0343260013520953	0.659138741789868
ENSMUSG00000004460	0.520460773406712	0.999940051448475	0.901484615429649	0.999528357155053	0.137013711923647	0.961213971121234	0.292254000905319	0.999763342266748
ENSMUSG00000004462	0.78011441304467	0.999940051448475	0.641042605993727	0.999528357155053	0.338383959249552	0.99935717060686	0.921589419550273	0.999763342266748
ENSMUSG00000004473	0.427422844443463	0.999940051448475	0.663376712043846	0.999528357155053	0.838458368250601	0.99935717060686	0.982273434570877	0.999763342266748
ENSMUSG00000004500	0.030626094583502	0.941762969164957	0.924615128628803	0.999528357155053	0.645590358758511	0.99935717060686	0.160112875147939	0.96637974409844
ENSMUSG00000004508	0.667496468450356	0.999940051448475	0.862238468692376	0.999528357155053	0.781334635252092	0.99935717060686	0.255925005838004	0.999763342266748
ENSMUSG00000004530	0.997995162741505	0.999940051448475	0.903660497956881	0.999528357155053	0.923544585041359	0.99935717060686	0.85595295905111	0.999763342266748
ENSMUSG00000004535	0.639180435930491	0.999940051448475	0.896625825653734	0.999528357155053	0.528071198745053	0.99935717060686	0.716997903690073	0.999763342266748
ENSMUSG00000004540	0.532877122204686	0.999940051448475	0.791453940993625	0.999528357155053	0.809785891074578	0.99935717060686	0.986277466629863	0.999763342266748
ENSMUSG00000004552	0.000804307976240752	0.175037688359078	4.37637550946938e-06	0.00242403891056934	0.00346006281075352	0.245114515805499	0.000477796707881263	0.0750140831373583
ENSMUSG00000004558	0.775675734617296	0.999940051448475	0.685440725879014	0.999528357155053	0.287303999827158	0.99935717060686	0.394767695432725	0.999763342266748
ENSMUSG00000004561	0.810218421064018	0.999940051448475	0.176344980293219	0.965444174107826	0.336442497630479	0.99935717060686	0.366013715177761	0.999763342266748
ENSMUSG00000004562	0.416883000571168	0.999940051448475	0.996559358140309	0.999885792718139	0.720540901504812	0.99935717060686	0.719774014041212	0.999763342266748
ENSMUSG00000004565	0.362579140126269	0.999940051448475	0.0838780698110036	0.846490288101584	0.306677841618119	0.99935717060686	0.240955521594081	0.999763342266748
ENSMUSG00000004567	0.948077812288918	0.999940051448475	0.199382168226156	0.982953609725003	0.365258182934666	0.99935717060686	0.424950268345414	0.999763342266748
ENSMUSG00000004568	0.202210080402868	0.999940051448475	0.994632968555302	0.999885792718139	0.585287390731256	0.99935717060686	0.689136830667342	0.999763342266748
ENSMUSG00000004591	0.652390796079596	0.999940051448475	0.421108476984816	0.999528357155053	0.323263693050206	0.99935717060686	0.32560942701632	0.999763342266748
ENSMUSG00000004609	0.711576164318886	0.999940051448475	0.25952548487552	0.999528357155053	0.0161467461092455	0.517683927820399	0.00466291900215194	0.278872570630009
ENSMUSG00000004610	0.611332581852755	0.999940051448475	0.938667682871129	0.999528357155053	0.940375056628872	0.99935717060686	0.907806401975255	0.999763342266748
ENSMUSG00000004626	0.376296364737892	0.999940051448475	0.0276474424691301	0.614540874145718	0.242401677975771	0.99935717060686	0.0819169489597875	0.859245411743377
ENSMUSG00000004631	0.589360023891041	0.999940051448475	0.971605871467535	0.999528357155053	0.977660694467562	0.99935717060686	0.56491245822951	0.999763342266748
ENSMUSG00000004633	0.739539824247618	0.999940051448475	0.280370418538722	0.999528357155053	0.169029843154474	0.991487616967566	0.446619946980842	0.999763342266748
ENSMUSG00000004637	0.87436533120226	0.999940051448475	0.221835883988938	0.991277093953885	0.369990524122366	0.99935717060686	0.246584928600083	0.999763342266748
ENSMUSG00000004642	0.776909502552263	0.999940051448475	0.718891850200144	0.999528357155053	0.771453581385985	0.99935717060686	0.558170620378647	0.999763342266748
ENSMUSG00000004651	0.990444000319802	0.999940051448475	0.148553944003143	0.944595289405956	0.104988704899375	0.900595636269372	0.15624227831927	0.964092264835265
ENSMUSG00000004655	0.234655986867758	0.999940051448475	0.084346032572446	0.846490288101584	0.878180904029568	0.99935717060686	0.0711423282028455	0.826937202478229
ENSMUSG00000004661	0.971649563861253	0.999940051448475	0.658123362541518	0.999528357155053	0.625912330275235	0.99935717060686	0.666274202758395	0.999763342266748
ENSMUSG00000004665	0.549814664570048	0.999940051448475	0.654333027318604	0.999528357155053	0.844693770305798	0.99935717060686	0.712877699689546	0.999763342266748
ENSMUSG00000004667	0.48647788731165	0.999940051448475	0.490519070805922	0.999528357155053	0.288249390748747	0.99935717060686	0.661189301474786	0.999763342266748
ENSMUSG00000004668	0.0728614826583599	0.999940051448475	0.00851717980511682	0.409404876841428	0.0029151524847455	0.220474292768608	0.38371413711255	0.999763342266748
ENSMUSG00000004677	0.160011879056871	0.999940051448475	0.298059149802712	0.999528357155053	0.642129905638875	0.99935717060686	0.705416485650957	0.999763342266748
ENSMUSG00000004698	0.854348969371631	0.999940051448475	0.599741241289027	0.999528357155053	0.390401154877499	0.99935717060686	0.497971340424719	0.999763342266748
ENSMUSG00000004709	0.0964832510794434	0.999940051448475	0.384915892222711	0.999528357155053	0.274873361809254	0.99935717060686	0.425269453886567	0.999763342266748
ENSMUSG00000004730	0.206060477733506	0.999940051448475	0.216913929294838	0.990149939028512	0.0905564600714812	0.868318741070348	0.807795056884315	0.999763342266748
ENSMUSG00000004748	0.384332503252338	0.999940051448475	0.623649925622927	0.999528357155053	0.990969876579971	0.99935717060686	0.865794831455968	0.999763342266748
ENSMUSG00000004768	0.118786182732714	0.999940051448475	0.0350180841681429	0.668181986288795	0.050147831666326	0.768560794406526	0.0155167292267621	0.481796603595313
ENSMUSG00000004771	0.195946451792209	0.999940051448475	0.321708682831453	0.999528357155053	0.377445681467968	0.99935717060686	0.634281896518877	0.999763342266748
ENSMUSG00000004788	0.525434997452479	0.999940051448475	0.200280812488956	0.983010738571721	0.344992291934618	0.99935717060686	0.344844379176726	0.999763342266748
ENSMUSG00000004789	0.570324702793382	0.999940051448475	0.0600021929347697	0.777030830945711	0.131978251723784	0.954498423911645	0.188044560759427	0.978835938772012
ENSMUSG00000004791	0.471990228495912	0.999940051448475	0.263585356653763	0.999528357155053	0.83994571458415	0.99935717060686	0.663946364976838	0.999763342266748
ENSMUSG00000004798	0.757499231338376	0.999940051448475	0.602553283530631	0.999528357155053	0.561955852533556	0.99935717060686	0.2281002665248	0.999763342266748
ENSMUSG00000004814	0.131288629652706	0.999940051448475	0.0627587801219136	0.785456420485357	0.0994191890709955	0.88920323201709	0.0166327500769802	0.499073749303579
ENSMUSG00000004815	0.361890545171806	0.999940051448475	0.772378796613824	0.999528357155053	0.991304358951308	0.99935717060686	0.897598204528057	0.999763342266748
ENSMUSG00000004837	0.4739228059077	0.999940051448475	0.121619751455043	0.909300648911256	0.0556717228612396	0.785260071752117	0.581456297541854	0.999763342266748
ENSMUSG00000004843	0.384520702186462	0.999940051448475	0.461864111598602	0.999528357155053	0.352150548112478	0.99935717060686	0.404258183594509	0.999763342266748
ENSMUSG00000004846	0.361387107877807	0.999940051448475	0.0514865490600175	0.754228260497497	0.908227706030885	0.99935717060686	0.967052440113174	0.999763342266748
ENSMUSG00000004849	0.190954442543038	0.999940051448475	0.0301458975145292	0.636852789334335	0.187936217107384	0.99935717060686	0.238955938418877	0.999763342266748
ENSMUSG00000004864	0.116091750729114	0.999940051448475	0.132918415866765	0.92880610191924	0.301002968652533	0.99935717060686	0.982020157668793	0.999763342266748
ENSMUSG00000004865	0.810282876293735	0.999940051448475	0.833387471995576	0.999528357155053	0.56571749227567	0.99935717060686	0.750838796424265	0.999763342266748
ENSMUSG00000004872	0.143694886771458	0.999940051448475	0.223490626180844	0.991277093953885	0.480214191771385	0.99935717060686	0.563288139605981	0.999763342266748
ENSMUSG00000004880	0.649480667615553	0.999940051448475	0.855239988283278	0.999528357155053	0.520507600852518	0.99935717060686	0.630604412858091	0.999763342266748
ENSMUSG00000004885	0.680843399245905	0.999940051448475	0.993193901592427	0.999528357155053	0.987264848776374	0.99935717060686	0.869889233076961	0.999763342266748
ENSMUSG00000004891	0.301397419255496	0.999940051448475	0.768830097570165	0.999528357155053	0.855388240549676	0.99935717060686	0.626901172078322	0.999763342266748
ENSMUSG00000004892	0.563768798148963	0.999940051448475	0.217829486655618	0.990149939028512	0.891274036690955	0.99935717060686	0.463636995473126	0.999763342266748
ENSMUSG00000004895	0.596910517397151	0.999940051448475	0.73304838991543	0.999528357155053	0.388629141983567	0.99935717060686	0.828034453735427	0.999763342266748
ENSMUSG00000004896	0.637737978403227	0.999940051448475	0.500083293151035	0.999528357155053	0.183891498065554	0.99935717060686	0.605260699988556	0.999763342266748
ENSMUSG00000004897	0.523677022102073	0.999940051448475	0.48969757520754	0.999528357155053	0.45529195806618	0.99935717060686	0.883730289876233	0.999763342266748
ENSMUSG00000004902	0.518954739676398	0.999940051448475	0.228858577721345	0.996013525551337	0.265245553499264	0.99935717060686	0.284001452873315	0.999763342266748
ENSMUSG00000004929	0.4318771975092	0.999940051448475	0.6728834713186	0.999528357155053	0.67740253471909	0.99935717060686	0.750951476717087	0.999763342266748
ENSMUSG00000004931	0.355295217197915	0.999940051448475	0.522027768514962	0.999528357155053	0.463234242396483	0.99935717060686	0.860606755197481	0.999763342266748
ENSMUSG00000004933	0.423302062689857	0.999940051448475	0.249744934383588	0.999528357155053	0.982902249826875	0.99935717060686	0.151083001414	0.959526532101788
ENSMUSG00000004934	0.862555268375986	0.999940051448475	0.703407395846951	0.999528357155053	0.930013691278906	0.99935717060686	0.337049819759169	0.999763342266748
ENSMUSG00000004936	0.169231706369871	0.999940051448475	0.595139879029296	0.999528357155053	0.914589468338894	0.99935717060686	0.961487276733081	0.999763342266748
ENSMUSG00000004937	0.315974399763596	0.999940051448475	0.0712218842717439	0.816017932775165	0.390499146563179	0.99935717060686	0.499984279636966	0.999763342266748
ENSMUSG00000004945	0.995206748003052	0.999940051448475	0.933725699034264	0.999528357155053	0.617141000016303	0.99935717060686	0.262939707164016	0.999763342266748
ENSMUSG00000004947	0.173125142387696	0.999940051448475	0.00760205911609674	0.388520198317423	0.0102078021653917	0.4260432889273	0.0675629218345773	0.811993412064725
ENSMUSG00000004948	0.934234288630401	0.999940051448475	0.991434066475241	0.999528357155053	0.628332709213689	0.99935717060686	0.715552076460571	0.999763342266748
ENSMUSG00000004951	0.881506803567857	0.999940051448475	0.699460009853261	0.999528357155053	0.972154262748707	0.99935717060686	0.693753947403378	0.999763342266748
[truncated: 19,799 more rows]
