# Supplementary material for: Enhanced pro-apoptosis gene signature following the activation of TAp63α in oocytes upon γ irradiation
Source: Cell Death Dis. 2022 Mar 4;13(3):204. doi: 10.1038/s41419-022-04659-2 (PMC8897389; doi:10.1038/s41419-022-04659-2)
Supplement: Supplementary file 8 — Suppl_Table_7_otherStudies [file 41419_2022_4659_MOESM8_ESM.xlsx]

## Sheet: Suppl_Table_otherStudies
Supplementary Table 7 Expression values of RNA-seq samples for the different points of time with high irradiation dosage. (A) Selected genes of interest in this article. (B) p53 related genes based on Kenzelman et al. (C) p63 related genes based on Riege et al. The cluster assignment as well as Gene Name and ENSEMBL ID is given and if the gene was identified as DEG via DESeq2 in our analysis.
Ensembl ID	Gene Name	DE	Cluster	normalized counts
				gen1_0h	gen2_0h	gen1_1h	gen2_1h	gen2_2h30	gen1_4h	gen2_4h	gen2_6h
A	selected genes of interest
ENSMUSG00000022510	Trp63	no	no CL	1357	2339	2338	2072	2667	1817	1841	1884
ENSMUSG00000059552	Trp53	no	no CL	3291	1909	2098	2631	2592	2643	3179	2905
ENSMUSG00000029026	Trp73	no	no CL	26	4	22	14	14	20	104	112
ENSMUSG00000023067	Cdkn1a	yes	CL7 up	116	114	150	275	1204	1007	2195	1443
ENSMUSG00000002083	Bbc3	no	no CL	34	28	14	28	71	42	44	44
ENSMUSG00000024521	Pmaip1	yes	CL7 up	21	55	89	43	404	281	1171	526
ENSMUSG00000020184	Mdm2	yes	CL7 up	1107	1500	1205	2041	6908	5161	12990	16210
ENSMUSG00000054387	Mdm4	no	no CL	5877	10208	6644	8429	7454	4024	6795	5940
B	p53 genes (Kenzelman et al)
ENSMUSG00000056214	Pard6g	no	no CL	519	832	668	642	1971	1365	1889	1377
ENSMUSG00000028211	Trp53inp1	no	no CL	1526	2340	1553	3475	5854	3761	6053	5463
ENSMUSG00000026923	Notch1	no	no CL	882	170	358	707	543	209	697	487
ENSMUSG00000029512	Ulk1	no	no CL	709	699	1051	1271	1447	1298	1490	1512
ENSMUSG00000003873	Bax	no	no CL	937	771	1058	1330	1964	1537	3098	2783
ENSMUSG00000002015	Bcap31	no	no CL	6193	5946	6287	4834	4881	5790	5017	4538
ENSMUSG00000031489	Adrb3	no	no CL	26	5	9	29	7	41	12	10
ENSMUSG00000023067	Cdkn1a	yes	CL7 up	116	114	150	275	1204	1007	2195	1443
ENSMUSG00000021559	Dapk1	no	no CL	274	352	346	313	356	755	667	451
ENSMUSG00000036986	Pml	no	no CL	449	488	458	825	822	388	528	926
ENSMUSG00000062762	Ei24	no	no CL	678	953	722	877	1272	1015	1590	1240
ENSMUSG00000046731	Kctd11	no	no CL	22	170	64	132	129	160	172	107
ENSMUSG00000057897	Camk2b	no	no CL	162	334	253	399	427	270	438	336
ENSMUSG00000020099	Unc5b	no	no CL	41	54	122	62	66	113	47	82
ENSMUSG00000029207	Apbb2	no	no CL	1243	1533	1697	1835	2036	1463	2223	1837
ENSMUSG00000049932	H2afx	no	no CL	287	722	1020	606	668	250	851	448
ENSMUSG00000029166	Mapre3	no	no CL	92	136	73	167	153	111	208	192
ENSMUSG00000019851	Perp	no	no CL	168	418	628	221	654	237	1533	850
ENSMUSG00000029027	Dffb	no	no CL	110	176	162	153	372	268	210	462
ENSMUSG00000029026	Trp73	no	no CL	26	4	22	14	14	20	104	112
ENSMUSG00000032715	Trib3	no	no CL	6	21	4	29	17	15	9	21
ENSMUSG00000032504	Pdcd6ip	no	no CL	1340	5807	1346	2518	3463	1416	3632	3139
ENSMUSG00000045730	Adrb2	no	no CL	23	196	113	50	119	142	210	189
ENSMUSG00000075334	Rprm	no	no CL	9	4	3	18	18	12	45	20
ENSMUSG00000097993	Ptprv	no	no CL	1032	425	734	1009	1257	864	1679	1309
ENSMUSG00000022074	Tnfrsf10b	yes	CL3 up	225	241	483	297	628	612	903	745
ENSMUSG00000025810	Nrp1	no	no CL	849	1630	1278	2023	994	1177	1022	1712
ENSMUSG00000020326	Ccng1	yes	CL5 up	1044	1848	1570	1514	4803	4588	7377	5754
ENSMUSG00000048756	Foxo3	no	no CL	2514	2707	3070	2813	3899	2406	3068	2613
ENSMUSG00000040734	Ppp1r13l	no	no CL	15	38	66	24	46	27	32	78
ENSMUSG00000017386	Traf4	no	no CL	154	163	167	213	528	497	393	453
ENSMUSG00000026817	Ak1	no	no CL	19	90	166	43	58	104	190	143
ENSMUSG00000020184	Mdm2	yes	CL7 up	1107	1500	1205	2041	6908	5161	12990	16210
ENSMUSG00000058290	Espl1	no	no CL	921	604	970	895	1605	941	1875	1323
ENSMUSG00000064326	Siva1	no	no CL	2338	1244	2643	2209	2917	3101	3185	2647
ENSMUSG00000038416	Cdc16	no	no CL	1742	2097	1837	1701	2519	1531	1931	2286
ENSMUSG00000043987	Cep164	no	no CL	547	620	453	484	646	269	889	756
ENSMUSG00000068744	Psrc1	yes	CL3 up	185	151	323	392	353	558	647	466
ENSMUSG00000019647	Sema6a	no	no CL	438	340	603	308	468	481	303	383
ENSMUSG00000031666	Rbl2	no	no CL	810	739	641	1032	1232	1082	1092	916
ENSMUSG00000026181	Ppm1f	no	no CL	398	338	306	450	719	506	330	395
ENSMUSG00000009628	Tex15	no	no CL	4646	11984	15829	9555	13778	6434	6898	6578
ENSMUSG00000027654	Fam83d	no	no CL	667	992	546	466	822	481	552	834
ENSMUSG00000015850	Adamtsl4	no	no CL	39	33	45	82	18	41	55	44
ENSMUSG00000041954	Tnfrsf18	no	no CL	17	25	8	29	11	27	61	110
ENSMUSG00000028893	Sesn2	yes	CL7 up	64	80	107	120	489	245	563	593
ENSMUSG00000029176	Anapc4	no	no CL	3055	4728	2833	3564	3763	3075	4111	3970
ENSMUSG00000029161	Cgref1	no	no CL	13	48	30	23	18	28	48	82
ENSMUSG00000022607	Ptk2	no	no CL	731	1640	1225	1066	1608	1571	1698	1957
ENSMUSG00000020525	Ppm1d	no	no CL	370	205	428	242	467	686	495	400
ENSMUSG00000034457	Eda2r	yes	CL7 up	91	35	177	138	611	896	1271	1400
ENSMUSG00000024521	Pmaip1	yes	CL7 up	21	55	89	43	404	281	1171	526
ENSMUSG00000054387	Mdm4	no	no CL	5877	10208	6644	8429	7454	4024	6795	5940
ENSMUSG00000030852	Tacc2	no	no CL	1374	1222	1404	1333	1462	1578	1701	1476
ENSMUSG00000037725	Ckap2	no	no CL	1017	915	1015	811	1950	1977	1921	2069
ENSMUSG00000027496	Aurka	no	no CL	1242	1992	1089	1385	1616	1484	1959	1609
ENSMUSG00000005370	Msh6	no	no CL	1039	1889	1963	1825	2106	1478	1979	1697
ENSMUSG00000042677	Zc3h12a	no	no CL	16	22	25	15	28	16	38	45
ENSMUSG00000005233	Spc25	no	no CL	1758	2970	3055	1919	2850	2618	3196	2747
ENSMUSG00000002083	Bbc3	no	no CL	34	28	14	28	71	42	44	44
ENSMUSG00000020108	Ddit4	no	no CL	88	64	96	100	160	110	198	108
ENSMUSG00000022105	Rb1	no	no CL	1301	1037	1279	1064	1393	1656	1092	988
ENSMUSG00000079553	Kifc1	no	no CL	217	153	242	210	358	309	308	186
ENSMUSG00000024778	Fas	no	no CL	90	76	53	105	103	227	237	290
C	p63 genes (eLife – Riege et al)
ENSMUSG00000019960	Dusp6	no	no CL	666	410	406	521	389	716	397	452
ENSMUSG00000030559	Rab38	no	no CL	387	214	123	188	205	138	249	264
ENSMUSG00000029821	Gsdme	no	no CL	3080	5321	4311	3899	3473	4160	4637	4035
ENSMUSG00000041782	Lad1	no	no CL	3	5	29	28	19	19	9	37
ENSMUSG00000094018	S100a2	no	no CL	1	2	0	1	1	0	2	9
ENSMUSG00000059900	Tmem40	no	no CL	1	16	25	5	3	11	16	16
ENSMUSG00000048373	Fgfbp1	no	no CL	5	10	289	5	2	13	6	12
ENSMUSG00000031910	Has3	no	no CL	65	93	39	63	36	95	32	127
ENSMUSG00000032012	Nectin1	no	no CL	215	223	586	409	347	308	272	364
ENSMUSG00000024613	Tcof1	no	no CL	623	645	624	707	552	573	846	749
ENSMUSG00000053716	Dusp7	no	no CL	589	547	423	982	665	695	738	1050
ENSMUSG00000027398	Il1b	no	no CL	10	7	16	2	0	5	25	41
ENSMUSG00000039395	Mreg	no	no CL	175	297	215	137	164	289	130	142
ENSMUSG00000025364	Pa2g4	no	no CL	6560	6429	6043	5685	6504	6547	8115	7626
ENSMUSG00000002459	Rgs20	no	no CL	6	23	24	14	8	13	9	11
ENSMUSG00000020592	Sdc1	no	no CL	2425	4774	4095	5315	4888	3700	5445	4787
ENSMUSG00000047281	Sfn	yes	CL5 up	9	28	66	38	133	104	162	197
ENSMUSG00000054459	Vsnl1	no	no CL	20	7	16	27	8	8	13	10
ENSMUSG00000030047	Arhgap25	no	no CL	77	83	48	106	28	71	99	161
ENSMUSG00000047832	Cdca4	no	no CL	1348	1520	1474	1283	1395	1271	1631	1555
ENSMUSG00000030002	Dusp11	no	no CL	2770	2480	2562	2155	2115	2850	1949	1717
ENSMUSG00000055333	Fat2	no	no CL	40	77	60	26	90	60	19	94
ENSMUSG00000027356	Fermt1	yes	CL7 up	9	7	70	8	641	336	849	1159
ENSMUSG00000026102	Inpp1	no	no CL	208	309	333	466	191	472	349	702
ENSMUSG00000026638	Irf6	no	no CL	411	703	792	1037	1057	1130	2014	1765
ENSMUSG00000027111	Itga6	no	no CL	15517	12952	14503	10564	12267	11189	11638	12574
ENSMUSG00000074749	Kiz	no	no CL	1428	2255	1261	1318	1302	596	1346	1312
ENSMUSG00000033902	Mapkbp1	no	no CL	364	330	409	331	358	354	471	347
ENSMUSG00000022272	Myo10	no	no CL	9444	4802	9862	6142	4924	7028	6483	6227
ENSMUSG00000020527	Myo19	no	no CL	246	119	323	212	361	363	360	343
ENSMUSG00000028587	Orc1	no	no CL	965	1877	749	1448	983	622	631	1130
ENSMUSG00000030774	Pak1	no	no CL	413	277	395	564	614	284	432	293
ENSMUSG00000048776	Pthlh	no	no CL	6	5	25	4	3	12	2	19
ENSMUSG00000020439	Smtn	no	no CL	447	233	450	280	322	275	484	292
ENSMUSG00000014547	Wdfy2	no	no CL	778	1021	866	652	752	1125	726	667
ENSMUSG00000024066	Xdh	no	no CL	6	16	4	59	1917	60	393	1474
ENSMUSG00000030220	Arhgdib	no	no CL	557	484	543	386	478	489	658	520
ENSMUSG00000020897	Aurkb	no	no CL	919	935	1092	753	1699	1241	1553	1374
ENSMUSG00000020042	Btbd11	no	no CL	191	185	151	163	86	269	138	97
ENSMUSG00000033170	Card10	no	no CL	21	86	66	118	135	123	90	51
ENSMUSG00000002835	Chaf1a	no	no CL	360	531	250	303	361	390	259	215
ENSMUSG00000006724	Cyp27b1	no	no CL	7	5	3	3	13	11	2	8
ENSMUSG00000032118	Fez1	no	no CL	320	615	530	801	903	358	531	397
ENSMUSG00000034792	Gna15	no	no CL	13	4	5	23	29	27	83	62
ENSMUSG00000042808	Gpx2	no	no CL	8	15	9	8	33	6	7	13
ENSMUSG00000060803	Gstp1	no	no CL	5218	3768	4544	2948	4200	4192	4927	3989
ENSMUSG00000025499	Hras	no	no CL	209	133	140	123	156	192	243	215
ENSMUSG00000020393	Kremen1	no	no CL	585	825	587	619	687	712	484	403
ENSMUSG00000032193	Ldlr	no	no CL	373	650	706	979	668	563	473	516
ENSMUSG00000042688	Mapk6	no	no CL	3609	3966	3338	4588	5293	3031	4563	4502
ENSMUSG00000034593	Myo5a	no	no CL	1160	2453	1271	1781	1911	1194	699	1416
ENSMUSG00000008690	Ncaph2	no	no CL	2333	1834	2267	2088	2431	2447	3042	2351
ENSMUSG00000022678	Nde1	no	no CL	1064	1379	1156	1461	1174	1613	1677	1501
ENSMUSG00000054008	Ndst1	no	no CL	1060	845	787	427	376	1069	763	844
ENSMUSG00000020411	Nipal4	no	no CL	10	15	9	4	6	10	21	6
ENSMUSG00000021868	Ppif	no	no CL	265	528	251	630	594	221	557	374
ENSMUSG00000021209	Ppp4r4	no	no CL	73	185	214	200	44	57	72	350
ENSMUSG00000020415	Pttg1	no	no CL	6583	2273	5668	3560	3653	4860	4342	4709
ENSMUSG00000041992	Rapgef5	no	no CL	288	253	384	542	195	704	485	537
ENSMUSG00000035049	Rrp12	no	no CL	147	346	246	236	334	179	306	267
ENSMUSG00000048775	Serpinb13	no	no CL	8	7	4	6	11	13	7	6
ENSMUSG00000025889	Snca	no	no CL	137	312	76	121	95	131	202	136
ENSMUSG00000026470	Stx6	no	no CL	524	1459	637	1028	1667	563	1299	1529
ENSMUSG00000028527	Ak4	no	no CL	490	789	793	1332	933	678	1894	1169
ENSMUSG00000049807	Arhgap23	no	no CL	303	212	382	117	222	265	155	251
ENSMUSG00000038774	Ascc3	no	no CL	568	2017	797	1188	1225	885	1123	1143
ENSMUSG00000017146	Brca1	no	no CL	745	1367	1106	1000	767	369	1117	1108
ENSMUSG00000038187	Btbd10	no	no CL	976	1115	951	1151	1241	941	1157	1013
ENSMUSG00000021258	Ccnk	no	no CL	1203	560	844	598	599	699	425	433
ENSMUSG00000007739	Cct4	no	no CL	8173	9601	10599	8663	9683	7167	10102	8142
ENSMUSG00000005087	Cd44	no	no CL	215	696	616	438	579	529	488	396
ENSMUSG00000046722	Cdc42se1	no	no CL	508	595	783	447	449	588	541	409
ENSMUSG00000055612	Cdca7	no	no CL	1494	1150	1244	1602	1618	1577	1781	1433
ENSMUSG00000025064	Col17a1	no	no CL	140	38	62	18	37	20	49	25
ENSMUSG00000006134	Crkl	no	no CL	326	532	367	407	698	589	514	510
ENSMUSG00000024914	Drap1	no	no CL	1024	470	988	825	1064	820	934	712
ENSMUSG00000027293	Ehd4	no	no CL	198	1371	429	1006	638	261	858	1103
ENSMUSG00000051220	Ercc6l	no	no CL	594	1269	763	753	689	461	1001	566
ENSMUSG00000040728	Esrp1	no	no CL	2467	2075	2493	2247	2537	2101	2108	2108
ENSMUSG00000027533	Fabp5	no	no CL	859	741	999	416	419	466	445	260
ENSMUSG00000039187	Fanci	no	no CL	447	662	587	348	748	422	648	583
ENSMUSG00000061981	Flot2	no	no CL	802	1210	1445	1465	1949	1154	2003	2134
ENSMUSG00000024912	Fosl1	no	no CL	1	7	23	7	36	9	14	23
ENSMUSG00000030064	Frmd4b	no	no CL	1215	2126	1647	2000	1547	731	993	1624
ENSMUSG00000029581	Fscn1	no	no CL	512	1283	843	1423	1160	475	1854	1831
ENSMUSG00000031669	Gins3	no	no CL	213	263	262	317	172	140	226	324
ENSMUSG00000000594	Gm2a	no	no CL	2386	2354	3392	3030	4009	2900	2863	3398
ENSMUSG00000056758	Hmga2	no	no CL	1693	752	1223	841	863	1125	692	790
ENSMUSG00000025757	Hspa4l	no	no CL	565	1591	1159	1382	839	764	1018	986
ENSMUSG00000027276	Jag1	no	no CL	2577	3134	2731	2195	1962	1686	2163	1271
ENSMUSG00000098557	Kctd12	no	no CL	893	523	900	886	795	1317	450	958
ENSMUSG00000041498	Kif14	no	no CL	1240	2031	1459	1292	1821	906	1695	1436
ENSMUSG00000056394	Lig1	no	no CL	1869	1907	2465	2556	2346	1891	1819	2214
ENSMUSG00000036832	Lpar3	no	no CL	13	3	4	8	7	8	6	19
ENSMUSG00000032497	Lrrfip2	no	no CL	684	799	486	490	824	689	945	1166
ENSMUSG00000032688	Malt1	no	no CL	575	1473	391	433	768	670	419	690
ENSMUSG00000034751	Mast4	no	no CL	4271	2116	2334	2996	3906	2133	1745	3613
ENSMUSG00000041859	Mcm3	no	no CL	1311	1620	1130	1529	1131	973	1106	1087
ENSMUSG00000000957	Mmp14	no	no CL	1191	1414	2177	1939	1925	1710	1865	1893
ENSMUSG00000041445	Mmrn2	no	no CL	137	205	142	198	74	182	94	187
ENSMUSG00000001569	Nom1	no	no CL	705	803	408	1405	1081	524	1064	959
ENSMUSG00000020598	Nrcam	no	no CL	206	415	272	272	238	223	307	184
ENSMUSG00000062991	Nrg1	no	no CL	754	1021	468	752	345	478	419	888
ENSMUSG00000032661	Oas3	no	no CL	51	41	24	28	12	47	38	70
ENSMUSG00000016487	Ppfibp1	no	no CL	1082	2648	1130	1499	1912	1337	2358	2675
ENSMUSG00000027611	Procr	no	no CL	69	98	81	179	194	163	237	352
ENSMUSG00000036327	Qsox2	no	no CL	505	676	375	477	491	443	656	499
ENSMUSG00000007646	Rad51c	no	no CL	369	255	361	511	564	471	490	452
ENSMUSG00000029370	Rassf6	no	no CL	128	158	288	157	143	166	106	177
ENSMUSG00000037674	Rfx7	no	no CL	1764	1118	901	1303	1187	1399	1264	1374
ENSMUSG00000053617	Sh3pxd2a	no	no CL	587	555	590	560	385	488	365	409
ENSMUSG00000001918	Slc1a5	no	no CL	63	124	121	107	65	112	138	100
ENSMUSG00000005107	Slc2a9	no	no CL	11	2	13	8	62	28	31	77
ENSMUSG00000032122	Slc37a2	no	no CL	82	167	223	252	152	203	154	178
ENSMUSG00000021540	Smad5	no	no CL	2478	2209	2380	2437	2773	2843	2688	2317
ENSMUSG00000051934	Spats2	no	no CL	2083	3069	2429	2013	1613	1683	1608	2018
ENSMUSG00000027067	Ssrp1	no	no CL	3614	5506	3951	5255	5939	4716	5848	5809
ENSMUSG00000002603	Tgfb1	no	no CL	7	21	62	40	68	18	3	20
ENSMUSG00000038079	Tmem237	no	no CL	1110	1496	1271	1410	1868	1176	1484	1219
ENSMUSG00000018322	Tomm34	no	no CL	1205	788	1336	1120	939	1069	1040	904
ENSMUSG00000040350	Trim7	no	no CL	472	189	209	373	346	334	757	821
ENSMUSG00000021569	Trip13	no	no CL	462	878	604	712	644	563	685	621
ENSMUSG00000028152	Tspan5	no	no CL	871	571	754	710	805	756	555	555
ENSMUSG00000038335	Tsr1	no	no CL	1009	1882	916	1008	1073	880	1621	1020
ENSMUSG00000025747	Tyms	no	no CL	3414	2495	4701	2568	2763	2595	2904	2837
ENSMUSG00000026558	Uck2	no	no CL	726	869	583	509	678	505	780	572
ENSMUSG00000041438	Utp4	no	no CL	2689	3818	2858	3905	4441	3290	4414	4013
ENSMUSG00000053110	Yap1	no	no CL	1137	1140	1401	1020	937	1781	1266	704
ENSMUSG00000014932	Yes1	no	no CL	1373	2186	1273	1344	1844	1360	1298	1090
ENSMUSG00000045817	Zfp36l2	no	no CL	2496	1720	2446	1302	1648	2613	1367	1357
ENSMUSG00000032375	Aph1b	no	no CL	567	947	725	1096	737	815	1014	752
ENSMUSG00000032000	Birc3	no	no CL	887	724	737	822	524	568	1056	1087
ENSMUSG00000057337	Chst3	no	no CL	104	69	62	51	84	99	30	66
ENSMUSG00000039007	Cpq	no	no CL	2764	3594	2771	2813	3445	2514	3191	3154
ENSMUSG00000037887	Dusp8	no	no CL	76	3	39	108	50	65	54	47
ENSMUSG00000045394	Epcam	no	no CL	503	893	456	694	690	354	674	247
ENSMUSG00000062312	Erbb2	no	no CL	666	1678	1002	1053	1169	1337	1614	1123
ENSMUSG00000027204	Fbn1	no	no CL	4507	4115	5007	4117	4538	3884	3608	3586
ENSMUSG00000031703	Itfg1	no	no CL	1423	4326	1837	2644	3066	1493	3064	2439
ENSMUSG00000020782	Llgl2	no	no CL	72	49	46	113	73	105	60	74
ENSMUSG00000003458	Ncstn	no	no CL	5466	4851	4554	6056	5500	5749	7048	7222
ENSMUSG00000026525	Opn3	no	no CL	121	230	40	74	99	44	72	93
ENSMUSG00000052534	Pbx1	no	no CL	7237	3400	5266	3521	2620	3995	3327	3184
ENSMUSG00000032788	Pdxk	no	no CL	111	427	247	293	202	307	284	301
ENSMUSG00000029322	Plac8	no	no CL	743	412	334	543	166	323	321	438
ENSMUSG00000001020	S100a4	no	no CL	8	3	17	10	14	10	4	24
ENSMUSG00000056222	Spock1	no	no CL	57	114	73	45	20	69	37	58
ENSMUSG00000020422	Tns3	no	no CL	1811	1313	1649	1281	1547	1386	1451	1450
ENSMUSG00000035199	Arl6ip5	no	no CL	894	675	976	755	613	1301	690	926
ENSMUSG00000020173	Cobl	no	no CL	318	379	390	360	171	303	325	382
ENSMUSG00000018378	Cuedc1	no	no CL	146	103	223	192	234	177	176	318
ENSMUSG00000026879	Gsn	no	no CL	1004	1145	1338	2190	1605	2893	1345	1500
ENSMUSG00000028019	Pdgfc	no	no CL	815	713	756	608	651	433	1141	395
ENSMUSG00000056204	Pgpep1	no	no CL	776	340	729	1099	2041	1286	2312	1799
ENSMUSG00000036606	Plxnb2	no	no CL	2224	1366	2299	2402	2560	1761	1872	1707
ENSMUSG00000020674	Pxdn	no	no CL	2508	2464	2467	2607	2531	1920	2135	2545
ENSMUSG00000038831	Ralgps1	no	no CL	569	381	543	612	694	524	689	723
ENSMUSG00000035305	Ror1	no	no CL	116	237	345	288	281	193	121	99
ENSMUSG00000045775	Slc16a5	no	no CL	33	31	47	18	19	35	7	28
ENSMUSG00000027800	Tm4sf1	no	no CL	899	969	1072	838	455	1189	870	823
ENSMUSG00000024885	Aldh3b1	no	no CL	648	831	608	950	873	426	735	568
ENSMUSG00000024087	Cyp1b1	no	no CL	1468	2618	1584	2098	2666	1436	2842	2292
ENSMUSG00000037375	Hhat	no	no CL	951	744	1131	1167	1125	838	768	872
ENSMUSG00000045039	Megf8	no	no CL	415	250	400	491	585	322	615	409
ENSMUSG00000050737	Ptges	no	no CL	6593	7192	8105	8225	8551	7420	9747	7400
ENSMUSG00000009291	Pttg1ip	no	no CL	6543	4169	7610	6497	7853	7353	7497	7410
ENSMUSG00000036781	Rps27l	no	no CL	4066	2915	4108	3037	3184	4328	3897	3625
ENSMUSG00000018900	Slc22a5	no	no CL	408	593	339	764	787	430	533	630
ENSMUSG00000050395	Tnfsf15	no	no CL	23	14	29	24	33	26	13	7
ENSMUSG00000029233	Srd5a3	no	no CL	305	414	367	429	419	228	453	498
