# Supplementary material for: Enhanced pro-apoptosis gene signature following the activation of TAp63α in oocytes upon γ irradiation
Source: Cell Death Dis. 2022 Mar 4;13(3):204. doi: 10.1038/s41419-022-04659-2 (PMC8897389; doi:10.1038/s41419-022-04659-2)
Supplement: Supplementary file 9 — Suppl_Table_8_ipsc [file 41419_2022_4659_MOESM9_ESM.xlsx]

## Sheet: Tabelle1
Supplementary Table 8 (A) Genes identified in the study by Soares et al as being down-regulated upon inactivation of ΔNp63α by the R304W or R204W mutation in patient derived iPSCs and that are differentially regulated in our study. (B) Genes from the iPSCs study that are up-regulated and that are differentially expressed in γ-irradiated oocytes.
A	1 hour	2.5 hours	4 hours	6 hours
Lypd3	1.75	1.9	-0.12	0.33
Ankrd65	0.17	1.44	2.74	2.79
Jag2	0.27	0.8	1.04	1.63
B	1 hour	2.5 hours	4 hours	6 hours
Fam167A	0.54	1.01	1.5	1.55
Eda2r	0.97	2.47	3.24	3.35
Pmaip1	0.42	2.01	2.78	2.24
Asap1	1.4	1.06	0.54	0.42
Ifit1	-1.41	-0.38	-0.46	1.93
Ifit3	-0.86	-1.33	-1.87	1.95
Usp18	0.32	0.39	-0.01	2.17
Isg15	0.89	0.32	0.14	2.03
