# Supplementary material for: Enhanced pro-apoptosis gene signature following the activation of TAp63α in oocytes upon γ irradiation
Source: Cell Death Dis. 2022 Mar 4;13(3):204. doi: 10.1038/s41419-022-04659-2 (PMC8897389; doi:10.1038/s41419-022-04659-2)
Supplement: Supplementary file 12 — Suppl_Table_11_RNAseq_samples_lowhigh [file 41419_2022_4659_MOESM12_ESM.xlsx]

## Sheet: totalData_Goterm_ValuesForLinep
Supplementary Table 11 RNA-seq samples and their normalized and scaled counts are shown for the high dosage and low dosage for 0h, 1h, 2.5h, 4h and 6h as well as the log2 foldchanges. The column DE provides information if in high dosage the genes were differentially expressed and to which cluster they belong. (A) Apoptosis related, (B) DNA Damage and Repair related, (C) p53 related.
Ensembl ID	Name	DE	Cluster	normalized counts										absolute log2 foldchanges
				high dosage					low dosage					high dosage				low dosage
				0h	1h	2h	4h	6h	0h	1h	2h	4h	6h	1h	2h	4h	6h	1h	2h	4h	6h
A	Apoptosis
ENSMUSG00000029433	Diablo	no	no CL	2841	2446	3466	3301	3433	3174	3121	3091	3457	3401	0.215974	0.286873	0.216504	0.273071	0.0242938	0.0382285	0.123218	0.0996569
ENSMUSG00000002083	Bbc3	no	no CL	31	21	71	43	44	14	40	22	32	61	0.561879	1.19555	0.472068	0.505235	1.51457	0.652077	1.19265	2.12338
ENSMUSG00000029027	Dffb	no	no CL	143	157	372	239	462	215	285	303	252	231	0.134749	1.37929	0.740995	1.69188	0.406625	0.494981	0.229087	0.103556
ENSMUSG00000087260	Lamtor5	no	no CL	2473	2391	2260	2633	1622	2209	2249	2500	2638	2778	0.0486481	0.129939	0.0904453	0.608488	0.0258902	0.178535	0.256051	0.330653
ENSMUSG00000024521	Pmaip1	yes	CL7 up	38	66	404	726	526	54	212	186	666	300	0.796467	3.41028	4.2559	3.79099	1.97303	1.78427	3.62449	2.47393
ENSMUSG00000044303	Cdkn2a	no	no CL	44	55	53	38	24	43	30	40	50	34	0.321928	0.268489	0.211504	0.874469	0.519374	0.104337	0.217591	0.338802
ENSMUSG00000028974	Dffa	no	no CL	204	288	282	340	390	398	528	461	283	286	0.4975	0.467126	0.736966	0.934905	0.407769	0.211998	0.491966	0.476753
ENSMUSG00000040093	Bmf	no	no CL	55	143	170	92	65	126	66	80	287	55	1.37851	1.62803	0.742202	0.241008	0.932886	0.655352	1.18763	1.19592
ENSMUSG00000022219	Cideb	no	no CL	7	2	5	5	5	8	3	1	5	29	1.80735	0.485427	0.485427	0.485427	1.41504	3	0.678072	1.85798
ENSMUSG00000024073	Birc6	no	no CL	7104	6587	6503	5078	5459	7711	6974	8816	10268	11927	0.10901	0.127526	0.484371	0.379995	0.144932	0.193206	0.413165	0.629241
ENSMUSG00000004446	Bid	no	no CL	416	455	618	557	449	617	640	472	641	761	0.129283	0.571023	0.421094	0.110132	0.0528014	0.386484	0.0550539	0.302626
ENSMUSG00000032463	Faim	no	no CL	1036	941	1143	1088	1022	928	831	1172	1381	1097	0.138757	0.141801	0.0706546	0.0196288	0.159276	0.336776	0.573517	0.241367
ENSMUSG00000024526	Cidea	no	no CL	10	10	1	13	3	27	17	7	2	6	0	3.32193	0.378512	1.73697	0.667425	1.94753	3.75489	2.16993
ENSMUSG00000016758	Bik	no	no CL	41	36	28	43	70	12	19	55	41	31	0.187627	0.550197	0.0687128	0.771731	0.662965	2.1964	1.77259	1.36923
ENSMUSG00000022051	Bnip3l	no	no CL	12507	14933	15970	15358	12708	13029	15154	16146	17200	13545	0.255768	0.352629	0.296255	0.0230012	0.217972	0.30945	0.400682	0.056034
ENSMUSG00000024959	Bad	no	no CL	525	708	739	695	605	852	778	741	796	680	0.431432	0.493257	0.404696	0.204618	0.131083	0.20138	0.098085	0.325319
ENSMUSG00000022255	Mtdh	no	no CL	4018	3935	3552	3392	3376	5290	3802	3840	4858	7704	0.0301139	0.177846	0.244341	0.251163	0.476509	0.462161	0.122905	0.54234
ENSMUSG00000078566	Bnip3	no	no CL	2512	2825	3572	3307	2296	3326	2842	3287	3482	2979	0.169414	0.507896	0.396687	0.129714	0.226882	0.0170167	0.066128	0.15896
ENSMUSG00000096316	Faiml	no	no CL	1	3	1	1	17	3	4	3	1	3	1.58496	0	0	4.08746	0.415037	0	1.58496	0
ENSMUSG00000030278	Cidec	no	no CL	1	5	3	14	4	6	15	7	8	1	2.32193	1.58496	3.80735	2	1.32193	0.222392	0.415037	2.58496
ENSMUSG00000025507	Pidd1	no	no CL	157	101	202	513	513	244	260	224	230	211	0.636409	0.363591	1.70819	1.70819	0.0916305	0.123382	0.0852473	0.209638
													mean	0.559891	0.830651	0.772994	0.991813	0.56133	0.643617	0.825858	0.837633
													stdev	0.656691	0.968239	1.14485	1.15599	0.559045	0.836822	1.07598	0.881272
B	DNA Damage and Repair
ENSMUSG00000040204	Pclaf	no	no CL	2016	1788	1069	980	1093	1276	1308	1738	1410	1395	0.173149	0.915234	1.04064	0.883202	0.0357342	0.4458	0.144067	0.128637
ENSMUSG00000032397	Tipin	no	no CL	2221	2497	2188	2534	2733	2607	2337	3034	2614	3269	0.168986	0.0215967	0.190207	0.299276	0.157733	0.218831	0.00386856	0.326459
ENSMUSG00000024824	Rad9a	no	no CL	461	485	676	758	547	554	640	537	736	757	0.073218	0.552256	0.717431	0.246774	0.208186	0.0449639	0.40982	0.450407
ENSMUSG00000038569	Rad9b	no	no CL	630	637	758	498	770	727	640	901	1114	661	0.0159415	0.266846	0.339206	0.289507	0.183883	0.309572	0.615722	0.137305
ENSMUSG00000048668	Rhno1	no	no CL	906	920	937	1088	926	874	913	1411	1258	1103	0.0221228	0.048538	0.264096	0.0315011	0.0629816	0.691013	0.525427	0.335728
ENSMUSG00000076430	Hus1b	no	no CL	2	2	16	4	3	12	5	5	2	1	0	3	1	0.584963	1.26303	1.26303	2.58496	3.58496
ENSMUSG00000038544	Inip	no	no CL	829	1176	1165	886	1033	1060	983	1294	1255	1651	0.504444	0.490886	0.0959346	0.317396	0.108801	0.287773	0.243623	0.639276
ENSMUSG00000020413	Hus1	no	no CL	417	650	489	645	693	419	782	703	672	652	0.640392	0.229787	0.629252	0.732808	0.900218	0.746574	0.681511	0.637922
ENSMUSG00000041238	Rbbp8	no	no CL	1083	940	955	912	1048	878	839	1301	1141	987	0.204301	0.181461	0.247928	0.0473945	0.0655501	0.567328	0.378006	0.168829
ENSMUSG00000021639	Gtf2h2	no	no CL	1795	2059	2203	2406	1806	2962	2824	3186	2931	2122	0.19796	0.295486	0.422653	0.00881405	0.0688316	0.105175	0.0151787	0.481147
ENSMUSG00000012483	Rpa3	no	no CL	1546	1299	852	1217	1092	1279	1496	1776	1711	1596	0.251139	0.859615	0.345211	0.501567	0.226094	0.473615	0.419823	0.319444
ENSMUSG00000054612	Mgmt	no	no CL	549	617	515	641	647	839	688	626	810	404	0.168464	0.0922337	0.223518	0.23696	0.286262	0.422508	0.0507489	1.05432
ENSMUSG00000010362	Rdm1	no	no CL	569	718	739	784	838	577	875	901	762	544	0.335555	0.377146	0.462425	0.558522	0.600712	0.642956	0.40122	0.0849647
ENSMUSG00000034023	Fancd2	no	no CL	856	961	1072	746	1063	1012	1243	1020	673	944	0.166926	0.324622	0.198435	0.312459	0.296617	0.0113599	0.588531	0.100351
ENSMUSG00000021668	Polk	no	no CL	573	482	1251	1471	1762	680	572	1017	974	1124	0.249502	1.12647	1.36019	1.62061	0.24952	0.580713	0.518387	0.725035
ENSMUSG00000031583	Wrn	no	no CL	766	618	449	456	626	774	951	800	812	889	0.309738	0.770629	0.748311	0.291182	0.297112	0.0476664	0.0691462	0.19985
ENSMUSG00000023953	Polh	no	no CL	154	115	97	156	97	265	90	189	294	260	0.421296	0.666874	0.0186157	0.666874	1.558	0.487606	0.149824	0.0274807
ENSMUSG00000030166	Rad52	no	no CL	551	536	863	770	612	710	902	919	965	908	0.0398193	0.647308	0.482806	0.151479	0.345308	0.372246	0.44271	0.354873
ENSMUSG00000041064	Pif1	no	no CL	139	64	108	137	120	160	75	58	207	194	1.11894	0.364054	0.020909	0.21205	1.09311	1.46395	0.371559	0.277985
ENSMUSG00000030750	Nsmce1	no	no CL	1726	1662	2307	1775	1706	1550	2130	2278	2222	2066	0.0545121	0.418586	0.0403866	0.0168148	0.458585	0.5555	0.519591	0.414572
ENSMUSG00000049717	Lig4	no	no CL	423	208	312	393	659	498	273	281	390	587	1.02407	0.439112	0.106128	0.639621	0.867245	0.825576	0.352672	0.237215
ENSMUSG00000020697	Lig3	no	no CL	1683	1571	1404	1496	1414	1740	1470	1622	2104	1874	0.099352	0.261492	0.169925	0.251253	0.243271	0.101313	0.274047	0.107034
ENSMUSG00000024742	Fen1	no	no CL	1224	1344	1495	1154	1328	1642	1281	1520	1815	1861	0.13493	0.288542	0.0849603	0.117652	0.358184	0.111383	0.144515	0.180624
ENSMUSG00000039738	Slx4	no	no CL	265	229	358	341	261	361	344	412	395	283	0.210645	0.433967	0.363779	0.0219426	0.0695903	0.190646	0.129854	0.351197
ENSMUSG00000025384	Faap100	no	no CL	557	722	960	661	614	1005	556	893	815	732	0.374322	0.785357	0.246973	0.140561	0.854039	0.170463	0.302324	0.45728
ENSMUSG00000030528	Blm	no	no CL	847	868	392	829	742	796	1179	1121	746	1041	0.0353331	1.11151	0.0309899	0.190943	0.566723	0.493946	0.0935928	0.38713
ENSMUSG00000021177	Tdp1	no	no CL	676	894	1021	898	888	1330	1075	1252	958	1181	0.403252	0.594888	0.409692	0.393536	0.30709	0.0871917	0.473329	0.171417
ENSMUSG00000030243	Recql	no	no CL	658	563	880	497	444	1054	982	838	1288	581	0.224953	0.419416	0.404842	0.567528	0.10208	0.330853	0.289258	0.859265
ENSMUSG00000026082	Rev1	no	no CL	528	758	924	779	994	805	632	894	1100	875	0.52166	0.807355	0.561085	0.912708	0.349064	0.151286	0.450443	0.120294
ENSMUSG00000039850	Endov	no	no CL	337	210	285	331	491	218	404	326	351	490	0.682359	0.241787	0.0259174	0.542974	0.890027	0.580544	0.687143	1.16845
ENSMUSG00000022248	Rad1	no	no CL	523	728	498	924	1129	717	970	1168	769	1021	0.477128	0.0706652	0.821082	1.11016	0.436012	0.703995	0.10101	0.509938
ENSMUSG00000026048	Ercc5	no	no CL	646	659	598	1478	1642	645	826	781	857	884	0.0287443	0.111389	1.19404	1.34585	0.356843	0.276023	0.409996	0.454747
ENSMUSG00000039748	Exo1	no	no CL	1003	984	792	919	1043	1081	1076	1280	1713	1529	0.0275914	0.340749	0.126185	0.0564176	0.00668845	0.243777	0.664159	0.500222
ENSMUSG00000051235	Gen1	no	no CL	382	297	640	379	658	279	542	988	504	301	0.36311	0.744499	0.0113748	0.784515	0.958028	1.82425	0.853159	0.109498
ENSMUSG00000056394	Lig1	no	no CL	1888	2511	2346	1855	2214	2287	2702	2478	2678	2635	0.411403	0.313344	0.0254396	0.229796	0.240571	0.11572	0.2277	0.204347
ENSMUSG00000021461	Fancc	no	no CL	949	702	1207	834	449	1371	1368	1471	1327	1100	0.434937	0.346946	0.186361	1.07969	0.00316034	0.101569	0.0470602	0.317725
ENSMUSG00000025144	Cenpx	no	no CL	1522	1752	1778	1507	1288	1570	1817	1623	1848	1612	0.203034	0.224287	0.0142889	0.240836	0.210794	0.0478984	0.2352	0.0380872
ENSMUSG00000038425	Poli	no	no CL	334	389	402	415	412	341	415	464	454	414	0.219922	0.267347	0.313263	0.302796	0.28334	0.444353	0.412921	0.279859
													mean	0.289294	0.511902	0.36696	0.445761	0.409711	0.435236	0.402161	0.444839
													stdev	0.258721	0.502846	0.350803	0.387872	0.377432	0.397596	0.421724	0.586323
C	p53 related
ENSMUSG00000056214	Pard6g	no	no CL	675	655	1971	1627	1377	774	820	871	1626	1314	0.0433926	1.54597	1.26925	1.02857	0.0832903	0.170339	1.07092	0.76356
ENSMUSG00000028211	Trp53inp1	no	no CL	1933	2514	5854	4907	5463	1621	1827	3117	4019	2834	0.379143	1.59858	1.344	1.49885	0.172593	0.943274	1.30995	0.805956
ENSMUSG00000026923	Notch1	no	no CL	526	532	543	453	487	250	957	839	689	125	0.0163634	0.0458894	0.215552	0.111141	1.93659	1.74674	1.46258	1
ENSMUSG00000029512	Ulk1	no	no CL	704	1161	1447	1394	1512	837	1114	1690	942	1102	0.721721	1.03942	0.985583	1.10281	0.41245	1.01372	0.170499	0.396825
ENSMUSG00000003873	Bax	no	no CL	854	1194	1964	2317	2783	1255	1213	1528	1487	1721	0.483495	1.20149	1.43995	1.70433	0.0491078	0.283957	0.244717	0.45556
ENSMUSG00000002015	Bcap31	no	no CL	6070	5561	4881	5404	4538	5210	5569	6631	6179	5414	0.126352	0.31452	0.167669	0.41964	0.0961349	0.347943	0.24609	0.0554115
ENSMUSG00000031489	Adrb3	no	no CL	15	19	7	27	10	24	21	33	26	16	0.341037	1.09954	0.847997	0.584963	0.192645	0.459432	0.115477	0.584963
ENSMUSG00000023067	Cdkn1a	yes	CL7 up	115	212	1204	1601	1443	178	380	564	1021	687	0.88243	3.38813	3.79927	3.64937	1.09412	1.66382	2.52003	1.94843
ENSMUSG00000021559	Dapk1	no	no CL	313	330	356	711	451	390	459	478	509	719	0.0763034	0.185715	1.18369	0.526965	0.23502	0.293536	0.384192	0.882518
ENSMUSG00000036986	Pml	no	no CL	469	641	822	458	926	750	592	814	809	664	0.450736	0.80955	0.0342403	0.981424	0.341293	0.118138	0.109249	0.175707
ENSMUSG00000062762	Ei24	no	no CL	815	800	1272	1303	1240	725	792	793	997	991	0.0268001	0.642227	0.676965	0.605468	0.127519	0.12934	0.459613	0.450904
ENSMUSG00000046731	Kctd11	no	no CL	96	98	129	166	107	139	68	176	96	79	0.0297473	0.426265	0.790077	0.156504	1.03148	0.340491	0.533979	0.81516
ENSMUSG00000057897	Camk2b	no	no CL	248	326	427	354	336	557	633	543	387	333	0.394532	0.783896	0.513409	0.438121	0.184528	0.0367251	0.525344	0.742155
ENSMUSG00000020099	Unc5b	no	no CL	47	92	66	80	82	84	80	166	139	72	0.968973	0.489805	0.767339	0.802963	0.0703893	0.982722	0.726624	0.222392
ENSMUSG00000029207	Apbb2	no	no CL	1388	1766	2036	1843	1837	1604	2168	2918	1875	1743	0.347478	0.55273	0.409049	0.404344	0.434691	0.863306	0.225216	0.119898
ENSMUSG00000049932	H2afx	no	no CL	505	813	668	550	448	407	423	431	399	670	0.686972	0.403565	0.123148	0.172785	0.0556289	0.0826591	0.02864	0.719132
ENSMUSG00000029166	Mapre3	no	no CL	114	120	153	160	192	195	139	259	109	155	0.0740006	0.424498	0.489038	0.752072	0.488389	0.409478	0.839146	0.331206
ENSMUSG00000019851	Perp	no	no CL	293	425	654	885	850	673	370	235	716	1507	0.536562	1.15839	1.59478	1.53656	0.863081	1.51795	0.0893531	1.163
ENSMUSG00000029027	Dffb	no	no CL	143	157	372	239	462	215	285	303	252	231	0.134749	1.37929	0.740995	1.69188	0.406625	0.494981	0.229087	0.103556
ENSMUSG00000029026	Trp73	no	no CL	15	18	14	62	112	47	27	10	71	97	0.263034	0.0995357	2.04731	2.90046	0.799701	2.23266	0.595158	1.04532
ENSMUSG00000032715	Trib3	no	no CL	14	16	17	12	21	37	24	43	47	6	0.192645	0.280108	0.222392	0.584963	0.624491	0.216811	0.345135	2.62449
ENSMUSG00000032504	Pdcd6ip	no	no CL	3574	1932	3463	2524	3139	2372	2693	2516	2946	3285	0.887445	0.0455172	0.501828	0.187235	0.18311	0.0850279	0.312653	0.469789
ENSMUSG00000045730	Adrb2	no	no CL	110	82	119	176	189	65	110	253	160	22	0.423808	0.113458	0.678072	0.780883	0.758992	1.96063	1.29956	1.56294
ENSMUSG00000075334	Rprm	no	no CL	6	11	18	28	20	13	12	15	4	27	0.874469	1.58496	2.22239	1.73697	0.115477	0.206451	1.70044	1.05445
ENSMUSG00000097993	Ptprv	no	no CL	728	871	1257	1271	1309	1576	1417	1049	1311	1557	0.258734	0.787974	0.803954	0.846455	0.153428	0.587253	0.2656	0.0174986
ENSMUSG00000022074	Tnfrsf10b	yes	CL3 up	233	390	628	758	745	449	358	522	451	610	0.743144	1.43043	1.70187	1.67691	0.326756	0.217334	0.00641199	0.442094
ENSMUSG00000025810	Nrp1	no	no CL	1240	1651	994	1099	1712	1571	1092	1860	1391	2227	0.413	0.319022	0.174149	0.465343	0.52471	0.243619	0.175561	0.503418
ENSMUSG00000020326	Ccng1	yes	CL5 up	1446	1542	4803	5983	5754	1229	1203	1503	3058	3683	0.0927352	1.73187	2.0488	1.9925	0.0308483	0.29036	1.3151	1.5834
ENSMUSG00000048756	Foxo3	no	no CL	2611	2942	3899	2737	2613	4401	3226	3776	3427	5523	0.172195	0.578502	0.067993	0.00110467	0.448085	0.220973	0.360885	0.327621
ENSMUSG00000040734	Ppp1r13l	no	no CL	26	45	46	30	78	66	90	38	25	11	0.791413	0.823122	0.206451	1.58496	0.447459	0.796467	1.40054	2.58496
ENSMUSG00000017386	Traf4	no	no CL	158	190	528	445	453	204	228	257	377	309	0.266075	1.74061	1.49388	1.51959	0.160465	0.333199	0.885995	0.599038
ENSMUSG00000026817	Ak1	no	no CL	55	104	58	147	143	118	98	111	218	91	0.91908	0.0766213	1.41831	1.37851	0.267933	0.0882272	0.885541	0.374848
ENSMUSG00000020184	Mdm2	yes	CL7 up	1303	1623	6908	9076	16210	1384	1803	3200	7166	6468	0.316826	2.40643	2.80022	3.63698	0.381555	1.20923	2.37232	2.22448
ENSMUSG00000058290	Espl1	no	no CL	763	932	1605	1408	1323	1415	1281	1515	2546	759	0.288647	1.07282	0.883892	0.794058	0.143532	0.0985157	0.84743	0.89863
ENSMUSG00000064326	Siva1	no	no CL	1791	2426	2917	3143	2647	2313	2486	2556	3279	2722	0.437814	0.70372	0.811377	0.563593	0.104061	0.144123	0.503491	0.234902
ENSMUSG00000038416	Cdc16	no	no CL	1920	1769	2519	1731	2286	1769	1631	3003	2311	2743	0.118172	0.391745	0.149501	0.251719	0.117177	0.76347	0.385583	0.632821
ENSMUSG00000043987	Cep164	no	no CL	583	468	646	579	756	336	459	930	524	848	0.316987	0.148038	0.00993254	0.37489	0.450033	1.46877	0.641106	1.3356
ENSMUSG00000068744	Psrc1	yes	CL3 up	168	357	353	602	466	290	157	171	444	651	1.08746	1.07121	1.8413	1.47187	0.885288	0.762057	0.614507	1.1666
ENSMUSG00000019647	Sema6a	no	no CL	389	456	468	392	383	385	326	943	453	235	0.229264	0.266738	0.0110835	0.0224258	0.239986	1.2924	0.234653	0.712198
ENSMUSG00000031666	Rbl2	no	no CL	775	837	1232	1087	916	1001	926	730	966	883	0.111031	0.668734	0.488084	0.241151	0.112358	0.455474	0.0513469	0.180957
ENSMUSG00000026181	Ppm1f	no	no CL	368	378	719	418	395	300	433	575	548	561	0.0386805	0.966286	0.183797	0.102147	0.529405	0.938599	0.869213	0.903038
ENSMUSG00000009628	Tex15	no	no CL	8315	12692	13778	6666	6578	12305	14743	13309	20242	12787	0.610131	0.728578	0.318895	0.338067	0.260785	0.113158	0.718107	0.0554332
ENSMUSG00000027654	Fam83d	no	no CL	829	506	822	517	834	430	302	406	626	853	0.712235	0.0122337	0.681208	0.00867528	0.509788	0.0828569	0.541826	0.988209
ENSMUSG00000015850	Adamtsl4	no	no CL	36	63	18	48	44	70	68	63	31	82	0.807355	1	0.415037	0.289507	0.0418202	0.152003	1.17509	0.228269
ENSMUSG00000041954	Tnfrsf18	no	no CL	21	18	11	44	110	34	42	39	39	9	0.222392	0.932886	1.06711	2.38904	0.304855	0.197939	0.197939	1.91754
ENSMUSG00000028893	Sesn2	yes	CL7 up	72	114	489	404	593	50	63	240	419	287	0.662965	2.76377	2.48829	3.04196	0.333424	2.26303	3.06695	2.52105
ENSMUSG00000029176	Anapc4	no	no CL	3892	3199	3763	3593	3970	3871	3463	3711	5198	4017	0.282891	0.0486284	0.115323	0.0286273	0.160684	0.0608983	0.42525	0.0534122
ENSMUSG00000029161	Cgref1	no	no CL	30	27	18	38	82	38	50	32	18	48	0.152003	0.736966	0.341037	1.45066	0.395929	0.247928	1.078	0.337035
ENSMUSG00000022607	Ptk2	no	no CL	1186	1145	1608	1635	1957	1824	1217	2146	1411	1511	0.0507564	0.439163	0.463187	0.72254	0.583777	0.234544	0.370388	0.271602
ENSMUSG00000020525	Ppm1d	no	no CL	287	335	467	591	400	241	267	412	346	355	0.22311	0.702372	1.04211	0.478949	0.147807	0.773611	0.521739	0.558786
ENSMUSG00000034457	Eda2r	yes	CL7 up	63	158	611	1084	1400	154	90	343	641	814	1.3265	3.27775	4.10487	4.47393	0.774933	1.15528	2.05739	2.4021
ENSMUSG00000024521	Pmaip1	yes	CL7 up	38	66	404	726	526	54	212	186	666	300	0.796467	3.41028	4.2559	3.79099	1.97303	1.78427	3.62449	2.47393
ENSMUSG00000054387	Mdm4	no	no CL	8042	7536	7454	5410	5940	5067	7694	9983	7976	8392	0.0937554	0.10954	0.571926	0.437091	0.602602	0.978342	0.654534	0.727883
ENSMUSG00000030852	Tacc2	no	no CL	1298	1368	1462	1639	1476	1392	1184	1648	1823	1696	0.0757778	0.171653	0.336525	0.185402	0.23349	0.243557	0.389155	0.284977
ENSMUSG00000037725	Ckap2	no	no CL	966	913	1950	1949	2069	690	753	1301	1825	1445	0.0814083	1.01338	1.01264	1.09884	0.126054	0.914953	1.40323	1.0664
ENSMUSG00000027496	Aurka	no	no CL	1617	1237	1616	1721	1609	1894	1482	1388	1885	1797	0.386474	0.000892481	0.0899274	0.00715535	0.353891	0.448429	0.00687181	0.0758459
ENSMUSG00000005370	Msh6	no	no CL	1464	1894	2106	1728	1697	1437	1575	1752	2144	1488	0.371521	0.52459	0.239188	0.213071	0.132292	0.285943	0.577245	0.0503145
ENSMUSG00000042677	Zc3h12a	no	no CL	19	20	28	27	45	14	31	22	26	57	0.0740006	0.559427	0.50696	1.24393	1.14684	0.652077	0.893085	2.02554
ENSMUSG00000005233	Spc25	no	no CL	2364	2487	2850	2907	2747	2356	2265	2396	3528	2858	0.0731765	0.269732	0.298301	0.216627	0.0568285	0.0242884	0.582511	0.278666
ENSMUSG00000002083	Bbc3	no	no CL	31	21	71	43	44	14	40	22	32	61	0.561879	1.19555	0.472068	0.505235	1.51457	0.652077	1.19265	2.12338
ENSMUSG00000020108	Ddit4	no	no CL	76	98	160	154	108	95	75	79	100	134	0.366782	1.074	1.01886	0.50696	0.341037	0.266075	0.0740006	0.496234
ENSMUSG00000022105	Rb1	no	no CL	1169	1172	1393	1374	988	1449	1271	1321	1866	1568	0.00369764	0.25292	0.233107	0.242692	0.189094	0.133427	0.364891	0.113868
ENSMUSG00000079553	Kifc1	no	no CL	185	226	358	309	186	226	317	316	231	394	0.288798	0.952434	0.740082	0.00777735	0.48816	0.483602	0.0315701	0.801873
ENSMUSG00000024778	Fas	no	no CL	83	79	103	232	290	131	80	160	54	199	0.0712587	0.311461	1.48294	1.80487	0.711495	0.288505	1.27854	0.603202
													mean	0.379044	0.86383	0.944595	1.01197	0.429119	0.608547	0.759131	0.838609
													stdev	0.313719	0.798827	0.949149	1.03093	0.413893	0.574809	0.733292	0.733489
