# Supplementary material for: Enhanced pro-apoptosis gene signature following the activation of TAp63α in oocytes upon γ irradiation
Source: Cell Death Dis. 2022 Mar 4;13(3):204. doi: 10.1038/s41419-022-04659-2 (PMC8897389; doi:10.1038/s41419-022-04659-2)
Supplement: Supplementary file 13 — Suppl_Table_12_Foldchanges_High_Low [file 41419_2022_4659_MOESM13_ESM.xlsx]

## Sheet: Table
Supplementary Table 12 RNA-seq samples and their log2 foldchanges are shown for the high dosage and low dosage for 1h, 2.5h, 4h and 6h compared to 0h.
Ensembl ID	Gene Name	high dosage log2 Foldchanges				low dosage log2 Foldchanges
		1h	2h30	4h	6h	1h	2h30	4h	6h
ENSMUSG00000057246	BC051142	1.5516	2.1308	3.109	3.0882	2.1791	1.5821	3.6716	1.4925
ENSMUSG00000006574	Slc4a1	-2.5597	-2.4122	-0.7531	-0.6703	0.9462	0.129	0.6559	1
ENSMUSG00000001288	Rarg	1.659	1.0845	1.8101	1.8432	1.7	0.8667	0.8667	1.3667
ENSMUSG00000042215	Bag2	0.4183	0.7067	1.2119	0.8972	0.8424	0.7766	1.0068	1.1769
ENSMUSG00000042050	Wdr60	-1.4179	-0.9665	-0.3067	-1.088	0.7517	0.9091	0.6841	0.7669
ENSMUSG00000002799	Jag2	0.265	0.8033	1.0431	1.6332	1.1763	2.9544	2.0426	1.0091
ENSMUSG00000046352	Gjb2	-0.4654	-0.8009	-0.3518	-2.1168	1	0.4375	1.099	0.6719
ENSMUSG00000025188	Hps1	1.4247	1.8153	1.1667	1.7077	1.6992	4.4286	1.8722	0.8421
ENSMUSG00000040838	Gm11639	1.977	0.6601	1.6983	0.622	0.7152	0.2715	2.7947	0.2715
ENSMUSG00000104252	Pcdha4	0	0	0	0	0.4375	0.875	2.9375	0.9375
ENSMUSG00000031298	Adgrg2	1.1205	1.0606	1.751	0.8358	1.8077	2.5577	0.4615	0.5769
ENSMUSG00000004266	Ptpn6	2.2063	2.4519	2.0959	2.1921	0.6944	0.5556	0.4352	0.9537
ENSMUSG00000050312	Nsun3	0.8959	0.6893	1.2713	1.6552	1.2458	1.1196	0.4601	1.5997
ENSMUSG00000057454	Lypd3	1.753	1.8995	-0.1224	0.3334	0.8049	0.2846	1.6423	1.3333
ENSMUSG00000039450	Dcxr	0.3493	0.8101	1.333	1.2275	1.0763	1.4158	1.8763	1.8368
ENSMUSG00000035566	Pcdh17	-1.0855	-1.6321	-0.6788	-0.5518	0.8382	0.8548	0.7552	0.5934
ENSMUSG00000028132	Tmem56	-0.2994	-0.0007	-1.0769	-1.7171	1.3243	1.2378	1.3838	0.4486
ENSMUSG00000022074	Tnfrsf10b	0.6204	1.1682	1.4358	1.3545	0.7973	1.1626	1.0045	1.3586
ENSMUSG00000074199	Krtdap	2.2618	0.4176	-0.1001	0.251	2	6.1667	1.6667	1.8333
ENSMUSG00000028332	Hemgn	-1.7008	-1.9785	-2.4766	-2.0713	1.1667	1.0833	2.8333	0.1667
ENSMUSG00000027556	Car1	-1.1536	-1.7715	-1.897	-1.4608	0.2857	0.6429	0.3571	0
ENSMUSG00000060032	H2afj	2.0848	2.2794	2.3919	2.2261	0.9738	0.9026	0.9963	1.0524
ENSMUSG00000042589	Cux2	0.6767	0.5942	1.525	0.6672	1.6667	1.483	4.0204	1.5578
ENSMUSG00000020184	Mdm2	0.2449	1.8479	2.2476	2.7519	1.3027	2.3121	5.1777	4.6734
ENSMUSG00000030474	Siglece	1.987	1.1224	2.3552	0.7131	1.2409	1.1089	1.1815	1.1419
ENSMUSG00000047854	Stx19	1.3451	0.6068	1.7843	1.8089	1.0492	1.4918	0.7705	1.1148
ENSMUSG00000068154	Insm1	-1.4471	-1.4491	-1.2614	-1.8706	1.6667	0.6667	3.1667	11.6667
ENSMUSG00000099353	1700031M16Rik	1.0931	0.717	1.6727	0.0301	1.1875	1.125	2.5625	0.6875
ENSMUSG00000031574	Star	-0.5128	-1.6696	-0.2035	-0.5092	0.4925	0.714	0.2409	0.529
ENSMUSG00000052821	Cysltr1	1.7562	-0.0912	0.9605	1.0191	5.1613	5.2903	7.5161	3.0968
ENSMUSG00000034724	Cnot6l	0.8641	1.4456	0.284	0.7352	0.8745	1.0591	0.5773	1.0446
ENSMUSG00000104713	Gbp6	-2.4073	-0.7182	0.8314	1.1862	2.8298	1.8936	0.7021	3.4894
ENSMUSG00000029875	Ccdc184	-1.9949	-3.2515	-2.8288	-4.1309	1.125	42.6875	41.25	113.188
ENSMUSG00000023067	Cdkn1a	0.6535	2.553	3.0191	2.7452	2.1348	3.1685	5.736	3.8596
ENSMUSG00000056076	Eif3b	0.5074	1.0788	1.6617	2.0437	0.9453	1.1832	3.2268	2.419
ENSMUSG00000043066	Vmn1r66	-1.9849	-1.7771	-1.8707	-1.7786	1.6364	1.0909	1	0.8636
ENSMUSG00000007783	Cpt1c	0.6585	1.0029	0.7633	1.7352	0.9016	1.4721	1.059	0.918
ENSMUSG00000026425	Srgap2	0.5808	0.4169	0.8517	1.3201	0.7371	1.722	0.5611	1.2471
ENSMUSG00000047281	Sfn	0.8686	1.7092	1.8219	2.0598	0.8421	3.4737	8.5263	6.0526
ENSMUSG00000063021	Hist1h2ak	1.7844	0.0505	2.0059	2.2995	2.75	2.65	0.1	1.55
ENSMUSG00000004328	Hif3a	0.9305	0.6046	0.9744	1.9947	1.2345	2.6276	1.8828	1.269
ENSMUSG00000111410	AL670603.1	-1.9644	-1.4464	-0.1101	-0.6821	0	0.2687	0	1.1045
ENSMUSG00000060441	Trim5	0.7196	1.4721	2.0001	1.4342	3.8409	0.7727	5.0455	0.1818
ENSMUSG00000022385	Gtse1	-0.0471	1.0186	1.3735	1.2374	1.0923	1.4231	3.1962	1.8231
ENSMUSG00000026822	Lcn2	-2.0169	-1.9782	-1.8096	-1.9939	0.5938	0.4062	0.1875	0.375
ENSMUSG00000040896	Kcnd3	2.2185	-0.1581	-0.3028	1.9161	0.5223	1.8351	0.2131	0.2577
ENSMUSG00000031480	Thsd1	1.0864	0.8513	1.4041	1.066	1.3167	1.4667	2.5625	1.5708
ENSMUSG00000005251	Ripk4	-0.1592	1.2924	1.4508	1.0311	0.7244	0.9724	3.8386	1.8268
ENSMUSG00000017412	Cacnb4	-0.1857	1.1941	1.3922	2.6719	0.8649	0.2719	0.4544	0.3596
ENSMUSG00000037797	Adh4	1.5853	2.2425	1.1886	1.2117	1	2.84	1.88	1
ENSMUSG00000030607	Acan	0.9254	0.3687	1.1019	1.8679	0.4242	0.0909	0.4091	0.303
ENSMUSG00000064259	Vmn1r13	-1.1225	-1.9316	-1.7162	-1.1902	1.2041	54.8776	30.4082	113.408
ENSMUSG00000090625	Gm20721	1.6131	1.8516	1.5794	1.7566	0	0	0	0
ENSMUSG00000045587	BC049730	-0.0028	0.5737	1.9291	2.019	0.2105	0.1184	1.364	0
ENSMUSG00000041258	Zfp236	2.7721	1.8966	1.9967	2.3973	3.4706	1.7326	3.3529	7.9733
ENSMUSG00000042106	Fam212a	0.6269	1.4817	1.5799	1.7766	1.63	2.61	3.54	1.89
ENSMUSG00000054072	Iigp1	1.2969	0.8353	0.6997	1.6308	0.9115	0.7615	1.8615	5.3692
ENSMUSG00000032641	Gpr19	-2.3309	-2.4901	-2.7412	-2.6491	0.6729	1.1822	3.3785	0.9502
ENSMUSG00000024769	Cdc42bpg	1.2372	2.0193	1.7932	3.0867	1.2361	1.8333	3	1.9444
ENSMUSG00000009350	Mpo	-1.7239	-1.604	-1.8643	-1.3896	3.5	0.6667	1.1667	1.6667
ENSMUSG00000116043	LT629151.6	0	0	0	0	0	0	0	0
ENSMUSG00000057137	Tmem140	0.8655	1.4902	2.7634	2.2043	1.0217	3.2174	6.9565	2.1522
ENSMUSG00000026934	Lhx3	0.0467	1.778	2.2388	2.5021	0.2308	0.2051	1.5641	1.1795
ENSMUSG00000109378	U2af1l4	1.2246	1.9084	1.5443	2.3327	1	0.3784	0.6351	1.2568
ENSMUSG00000064325	Hhip	-1.6241	-2.1384	-1.4339	-1.8703	0.2987	0.088	0.7867	2.8373
ENSMUSG00000057534	Elobl	-0.5541	-1.5829	-0.0969	-0.8567	0.9781	0.6941	1.4814	0.5537
ENSMUSG00000031150	Ccdc120	0.951	0.9639	0.8829	2.1914	2.2981	3.0673	0.7019	0.3846
ENSMUSG00000001089	Luzp1	0.6335	0.8697	0.8056	1.5473	0.7627	1.0224	1.1285	1.2057
ENSMUSG00000033373	Fntb	0.8688	0.9988	1.2811	1.3905	0.8789	0.8379	0.75	0.748
ENSMUSG00000035580	Kcnh8	-1.5579	-2.3502	-2.891	-2.3994	1.1667	0.4167	0.3333	0.5833
ENSMUSG00000041801	Phlda3	0.4416	2.1275	2.0775	2.0158	0.4157	1.1461	2.7303	1.5618
ENSMUSG00000045625	Pigz	0.9672	0.5759	0.4211	1.67	3	4.5	4	0.5
ENSMUSG00000028893	Sesn2	0.4828	2.0415	1.9337	2.2426	1.26	4.8	8.38	5.74
ENSMUSG00000035692	Isg15	0.8877	0.3234	0.1385	2.0336	0.9821	0.7857	1.1786	2
ENSMUSG00000029221	Slc30a9	-0.9796	-1.3706	-1.1663	-1.5645	0.8705	0.7808	1.3638	1.3455
ENSMUSG00000034459	Ifit1	-1.4082	-0.3849	-0.4614	1.9274	2.9091	1.8182	12	19.6364
ENSMUSG00000055567	Unc80	-1.4659	-2.0005	-0.6568	-1.0562	2.6618	2.0588	1	1.1176
ENSMUSG00000034457	Eda2r	0.9708	2.4668	3.2352	3.3523	0.5844	2.2273	4.1623	5.2857
ENSMUSG00000037579	Kcnh3	0.9956	1.3613	1.7225	1.429	0.5	1.2963	0.4444	1
ENSMUSG00000025537	Phkg1	-1.3604	-1.8159	-1.6065	-1.1934	1.5882	7.1176	4.1471	14.6176
ENSMUSG00000038775	Vill	1.6454	1.1132	0.9095	1.4806	0.7128	1.0851	1.234	0.3138
ENSMUSG00000049999	Ppp1r3d	-0.8647	-1.968	-1.0302	-1.5912	0.3684	0.2807	0.9298	1.0702
ENSMUSG00000038115	Ano2	0.9494	1.8717	1.0526	0.5367	0.6276	2.6	1.1586	0.6828
ENSMUSG00000020799	Tekt1	-1.8345	-1.9885	-1.7147	-1.69	1.7429	1.9714	0.7143	0.8571
ENSMUSG00000031145	Prickle3	0.507	1.7119	1.8463	1.7108	1.6915	1.7872	5.5	3.3298
ENSMUSG00000019124	Scrn1	1.0238	1.1021	1.6124	0.5465	0.5224	1.3657	0.5746	1.1418
ENSMUSG00000074896	Ifit3	-0.8574	-1.3322	-1.8651	1.9506	0.3061	0.9592	0.1633	2.3878
ENSMUSG00000064016	Gm648	-0.9572	2.2954	2.4186	2.8326	2.8571	7.7143	89	42.2857
ENSMUSG00000030657	Xylt1	-1.007	-0.5355	-0.5857	-1.5002	0.5847	0.7641	1.0266	1.588
ENSMUSG00000042251	Pm20d1	-2.2893	-0.6644	-0.7116	-1.1689	2.3677	1.9686	1.3857	1.2915
ENSMUSG00000073436	Eme2	1.0027	0.3022	1.0894	1.6917	0.6812	1.0415	0.8668	0.8144
ENSMUSG00000030800	Prss8	0.3967	2.086	1.8598	1.5932	3.9394	3.0606	12.2424	2.6061
ENSMUSG00000004552	Ctse	-1.6801	-2.2899	-1.4652	-1.7452	0.3973	0.3836	1.0137	1.0548
ENSMUSG00000034361	Cpne2	1.1469	2.1372	2.5427	2.6621	1.2667	0.4792	1.0125	0.8833
ENSMUSG00000032469	Dbr1	0.7977	0.9136	0.4755	1.6122	0.6444	0.3014	0.6733	0.7924
ENSMUSG00000028715	Cyp4a14	0.7192	0.3773	1.1812	2.2318	19.6667	26	33.3333	0.6667
ENSMUSG00000024039	Cbs	-1.7067	-1.5534	-1.0919	-2.0296	0.2842	0.5579	1.7474	3.4526
ENSMUSG00000018634	Crhr1	0.0246	0.538	1.7125	2.4822	1.4286	1.5714	5.8571	4.1429
ENSMUSG00000078487	Ankrd65	0.1686	1.4364	2.7403	2.7941	4	6.5	65.5	66.5
ENSMUSG00000055639	Dach1	-1.0734	-1.5187	-1.3123	-1.5777	0.7065	0.9627	0.5274	0.8109
ENSMUSG00000047810	Ccdc88b	0.1547	1.9198	2.046	1.7986	0.6275	1.2549	4.2745	3.8039
ENSMUSG00000062393	Dgkk	-0.3511	-1.6786	-0.7757	-1.9421	0.4458	0.2048	0.4699	1.3494
ENSMUSG00000069874	Irgm2	0.7071	1.0031	1.054	2.1608	1.1339	1.4866	0.9955	1.9509
ENSMUSG00000030329	Pianp	0.791	1.0626	1.7931	1.3001	0.4975	0.6453	1.0936	0.266
ENSMUSG00000064065	Ipcef1	-1.6248	-2.2743	-0.9208	-0.676	0.3161	1.9598	0.6437	2.1379
ENSMUSG00000033355	Rtp4	-0.0048	-0.2724	0.1548	1.6903	1.7019	2.024	2.7837	4.0721
ENSMUSG00000046070	Igfals	-0.4272	1.8052	2.5838	2.6941	0.6	2	5.32	3.88
ENSMUSG00000055228	Zfp935	-0.2196	-2.1532	-0.5965	-0.2706	0.5451	0.891	1.2068	0.6353
ENSMUSG00000027663	Zmat3	0.4231	0.8781	1.1775	1.4974	1.7527	1.7391	2.2663	2.6223
ENSMUSG00000045281	Gpr20	1.844	1.684	1.5504	1.884	1.6095	1.019	0.9429	0.6286
ENSMUSG00000034275	Igsf9b	0.9782	1.6628	1.4408	1.4462	1.0857	1.0924	1.301	0.6866
ENSMUSG00000053411	Cbx7	0.8334	1.8195	-0.1443	-0.1648	0.5795	0.1007	0.0742	0.083
ENSMUSG00000024521	Pmaip1	0.4204	2.0093	2.7751	2.2404	3.9259	3.4444	12.3333	5.5556
ENSMUSG00000025762	Larp1b	-0.2337	-0.9592	-0.6026	-1.6422	1.0252	0.3323	0.2929	1.7528
ENSMUSG00000031937	Vstm5	1.4623	2.0227	1.2532	1.6935	0.7752	1.186	0.8837	1.1628
ENSMUSG00000035000	Dpp4	1.5034	0.6243	0.2565	0.951	1.3777	1.0899	1.1978	0.1906
ENSMUSG00000079432	Gm15023	2.2988	1.5886	2.5369	1.3209	0.215	0.514	1.5981	0.6075
ENSMUSG00000030924	Rexo5	1.002	1.4688	0.8316	0.9474	0.7402	0.9084	0.886	0.7495
ENSMUSG00000006641	Slc5a6	0.5497	2.3963	1.1402	2.0869	1.1333	0.986	0.5116	0.6419
ENSMUSG00000063193	Cd300lb	1.1009	1.4835	0.0666	2.0926	0.8	1.35	0.1	0.425
ENSMUSG00000078880	Gm14308	-1.7779	-1.1513	-0.6904	-1.5461	0.226	0.1735	1.0753	1.3425
ENSMUSG00000035578	Iqcg	-0.3716	-1.1053	-0.8791	-1.8457	0.793	0.3408	0.2516	0.9809
ENSMUSG00000035095	Fam167a	0.5414	1.0087	1.4992	1.5508	0.4894	6.9574	3.1489	3.4468
ENSMUSG00000049339	Retreg2	1.1823	1.6274	1.3157	1.7167	1.0302	1.1418	0.8998	0.6276
ENSMUSG00000062382	Ftl1-ps1	0.0114	-0.5833	-0.3356	-1.7981	0.8185	2.1979	1.0286	2.4072
ENSMUSG00000033508	Asprv1	2.1171	0.5507	0.2161	0.9188	1.44	0.52	0.88	0.96
ENSMUSG00000078907	Fam186b	-1.9789	-1.3061	-1.6582	-1.7921	0.5455	1.6364	1.0909	0.9091
ENSMUSG00000032854	Ugt8a	-0.4733	-1.7005	-1.3657	-0.5037	0.679	0.6481	0.1543	0.9938
ENSMUSG00000021361	Tmem14c	-0.1598	-1.9237	0.5284	-0.1784	0.9821	0.168	0.1215	0.9818
ENSMUSG00000044313	Mab21l3	1.8878	1.7525	1.9554	2.0531	2.4091	2.5455	3.4545	0.7273
ENSMUSG00000037025	Foxa2	-2.0757	-1.9795	-2.3971	-2.1001	0.3333	1	2.5	0.4167
ENSMUSG00000044551	9930012K11Rik	1.0478	3.2238	3.4065	3.5103	1.417	2.6009	9.5471	6.2332
ENSMUSG00000019558	Slc6a8	0.3143	0.4166	1.2392	1.9419	1.6923	1.0842	3.0879	2.6593
ENSMUSG00000040584	Abcb1a	0.5816	-1.8014	1.3357	1.0491	0.9769	1.2769	1.3538	2.8
ENSMUSG00000037509	Arhgef4	1.0565	0.598	1.9212	1.9176	0.7	3.8286	4.3714	1.6571
ENSMUSG00000067613	Krt83	0.8809	1.1933	1.5345	0.9955	1.1067	0.8444	1.1111	0.5467
ENSMUSG00000052087	Rgs14	-0.0873	0.7166	1.2515	1.9585	0.7917	0.6667	4.2083	2.2083
ENSMUSG00000020299	4930524B15Rik	0.6181	0.9473	1.3631	2.0057	1.2143	1.3571	4.1429	3.7143
ENSMUSG00000044816	D630023F18Rik	-0.3653	2.8046	3.3356	3.9548	1.5946	4	23.3784	25.1081
ENSMUSG00000027356	Fermt1	0.8204	3.0794	3.237	3.6269	1	11.8235	40.7059	26.7059
ENSMUSG00000038172	Ttc39b	0.7326	1.2895	1.4251	1.1925	1.8383	1.0908	2.0576	1.1473
ENSMUSG00000004031	Brinp2	-2.0251	-2.3536	-2.3413	-2.1076	0.2176	0.1389	0.1435	0.0787
ENSMUSG00000020326	Ccng1	0.0789	1.4179	1.7516	1.6189	0.9788	1.2229	2.4882	2.9967
ENSMUSG00000074345	Tnfaip8l3	-1.9771	-1.675	-1.3894	-1.6137	5.3333	0.381	1.4762	5.381
ENSMUSG00000084128	Esrp2	0.8437	2.1575	1.7813	1.7924	0.5258	1.8866	1.1134	1.8866
ENSMUSG00000047878	A4galt	0.9062	1.108	1.4449	1.6647	1.7618	2.6144	1.3668	2.069
ENSMUSG00000064202	4430402I18Rik	2.6799	2.6158	2.2465	1.1141	1.1233	1.0822	2.0685	0.5342
ENSMUSG00000021277	Traf3	0.4022	1.1779	1.5066	1.1673	0.5294	2.0662	3.9265	3.1103
ENSMUSG00000059336	Slc14a1	0.4826	-2.7802	-0.5794	-0.8097	14	9.2115	0.2885	10.3269
ENSMUSG00000026971	Itgb6	-0.7431	-1.86	-1.726	-0.3164	3.4	2.6	1.15	1.75
ENSMUSG00000113949	Scamp4	0.9475	1.224	1.1597	1.3349	0.8588	1.0305	0.7662	0.6933
ENSMUSG00000068744	Psrc1	0.9302	0.9154	1.5896	1.2288	0.5414	0.5897	1.531	2.2448
ENSMUSG00000041845	Rhod	1.5996	0.1727	2.0728	2.2692	2.0965	0.9474	1.5175	0.5789
ENSMUSG00000030107	Usp18	0.3155	0.3917	-0.0057	2.1678	1.3472	1.7083	1.3333	4.5139
ENSMUSG00000028358	Zfp618	1.2197	0.5266	0.8234	1.6066	1.7966	0.8656	1.168	0.332
ENSMUSG00000015533	Itga2	-0.91	-1.0557	-1.9311	-0.531	1.4625	1.8062	2.1625	1.175
ENSMUSG00000037033	Clca3b	-0.2253	0.1129	-0.1602	1.7192	1.7143	0.5714	0.0714	0.1429
ENSMUSG00000040918	Slc19a2	0.5054	1.2958	1.4012	1.2767	0.5564	1.1495	1.6373	2.2304
ENSMUSG00000022377	Asap1	1.4029	1.064	0.5388	0.4198	1.3922	1.2603	1.7457	1.9621
ENSMUSG00000048458	Fam212b	0.6706	1.7144	2.6106	1.967	1.1064	1.6596	1.8723	2.9787
ENSMUSG00000049744	Arhgap15	-2.0909	-3.0707	-2.776	-2.4356	1.2589	5.2284	25.9695	4.3198
ENSMUSG00000025278	Flnb	1.7743	1.5676	0.39	0.3766	0.5932	1.1128	0.9886	0.7764
ENSMUSG00000027073	Prg2	-3.0913	-2.2274	-2.3275	-2.7456	0.3	0.4667	0.4333	1.0667
ENSMUSG00000038738	Shank1	-1.0699	-1.2271	-2.2294	-1.6029	0.6809	0.617	0.3298	0.3723
ENSMUSG00000078500	Zfp986	0	0	0	0	0	0	0	0
ENSMUSG00000112814	Gm9040	-2.5036	-0.8878	-2.5052	-2.0825	0	0	0	0
ENSMUSG00000064288	Hist1h4k	-0.2379	-1.8724	-0.2667	-0.1005	0.932	0.6487	0.0737	0.4929
